# Supplementary material for: Serum uric acid and arterial hypertension—Data from Sephar III survey
Source: PLoS One. 2018 Jul 2;13(7):e0199865. doi: 10.1371/journal.pone.0199865 (PMC6028095; doi:10.1371/journal.pone.0199865)
Supplement: S1 File — (XLSX) [file pone.0199865.s001.xlsx]

## Sheet: data
PATIENT_ID	LOCATION	REGION	URBAN/RURAL	AGE	AGE_CATHEGORY	SEX	HEIGHT	WEIGHT	IMC	OBESITY	SMOKING	HYT_S3	HYPERTENSION CONTROLE	HYPERTENSION TREATMENT	SERUM CREATININE mg/dL	URINARY SODIUM mEg/L	ALBUMINORIA mg/L	URINARY CREATININE mg/dL	URINAR ALBUMINE CREATININE RATIO	SERUM URIC ACID	CSE_mg_dl	CSE_YMOL_L	CKD	DIALYSIS	RENAL DISEASE	URINARY TRACT INFECTIONS	RENAL BIOPSY	IMT mm
1.01.001.001	BACAU	NE	URBAN	51	40-60	M	185	93	27.17	ABSENT	ABSENT	YES	NO	NO	0.0112	0	0	0	.	7	0.99	87.52	NO	ABSENT	ABSENT	NO	NO	0.77
1.01.001.002	BACAU	NE	URBAN	62	>60	M	165	88	32.32	PRESENT	ABSENT	YES	NO	NO	0.0099	0	0	0	.	5.1	0.88	77.79	NO	ABSENT	ABSENT	NO	NO	0.9
1.01.001.004	BACAU	NE	URBAN	53	40-60	F	163	99	37.26	PRESENT	PRESENT	YES	NO	NO	0.0104	0	0	0	.	4.2	0.92	81.33	NO	ABSENT	ABSENT	NO	NO	0.56
1.01.001.005	BACAU	NE	URBAN	21	< 40 ?	F	172	63	21.3	ABSENT	PRESENT	YES	YES	YES	0.0092	0	0	0	.	3.6	0.81	71.6	NO	ABSENT	ABSENT	NO	NO	0.5
1.01.001.006	BACAU	NE	URBAN	22	< 40 ?	F	166	66	23.95	ABSENT	PRESENT	NO	YES	YES	0.0078	0	0	0	.	3.6	0.69	61	NO	ABSENT	ABSENT	NO	NO	0.53
1.01.001.007	BACAU	NE	URBAN	77	>60	F	163	63	23.71	ABSENT	ABSENT	YES	NO	NO	0.0064	0	0	0	.	4	0.57	50.39	NO	ABSENT	ABSENT	NO	NO	0.72
1.01.001.008	BACAU	NE	URBAN	76	>60	M	174	96	31.71	PRESENT	ABSENT	NO	NO	NO	0.0095	0	0	0	.	6.6	0.84	74.26	NO	ABSENT	ABSENT	NO	NO	0.9
1.01.001.009	BACAU	NE	URBAN	34	< 40 ?	M	179	89	27.78	ABSENT	PRESENT	NO	NO	NO	0.0097	0	0	0	.	5.7	0.86	76.02	NO	ABSENT	ABSENT	NO	NO	0.62
1.01.001.010	BACAU	NE	URBAN	40	40-60	M	167	80	28.69	ABSENT	PRESENT	NO	NO	NO	0.0099	253	11.3	208	5.4	6.1	0.88	77.79	NO	ABSENT	ABSENT	NO	NO	0.52
1.01.001.011	BACAU	NE	URBAN	39	< 40 ?	F	145	87	41.38	PRESENT	ABSENT	NO	NO	NO	0.0064	0	0	0	.	3.8	0.57	50.39	NO	ABSENT	ABSENT	NO	NO	0.66
1.01.001.012	BACAU	NE	URBAN	28	< 40 ?	M	178	86	27.14	ABSENT	ABSENT	NO	YES	NO	0.0123	0	0	0	.	6.6	1.09	96.36	NO	ABSENT	ABSENT	YES	NO	0.69
1.01.001.013	BACAU	NE	URBAN	43	40-60	F	162	58	22.1	ABSENT	PRESENT	NO	YES	NO	0.008	0	0	0	.	3.3	0.71	62.76	NO	ABSENT	ABSENT	NO	NO
1.01.001.014	BACAU	NE	URBAN	28	< 40 ?	M	180	70	21.6	ABSENT	ABSENT	NO	YES	NO	0.0095	0	0	0	.	4.2	0.84	74.26	NO	ABSENT	ABSENT	YES	NO
1.01.001.015	BACAU	NE	URBAN	46	40-60	M	172	69	23.32	ABSENT	PRESENT	YES	YES	NO	0.0104	0	0	0	.	6	0.92	81.33	NO	ABSENT	ABSENT	NO	NO
1.01.001.016	BACAU	NE	URBAN	75	>60	F	153	80	34.17	PRESENT	PRESENT	NO	YES	NO	0.0089	0	0	0	.	3.7	0.79	69.84	NO	ABSENT	ABSENT	NO	NO
1.01.001.017	BACAU	NE	URBAN	38	< 40 ?	F	170	54	18.69	ABSENT	ABSENT	NO	NO	YES	0.009	0	0	0	.	4.4	0.8	70.72	NO	ABSENT	ABSENT	YES	NO
1.01.001.018	BACAU	NE	URBAN	32	< 40 ?	M	188	80	22.63	ABSENT	ABSENT	NO	YES	YES	0.0127	0	0	0	.	6.1	1.12	99.01	NO	ABSENT	ABSENT	NO	NO
1.01.001.019	BACAU	NE	URBAN	34	< 40 ?	F	163	51	19.2	ABSENT	ABSENT	NO	NO	NO	0.0088	0	0	0	.	4.9	0.78	68.95	NO	ABSENT	ABSENT	NO	NO
1.01.001.020	BACAU	NE	URBAN	42	40-60	M	178	77	24.3	ABSENT	PRESENT	YES	NO	NO	0.0115	0	0	0	.	5.6	1.02	90.17	NO	ABSENT	ABSENT	NO	NO
1.01.001.021	BACAU	NE	URBAN	37	< 40 ?	M	180	86	26.54	ABSENT	ABSENT	NO	NO	YES	0.012	0	0	0	.	5.4	1.06	93.7	NO	ABSENT	ABSENT	NO	NO
1.01.075.000	SASYEST	NE	RURAL	26	< 40 ?	M	168	79	27.99	ABSENT	ABSENT	NO	YES	NO	0.0081	0	0	0	.	8.9	0.72	63.65	NO	ABSENT	ABSENT	YES	NO
1.01.075.001	SASYEST	NE	RURAL	52	40-60	M	168	105	37.2	PRESENT	ABSENT	YES	NO	NO	0.0087	0	0	0	.	4.4	0.77	68.07	NO	ABSENT	ABSENT	YES	NO
1.01.075.002	SASYEST	NE	RURAL	65	>60	F	164	103	38.3	PRESENT	ABSENT	YES	NO	NO	0.0081	0	0	0	.	4.6	0.72	63.65	NO	ABSENT	ABSENT	NO	NO
1.01.075.003	SASYEST	NE	RURAL	20	< 40 ?	F	163	49	18.44	ABSENT	ABSENT	YES	YES	NO	0.0072	0	0	0	.	3.6	0.64	56.58	NO	ABSENT	ABSENT	YES	NO
1.01.075.004	SASYEST	NE	RURAL	47	40-60	F	165	93	34.16	PRESENT	ABSENT	YES	NO	YES	0.0077	0	0	0	.	3.5	0.68	60.11	NO	ABSENT	ABSENT	NO	NO
1.01.075.006	SASYEST	NE	RURAL	48	40-60	M	179	94	29.34	ABSENT	ABSENT	NO	NO	NO	0.0103	0	0	0	.	4.9	0.91	80.44	.	ABSENT	ABSENT	YES	NO	0.55
1.01.075.007	SASYEST	NE	RURAL	77	>60	F	143	66	32.28	PRESENT	ABSENT	YES	NO	NO	0.0088	0	0	0	.	4.8	0.78	68.95	NO	ABSENT	ABSENT	NO	NO
1.01.075.008	SASYEST	NE	RURAL	33	< 40 ?	F	163	94	35.38	PRESENT	ABSENT	YES	NO	NO	0.0084	0	0	0	.	4.3	0.74	65.42	NO	ABSENT	ABSENT	UNKNOWN	NO
1.01.075.009	SASYEST	NE	RURAL	47	40-60	F	165	65	23.88	ABSENT	ABSENT	YES	NO	NO	0.0085	0	0	0	.	3.2	0.75	66.3	NO	ABSENT	ABSENT	NO	NO
1.01.075.010	SASYEST	NE	RURAL	29	< 40 ?	F	163	90	33.87	PRESENT	PRESENT	NO	YES	YES	0.0061	0	0	0	.	5.7	0.54	47.74	NO	ABSENT	ABSENT	YES	NO
1.01.075.011	SASYEST	NE	RURAL	74	>60	M	162	62	23.62	ABSENT	ABSENT	NO	NO	NO	0.0123	0	0	0	.	5	1.09	96.36	NO	ABSENT	ABSENT	NO	NO
1.01.075.013	SASYEST	NE	RURAL	77	>60	F	138	37	19.43	ABSENT	ABSENT	NO	YES	NO	0.008	0	0	0	.	3.1	0.71	62.76	NO	ABSENT	ABSENT	YES	NO
1.01.075.014	SASYEST	NE	RURAL	75	>60	M	154	59	24.88	ABSENT	ABSENT	NO	NO	NO	0.0122	0	0	0	.	6.1	1.08	95.47	NO	ABSENT	ABSENT	YES	NO
1.01.075.015	SASYEST	NE	RURAL	26	< 40 ?	M	180	99	30.56	PRESENT	PRESENT	NO	YES	NO	0.0108	0	0	0	.	5.3	0.96	84.86	NO	ABSENT	ABSENT	YES	NO
1.01.075.016	SASYEST	NE	RURAL	36	< 40 ?	F	153	53	22.64	ABSENT	PRESENT	YES	YES	NO	0.0066	0	0	0	.	4	0.58	51.27	NO	ABSENT	ABSENT	NO	NO
1.01.075.017	SASYEST	NE	RURAL	43	40-60	M	179	113	35.27	PRESENT	ABSENT	YES	NO	YES	0.0084	0	0	0	.	5.2	0.74	65.42	.	ABSENT	ABSENT	NO	NO
1.01.075.018	SASYEST	NE	RURAL	18	< 40 ?	M	172	62	20.96	ABSENT	ABSENT	NO	YES	NO	0.0095	0	0	0	.	4.1	0.84	74.26	NO	.	ABSENT	.	0
1.02.001.001	BOTOS	NE	URBAN	39	< 40 ?	M	177	74.5	23.78	ABSENT	PRESENT	NO	YES	NO	0.013	159	2.3	186	1.2	4.9	1.15	101.66	NO	ABSENT	ABSENT	NO	NO
1.02.001.002	BOTOS	NE	URBAN	40	40-60	M	178	85	26.83	ABSENT	ABSENT	YES	NO	NO	0.009	248	3.3	77	4.3	6.9	0.8	70.72	NO	ABSENT	ABSENT	NO	NO
1.02.001.003	BOTOS	NE	URBAN	24	< 40 ?	F	180	102	31.48	PRESENT	PRESENT	NO	NO	NO	0.0077	122	16.1	239	6.7	3.6	0.68	60.11	NO	.	ABSENT	.	0
1.02.001.004	BOTOS	NE	URBAN	18	< 40 ?	M	180	73	22.53	ABSENT	ABSENT	NO	YES	NO	0.0113	95	4.1	175	2.3	7.4	1	88.4	NO	.	ABSENT	.	0
1.02.001.005	BOTOS	NE	URBAN	44	40-60	F	162	84	32.01	PRESENT	PRESENT	YES	NO	NO	0.0078	174	16.3	239	6.8	5.5	0.69	61	NO	ABSENT	ABSENT	NO	NO
1.02.001.006	BOTOS	NE	URBAN	21	< 40 ?	F	155	37	15.4	ABSENT	ABSENT	YES	YES	NO	0.0071	94	32.3	223	14.5	2.9	0.63	55.69	NO	ABSENT	ABSENT	NO	NO
1.02.001.007	BOTOS	NE	URBAN	24	< 40 ?	M	181	67	20.45	ABSENT	ABSENT	NO	YES	NO	0.0081	159	6.9	258	2.7	4.3	0.72	63.65	NO	ABSENT	ABSENT	NO	NO
1.02.001.008	BOTOS	NE	URBAN	42	40-60	F	168	61	21.61	ABSENT	PRESENT	NO	YES	NO	0.0087	209	11.7	282	4.1	4.3	0.77	68.07	NO	ABSENT	ABSENT	YES	NO
1.02.001.009	BOTOS	NE	URBAN	40	40-60	F	150	69	30.67	PRESENT	ABSENT	NO	YES	NO	0.008	44	1.7	51	3.3	4.6	0.71	62.76	NO	ABSENT	ABSENT	NO	NO
1.02.001.010	BOTOS	NE	URBAN	33	< 40 ?	M	180	84	25.93	ABSENT	PRESENT	NO	YES	YES	0.0112	20	2.6	124	2.1	4.4	0.99	87.52	NO	ABSENT	ABSENT	YES	NO
1.02.001.011	BOTOS	NE	URBAN	31	< 40 ?	M	172	100	33.8	PRESENT	ABSENT	NO	NO	NO	0.0101	135	16.6	417	4	6.1	0.89	78.68	NO	ABSENT	ABSENT	YES	NO
1.02.001.012	BOTOS	NE	URBAN	78	>60	F	164	82	30.49	PRESENT	ABSENT	NO	NO	YES	0.0081	152	6.9	51	13.5	4.7	0.72	63.65	NO	ABSENT	ABSENT	NO	NO	0.75
1.02.001.013	BOTOS	NE	URBAN	29	< 40 ?	M	186	105	30.35	PRESENT	PRESENT	NO	YES	NO	0.0123	131	5.4	182	3	5.7	1.09	96.36	NO	ABSENT	ABSENT	NO	NO
1.02.001.014	BOTOS	NE	URBAN	60	>60	F	156	81.5	33.49	PRESENT	ABSENT	NO	YES	YES	0.0096	49	1.2	49	2.4	5.6	0.85	75.14	NO	ABSENT	ABSENT	YES	NO
1.02.033.001	FRUMUSICA	NE	RURAL	43	40-60	F	165	63	23.14	ABSENT	ABSENT	NO	YES	NO	0.0081	169	2.1	60	3.5	3.4	0.72	63.65	NO	ABSENT	ABSENT	NO	NO
1.02.033.002	FRUMUSICA	NE	RURAL	43	40-60	M	156	65	26.71	ABSENT	PRESENT	NO	YES	NO	0.0093	107	9.9	207	4.8	6	0.82	72.49	NO	ABSENT	ABSENT	NO	NO
1.02.033.003	FRUMUSICA	NE	RURAL	70	>60	F	151	78	34.21	PRESENT	ABSENT	YES	NO	NO	0.0077	152	2.5	64	3.9	4.7	0.68	60.11	NO	.	ABSENT	.	0
1.02.033.005	FRUMUSICA	NE	RURAL	29	< 40 ?	F	147	52	24.06	ABSENT	ABSENT	NO	YES	NO	0.0057	304	11.9	164	7.3	2.3	0.5	44.2	NO	ABSENT	ABSENT	NO	NO
1.02.033.006	FRUMUSICA	NE	RURAL	52	40-60	F	149	53	23.87	ABSENT	ABSENT	YES	NO	NO	0.0061	35	2.9	59	4.9	4.3	0.54	47.74	NO	ABSENT	ABSENT	NO	NO	0.6
1.02.033.007	FRUMUSICA	NE	RURAL	72	>60	M	164	60	22.31	ABSENT	ABSENT	YES	NO	YES	0.0093	236	2.4	113	2.1	6.2	0.82	72.49	NO	ABSENT	ABSENT	NO	NO
1.02.033.008	FRUMUSICA	NE	RURAL	39	< 40 ?	F	165	67	24.61	ABSENT	ABSENT	NO	NO	NO	0.0075	110	24	248	9.7	3.5	0.66	58.34	NO	ABSENT	ABSENT	NO	NO
1.02.033.009	FRUMUSICA	NE	RURAL	32	< 40 ?	M	174	71	23.45	ABSENT	ABSENT	NO	NO	NO	0.0085	53	5.6	140	4	4.8	0.75	66.3	NO	ABSENT	ABSENT	NO	NO
1.02.033.010	FRUMUSICA	NE	RURAL	42	40-60	M	172	64	21.63	ABSENT	ABSENT	YES	NO	NO	0.0084	132	4.8	174	2.8	4.2	0.74	65.42	NO	ABSENT	ABSENT	YES	NO
1.02.033.012	FRUMUSICA	NE	RURAL	40	40-60	M	182	102	30.79	PRESENT	ABSENT	YES	NO	NO	0.0101	250	57.3	177	32.4	6.5	0.89	78.68	NO	ABSENT	ABSENT	YES	NO
1.02.033.013	FRUMUSICA	NE	RURAL	24	< 40 ?	M	182	70	21.13	ABSENT	PRESENT	YES	YES	NO	0.0121	34	26.2	148	17.7	6.7	1.07	94.59	NO	.	ABSENT	.	0
1.02.033.014	FRUMUSICA	NE	RURAL	26	< 40 ?	F	158	53	21.23	ABSENT	ABSENT	YES	YES	NO	0.0086	129	29.8	136	21.9	2.9	0.76	67.18	NO	ABSENT	ABSENT	NO	NO
1.02.033.015	FRUMUSICA	NE	RURAL	51	40-60	M	183	107	31.95	PRESENT	ABSENT	YES	NO	YES	0.0098	194	13.5	300	4.5	6	0.87	76.91	NO	ABSENT	ABSENT	NO	NO
1.02.033.016	FRUMUSICA	NE	RURAL	77	>60	F	144	77	37.13	PRESENT	ABSENT	YES	NO	NO	0.007	82	25.9	45	57.6	5.2	0.62	54.81	NO	ABSENT	ABSENT	YES	NO
1.02.033.017	FRUMUSICA	NE	RURAL	78	>60	M	159	54	21.36	ABSENT	ABSENT	NO	NO	NO	0.0119	104	6.2	68	9.1	7.8	1.05	92.82	NO	ABSENT	ABSENT	NO	NO
1.03.001.001	IASI	NE	URBAN	75	>60	F	146	77	36.12	PRESENT	ABSENT	YES	NO	YES	0.0108	162	23.7	46	51.5	5.4	0.96	84.86	NO	ABSENT	ABSENT	NO	NO	0.88
1.03.001.002	IASI	NE	URBAN	47	40-60	F	162	86	32.77	PRESENT	ABSENT	YES	YES	YES	0.0098	152	12.7	190	6.7	4.3	0.87	76.91	NO	ABSENT	ABSENT	NO	NO
1.03.001.003	IASI	NE	URBAN	31	< 40 ?	F	154	60	25.3	ABSENT	ABSENT	NO	NO	NO	0.0059	239	4.6	134	3.4	3.6	0.52	45.97	NO	ABSENT	ABSENT	NO	NO
1.03.001.004	IASI	NE	URBAN	51	40-60	M	164	80	29.74	ABSENT	ABSENT	YES	YES	YES	0.0081	206	17.7	278	6.4	4.7	0.72	63.65	NO	ABSENT	ABSENT	NO	NO	0.66
1.03.001.005	IASI	NE	URBAN	70	>60	M	167	88	31.55	PRESENT	PRESENT	YES	NO	NO	0.0081	82	1.7	63	2.7	7.3	0.72	63.65	NO	ABSENT	ABSENT	NO	NO
1.03.001.006	IASI	NE	URBAN	30	< 40 ?	F	162	83.5	31.82	PRESENT	ABSENT	NO	YES	NO	0.0076	145	7.1	207	3.4	5.6	0.67	59.23	NO	ABSENT	ABSENT	NO	NO
1.03.001.007	IASI	NE	URBAN	80	>60	M	160	64	25	ABSENT	ABSENT	YES	YES	NO	0.0119	87	4	108	3.7	6.8	1.05	92.82	NO	ABSENT	ABSENT	YES	NO	0.9
1.03.001.008	IASI	NE	URBAN	38	< 40 ?	M	174	61.5	20.31	ABSENT	ABSENT	YES	YES	NO	0.0085	76	1.1	83	1.3	5	0.75	66.3	NO	ABSENT	ABSENT	NO	NO
1.03.001.009	IASI	NE	URBAN	36	< 40 ?	F	165	78	28.65	ABSENT	ABSENT	NO	YES	NO	0.0093	242	11.5	339	3.4	4.5	0.82	72.49	NO	ABSENT	ABSENT	NO	NO
1.03.001.010	IASI	NE	URBAN	42	40-60	F	158	50	20.03	ABSENT	ABSENT	NO	YES	NO	0.0081	39	15	364	4.1	4.2	0.72	63.65	NO	ABSENT	ABSENT	NO	NO
1.03.001.011	IASI	NE	URBAN	80	>60	F	150	52	23.11	ABSENT	ABSENT	NO	YES	NO	0.0075	98	2.9	99	2.9	5.8	0.66	58.34	NO	ABSENT	ABSENT	NO	NO	0.89
1.03.001.012	IASI	NE	URBAN	37	< 40 ?	F	164	64	23.8	ABSENT	ABSENT	YES	YES	NO	0.0073	88	14.7	114	12.9	3	0.65	57.46	NO	ABSENT	ABSENT	NO	NO
1.03.001.013	IASI	NE	URBAN	29	< 40 ?	M	178	78	24.62	ABSENT	ABSENT	NO	YES	NO	0.0104	84	1.7	112	1.5	6.9	0.92	81.33	NO	ABSENT	ABSENT	NO	NO
1.03.001.014	IASI	NE	URBAN	29	< 40 ?	M	164	64	23.8	ABSENT	PRESENT	YES	YES	NO	0.0111	142	5.4	245	2.2	4.5	0.98	86.63	NO	ABSENT	ABSENT	NO	NO
1.03.001.015	IASI	NE	URBAN	59	40-60	M	176	105	33.9	PRESENT	ABSENT	YES	NO	NO	0.0115	75	7.5	206	3.6	6.9	1.02	90.17	NO	ABSENT	ABSENT	NO	NO
1.03.001.016	IASI	NE	URBAN	44	40-60	M	176	80	25.83	ABSENT	PRESENT	YES	YES	NO	0.0119	28	0.9	90	1	4.8	1.05	92.82	NO	ABSENT	ABSENT	NO	NO
1.03.001.017	IASI	NE	URBAN	26	< 40 ?	F	172	74	25.01	ABSENT	ABSENT	NO	YES	NO	0.0081	57	9.6	211	4.5	3.6	0.72	63.65	NO	ABSENT	ABSENT	YES	NO
1.03.001.018	IASI	NE	URBAN	47	40-60	M	178	92	29.04	ABSENT	ABSENT	YES	NO	NO	0.0099	141	1.7	139	1.2	5.1	0.88	77.79	NO	ABSENT	ABSENT	NO	NO
1.03.001.019	IASI	NE	URBAN	40	40-60	M	176	154	49.72	PRESENT	ABSENT	YES	YES	NO	0.0131	102	0.8	112	0.7	10.6	1.16	102.54	NO	ABSENT	ABSENT	UNKNOWN	NO
1.03.055.001	MIROSLAVA	NE	RURAL	28	< 40 ?	F	166	69.2	25.11	ABSENT	ABSENT	NO	YES	NO	0.0072	117	25.4	279	9.1	4	0.64	56.58	NO	ABSENT	ABSENT	NO	NO
1.03.055.003	MIROSLAVA	NE	RURAL	47	40-60	F	160	93.8	36.64	PRESENT	ABSENT	NO	NO	YES	0.0092	56	2.9	72	4	3.7	0.81	71.6	NO	ABSENT	ABSENT	YES	NO
1.03.055.004	MIROSLAVA	NE	RURAL	56	40-60	F	165	70	25.71	ABSENT	ABSENT	YES	NO	NO	0.0073	72	0.6	53	1.1	3.6	0.65	57.46	NO	ABSENT	ABSENT	NO	NO	0.89
1.03.055.005	MIROSLAVA	NE	RURAL	56	40-60	M	186	116.7	33.73	PRESENT	ABSENT	NO	NO	NO	0.0075	197	2.6	155	1.7	5.7	0.66	58.34	NO	ABSENT	ABSENT	YES	NO
1.03.055.006	MIROSLAVA	NE	RURAL	51	40-60	M	198	85.6	21.83	ABSENT	PRESENT	NO	NO	NO	0.0081	57	123.2	115	107.1	6.5	0.72	63.65	NO	ABSENT	ABSENT	NO	NO	0.82
1.03.055.007	MIROSLAVA	NE	RURAL	42	40-60	F	164	77.2	28.7	ABSENT	ABSENT	NO	YES	NO	0.0079	61	1.2	75	1.6	4.3	0.7	61.88	NO	ABSENT	ABSENT	NO	NO
1.03.055.008	MIROSLAVA	NE	RURAL	26	< 40 ?	F	160	50	19.53	ABSENT	PRESENT	NO	YES	NO	0.0082	162	37.7	248	15.2	2.6	0.73	64.53	NO	ABSENT	ABSENT	NO	NO
1.03.055.009	MIROSLAVA	NE	RURAL	60	>60	F	159	76.6	30.3	PRESENT	ABSENT	YES	NO	YES	0.0096	144	18.7	211	8.9	5.7	0.85	75.14	NO	ABSENT	ABSENT	YES	NO
1.03.055.010	MIROSLAVA	NE	RURAL	41	40-60	F	165	76.3	28.03	ABSENT	ABSENT	NO	YES	NO	0.0064	104	4	133	3	4.3	0.57	50.39	.	ABSENT	ABSENT	YES	NO
1.03.055.012	MIROSLAVA	NE	RURAL	67	>60	F	158	65	26.04	ABSENT	ABSENT	NO	YES	YES	0.0075	67	0.8	29	2.8	3.6	0.66	58.34	NO	ABSENT	ABSENT	NO	NO
1.03.055.013	MIROSLAVA	NE	RURAL	49	40-60	M	174	83.5	27.58	ABSENT	PRESENT	NO	YES	NO	0.0104	74	5.9	118	5	4.6	0.92	81.33	NO	ABSENT	ABSENT	YES	NO	1.16
1.03.055.014	MIROSLAVA	NE	RURAL	23	< 40 ?	M	192	82	22.24	ABSENT	ABSENT	YES	YES	NO	0.0105	146	2.9	196	1.5	5.3	0.93	82.21	NO	ABSENT	ABSENT	NO	NO
1.03.055.015	MIROSLAVA	NE	RURAL	33	< 40 ?	M	172	76	25.69	ABSENT	ABSENT	NO	YES	YES	0.0104	151	4.5	251	1.8	3.4	0.92	81.33	NO	ABSENT	ABSENT	NO	NO
1.03.055.016	MIROSLAVA	NE	RURAL	70	>60	M	166	95	34.48	PRESENT	ABSENT	YES	NO	NO	0.0092	173	3.6	54	6.7	5.3	0.81	71.6	NO	ABSENT	ABSENT	NO	NO
1.03.055.017	MIROSLAVA	NE	RURAL	30	< 40 ?	M	170	77	26.64	ABSENT	ABSENT	NO	NO	NO	0.0112	79	1.5	153	1	6.7	0.99	87.52	NO	ABSENT	ABSENT	NO	NO
1.03.055.018	MIROSLAVA	NE	RURAL	56	40-60	M	182	110.4	33.33	PRESENT	ABSENT	NO	NO	YES	0.0085	133	2.1	123	1.7	4.9	0.75	66.3	NO	ABSENT	ABSENT	NO	NO
1.03.055.019	MIROSLAVA	NE	RURAL	23	< 40 ?	F	167	75	26.89	ABSENT	PRESENT	NO	YES	YES	0.0081	114	4.4	242	1.8	4.1	0.72	63.65	NO	ABSENT	ABSENT	NO	NO
1.03.055.020	MIROSLAVA	NE	RURAL	73	>60	M	177	83.1	26.52	ABSENT	ABSENT	NO	NO	YES	0.0094	170	9.8	173	5.7	5.5	0.83	73.37	NO	ABSENT	ABSENT	NO	NO	0.9
1.03.055.021	MIROSLAVA	NE	RURAL	75	>60	M	163	74	27.85	ABSENT	ABSENT	YES	NO	NO	0.0158	109	0.8	69	1.2	5.3	1.4	123.76	NO	ABSENT	ABSENT	NO	NO	0.75
1.03.055.022	MIROSLAVA	NE	RURAL	52	40-60	M	175	79	25.8	ABSENT	ABSENT	NO	YES	YES	0.0125	241	1.7	101	1.7	3.2	1.11	98.12	.	ABSENT	ABSENT	YES	NO
1.03.055.023	MIROSLAVA	NE	RURAL	78	>60	F	160	49	19.14	ABSENT	PRESENT	YES	NO	NO	0.0139	141	43.6	82	53.2	7.1	1.23	108.73	NO	ABSENT	ABSENT	NO	NO	1.03
1.03.055.025	MIROSLAVA	NE	RURAL	33	< 40 ?	M	183	91	27.17	ABSENT	ABSENT	NO	YES	YES	0.0136	109	5.1	161	3.2	6	1.2	106.08	NO	ABSENT	ABSENT	NO	NO
1.03.055.026	MIROSLAVA	NE	RURAL	58	40-60	F	163	95	35.76	PRESENT	ABSENT	YES	YES	NO	0.0086	158	2.5	126	2	2.9	0.76	67.18	NO	ABSENT	ABSENT	NO	NO
1.03.055.027	MIROSLAVA	NE	RURAL	36	< 40 ?	M	178	95	29.98	ABSENT	ABSENT	NO	YES	NO	0.0139	105	0.6	129	0.5	7.4	1.23	108.73	NO	ABSENT	ABSENT	YES	NO
1.03.055.029	MIROSLAVA	NE	RURAL	79	>60	F	160	94	36.72	PRESENT	ABSENT	YES	NO	NO	0.0079	113	1.7	78	2.2	4.2	0.7	61.88	YES	ABSENT	PRESENT	NO	NO
1.03.055.030	MIROSLAVA	NE	RURAL	31	< 40 ?	M	176	67	21.63	ABSENT	PRESENT	NO	YES	NO	0.0096	83	20.8	134	15.5	5.1	0.85	75.14	NO	ABSENT	ABSENT	NO	NO
1.03.055.031	MIROSLAVA	NE	RURAL	41	40-60	F	155	70	29.14	ABSENT	PRESENT	NO	YES	NO	0.0071	124	2.7	113	2.4	3.3	0.63	55.69	NO	ABSENT	ABSENT	NO	NO
1.03.055.032	MIROSLAVA	NE	RURAL	73	>60	F	161	60	23.15	ABSENT	PRESENT	YES	YES	NO	0.0063	109	1.3	41	3.2	4.6	0.56	49.5	NO	ABSENT	ABSENT	NO	NO	0.75
1.03.055.033	MIROSLAVA	NE	RURAL	37	< 40 ?	M	170	72	24.91	ABSENT	PRESENT	NO	YES	NO	0.0098	141	1.3	138	0.9	2.9	0.87	76.91	YES	ABSENT	PRESENT	YES	NO
1.03.055.034	MIROSLAVA	NE	RURAL	37	< 40 ?	M	178	86	27.14	ABSENT	ABSENT	NO	NO	NO	0.0087	61	23.6	279	8.5	7.2	0.77	68.07	NO	ABSENT	ABSENT	NO	NO
1.03.055.035	MIROSLAVA	NE	RURAL	67	>60	M	160	80	31.25	PRESENT	ABSENT	NO	NO	NO	0.0092	152	4.2	159	2.6	6.1	0.81	71.6	NO	ABSENT	ABSENT	NO	NO
1.03.055.036	MIROSLAVA	NE	RURAL	46	40-60	F	172	76	25.69	ABSENT	ABSENT	NO	YES	YES	0.0082	109	4.7	198	2.4	3.9	0.73	64.53	NO	ABSENT	ABSENT	NO	NO
1.03.055.037	MIROSLAVA	NE	RURAL	44	40-60	M	183	65	19.41	ABSENT	ABSENT	NO	YES	NO	0.0099	154	2.3	146	1.6	4.6	0.88	77.79	NO	ABSENT	ABSENT	NO	NO
1.04.002.001	ROMAN	NE	URBAN	35	< 40 ?	M	187	104	29.74	ABSENT	ABSENT	NO	YES	NO	0.0134	82	3.1	146	2.1	5.6	1.19	105.2	NO	ABSENT	ABSENT	YES	NO
1.04.002.002	ROMAN	NE	URBAN	39	< 40 ?	M	181	77	23.5	ABSENT	PRESENT	NO	YES	YES	0.0089	281	5.4	154	3.5	5.4	0.79	69.84	NO	ABSENT	ABSENT	NO	NO
1.04.002.003	ROMAN	NE	URBAN	60	>60	M	180	88	27.16	ABSENT	ABSENT	NO	NO	NO	0.012	157	2.4	99	2.4	4.8	1.06	93.7	NO	ABSENT	ABSENT	NO	NO
1.04.002.004	ROMAN	NE	URBAN	80	>60	M	157	71	28.8	ABSENT	ABSENT	YES	NO	NO	0.021	65	366.1	118	310.3	9.4	1.86	164.42	NO	ABSENT	PRESENT	NO	NO	1.32
1.04.002.005	ROMAN	NE	URBAN	32	< 40 ?	M	173	91	30.41	PRESENT	PRESENT	NO	NO	NO	0.0108	183	8.8	176	5	2.7	0.96	84.86	NO	ABSENT	ABSENT	NO	NO
1.04.002.006	ROMAN	NE	URBAN	41	40-60	F	176	108	34.87	PRESENT	ABSENT	NO	NO	NO	0.0095	130	5.9	215	2.7	4.2	0.84	74.26	NO	ABSENT	ABSENT	NO	NO
1.04.002.007	ROMAN	NE	URBAN	34	< 40 ?	M	177	94	30	PRESENT	ABSENT	NO	YES	NO	0.0095	145	4	110	3.6	4.9	0.84	74.26	NO	ABSENT	ABSENT	NO	NO
1.04.002.008	ROMAN	NE	URBAN	79	>60	F	152	63	27.27	ABSENT	ABSENT	YES	NO	NO	0.0095	128	1.6	68	2.4	5	0.84	74.26	NO	ABSENT	ABSENT	NO	NO	1.03
1.04.002.009	ROMAN	NE	URBAN	79	>60	F	163	58	21.83	ABSENT	ABSENT	YES	YES	NO	0.0088	96	3.4	63	5.4	9.8	0.78	68.95	NO	ABSENT	ABSENT	NO	NO	0.92
1.04.002.010	ROMAN	NE	URBAN	27	< 40 ?	M	191	100	27.41	ABSENT	PRESENT	NO	NO	YES	0.0089	56	3.6	96	3.8	5.8	0.79	69.84	NO	ABSENT	ABSENT	NO	NO
1.04.002.012	ROMAN	NE	URBAN	40	40-60	M	183	107	31.95	PRESENT	PRESENT	YES	NO	NO	0.0103	103	2.8	105	2.7	7.5	0.91	80.44	NO	ABSENT	ABSENT	YES	NO
1.04.002.013	ROMAN	NE	URBAN	36	< 40 ?	F	177	78	24.9	ABSENT	ABSENT	NO	YES	NO	0.0073	123	3.2	86	3.7	2.5	0.65	57.46	NO	ABSENT	ABSENT	NO	NO
1.04.002.014	ROMAN	NE	URBAN	22	< 40 ?	M	175	63	20.57	ABSENT	PRESENT	NO	YES	NO	0.0125	71	4.9	263	1.9	5.3	1.11	98.12	NO	ABSENT	ABSENT	NO	NO
1.04.002.015	ROMAN	NE	URBAN	20	< 40 ?	F	167	75	26.89	ABSENT	ABSENT	NO	YES	NO	0.0093	81	3.3	132	2.5	6.3	0.82	72.49	NO	ABSENT	ABSENT	YES	NO
1.04.029.001	DOLJESTI	NE	RURAL	76	>60	F	147	77	35.63	PRESENT	ABSENT	NO	NO	NO	0.0093	81	8.7	123	7.1	3.5	0.82	72.49	UNKNOWN	ABSENT	ABSENT	NO	NO
1.04.029.002	DOLJESTI	NE	RURAL	77	>60	M	163	72	27.1	ABSENT	ABSENT	NO	NO	NO	0.0127	114	8.6	64	13.4	3.6	1.12	99.01	NO	ABSENT	ABSENT	YES	NO
1.04.029.003	DOLJESTI	NE	RURAL	38	< 40 ?	M	175	57	18.61	ABSENT	ABSENT	NO	YES	NO	0.0086	67	2.1	75	2.8	4.4	0.76	67.18	NO	ABSENT	ABSENT	NO	NO
1.04.029.004	DOLJESTI	NE	RURAL	67	>60	F	159	74	29.27	ABSENT	ABSENT	NO	NO	NO	0.0094	129	2.5	74	3.4	3.4	0.83	73.37	NO	ABSENT	ABSENT	NO	NO
1.04.029.005	DOLJESTI	NE	RURAL	29	< 40 ?	M	184	65	19.2	ABSENT	ABSENT	NO	YES	NO	0.0099	103	10.1	313	3.2	4.5	0.88	77.79	NO	ABSENT	ABSENT	NO	NO
1.04.029.006	DOLJESTI	NE	RURAL	28	< 40 ?	F	160	53	20.7	ABSENT	PRESENT	NO	YES	NO	0.0078	200	2	83	2.4	3.7	0.69	61	NO	ABSENT	ABSENT	NO	NO
1.04.029.007	DOLJESTI	NE	RURAL	46	40-60	M	169	80	28.01	ABSENT	PRESENT	YES	NO	NO	0.0092	168	14.5	269	5.4	4.6	0.81	71.6	NO	ABSENT	ABSENT	YES	NO
1.04.029.008	DOLJESTI	NE	RURAL	44	40-60	F	165	83	30.49	PRESENT	PRESENT	NO	NO	NO	0.0076	110	3.5	93	3.8	4.5	0.67	59.23	NO	ABSENT	ABSENT	NO	NO
1.04.029.010	DOLJESTI	NE	RURAL	24	< 40 ?	M	167	59	21.16	ABSENT	PRESENT	NO	NO	NO	0.0069	180	10.1	204	5	4	0.61	53.92	NO	ABSENT	ABSENT	NO	NO
1.04.029.011	DOLJESTI	NE	RURAL	39	< 40 ?	M	180	69	21.3	ABSENT	PRESENT	YES	NO	NO	0.0071	88	28	135	20.7	6.2	0.63	55.69	NO	ABSENT	ABSENT	NO	NO
1.04.029.012	DOLJESTI	NE	RURAL	31	< 40 ?	F	168	52	18.42	ABSENT	ABSENT	NO	YES	NO	0.0077	13	5.9	85	6.9	2.5	0.68	60.11	NO	ABSENT	ABSENT	NO	NO
1.04.029.013	DOLJESTI	NE	RURAL	47	40-60	F	165	104	38.2	PRESENT	ABSENT	YES	NO	YES	0.0064	61	1.5	55	2.7	3	0.57	50.39	NO	ABSENT	ABSENT	NO	NO
1.04.029.014	DOLJESTI	NE	RURAL	76	>60	F	155	62	25.81	ABSENT	ABSENT	YES	NO	YES	0.0067	100	7.7	133	5.8	2.5	0.59	52.16	NO	ABSENT	ABSENT	NO	NO
1.05.001.001	SUCEAVA	NE	URBAN	23	< 40 ?	M	166	70	25.4	ABSENT	PRESENT	NO	YES	NO	0.0104	113	3.4	177	1.9	5.5	0.92	81.33	NO	ABSENT	ABSENT	YES	NO
1.05.001.002	SUCEAVA	NE	URBAN	34	< 40 ?	M	179	88.7	27.68	ABSENT	ABSENT	YES	NO	NO	0.0095	134	3	103	2.9	5.1	0.84	74.26	NO	ABSENT	ABSENT	YES	NO
1.05.001.004	SUCEAVA	NE	URBAN	33	< 40 ?	M	176	87	28.09	ABSENT	ABSENT	YES	NO	NO	0.0127	82	4.5	144	3.1	6	1.12	99.01	NO	ABSENT	ABSENT	NO	NO
1.05.001.005	SUCEAVA	NE	URBAN	77	>60	M	167	80	28.69	ABSENT	PRESENT	NO	YES	NO	0.0115	86	2.8	114	2.5	6.6	1.02	90.17	NO	.	ABSENT	.	0
1.05.001.006	SUCEAVA	NE	URBAN	41	40-60	M	177	81	25.85	ABSENT	ABSENT	YES	NO	YES	0.0095	150	8.8	200	4.4	4.4	0.84	74.26	NO	ABSENT	ABSENT	NO	NO
1.05.001.007	SUCEAVA	NE	URBAN	28	< 40 ?	F	163	60	22.58	ABSENT	ABSENT	NO	YES	NO	0.0057	66	17.4	157	11.1	5.1	0.5	44.2	NO	ABSENT	ABSENT	YES	NO
1.05.001.008	SUCEAVA	NE	URBAN	78	>60	F	161	90	34.72	PRESENT	ABSENT	YES	YES	NO	0.0089	51	1.5	28	5.4	5.4	0.79	69.84	NO	ABSENT	ABSENT	NO	NO	0.89
1.05.001.009	SUCEAVA	NE	URBAN	75	>60	F	148	50	22.83	ABSENT	ABSENT	YES	NO	NO	0.0071	125	2.3	64	3.6	3.4	0.63	55.69	NO	ABSENT	ABSENT	NO	NO
1.05.001.010	SUCEAVA	NE	URBAN	31	< 40 ?	M	177	83.5	26.65	ABSENT	ABSENT	NO	NO	NO	0.0098	68	13.2	386	3.4	5.1	0.87	76.91	NO	ABSENT	ABSENT	NO	NO
1.05.001.011	SUCEAVA	NE	URBAN	78	>60	M	168	84	29.76	ABSENT	PRESENT	YES	NO	NO	0.0114	96	7.7	166	4.6	4.2	1.01	89.28	NO	ABSENT	ABSENT	NO	NO
1.05.001.012	SUCEAVA	NE	URBAN	50	40-60	M	170	65.4	22.63	ABSENT	PRESENT	NO	YES	NO	0.0099	223	7.3	189	3.9	5.4	0.88	77.79	NO	ABSENT	ABSENT	NO	NO
1.05.001.013	SUCEAVA	NE	URBAN	56	40-60	M	164	93	34.58	PRESENT	ABSENT	YES	NO	YES	0.0098	104	3.4	193	1.8	7.3	0.87	76.91	NO	ABSENT	ABSENT	YES	NO	0.71
1.05.001.014	SUCEAVA	NE	URBAN	51	40-60	F	160	74.5	29.1	ABSENT	ABSENT	YES	NO	NO	0.0062	44	2.8	81	3.5	3.5	0.55	48.62	NO	ABSENT	ABSENT	NO	NO
1.05.001.015	SUCEAVA	NE	URBAN	39	< 40 ?	F	160	45	17.58	ABSENT	ABSENT	NO	NO	NO	0.0077	176	1.9	47	4	3.3	0.68	60.11	NO	ABSENT	ABSENT	NO	NO
1.05.001.016	SUCEAVA	NE	URBAN	42	40-60	M	180	92	28.4	ABSENT	ABSENT	YES	NO	NO	0.0127	70	3.7	180	2.1	6.7	1.12	99.01	NO	ABSENT	ABSENT	NO	NO
1.05.001.017	SUCEAVA	NE	URBAN	33	< 40 ?	F	161	90	34.72	PRESENT	ABSENT	YES	NO	NO	0.0062	56	6	33	18.2	2.9	0.55	48.62	NO	ABSENT	ABSENT	YES	NO
1.05.001.018	SUCEAVA	NE	URBAN	63	>60	M	156	85	34.93	PRESENT	ABSENT	NO	NO	NO	0.0107	47	8.2	76	10.8	6.4	0.95	83.98	NO	ABSENT	ABSENT	YES	NO
1.05.001.019	SUCEAVA	NE	URBAN	43	40-60	M	175	110	35.92	PRESENT	ABSENT	YES	NO	NO	0.011	187	4.4	210	2.1	6.2	0.97	85.75	NO	ABSENT	ABSENT	NO	NO
1.05.001.020	SUCEAVA	NE	URBAN	41	40-60	F	166	100	36.29	PRESENT	ABSENT	NO	NO	NO	0.0076	146	3.7	140	2.6	2.9	0.67	59.23	NO	ABSENT	ABSENT	NO	NO
1.05.001.021	SUCEAVA	NE	URBAN	44	40-60	F	160	96	37.5	PRESENT	ABSENT	NO	NO	NO	0.0082	96	4	130	3.1	4.8	0.73	64.53	NO	ABSENT	ABSENT	YES	NO
1.05.001.022	SUCEAVA	NE	URBAN	34	< 40 ?	M	168	100	35.43	PRESENT	ABSENT	YES	NO	NO	0.0108	172	8.9	168	5.3	6	0.96	84.86	NO	ABSENT	ABSENT	NO	NO
1.05.001.023	SUCEAVA	NE	URBAN	35	< 40 ?	F	159	48	18.99	ABSENT	PRESENT	NO	YES	NO	0.0063	78	22.2	286	7.8	2.3	0.56	49.5	NO	ABSENT	ABSENT	NO	NO
1.05.049.001	DUMBRAVENI	NE	RURAL	33	< 40 ?	F	164	64	23.8	ABSENT	ABSENT	NO	NO	NO	0.0075	150	3.8	120	3.2	3.3	0.66	58.34	NO	ABSENT	ABSENT	NO	NO
1.05.049.002	DUMBRAVENI	NE	RURAL	24	< 40 ?	F	160	56	21.88	ABSENT	ABSENT	NO	YES	YES	0.0099	110	4.7	221	2.1	5.1	0.88	77.79	NO	ABSENT	ABSENT	YES	NO
1.05.049.003	DUMBRAVENI	NE	RURAL	31	< 40 ?	F	165	79	29.02	ABSENT	ABSENT	NO	YES	NO	0.0096	160	3.2	179	1.8	3.4	0.85	75.14	NO	ABSENT	ABSENT	NO	NO
1.05.049.004	DUMBRAVENI	NE	RURAL	72	>60	M	178	110.3	34.81	PRESENT	ABSENT	YES	NO	YES	0.0113	106	13.6	92	14.8	4.8	1	88.4	.	ABSENT	ABSENT	YES	NO
1.05.049.007	DUMBRAVENI	NE	RURAL	80	>60	F	160	79	30.86	PRESENT	ABSENT	YES	NO	NO	0.0069	108	3.3	33	10	3.7	0.61	53.92	NO	ABSENT	ABSENT	NO	NO	0.62
1.05.049.008	DUMBRAVENI	NE	RURAL	49	40-60	M	173	120	40.09	PRESENT	ABSENT	NO	NO	YES	0.0119	112	27.5	103	26.7	6.9	1.05	92.82	NO	ABSENT	ABSENT	NO	NO
1.05.049.009	DUMBRAVENI	NE	RURAL	68	>60	F	151	95	41.66	PRESENT	ABSENT	YES	YES	NO	0.0079	32	2.4	34	7.1	6.7	0.7	61.88	NO	ABSENT	ABSENT	YES	NO
1.05.049.010	DUMBRAVENI	NE	RURAL	41	40-60	F	160	85	33.2	PRESENT	ABSENT	NO	NO	NO	0.0069	53	1.3	43	3	3	0.61	53.92	.	ABSENT	ABSENT	NO	NO
1.05.049.011	DUMBRAVENI	NE	RURAL	45	40-60	F	159	85	33.62	PRESENT	ABSENT	YES	NO	NO	0.0067	249	13.8	109	12.7	4.3	0.59	52.16	NO	ABSENT	ABSENT	YES	NO
1.05.049.012	DUMBRAVENI	NE	RURAL	31	< 40 ?	F	169	114	39.91	PRESENT	ABSENT	NO	YES	YES	0.0064	137	10.4	199	5.2	5	0.57	50.39	NO	ABSENT	ABSENT	NO	NO
1.05.049.013	DUMBRAVENI	NE	RURAL	41	40-60	M	174	100	33.03	PRESENT	ABSENT	NO	YES	NO	0.0115	142	6.4	248	2.6	6.2	1.02	90.17	NO	ABSENT	ABSENT	NO	NO
1.05.049.014	DUMBRAVENI	NE	RURAL	78	>60	M	167	81	29.04	ABSENT	ABSENT	YES	NO	NO	0.0104	188	2	109	1.8	4.2	0.92	81.33	NO	ABSENT	ABSENT	NO	NO	0.85
1.05.049.015	DUMBRAVENI	NE	RURAL	49	40-60	M	168	81.7	28.95	ABSENT	PRESENT	NO	NO	NO	0.0096	233	4.4	168	2.6	5.3	0.85	75.14	NO	ABSENT	ABSENT	NO	NO
1.05.049.016	DUMBRAVENI	NE	RURAL	21	< 40 ?	M	167	74.8	26.82	ABSENT	ABSENT	NO	NO	NO	0.0092	42	5.2	134	3.9	5.4	0.81	71.6	NO	ABSENT	ABSENT	YES	NO
1.05.049.017	DUMBRAVENI	NE	RURAL	65	>60	M	178	84	26.51	ABSENT	ABSENT	YES	YES	NO	0.0101	243	4.9	166	3	3.6	0.89	78.68	NO	ABSENT	ABSENT	YES	NO
1.05.049.018	DUMBRAVENI	NE	RURAL	43	40-60	M	173	80.8	27	ABSENT	PRESENT	YES	NO	NO	0.0103	102	14.1	221	6.4	5	0.91	80.44	NO	ABSENT	ABSENT	NO	NO
1.05.049.019	DUMBRAVENI	NE	RURAL	18	< 40 ?	M	178	77.1	24.33	ABSENT	PRESENT	NO	YES	NO	0.0093	110	55.2	311	17.7	6	0.82	72.49	NO	ABSENT	ABSENT	NO	NO
1.05.049.020	DUMBRAVENI	NE	RURAL	28	< 40 ?	M	181	96.8	29.55	ABSENT	PRESENT	NO	YES	NO	0.008	79	5.5	152	3.6	5.3	0.71	62.76	NO	ABSENT	ABSENT	YES	NO
1.05.049.021	DUMBRAVENI	NE	RURAL	29	< 40 ?	M	183	97	28.96	ABSENT	ABSENT	NO	YES	YES	0.009	134	8.4	210	4	5.9	0.8	70.72	NO	ABSENT	ABSENT	NO	NO
1.05.049.022	DUMBRAVENI	NE	RURAL	36	< 40 ?	M	182	80	24.15	ABSENT	ABSENT	YES	NO	NO	0.009	114	13.2	293	4.5	6	0.8	70.72	NO	ABSENT	ABSENT	YES	NO
1.05.049.023	DUMBRAVENI	NE	RURAL	39	< 40 ?	F	157	59	23.94	ABSENT	ABSENT	NO	YES	NO	0.009	91	2.1	87	2.4	3.4	0.8	70.72	NO	ABSENT	ABSENT	YES	NO
1.06.002.001	VASLUI	NE	URBAN	43	40-60	M	168	84	29.76	ABSENT	ABSENT	YES	NO	YES	0.0084	158	70.7	102	69.3	5.3	0.74	65.42	NO	ABSENT	ABSENT	NO	NO	0.68
1.06.002.002	VASLUI	NE	URBAN	26	< 40 ?	F	162	60	22.86	ABSENT	ABSENT	YES	YES	YES	0.0073	60	6.8	149	4.6	3.7	0.65	57.46	NO	ABSENT	ABSENT	NO	NO	0.44
1.06.002.003	VASLUI	NE	URBAN	31	< 40 ?	M	176	76	24.54	ABSENT	ABSENT	NO	YES	NO	0.0122	66	6.2	260	2.4	5	1.08	95.47	NO	ABSENT	ABSENT	NO	NO	0.52
1.06.002.004	VASLUI	NE	URBAN	77	>60	M	162	63	24.01	ABSENT	PRESENT	YES	NO	YES	0.0116	98	53	98	54.1	7.5	1.03	91.05	NO	ABSENT	ABSENT	YES	NO	1.05
1.06.002.005	VASLUI	NE	URBAN	48	40-60	F	168	85	30.12	PRESENT	PRESENT	YES	NO	YES	0.0087	61	1.6	74	2.2	6.7	0.77	68.07	NO	ABSENT	ABSENT	NO	NO	0.72
1.06.086.001	ZORLENI	NE	RURAL	18	< 40 ?	M	170	54	18.69	ABSENT	ABSENT	NO	YES	NO	0.0096	182	7.4	130	5.7	5.1	0.85	75.14	NO	ABSENT	ABSENT	NO	NO	0.6
1.06.086.002	ZORLENI	NE	RURAL	78	>60	M	180	85	26.23	ABSENT	ABSENT	NO	YES	NO	0.0116	174	101.5	219	46.3	3.5	1.03	91.05	NO	.	ABSENT	.	0	1.06
1.06.086.003	ZORLENI	NE	RURAL	75	>60	F	161	105	40.51	PRESENT	ABSENT	YES	NO	NO	0.009	121	4.1	28	14.6	5.3	0.8	70.72	YES	ABSENT	PRESENT	NO	NO	0.83
1.06.086.004	ZORLENI	NE	RURAL	36	< 40 ?	F	158	61	24.44	ABSENT	ABSENT	NO	NO	NO	0.0069	101	0.5	57	0.9	3.1	0.61	53.92	NO	ABSENT	ABSENT	NO	NO	0.53
1.06.086.005	ZORLENI	NE	RURAL	23	< 40 ?	F	150	77	34.22	PRESENT	ABSENT	NO	NO	NO	0.0063	104	6.2	154	4	4.6	0.56	49.5	YES	ABSENT	PRESENT	NO	NO	0.49
1.06.086.006	ZORLENI	NE	RURAL	58	40-60	F	157	90	36.51	PRESENT	ABSENT	YES	NO	NO	0.0055	207	4	121	3.3	2.8	0.49	43.32	.	ABSENT	ABSENT	NO	NO	0.64
1.06.086.007	ZORLENI	NE	RURAL	30	< 40 ?	F	152	88	38.09	PRESENT	ABSENT	NO	NO	YES	0.0067	123	3.3	162	2	3.6	0.59	52.16	NO	ABSENT	ABSENT	NO	NO	0.56
1.06.086.008	ZORLENI	NE	RURAL	38	< 40 ?	M	176	85.5	27.6	ABSENT	PRESENT	NO	NO	NO	0.0084	103	1.6	141	1.1	5.3	0.74	65.42	NO	ABSENT	ABSENT	NO	NO	0.58
1.06.086.009	ZORLENI	NE	RURAL	47	40-60	F	159	68	26.9	ABSENT	ABSENT	YES	YES	YES	0.0085	64	1.7	79	2.2	6.3	0.75	66.3	NO	ABSENT	ABSENT	NO	NO	0.55
1.06.086.010	ZORLENI	NE	RURAL	33	< 40 ?	M	173	68	22.72	ABSENT	PRESENT	YES	YES	NO	0.0093	76	0.7	65	1.1	5	0.82	72.49	NO	ABSENT	ABSENT	YES	NO	0.57
1.06.086.012	ZORLENI	NE	RURAL	68	>60	M	167	95	34.06	PRESENT	ABSENT	YES	NO	NO	0.0119	153	0.9	104	0.9	7.1	1.05	92.82	NO	ABSENT	ABSENT	NO	NO	0.91
1.06.086.013	ZORLENI	NE	RURAL	38	< 40 ?	F	159	49.1	19.42	ABSENT	ABSENT	NO	YES	NO	0.0053	80	3.7	36	10.3	2.1	0.47	41.55	NO	ABSENT	ABSENT	NO	NO
1.06.086.014	ZORLENI	NE	RURAL	19	< 40 ?	M	184	105	31.01	PRESENT	PRESENT	YES	NO	NO	0.0104	157	78.5	326	24.1	6	0.92	81.33	NO	ABSENT	ABSENT	NO	NO	0.49
1.06.086.015	ZORLENI	NE	RURAL	44	40-60	F	160	62	24.22	ABSENT	ABSENT	YES	NO	YES	0.0075	73	20.6	216	9.5	3.1	0.66	58.34	NO	ABSENT	ABSENT	NO	NO	0.52
2.01.001.001	BRAILA	SE	URBAN	41	40-60	M	169.5	67	23.32	ABSENT	PRESENT	NO	YES	NO	0.0112	95	4.7	211	2.2	5.2	0.99	87.52	NO	ABSENT	ABSENT	UNKNOWN	NO	0.58
2.01.001.002	BRAILA	SE	URBAN	54	40-60	M	174	100	33.03	PRESENT	ABSENT	NO	NO	YES	0.0101	123	7.2	164	4.4	7.2	0.89	78.68	NO	ABSENT	ABSENT	NO	NO	0.71
2.01.001.003	BRAILA	SE	URBAN	76	>60	F	147.5	84	38.61	PRESENT	ABSENT	YES	NO	YES	0.0103	131	3.8	124	3.1	4.4	0.91	80.44	NO	ABSENT	ABSENT	NO	NO	0.77
2.01.001.004	BRAILA	SE	URBAN	79	>60	F	143	68	33.25	PRESENT	ABSENT	YES	NO	NO	0.0092	155	3.7	52	7.1	5.2	0.81	71.6	NO	ABSENT	ABSENT	UNKNOWN	NO	0.76
2.01.001.005	BRAILA	SE	URBAN	76	>60	M	171	79	27.02	ABSENT	ABSENT	NO	NO	NO	0.0105	100	7.5	59	12.7	6.4	0.93	82.21	NO	ABSENT	ABSENT	NO	NO	1.01
2.01.001.006	BRAILA	SE	URBAN	79	>60	M	163.5	90	33.67	PRESENT	ABSENT	YES	NO	NO	0.0105	206	5.9	159	3.7	4.9	0.93	82.21	NO	ABSENT	ABSENT	NO	NO	0.97
2.01.001.007	BRAILA	SE	URBAN	44	40-60	F	162.2	66	25.09	ABSENT	ABSENT	NO	YES	NO	0.0075	150	7.7	242	3.2	3.1	0.66	58.34	NO	ABSENT	ABSENT	NO	NO	0.59
2.01.001.008	BRAILA	SE	URBAN	28	< 40 ?	F	163	100	37.64	PRESENT	ABSENT	YES	YES	YES	0.0087	84	3.4	140	2.4	4.2	0.77	68.07	NO	ABSENT	ABSENT	NO	NO	0.52
2.01.001.009	BRAILA	SE	URBAN	69	>60	F	157	86	34.89	PRESENT	ABSENT	YES	NO	YES	0.0068	35	3	20	15	6.5	0.6	53.04	NO	ABSENT	ABSENT	NO	NO	0.68
2.01.001.010	BRAILA	SE	URBAN	74	>60	M	168	77	27.28	ABSENT	ABSENT	YES	YES	NO	0.0104	59	3	74	4.1	4.8	0.92	81.33	NO	ABSENT	ABSENT	NO	NO	0.85
2.01.001.011	BRAILA	SE	URBAN	52	40-60	M	186	87.3	25.23	ABSENT	ABSENT	NO	NO	YES	0.0108	174	3	82	3.7	5.5	0.96	84.86	NO	ABSENT	ABSENT	NO	NO	0.69
2.01.001.014	BRAILA	SE	URBAN	29	< 40 ?	M	178	89	28.09	ABSENT	PRESENT	NO	YES	YES	0.0112	50	18.1	178	10.2	5.5	0.99	87.52	NO	ABSENT	ABSENT	NO	NO	0.53
2.01.001.015	BRAILA	SE	URBAN	28	< 40 ?	F	152	44.2	19.13	ABSENT	ABSENT	NO	YES	NO	0.0064	108	14.7	218	6.7	4.3	0.57	50.39	NO	ABSENT	ABSENT	NO	NO	0.44
2.01.001.016	BRAILA	SE	URBAN	56	40-60	F	172	98.8	33.4	PRESENT	ABSENT	NO	YES	YES	0.008	76	18.9	217	8.7	4.5	0.71	62.76	NO	ABSENT	ABSENT	NO	NO	0.56
2.01.001.017	BRAILA	SE	URBAN	50	40-60	F	159	74.5	29.47	ABSENT	ABSENT	NO	YES	YES	0.0064	142	3	140	2.1	3.9	0.57	50.39	NO	ABSENT	ABSENT	YES	NO	0.69
2.01.043.001	VIZIRU	SE	RURAL	64	>60	F	152	52.4	22.68	ABSENT	ABSENT	YES	NO	NO	0.0055	178	51.4	59	87.1	3.2	0.49	43.32	.	ABSENT	ABSENT	NO	NO	0.73
2.01.043.002	VIZIRU	SE	RURAL	39	< 40 ?	F	156.5	86.6	35.36	PRESENT	ABSENT	NO	YES	NO	0.0066	74	14.2	276	5.1	4.2	0.58	51.27	NO	ABSENT	ABSENT	NO	NO	0.52
2.01.043.003	VIZIRU	SE	RURAL	77	>60	M	168	76	26.93	ABSENT	ABSENT	NO	NO	YES	0.0095	93	25.2	113	22.3	6.3	0.84	74.26	.	ABSENT	ABSENT	NO	NO	1.14
2.01.043.004	VIZIRU	SE	RURAL	39	< 40 ?	F	166	91	33.02	PRESENT	ABSENT	NO	YES	YES	0.0084	114	3	125	2.4	4.5	0.74	65.42	NO	ABSENT	ABSENT	NO	NO	0.59
2.01.043.005	VIZIRU	SE	RURAL	70	>60	M	180	130.9	40.4	PRESENT	ABSENT	NO	NO	NO	0.0079	105	3	102	2.9	6.4	0.7	61.88	.	ABSENT	ABSENT	NO	NO	0.59
2.01.043.006	VIZIRU	SE	RURAL	76	>60	F	152	57.6	24.93	ABSENT	ABSENT	NO	NO	NO	0.0069	202	3	58	5.2	4.3	0.61	53.92	.	ABSENT	ABSENT	NO	NO	0.89
2.01.043.007	VIZIRU	SE	RURAL	68	>60	F	155	76.1	31.68	PRESENT	ABSENT	NO	YES	NO	0.0094	63	3	38	7.9	4	0.83	73.37	NO	ABSENT	ABSENT	NO	NO	0.72
2.01.043.008	VIZIRU	SE	RURAL	60	>60	M	172	102	34.48	PRESENT	ABSENT	NO	NO	YES	0.007	102	4.5	44	10.2	5.7	0.62	54.81	.	ABSENT	ABSENT	NO	NO	0.7
2.01.043.009	VIZIRU	SE	RURAL	31	< 40 ?	M	171	77	26.33	ABSENT	ABSENT	NO	NO	YES	0.0112	89	3	114	2.6	4.7	0.99	87.52	NO	ABSENT	ABSENT	YES	NO	0.57
2.01.043.010	VIZIRU	SE	RURAL	69	>60	F	153	63	26.91	ABSENT	ABSENT	YES	NO	NO	0.0068	79	3	51	5.9	3.2	0.6	53.04	NO	ABSENT	ABSENT	NO	NO	0.78
2.01.043.011	VIZIRU	SE	RURAL	40	40-60	M	178	88.5	27.93	ABSENT	ABSENT	YES	YES	YES	0.0123	116	6.3	292	2.2	6.4	1.09	96.36	NO	ABSENT	ABSENT	NO	NO	0.63
2.01.043.012	VIZIRU	SE	RURAL	48	40-60	M	179	90	28.09	ABSENT	ABSENT	YES	NO	YES	0.0113	216	10.8	178	6.1	4.5	1	88.4	.	ABSENT	ABSENT	YES	NO	1.02
2.01.043.013	VIZIRU	SE	RURAL	33	< 40 ?	F	151.5	56.5	24.62	ABSENT	ABSENT	NO	YES	YES	0.0081	37	3	61	4.9	3.2	0.72	63.65	NO	ABSENT	ABSENT	YES	NO	0.45
2.01.043.014	VIZIRU	SE	RURAL	39	< 40 ?	M	170.5	84.4	29.03	ABSENT	ABSENT	YES	NO	NO	0.0116	135	3.7	111	3.3	6.4	1.03	91.05	NO	.	ABSENT	.	0	0.51
2.01.043.015	VIZIRU	SE	RURAL	19	< 40 ?	F	168	57	20.2	ABSENT	ABSENT	NO	YES	NO	0.0061	0	3	96	3.1	2.7	0.54	47.74	NO	ABSENT	ABSENT	NO	NO	0.47
2.01.043.016	VIZIRU	SE	RURAL	24	< 40 ?	M	168	66.4	23.53	ABSENT	ABSENT	NO	YES	NO	0.0115	136	3	174	1.7	5.3	1.02	90.17	NO	.	ABSENT	.	0	0.44
2.01.043.017	VIZIRU	SE	RURAL	23	< 40 ?	M	176	58.2	18.79	ABSENT	ABSENT	NO	YES	YES	0.0071	112	3	66	4.5	3.9	0.63	55.69	NO	ABSENT	ABSENT	YES	NO	0.54
2.01.043.018	VIZIRU	SE	RURAL	47	40-60	F	161	66	25.46	ABSENT	ABSENT	YES	YES	NO	0.0081	60	3	63	4.8	3.2	0.72	63.65	NO	.	ABSENT	.	.	0.78
2.01.043.019	VIZIRU	SE	RURAL	39	< 40 ?	M	170	63.4	21.94	ABSENT	ABSENT	YES	YES	NO	0.008	145	28.5	177	16.1	3.4	0.71	62.76	NO	.	ABSENT	.	.	0.66
2.01.043.020	VIZIRU	SE	RURAL	78	>60	M	166	100.1	36.33	PRESENT	ABSENT	NO	YES	NO	0.0075	164	0.9	69	1.3	4.4	0.66	58.34	UNKNOWN	.	ABSENT	.	0	1
2.01.043.021	VIZIRU	SE	RURAL	32	< 40 ?	M	160	69.2	27.03	ABSENT	PRESENT	NO	NO	YES	0.0116	46	3	252	1.2	6.3	1.03	91.05	NO	.	ABSENT	.	0	0.58
2.01.043.022	VIZIRU	SE	RURAL	77	>60	M	173	99.3	33.18	PRESENT	ABSENT	YES	NO	NO	0.0103	196	9	169	5.3	6	0.91	80.44	NO	ABSENT	ABSENT	NO	NO	1
2.01.043.023	VIZIRU	SE	RURAL	41	40-60	M	180	116	35.8	PRESENT	PRESENT	NO	NO	NO	0.0106	203	3	151	2	5.9	0.94	83.1	NO	.	ABSENT	.	0
2.01.043.024	VIZIRU	SE	RURAL	46	40-60	M	178	137.7	43.46	PRESENT	PRESENT	YES	YES	YES	0.0084	167	8.9	137	6.5	5.2	0.74	65.42	UNKNOWN	ABSENT	ABSENT	NO	NO
2.01.043.025	VIZIRU	SE	RURAL	48	40-60	M	175	96.6	31.54	PRESENT	PRESENT	NO	YES	NO	0.0099	161	3.4	174	2	4.4	0.88	77.79	NO	ABSENT	ABSENT	YES	NO	0.66
2.01.043.026	VIZIRU	SE	RURAL	51	40-60	F	164.5	65.6	24.24	ABSENT	ABSENT	YES	NO	YES	0.0073	79	8.7	166	5.2	3.7	0.65	57.46	NO	ABSENT	ABSENT	NO	NO	0.66
2.01.043.027	VIZIRU	SE	RURAL	50	40-60	F	162	50.7	19.32	ABSENT	ABSENT	NO	YES	NO	0.0087	138	19.4	364	5.3	4.8	0.77	68.07	NO	.	ABSENT	.	0	0.43
2.01.043.028	VIZIRU	SE	RURAL	46	40-60	M	179.5	121.4	37.68	PRESENT	ABSENT	NO	YES	NO	0.0072	99	5.1	169	3	6.9	0.64	56.58	NO	ABSENT	ABSENT	NO	NO	0.62
2.01.043.029	VIZIRU	SE	RURAL	18	< 40 ?	F	169	59.7	20.9	ABSENT	ABSENT	NO	YES	YES	0.0066	130	4.3	97	4.4	3.9	0.58	51.27	NO	.	ABSENT	.	.	0.48
2.02.001.001	BUZAU	SE	URBAN	66	>60	M	180	66	20.37	ABSENT	PRESENT	NO	NO	NO	0.0089	165	14.3	212	6.7	4.4	0.79	69.84	NO	ABSENT	ABSENT	NO	NO	0.75
2.02.001.002	BUZAU	SE	URBAN	49	40-60	F	170	100	34.6	PRESENT	ABSENT	YES	YES	NO	0.0082	55	9	93	9.7	6.9	0.73	64.53	UNKNOWN	ABSENT	ABSENT	NO	NO	0.62
2.02.001.004	BUZAU	SE	URBAN	72	>60	M	177	79.5	25.38	ABSENT	ABSENT	YES	NO	NO	0.0089	180	8	105	7.6	5.9	0.79	69.84	NO	ABSENT	ABSENT	NO	NO	0.76
2.02.001.005	BUZAU	SE	URBAN	36	< 40 ?	F	176	76	24.54	ABSENT	ABSENT	NO	NO	NO	0.0094	87	12.4	92	13.5	4.9	0.83	73.37	NO	ABSENT	ABSENT	NO	NO	0.51
2.02.001.006	BUZAU	SE	URBAN	41	40-60	F	170	73	25.26	ABSENT	PRESENT	NO	YES	NO	0.0069	131	3	124	2.4	3.7	0.61	53.92	NO	ABSENT	ABSENT	NO	NO	0.6
2.02.001.007	BUZAU	SE	URBAN	61	>60	M	167	72	25.82	ABSENT	ABSENT	YES	NO	NO	0.0097	199	3	177	1.7	4.2	0.86	76.02	NO	ABSENT	ABSENT	YES	NO	0.54
2.02.001.008	BUZAU	SE	URBAN	38	< 40 ?	M	182	105	31.7	PRESENT	ABSENT	YES	NO	NO	0.0146	172	18.1	217	8.3	7	1.29	114.04	NO	ABSENT	ABSENT	YES	NO	0.76
2.02.001.009	BUZAU	SE	URBAN	44	40-60	M	170	80.6	27.89	ABSENT	ABSENT	YES	NO	NO	0.0099	90	3	94	3.2	5.2	0.88	77.79	NO	ABSENT	ABSENT	NO	NO	0.51
2.02.001.010	BUZAU	SE	URBAN	33	< 40 ?	F	162	76	28.96	ABSENT	ABSENT	YES	YES	NO	0.0076	109	3	85	3.5	4.3	0.67	59.23	NO	ABSENT	ABSENT	NO	NO	0.53
2.02.001.011	BUZAU	SE	URBAN	61	>60	F	170	86	29.76	ABSENT	ABSENT	NO	NO	NO	0.0084	71	3	57	5.3	3.9	0.74	65.42	NO	ABSENT	ABSENT	NO	NO	0.74
2.02.001.012	BUZAU	SE	URBAN	80	>60	M	168	96	34.01	PRESENT	ABSENT	YES	NO	NO	0.0122	164	23.3	92	25.3	4.1	1.08	95.47	NO	ABSENT	ABSENT	NO	NO	0.74
2.02.001.013	BUZAU	SE	URBAN	27	< 40 ?	M	170	53.4	18.48	ABSENT	PRESENT	YES	YES	NO	0.0107	82	65.8	370	17.8	5	0.95	83.98	NO	ABSENT	ABSENT	YES	NO	0.51
2.02.001.014	BUZAU	SE	URBAN	65	>60	F	160	81	31.64	PRESENT	ABSENT	YES	NO	NO	0.0079	82	15.5	253	6.1	4.9	0.7	61.88	NO	ABSENT	ABSENT	NO	NO	0.78
2.02.001.015	BUZAU	SE	URBAN	48	40-60	M	180	106	32.72	PRESENT	PRESENT	YES	NO	YES	0.0105	191	3	96	3.1	4.9	0.93	82.21	NO	ABSENT	ABSENT	NO	NO	0.57
2.02.001.016	BUZAU	SE	URBAN	19	< 40 ?	F	162	56	21.34	ABSENT	ABSENT	NO	YES	YES	0.008	39	13.1	224	5.8	5.6	0.71	62.76	NO	ABSENT	ABSENT	YES	NO	0.47
2.02.001.017	BUZAU	SE	URBAN	21	< 40 ?	M	183	74	22.1	ABSENT	PRESENT	NO	YES	NO	0.0097	147	10.5	305	3.4	3.1	0.86	76.02	NO	ABSENT	ABSENT	NO	NO	0.61
2.02.001.018	BUZAU	SE	URBAN	53	40-60	F	155	55.6	23.14	ABSENT	ABSENT	YES	YES	NO	0.0079	112	3	58	5.2	3.5	0.7	61.88	NO	ABSENT	ABSENT	YES	NO	0.61
2.02.001.019	BUZAU	SE	URBAN	60	>60	F	166	69	25.04	ABSENT	ABSENT	NO	YES	NO	0.011	126	3	60	5	4.4	0.97	85.75	NO	ABSENT	ABSENT	NO	NO	0.6
2.02.001.020	BUZAU	SE	URBAN	34	< 40 ?	F	156	87	35.75	PRESENT	ABSENT	NO	YES	NO	0.0064	41	3	54	5.6	7.4	0.57	50.39	NO	ABSENT	ABSENT	NO	NO	0.6
2.02.001.021	BUZAU	SE	URBAN	31	< 40 ?	F	169	58.8	20.59	ABSENT	ABSENT	NO	YES	NO	0.0086	76	3.3	264	1.3	4.2	0.76	67.18	NO	ABSENT	ABSENT	NO	NO	0.57
2.02.001.022	BUZAU	SE	URBAN	49	40-60	M	167	78.8	28.25	ABSENT	ABSENT	NO	NO	NO	0.0086	0	4.4	195	2.3	4	0.76	67.18	NO	ABSENT	ABSENT	NO	NO	0.47
2.02.001.023	BUZAU	SE	URBAN	76	>60	F	160	75	29.3	ABSENT	ABSENT	YES	NO	YES	0.0101	132	3	29	10.3	5.6	0.89	78.68	NO	ABSENT	ABSENT	NO	NO
2.02.001.024	BUZAU	SE	URBAN	34	< 40 ?	M	165	92	33.79	PRESENT	ABSENT	YES	NO	YES	0.0101	80	14.3	299	4.8	7.2	0.89	78.68	NO	ABSENT	ABSENT	NO	NO	0.47
2.02.001.025	BUZAU	SE	URBAN	28	< 40 ?	M	178	88	27.77	ABSENT	PRESENT	NO	YES	NO	0.0099	223	3	95	3.2	5	0.88	77.79	NO	ABSENT	ABSENT	NO	NO	0.5
2.02.001.026	BUZAU	SE	URBAN	36	< 40 ?	M	188	76	21.5	ABSENT	PRESENT	NO	YES	NO	0.0104	100	3	104	2.9	5	0.92	81.33	NO	.	ABSENT	.	0	0.46
2.02.044.001	MARACINENI	SE	RURAL	27	< 40 ?	M	175	84	27.43	ABSENT	PRESENT	NO	NO	NO	0.0112	162	12.8	273	4.7	6.6	0.99	87.52	NO	ABSENT	ABSENT	NO	NO	0.59
2.02.044.002	MARACINENI	SE	RURAL	68	>60	M	176	95	30.67	PRESENT	ABSENT	YES	YES	NO	0.0141	84	4.8	214	2.2	7	1.25	110.5	NO	ABSENT	ABSENT	NO	NO	0.55
2.02.044.003	MARACINENI	SE	RURAL	49	40-60	F	162	50	19.05	ABSENT	PRESENT	YES	NO	NO	0.0094	132	3	176	1.7	5.3	0.83	73.37	NO	ABSENT	ABSENT	NO	NO	0.8
2.02.044.004	MARACINENI	SE	RURAL	43	40-60	F	165	73.4	26.96	ABSENT	ABSENT	NO	YES	NO	0.0069	138	12.3	252	4.9	2.9	0.61	53.92	NO	ABSENT	ABSENT	NO	NO	0.69
2.02.044.005	MARACINENI	SE	RURAL	35	< 40 ?	F	161	66	25.46	ABSENT	ABSENT	NO	YES	NO	0.0076	46	6.7	211	3.2	3.5	0.67	59.23	NO	ABSENT	ABSENT	NO	NO	0.53
2.02.044.006	MARACINENI	SE	RURAL	51	40-60	F	150	77	34.22	PRESENT	ABSENT	YES	NO	YES	0.0094	191	7.3	86	8.5	3.4	0.83	73.37	NO	ABSENT	ABSENT	NO	NO	0.62
2.02.044.007	MARACINENI	SE	RURAL	64	>60	M	176	64	20.66	ABSENT	ABSENT	YES	NO	NO	0.0127	176	3	99	3	3.8	1.12	99.01	NO	ABSENT	ABSENT	NO	NO	0.69
2.02.044.008	MARACINENI	SE	RURAL	30	< 40 ?	F	174	78	25.76	ABSENT	ABSENT	NO	YES	NO	0.008	132	3	45	6.7	4.2	0.71	62.76	NO	ABSENT	ABSENT	YES	NO	0.47
2.02.044.009	MARACINENI	SE	RURAL	76	>60	M	170	83	28.72	ABSENT	ABSENT	NO	NO	NO	0.0124	171	11.2	195	5.7	4.8	1.1	97.24	NO	ABSENT	ABSENT	NO	NO	0.82
2.02.044.010	MARACINENI	SE	RURAL	76	>60	F	154	72	30.36	PRESENT	ABSENT	YES	NO	NO	0.0077	214	6.6	118	5.6	3.9	0.68	60.11	NO	ABSENT	ABSENT	NO	NO	0.96
2.02.044.011	MARACINENI	SE	RURAL	40	40-60	M	177	104	33.2	PRESENT	ABSENT	YES	NO	NO	0.0105	145	7.5	304	2.5	5.7	0.93	82.21	NO	ABSENT	ABSENT	NO	NO	0.5
2.02.044.012	MARACINENI	SE	RURAL	80	>60	F	150	48	21.33	ABSENT	ABSENT	YES	YES	YES	0.0081	188	3	64	4.7	5	0.72	63.65	NO	ABSENT	ABSENT	YES	NO	1.02
2.02.044.013	MARACINENI	SE	RURAL	28	< 40 ?	F	168	72	25.51	ABSENT	PRESENT	NO	NO	NO	0.0087	175	7.5	153	4.9	3.6	0.77	68.07	NO	ABSENT	ABSENT	YES	NO	0.51
2.02.044.014	MARACINENI	SE	RURAL	80	>60	F	150	62	27.56	ABSENT	ABSENT	YES	NO	NO	0.0114	132	3	65	4.6	5	1.01	89.28	NO	ABSENT	ABSENT	NO	NO	1
2.03.001.001	CONSTANTA	SE	URBAN	64	>60	M	166	80.7	29.29	ABSENT	PRESENT	YES	NO	NO	0.0104	107	5.3	136	3.9	5	0.92	81.33	NO	ABSENT	ABSENT	NO	NO	0.51
2.03.001.002	CONSTANTA	SE	URBAN	46	40-60	M	176	84.7	27.34	ABSENT	PRESENT	YES	NO	NO	0.0101	128	5.8	168	3.5	6.1	0.89	78.68	NO	ABSENT	ABSENT	NO	NO	0.61
2.03.001.003	CONSTANTA	SE	URBAN	64	>60	M	163	66.5	25.03	ABSENT	PRESENT	YES	NO	YES	0.0095	15	32.5	139	23.4	3.6	0.84	74.26	NO	ABSENT	ABSENT	NO	NO	0.7
2.03.001.004	CONSTANTA	SE	URBAN	79	>60	M	172	89.9	30.39	PRESENT	ABSENT	NO	NO	NO	0.0112	221	5.7	101	5.6	6.5	0.99	87.52	NO	ABSENT	ABSENT	UNKNOWN	NO	0.78
2.03.001.006	CONSTANTA	SE	URBAN	29	< 40 ?	F	162	82.9	31.59	PRESENT	PRESENT	YES	NO	NO	0.0081	49	5.5	47	11.7	5.7	0.72	63.65	NO	ABSENT	ABSENT	NO	NO	0.53
2.03.001.007	CONSTANTA	SE	URBAN	44	40-60	F	171	84.2	28.8	ABSENT	ABSENT	YES	NO	NO	0.008	173	7	217	3.2	4.7	0.71	62.76	.	ABSENT	ABSENT	NO	NO	0.71
2.03.001.008	CONSTANTA	SE	URBAN	79	>60	M	172.2	84	28.33	ABSENT	ABSENT	NO	NO	NO	0.0122	127	5.6	68	8.2	5.6	1.08	95.47	NO	ABSENT	ABSENT	NO	NO	0.8
2.03.001.009	CONSTANTA	SE	URBAN	74	>60	F	160	72.7	28.4	ABSENT	ABSENT	YES	NO	NO	0.0101	103	9.6	84	11.4	4.3	0.89	78.68	NO	ABSENT	ABSENT	NO	NO	0.79
2.03.001.010	CONSTANTA	SE	URBAN	28	< 40 ?	M	173	89.9	30.04	PRESENT	ABSENT	NO	NO	NO	0.0087	99	5.6	176	3.2	4.2	0.77	68.07	NO	ABSENT	ABSENT	NO	NO	0.56
2.03.001.011	CONSTANTA	SE	URBAN	37	< 40 ?	M	182	96.3	29.07	ABSENT	PRESENT	YES	NO	NO	0.0116	47	5.5	72	7.6	7.5	1.03	91.05	NO	.	ABSENT	.	0	0.51
2.03.001.013	CONSTANTA	SE	URBAN	42	40-60	F	161	71.3	27.51	ABSENT	PRESENT	NO	NO	NO	0.007	45	5.5	62	8.9	4.2	0.62	54.81	NO	ABSENT	ABSENT	NO	NO	0.55
2.03.001.014	CONSTANTA	SE	URBAN	44	40-60	F	160	68	26.56	ABSENT	ABSENT	NO	NO	YES	0.0079	155	5.5	189	2.9	3.8	0.7	61.88	NO	ABSENT	ABSENT	NO	NO	0.75
2.03.001.015	CONSTANTA	SE	URBAN	39	< 40 ?	F	165	60.4	22.19	ABSENT	ABSENT	YES	NO	NO	0.0067	58	5.6	83	6.7	4.7	0.59	52.16	NO	ABSENT	ABSENT	NO	NO	0.49
2.03.001.016	CONSTANTA	SE	URBAN	77	>60	F	158.7	51.8	20.57	ABSENT	ABSENT	NO	NO	NO	0.0098	77	5.4	55	9.8	5.4	0.87	76.91	NO	ABSENT	ABSENT	NO	NO	0.58
2.03.001.017	CONSTANTA	SE	URBAN	32	< 40 ?	M	172	69.5	23.49	ABSENT	ABSENT	NO	NO	NO	0.0106	184	6	215	2.8	5.6	0.94	83.1	NO	.	ABSENT	.	0	0.55
2.03.001.018	CONSTANTA	SE	URBAN	31	< 40 ?	M	172	64.2	21.7	ABSENT	PRESENT	NO	NO	NO	0.011	43	7.2	333	2.2	6.3	0.97	85.75	NO	ABSENT	ABSENT	NO	NO	0.48
2.03.001.019	CONSTANTA	SE	URBAN	36	< 40 ?	M	171	82.9	28.35	ABSENT	PRESENT	YES	NO	NO	0.0105	140	5.6	95	5.9	7	0.93	82.21	NO	ABSENT	ABSENT	NO	NO	0.57
2.03.001.020	CONSTANTA	SE	URBAN	26	< 40 ?	M	170	87.7	30.35	PRESENT	PRESENT	NO	NO	YES	0.0116	126	6.4	217	2.9	4.9	1.03	91.05	NO	ABSENT	ABSENT	NO	NO	0.57
2.03.001.021	CONSTANTA	SE	URBAN	41	40-60	M	167	78	27.97	ABSENT	PRESENT	NO	NO	NO	0.0102	99	6.6	191	3.5	7.1	0.9	79.56	NO	ABSENT	ABSENT	NO	NO	0.49
2.03.001.022	CONSTANTA	SE	URBAN	36	< 40 ?	M	168.2	58.7	20.75	ABSENT	ABSENT	NO	NO	NO	0.0106	142	5.3	175	3	3.6	0.94	83.1	NO	ABSENT	ABSENT	NO	NO	0.44
2.03.001.023	CONSTANTA	SE	URBAN	23	< 40 ?	F	176	57.5	18.56	ABSENT	ABSENT	YES	NO	NO	0.0095	41	5.9	86	6.9	5.8	0.84	74.26	NO	ABSENT	ABSENT	NO	NO	0.53
2.03.001.024	CONSTANTA	SE	URBAN	23	< 40 ?	F	171	54.3	18.57	ABSENT	PRESENT	NO	NO	NO	0.0084	66	27.2	107	25.4	4.8	0.74	65.42	NO	.	ABSENT	.	0	0.5
2.03.001.025	CONSTANTA	SE	URBAN	26	< 40 ?	M	171.9	60.8	20.58	ABSENT	ABSENT	NO	NO	YES	0.0089	174	6.4	218	2.9	5.1	0.79	69.84	NO	ABSENT	ABSENT	NO	NO	0.53
2.03.001.027	CONSTANTA	SE	URBAN	20	< 40 ?	M	172.5	63	21.17	ABSENT	PRESENT	NO	NO	YES	0.0086	243	5.3	169	3.1	3.9	0.76	67.18	NO	ABSENT	ABSENT	NO	NO	0.52
2.03.001.028	CONSTANTA	SE	URBAN	79	>60	F	159	74.3	29.39	ABSENT	ABSENT	YES	NO	NO	0.0097	127	5.6	51	11	6.5	0.86	76.02	NO	.	ABSENT	.	0	0.68
2.03.030.001	YESMPANA	SE	RURAL	20	< 40 ?	F	153	34.5	14.74	ABSENT	PRESENT	NO	NO	YES	0.0053	146	81.7	130	62.8	3.7	0.47	41.55	NO	ABSENT	ABSENT	NO	NO	0.46
2.03.030.002	YESMPANA	SE	RURAL	67	>60	M	165	84	30.85	PRESENT	ABSENT	YES	YES	NO	0.0087	37	5.6	71	7.9	8.2	0.77	68.07	NO	ABSENT	ABSENT	NO	NO	0.6
2.03.030.003	YESMPANA	SE	RURAL	75	>60	F	150	86	38.22	PRESENT	ABSENT	YES	NO	NO	0.008	129	5.6	59	9.5	5.1	0.71	62.76	NO	ABSENT	ABSENT	NO	NO	0.98
2.03.030.004	YESMPANA	SE	RURAL	40	40-60	M	175.7	83.4	27.02	ABSENT	ABSENT	YES	NO	NO	0.0107	39	5.5	35	15.7	4.4	0.95	83.98	NO	ABSENT	ABSENT	NO	NO	0.66
2.03.030.005	YESMPANA	SE	RURAL	38	< 40 ?	F	154	69.5	29.31	ABSENT	PRESENT	NO	NO	YES	0.0081	71	7.1	223	3.2	5.3	0.72	63.65	UNKNOWN	ABSENT	ABSENT	NO	NO	0.46
2.03.030.006	YESMPANA	SE	RURAL	29	< 40 ?	F	166	74	26.85	ABSENT	PRESENT	NO	YES	NO	0.0059	161	6.2	133	4.7	2.2	0.52	45.97	NO	ABSENT	ABSENT	NO	NO	0.52
2.03.030.007	YESMPANA	SE	RURAL	33	< 40 ?	F	168	50	17.72	ABSENT	PRESENT	NO	NO	NO	0.0082	91	6.1	252	2.4	3.8	0.73	64.53	NO	ABSENT	ABSENT	NO	NO	0.62
2.03.030.008	YESMPANA	SE	RURAL	32	< 40 ?	F	160	70	27.34	ABSENT	PRESENT	NO	NO	YES	0.0071	116	5.6	69	8.1	5.4	0.63	55.69	NO	ABSENT	ABSENT	NO	NO	0.7
2.03.030.009	YESMPANA	SE	RURAL	39	< 40 ?	M	176	98.5	31.8	PRESENT	ABSENT	NO	NO	NO	.	101	5.3	145	3.7	.	.	.	.	ABSENT	ABSENT	NO	NO
2.03.030.010	YESMPANA	SE	RURAL	71	>60	F	155	95	39.54	PRESENT	ABSENT	YES	NO	NO	0.0067	67	5.8	27	21.5	6.6	0.59	52.16	NO	ABSENT	ABSENT	UNKNOWN	NO	0.72
2.03.030.011	YESMPANA	SE	RURAL	72	>60	F	156	72.9	29.96	ABSENT	ABSENT	YES	NO	NO	0.0095	88	5.5	74	7.4	4.8	0.84	74.26	.	ABSENT	ABSENT	NO	NO	0.79
2.03.030.012	YESMPANA	SE	RURAL	33	< 40 ?	M	171	86	29.41	ABSENT	PRESENT	NO	NO	NO	0.0089	199	5.3	137	3.9	5.1	0.79	69.84	NO	ABSENT	ABSENT	NO	NO	0.41
2.03.030.013	YESMPANA	SE	RURAL	47	40-60	M	168	85	30.12	PRESENT	ABSENT	NO	NO	YES	0.0099	147	7.1	275	2.6	6	0.88	77.79	NO	ABSENT	ABSENT	NO	NO	0.49
2.03.030.014	YESMPANA	SE	RURAL	20	< 40 ?	M	177.2	116.9	37.23	PRESENT	ABSENT	NO	NO	NO	0.0086	219	5.6	73	7.7	4.9	0.76	67.18	NO	ABSENT	ABSENT	NO	NO	0.55
2.03.030.015	YESMPANA	SE	RURAL	51	40-60	M	166	76	27.58	ABSENT	PRESENT	YES	NO	NO	0.0134	167	15.6	104	15	5.4	1.19	105.2	NO	ABSENT	ABSENT	NO	NO	0.69
2.03.030.016	YESMPANA	SE	RURAL	29	< 40 ?	M	171.6	64.2	21.8	ABSENT	ABSENT	YES	NO	YES	0.0082	90	5.9	138	4.3	3.6	0.73	64.53	NO	ABSENT	ABSENT	NO	NO	0.48
2.03.030.017	YESMPANA	SE	RURAL	46	40-60	F	164	87	32.35	PRESENT	ABSENT	NO	NO	YES	0.009	0	5.8	84	6.9	5.7	0.8	70.72	.	ABSENT	ABSENT	NO	NO	0.6
2.03.030.018	YESMPANA	SE	RURAL	78	>60	M	168.2	69	24.39	ABSENT	ABSENT	NO	NO	NO	0.0106	161	5.3	77	6.9	5.1	0.94	83.1	NO	ABSENT	ABSENT	NO	NO	0.83
2.03.030.019	YESMPANA	SE	RURAL	21	< 40 ?	M	175	107	34.94	PRESENT	ABSENT	NO	NO	NO	0.0115	51	6.1	191	3.2	6.1	1.02	90.17	NO	ABSENT	ABSENT	NO	NO	0.5
2.03.030.020	YESMPANA	SE	RURAL	34	< 40 ?	M	167	79	28.33	ABSENT	PRESENT	NO	NO	NO	0.0106	211	6.1	152	4	4.6	0.94	83.1	NO	ABSENT	ABSENT	NO	NO	0.65
2.03.030.021	YESMPANA	SE	RURAL	40	40-60	M	171	93	31.8	PRESENT	ABSENT	NO	NO	NO	0.0121	195	6.7	250	2.7	6.3	1.07	94.59	NO	ABSENT	ABSENT	NO	NO	0.57
2.04.001.001	GALATI	SE	URBAN	45	40-60	F	158	82.9	33.21	PRESENT	ABSENT	NO	YES	YES	0.0097	155	3	235	1.3	3.3	0.86	76.02	NO	ABSENT	ABSENT	YES	NO	0.62
2.04.001.002	GALATI	SE	URBAN	35	< 40 ?	F	168	80.3	28.45	ABSENT	ABSENT	NO	YES	NO	0.009	54	3	138	2.2	4.6	0.8	70.72	NO	ABSENT	ABSENT	YES	NO	0.46
2.04.001.003	GALATI	SE	URBAN	59	40-60	F	161	79.6	30.71	PRESENT	ABSENT	YES	NO	YES	0.0061	117	3	75	4	3.9	0.54	47.74	NO	ABSENT	ABSENT	NO	NO	0.75
2.04.001.004	GALATI	SE	URBAN	55	40-60	M	180	97	29.94	ABSENT	PRESENT	NO	YES	NO	0.0085	103	13	138	9.4	4.6	0.75	66.3	NO	ABSENT	ABSENT	YES	NO	0.62
2.04.001.005	GALATI	SE	URBAN	41	40-60	M	184	104.8	30.95	PRESENT	PRESENT	NO	YES	NO	0.0103	199	5.2	236	2.2	4.6	0.91	80.44	NO	.	ABSENT	.	0	0.55
2.04.001.006	GALATI	SE	URBAN	77	>60	F	153	90.4	38.62	PRESENT	ABSENT	NO	NO	NO	0.007	164	3	69	4.3	5.8	0.62	54.81	.	ABSENT	ABSENT	YES	NO	0.93
2.04.001.007	GALATI	SE	URBAN	54	40-60	M	183	103	30.76	PRESENT	ABSENT	YES	NO	NO	0.0075	124	8.1	159	5.1	6.6	0.66	58.34	NO	.	ABSENT	.	0	0.99
2.04.001.008	GALATI	SE	URBAN	31	< 40 ?	M	171	54.3	18.57	ABSENT	PRESENT	NO	YES	NO	0.0099	124	48	299	16.1	8.1	0.88	77.79	NO	ABSENT	ABSENT	NO	NO	0.58
2.04.001.009	GALATI	SE	URBAN	44	40-60	M	174	100	33.03	PRESENT	ABSENT	YES	NO	NO	0.0104	218	3.2	118	2.7	6.6	0.92	81.33	NO	ABSENT	ABSENT	NO	NO	0.75
2.04.001.010	GALATI	SE	URBAN	28	< 40 ?	F	167.5	69	24.59	ABSENT	ABSENT	YES	YES	NO	0.0078	73	4.7	140	3.4	4.3	0.69	61	NO	ABSENT	ABSENT	NO	NO	0.49
2.04.001.011	GALATI	SE	URBAN	31	< 40 ?	M	188	96.9	27.42	ABSENT	PRESENT	NO	YES	YES	0.0115	155	6.8	278	2.4	5.6	1.02	90.17	NO	ABSENT	ABSENT	NO	NO	0.51
2.04.001.013	GALATI	SE	URBAN	38	< 40 ?	M	168	84.2	29.83	ABSENT	PRESENT	NO	NO	NO	0.0071	202	10.5	158	6.6	2.7	0.63	55.69	NO	.	ABSENT	.	0	0.85
2.04.001.014	GALATI	SE	URBAN	33	< 40 ?	F	154	50	21.08	ABSENT	PRESENT	YES	YES	NO	0.0073	33	15.5	397	3.9	4.9	0.65	57.46	NO	ABSENT	ABSENT	YES	YES	0.57
2.04.037.001	INDEPENDENTA	SE	RURAL	41	40-60	F	162	74.9	28.54	ABSENT	ABSENT	NO	NO	NO	0.0092	98	7.6	193	3.9	4.9	0.81	71.6	NO	ABSENT	ABSENT	NO	NO	0.47
2.04.037.002	INDEPENDENTA	SE	RURAL	23	< 40 ?	M	169.5	58.5	20.36	ABSENT	ABSENT	NO	YES	NO	0.0088	138	6.7	146	4.6	5.2	0.78	68.95	NO	ABSENT	ABSENT	NO	NO	0.44
2.04.037.003	INDEPENDENTA	SE	RURAL	36	< 40 ?	F	158.5	74.5	29.65	ABSENT	ABSENT	NO	YES	NO	0.008	98	3	97	3.1	4.8	0.71	62.76	NO	ABSENT	ABSENT	NO	NO	0.49
2.04.037.004	INDEPENDENTA	SE	RURAL	22	< 40 ?	F	156	49.7	20.42	ABSENT	ABSENT	NO	YES	NO	0.0073	139	5.2	208	2.5	4.4	0.65	57.46	NO	ABSENT	ABSENT	YES	NO	0.41
2.04.037.005	INDEPENDENTA	SE	RURAL	30	< 40 ?	F	158	59.3	23.75	ABSENT	ABSENT	NO	NO	YES	0.0071	23	92.3	36	256.4	3.7	0.63	55.69	NO	ABSENT	ABSENT	NO	NO	0.41
2.04.037.006	INDEPENDENTA	SE	RURAL	66	>60	F	154	87	36.68	PRESENT	ABSENT	YES	YES	NO	0.0078	27	3	22	13.6	5.2	0.69	61	NO	.	ABSENT	.	.	0.92
2.04.037.007	INDEPENDENTA	SE	RURAL	65	>60	M	164.5	72	26.61	ABSENT	ABSENT	YES	NO	NO	0.0103	44	3	83	3.6	6.9	0.91	80.44	NO	.	ABSENT	.	.
2.04.037.008	INDEPENDENTA	SE	RURAL	37	< 40 ?	F	162	67	25.53	ABSENT	ABSENT	NO	YES	NO	0.007	151	3	110	2.7	5.3	0.62	54.81	NO	ABSENT	ABSENT	NO	NO	0.51
2.04.037.009	INDEPENDENTA	SE	RURAL	55	40-60	F	155.5	64.5	26.67	ABSENT	ABSENT	NO	NO	NO	0.0068	99	12.4	151	8.2	5.5	0.6	53.04	NO	ABSENT	ABSENT	NO	NO	0.68
2.04.037.010	INDEPENDENTA	SE	RURAL	57	40-60	M	159.7	73.4	28.78	ABSENT	ABSENT	YES	NO	NO	0.0094	119	33.2	144	23.1	10	0.83	73.37	NO	ABSENT	ABSENT	NO	NO	0.68
2.04.037.011	INDEPENDENTA	SE	RURAL	53	40-60	F	165.5	90.3	32.97	PRESENT	ABSENT	YES	NO	NO	0.0095	220	3	163	1.8	4.6	0.84	74.26	NO	.	ABSENT	.	.	0.67
2.04.037.012	INDEPENDENTA	SE	RURAL	60	>60	M	171	79.9	27.32	ABSENT	PRESENT	YES	NO	NO	0.0072	119	12.7	168	7.6	4.9	0.64	56.58	NO	.	ABSENT	.	.	0.53
2.04.037.015	INDEPENDENTA	SE	RURAL	60	>60	F	152	96.5	41.77	PRESENT	ABSENT	NO	YES	YES	0.0069	74	3	65	4.6	4.2	0.61	53.92	NO	.	ABSENT	.	.	0.6
2.04.037.016	INDEPENDENTA	SE	RURAL	76	>60	F	151	85	37.28	PRESENT	ABSENT	NO	NO	NO	0.0092	105	3	75	4	4.3	0.81	71.6	NO	.	ABSENT	.	0	0.93
2.04.037.017	INDEPENDENTA	SE	RURAL	56	40-60	F	165	100	36.73	PRESENT	ABSENT	YES	NO	NO	0.0078	183	6.6	125	5.3	5.8	0.69	61	NO	ABSENT	ABSENT	NO	NO	0.68
2.04.037.018	INDEPENDENTA	SE	RURAL	33	< 40 ?	M	170	67.4	23.32	ABSENT	ABSENT	NO	YES	NO	0.0096	170	3.2	105	3	5.5	0.85	75.14	NO	ABSENT	ABSENT	NO	NO	0.47
2.04.037.019	INDEPENDENTA	SE	RURAL	68	>60	M	166.5	77.9	28.1	ABSENT	ABSENT	YES	NO	NO	0.0086	176	3	100	3	6.6	0.76	67.18	NO	ABSENT	ABSENT	NO	NO	0.82
2.04.037.020	INDEPENDENTA	SE	RURAL	32	< 40 ?	M	174	86.8	28.67	ABSENT	PRESENT	NO	YES	NO	0.0103	43	8.3	158	5.3	5.3	0.91	80.44	NO	ABSENT	ABSENT	YES	NO	0.78
2.04.037.021	INDEPENDENTA	SE	RURAL	56	40-60	F	151.5	77.4	33.72	PRESENT	ABSENT	YES	NO	NO	0.0086	132	4.1	54	7.6	3.8	0.76	67.18	NO	.	ABSENT	.	.	0.73
2.04.037.022	INDEPENDENTA	SE	RURAL	64	>60	M	177	119.3	38.08	PRESENT	ABSENT	NO	YES	NO	0.0119	115	13.9	167	8.3	7.3	1.05	92.82	.	.	ABSENT	.	.
2.05.001.001	TULCEA	SE	URBAN	55	40-60	F	167.5	63.3	22.56	ABSENT	ABSENT	YES	NO	YES	0.0067	185	5.5	83	6.6	4.8	0.59	52.16	.	ABSENT	ABSENT	NO	NO	0.62
2.05.001.002	TULCEA	SE	URBAN	37	< 40 ?	F	170	86	29.76	ABSENT	ABSENT	NO	YES	NO	0.0078	86	6.2	159	3.9	4	0.69	61	NO	ABSENT	ABSENT	NO	NO	0.71
2.05.001.003	TULCEA	SE	URBAN	78	>60	F	155	87.2	36.3	PRESENT	ABSENT	NO	NO	NO	0.0073	261	6.1	74	8.2	4.6	0.65	57.46	.	ABSENT	ABSENT	NO	NO	0.76
2.05.001.004	TULCEA	SE	URBAN	44	40-60	M	171	117.4	40.15	PRESENT	ABSENT	NO	NO	NO	0.0096	183	5.8	124	4.7	6.1	0.85	75.14	NO	ABSENT	ABSENT	YES	NO	0.6
2.05.001.005	TULCEA	SE	URBAN	18	< 40 ?	F	166	63	22.86	ABSENT	ABSENT	NO	NO	NO	0.009	123	7.7	200	3.9	4.8	0.8	70.72	NO	ABSENT	ABSENT	NO	NO	0.49
2.05.001.006	TULCEA	SE	URBAN	56	40-60	M	174	128	42.28	PRESENT	ABSENT	YES	NO	NO	0.0099	162	5.5	113	4.9	7.3	0.88	77.79	NO	ABSENT	ABSENT	NO	NO	0.98
2.05.001.007	TULCEA	SE	URBAN	38	< 40 ?	F	170	66	22.84	ABSENT	ABSENT	NO	NO	NO	0.0076	145	5.6	67	8.4	3.6	0.67	59.23	NO	ABSENT	ABSENT	YES	NO	0.49
2.05.001.008	TULCEA	SE	URBAN	27	< 40 ?	M	184.4	74.7	21.97	ABSENT	PRESENT	NO	NO	NO	0.009	22	9.9	98	10.1	4.5	0.8	70.72	NO	ABSENT	ABSENT	NO	NO	0.63
2.05.001.009	TULCEA	SE	URBAN	26	< 40 ?	M	175.5	87.5	28.41	ABSENT	PRESENT	NO	NO	NO	0.0106	169	5.7	120	4.8	5.6	0.94	83.1	NO	ABSENT	ABSENT	NO	NO	0.5
2.05.001.010	TULCEA	SE	URBAN	37	< 40 ?	M	182.5	58.4	17.53	ABSENT	ABSENT	NO	NO	NO	0.0106	143	5.4	107	5	6.2	0.94	83.1	.	ABSENT	ABSENT	NO	NO	0.53
2.05.001.011	TULCEA	SE	URBAN	40	40-60	M	167	85	30.48	PRESENT	ABSENT	YES	NO	NO	0.0114	131	6	202	3	6.5	1.01	89.28	.	ABSENT	ABSENT	NO	NO	0.53
2.05.001.012	TULCEA	SE	URBAN	76	>60	F	157.9	79.7	31.97	PRESENT	PRESENT	YES	NO	NO	0.0071	54	5.3	68	7.8	6.9	0.63	55.69	NO	ABSENT	ABSENT	NO	NO	1.03
2.05.001.013	TULCEA	SE	URBAN	76	>60	F	157	83.9	34.04	PRESENT	ABSENT	NO	NO	NO	0.0089	65	5.3	35	15.1	4	0.79	69.84	NO	ABSENT	ABSENT	NO	NO	0.72
2.05.001.014	TULCEA	SE	URBAN	44	40-60	M	164	96.2	35.77	PRESENT	ABSENT	YES	NO	YES	0.0077	149	8	189	4.2	6.2	0.68	60.11	.	ABSENT	ABSENT	NO	NO	0.55
2.05.001.016	TULCEA	SE	URBAN	34	< 40 ?	M	178.8	98.7	30.87	PRESENT	ABSENT	NO	NO	NO	0.0107	21	9.6	260	3.7	8.4	0.95	83.98	NO	ABSENT	ABSENT	NO	NO	0.55
2.05.001.017	TULCEA	SE	URBAN	37	< 40 ?	F	169.5	74.3	25.86	ABSENT	ABSENT	YES	NO	NO	0.0078	205	7.5	161	4.7	4.6	0.69	61	.	ABSENT	ABSENT	NO	NO	0.55
2.05.001.018	TULCEA	SE	URBAN	19	< 40 ?	M	160.1	58.2	22.71	ABSENT	ABSENT	NO	NO	NO	0.0096	37	6.4	161	4	4	0.85	75.14	NO	ABSENT	ABSENT	NO	NO	0.49
2.05.027.001	JIJILA	SE	RURAL	45	40-60	M	171.5	91.1	30.97	PRESENT	ABSENT	NO	NO	NO	0.012	67	6.1	94	6.5	6.1	1.06	93.7	NO	ABSENT	ABSENT	NO	NO	0.58
2.05.027.002	JIJILA	SE	RURAL	46	40-60	F	154	60.1	25.34	ABSENT	ABSENT	NO	NO	NO	0.0053	251	6.2	118	5.3	3.2	0.47	41.55	NO	ABSENT	ABSENT	YES	NO	0.49
2.05.027.003	JIJILA	SE	RURAL	26	< 40 ?	F	159	53.7	21.24	ABSENT	ABSENT	NO	NO	NO	0.0076	70	10	264	3.8	4.4	0.67	59.23	NO	.	ABSENT	.	0	0.51
2.05.027.004	JIJILA	SE	RURAL	67	>60	M	167	103.8	37.22	PRESENT	ABSENT	NO	NO	NO	0.0451	93	1378.8	33	4178.2	6	3.99	352.72	YES	ABSENT	PRESENT	NO	NO	0.65
2.05.027.005	JIJILA	SE	RURAL	40	40-60	M	166.2	92.8	33.6	PRESENT	ABSENT	YES	NO	NO	0.009	95	6.1	137	4.5	5.9	0.8	70.72	NO	ABSENT	ABSENT	NO	NO	0.56
2.05.027.006	JIJILA	SE	RURAL	44	40-60	F	167	79	28.33	ABSENT	ABSENT	YES	NO	NO	0.0075	235	6.5	130	5	4.2	0.66	58.34	NO	ABSENT	ABSENT	NO	NO	0.49
2.05.027.007	JIJILA	SE	RURAL	42	40-60	M	173	79	26.4	ABSENT	ABSENT	NO	NO	NO	0.0079	195	8.9	234	3.8	4.4	0.7	61.88	NO	ABSENT	ABSENT	NO	NO	0.61
2.05.027.008	JIJILA	SE	RURAL	70	>60	F	139	81	41.92	PRESENT	ABSENT	YES	NO	NO	0.008	194	5.6	56	10	4.1	0.71	62.76	NO	ABSENT	ABSENT	YES	NO	0.72
2.05.027.009	JIJILA	SE	RURAL	75	>60	F	154	69	29.09	ABSENT	ABSENT	NO	NO	YES	0.0061	62	5.4	35	15.4	2.3	0.54	47.74	NO	ABSENT	ABSENT	NO	NO	0.93
2.05.027.010	JIJILA	SE	RURAL	42	40-60	M	165	76.5	28.1	ABSENT	ABSENT	YES	NO	NO	0.0087	139	9.7	255	3.8	5.5	0.77	68.07	NO	ABSENT	ABSENT	NO	NO	0.57
2.05.027.011	JIJILA	SE	RURAL	79	>60	F	143.9	49.8	24.05	ABSENT	ABSENT	YES	NO	NO	0.0071	168	6.2	77	8.1	4	0.63	55.69	NO	ABSENT	ABSENT	NO	NO	1.04
2.05.027.012	JIJILA	SE	RURAL	33	< 40 ?	F	144	52	25.08	ABSENT	ABSENT	NO	NO	NO	0.0068	43	6.4	89	7.2	4.2	0.6	53.04	NO	ABSENT	ABSENT	NO	NO	0.46
2.05.027.013	JIJILA	SE	RURAL	32	< 40 ?	M	177	71.2	22.73	ABSENT	ABSENT	NO	NO	NO	0.009	128	7.2	231	3.1	4.7	0.8	70.72	NO	ABSENT	ABSENT	UNKNOWN	NO	0.43
2.05.027.014	JIJILA	SE	RURAL	77	>60	M	164.5	72.6	26.83	ABSENT	ABSENT	YES	NO	YES	0.008	159	5.9	80	7.4	6	0.71	62.76	NO	ABSENT	ABSENT	YES	NO	0.77
2.05.027.015	JIJILA	SE	RURAL	76	>60	M	170	79.8	27.61	ABSENT	ABSENT	NO	NO	NO	0.0071	233	9.1	118	7.7	4.2	0.63	55.69	NO	ABSENT	ABSENT	NO	NO	0.81
2.05.027.016	JIJILA	SE	RURAL	23	< 40 ?	M	168	76.6	27.14	ABSENT	PRESENT	NO	YES	NO	0.0098	153	5.8	230	2.5	5	0.87	76.91	NO	ABSENT	ABSENT	NO	NO	0.49
2.06.001.001	FOCS	SE	URBAN	61	>60	M	174	93	30.72	PRESENT	ABSENT	YES	NO	NO	0.0102	145	3.5	161	2.2	5.4	0.9	79.56	NO	ABSENT	ABSENT	YES	NO	0.59
2.06.001.002	FOCS	SE	URBAN	36	< 40 ?	M	188	96	27.16	ABSENT	ABSENT	NO	YES	NO	0.0112	114	97.3	150	64.9	5.9	0.99	87.52	NO	ABSENT	ABSENT	YES	NO	0.51
2.06.001.003	FOCS	SE	URBAN	24	< 40 ?	F	176	66	21.31	ABSENT	ABSENT	NO	YES	YES	0.0081	106	3	105	2.9	4.2	0.72	63.65	NO	ABSENT	ABSENT	NO	NO	0.48
2.06.001.004	FOCS	SE	URBAN	44	40-60	F	156	79	32.46	PRESENT	PRESENT	NO	YES	NO	0.0081	66	9.2	97	9.5	4.8	0.72	63.65	NO	ABSENT	ABSENT	NO	NO	0.6
2.06.001.005	FOCS	SE	URBAN	44	40-60	F	173	80	26.73	ABSENT	ABSENT	YES	NO	NO	0.0078	132	3	125	2.4	4.2	0.69	61	NO	ABSENT	ABSENT	NO	NO	0.57
2.06.001.006	FOCS	SE	URBAN	72	>60	F	156	64	26.3	ABSENT	ABSENT	YES	NO	NO	0.0086	204	21.4	68	31.5	3.9	0.76	67.18	UNKNOWN	ABSENT	ABSENT	NO	NO	0.74
2.06.001.007	FOCS	SE	URBAN	48	40-60	F	167	79	28.33	ABSENT	ABSENT	NO	YES	NO	0.007	41	3	43	7	4	0.62	54.81	NO	PRESENT	PRESENT	NO	NO	0.46
2.06.001.008	FOCS	SE	URBAN	21	< 40 ?	F	165	71	26.08	ABSENT	ABSENT	NO	YES	NO	0.0077	180	3.5	195	1.8	5.1	0.68	60.11	NO	ABSENT	ABSENT	NO	NO	0.45
2.06.001.009	FOCS	SE	URBAN	44	40-60	F	159	86	34.02	PRESENT	ABSENT	YES	NO	NO	0.0079	131	3	62	4.8	4.5	0.7	61.88	NO	ABSENT	ABSENT	NO	NO	0.67
2.06.001.010	FOCS	SE	URBAN	55	40-60	F	156	67	27.53	ABSENT	ABSENT	YES	NO	NO	0.0086	184	7.9	57	13.9	4.4	0.76	67.18	NO	ABSENT	ABSENT	NO	NO	0.65
2.06.001.011	FOCS	SE	URBAN	21	< 40 ?	F	153	46	19.65	ABSENT	ABSENT	NO	YES	NO	0.0067	202	12.1	219	5.5	3.1	0.59	52.16	NO	ABSENT	ABSENT	YES	NO	0.45
2.06.001.012	FOCS	SE	URBAN	68	>60	M	178	93	29.35	ABSENT	ABSENT	YES	NO	YES	0.0124	84	345.4	137	252.1	7.1	1.1	97.24	NO	ABSENT	ABSENT	NO	NO	0.76
2.06.001.013	FOCS	SE	URBAN	51	40-60	M	166	80	29.03	ABSENT	PRESENT	NO	YES	NO	0.0079	125	10.1	311	3.2	5.7	0.7	61.88	NO	ABSENT	ABSENT	YES	NO	0.68
2.06.001.014	FOCS	SE	URBAN	28	< 40 ?	F	170	58	20.07	ABSENT	ABSENT	NO	YES	NO	0.0059	158	9.7	172	5.6	2.3	0.52	45.97	NO	ABSENT	ABSENT	NO	NO	0.46
2.06.001.015	FOCS	SE	URBAN	21	< 40 ?	M	178	54	17.04	ABSENT	ABSENT	NO	YES	NO	0.0098	131	11.5	198	5.8	4	0.87	76.91	NO	ABSENT	ABSENT	NO	NO	0.5
2.06.001.016	FOCS	SE	URBAN	71	>60	F	158	82	32.85	PRESENT	ABSENT	YES	NO	NO	0.0081	140	16.7	141	11.8	6	0.72	63.65	NO	ABSENT	ABSENT	NO	NO	0.83
2.06.001.017	FOCS	SE	URBAN	72	>60	F	157	63	25.56	ABSENT	ABSENT	YES	NO	NO	0.0077	96	5	43	11.6	6.5	0.68	60.11	NO	ABSENT	ABSENT	NO	NO	0.71
2.06.001.018	FOCS	SE	URBAN	28	< 40 ?	F	161	57	21.99	ABSENT	ABSENT	YES	YES	NO	0.0073	237	4.1	148	2.8	2.9	0.65	57.46	NO	ABSENT	ABSENT	NO	NO	0.46
2.06.001.019	FOCS	SE	URBAN	60	>60	F	161	80	30.86	PRESENT	ABSENT	YES	NO	NO	0.0089	190	5.7	83	6.9	4.9	0.79	69.84	NO	ABSENT	ABSENT	YES	NO	0.52
2.06.001.020	FOCS	SE	URBAN	59	40-60	M	177	84	26.81	ABSENT	ABSENT	YES	NO	NO	0.013	112	4.5	127	3.5	7.6	1.15	101.66	NO	ABSENT	ABSENT	NO	NO	0.6
2.06.001.021	FOCS	SE	URBAN	76	>60	M	165	77	28.28	ABSENT	ABSENT	YES	NO	NO	0.0108	86	3	48	6.3	6.2	0.96	84.86	NO	ABSENT	ABSENT	NO	NO	0.98
2.06.001.022	FOCS	SE	URBAN	62	>60	M	179	76	23.72	ABSENT	ABSENT	YES	NO	NO	0.0095	83	7.4	120	6.2	5.3	0.84	74.26	NO	ABSENT	ABSENT	NO	NO	0.92
2.06.001.024	FOCS	SE	URBAN	47	40-60	F	175	71	23.18	ABSENT	ABSENT	NO	YES	NO	0.0066	132	4.8	131	3.7	3.5	0.58	51.27	NO	ABSENT	ABSENT	NO	NO	0.71
2.06.001.025	FOCS	SE	URBAN	48	40-60	F	169	90	31.51	PRESENT	ABSENT	YES	YES	NO	0.0076	142	3	74	4.1	6.9	0.67	59.23	NO	ABSENT	ABSENT	NO	NO	0.57
2.06.001.026	FOCS	SE	URBAN	21	< 40 ?	F	181	60	18.31	ABSENT	ABSENT	YES	YES	NO	0.0071	208	8.7	182	4.8	3.7	0.63	55.69	NO	ABSENT	ABSENT	NO	NO	0.51
2.06.001.027	FOCS	SE	URBAN	68	>60	M	168	70	24.8	ABSENT	ABSENT	YES	NO	NO	0.0101	193	10.4	88	11.8	5.1	0.89	78.68	NO	ABSENT	ABSENT	YES	NO	0.69
2.06.001.028	FOCS	SE	URBAN	70	>60	F	161	55	21.22	ABSENT	ABSENT	YES	YES	YES	0.0079	89	3	49	6.1	5	0.7	61.88	NO	ABSENT	ABSENT	NO	NO	0.7
2.06.001.029	FOCS	SE	URBAN	76	>60	M	170	88	30.45	PRESENT	ABSENT	YES	NO	YES	0.0149	148	3	73	4.1	8.9	1.32	116.69	NO	ABSENT	ABSENT	NO	NO	0.93
2.06.001.030	FOCS	SE	URBAN	52	40-60	M	174	101	33.36	PRESENT	ABSENT	YES	NO	YES	0.0107	261	3	157	1.9	5.6	0.95	83.98	NO	ABSENT	ABSENT	YES	NO	0.51
2.06.001.031	FOCS	SE	URBAN	30	< 40 ?	F	162	47	17.91	ABSENT	ABSENT	YES	YES	NO	0.008	75	6.7	178	3.8	4.4	0.71	62.76	NO	ABSENT	ABSENT	YES	NO	0.5
2.06.001.032	FOCS	SE	URBAN	25	< 40 ?	F	171	64	21.89	ABSENT	ABSENT	NO	YES	NO	0.0072	47	3	173	1.7	3.8	0.64	56.58	NO	ABSENT	ABSENT	NO	NO	0.49
2.06.001.033	FOCS	SE	URBAN	65	>60	F	160	76	29.69	ABSENT	ABSENT	YES	NO	NO	0.0086	88	3	36	8.3	3.2	0.76	67.18	NO	ABSENT	ABSENT	NO	NO	0.66
2.06.001.034	FOCS	SE	URBAN	18	< 40 ?	M	167	88	31.55	PRESENT	ABSENT	YES	NO	NO	0.0111	111	5	244	2	7.6	0.98	86.63	NO	ABSENT	ABSENT	NO	NO	0.61
2.06.001.035	FOCS	SE	URBAN	19	< 40 ?	M	180	88	27.16	ABSENT	PRESENT	YES	NO	YES	0.0104	68	8.8	253	3.5	5.3	0.92	81.33	NO	ABSENT	ABSENT	NO	NO	0.53
2.06.001.036	FOCS	SE	URBAN	54	40-60	F	155	90	37.46	PRESENT	ABSENT	YES	YES	NO	0.0076	100	3	136	2.2	5.3	0.67	59.23	NO	ABSENT	ABSENT	NO	NO	0.78
2.06.001.037	FOCS	SE	URBAN	23	< 40 ?	M	179	74	23.1	ABSENT	ABSENT	NO	YES	YES	0.0103	80	5.8	174	3.3	5	0.91	80.44	NO	ABSENT	ABSENT	NO	NO	0.46
2.06.001.038	FOCS	SE	URBAN	61	>60	F	158	96	38.46	PRESENT	ABSENT	YES	NO	NO	0.007	133	3	176	1.7	4.3	0.62	54.81	NO	ABSENT	ABSENT	YES	NO	0.68
2.06.001.039	FOCS	SE	URBAN	72	>60	F	158	85	34.05	PRESENT	ABSENT	YES	NO	NO	0.0103	145	2.1	69	3	6.7	0.91	80.44	NO	ABSENT	ABSENT	YES	NO	0.91
2.06.001.040	FOCS	SE	URBAN	48	40-60	M	175	85	27.76	ABSENT	PRESENT	YES	NO	NO	0.011	202	3.3	175	1.9	4.9	0.97	85.75	NO	ABSENT	ABSENT	YES	NO	0.52
2.06.001.041	FOCS	SE	URBAN	43	40-60	F	161	75	28.93	ABSENT	ABSENT	NO	NO	YES	0.0075	201	197.4	203	97.2	3.4	0.66	58.34	NO	ABSENT	ABSENT	YES	NO	0.63
2.06.001.042	FOCS	SE	URBAN	30	< 40 ?	M	173	70	23.39	ABSENT	ABSENT	NO	YES	YES	0.0092	150	3	173	1.7	4	0.81	71.6	NO	ABSENT	ABSENT	NO	NO	0.51
2.06.001.043	FOCS	SE	URBAN	37	< 40 ?	F	180	102	31.48	PRESENT	ABSENT	NO	YES	NO	0.007	246	27.2	309	8.8	3.8	0.62	54.81	NO	ABSENT	ABSENT	NO	NO	0.52
2.06.001.044	FOCS	SE	URBAN	36	< 40 ?	M	183	78	23.29	ABSENT	ABSENT	YES	YES	NO	0.0098	72	3	154	1.9	3.5	0.87	76.91	NO	ABSENT	ABSENT	YES	NO	0.56
2.06.001.045	FOCS	SE	URBAN	80	>60	F	163	63	23.71	ABSENT	ABSENT	YES	YES	NO	0.0064	51	3	76	3.9	3.7	0.57	50.39	NO	ABSENT	ABSENT	NO	NO	0.99
2.06.053.001	SLOBOZIA BRADULUI	SE	RURAL	59	40-60	M	175	90	29.39	ABSENT	ABSENT	NO	YES	NO	0.0106	153	3	81	3.7	4.7	0.94	83.1	NO	ABSENT	ABSENT	NO	NO	0.61
2.06.053.002	SLOBOZIA BRADULUI	SE	RURAL	50	40-60	F	155	62	25.81	ABSENT	ABSENT	NO	YES	NO	0.0076	68	3	48	6.3	3.4	0.67	59.23	NO	ABSENT	ABSENT	NO	NO	0.6
2.06.053.003	SLOBOZIA BRADULUI	SE	RURAL	36	< 40 ?	F	155	94	39.13	PRESENT	ABSENT	NO	YES	NO	0.0059	220	3	174	1.7	3.8	0.52	45.97	NO	ABSENT	ABSENT	NO	NO	0.84
2.06.053.004	SLOBOZIA BRADULUI	SE	RURAL	80	>60	M	160	65	25.39	ABSENT	ABSENT	YES	NO	NO	0.0096	158	8.4	139	6	5.1	0.85	75.14	NO	ABSENT	ABSENT	YES	NO	0.78
2.06.053.005	SLOBOZIA BRADULUI	SE	RURAL	24	< 40 ?	F	162	81	30.86	PRESENT	ABSENT	NO	YES	NO	0.0086	204	7.8	286	2.7	4.7	0.76	67.18	NO	ABSENT	ABSENT	YES	NO	0.54
2.06.053.006	SLOBOZIA BRADULUI	SE	RURAL	36	< 40 ?	F	154	90	37.95	PRESENT	ABSENT	YES	NO	YES	0.007	179	36.2	117	30.9	5.7	0.62	54.81	NO	ABSENT	ABSENT	NO	NO	0.61
2.06.053.007	SLOBOZIA BRADULUI	SE	RURAL	27	< 40 ?	F	154	46	19.4	ABSENT	ABSENT	YES	NO	YES	0.0068	159	3	89	3.4	4.2	0.6	53.04	NO	ABSENT	ABSENT	YES	NO	0.53
2.06.053.008	SLOBOZIA BRADULUI	SE	RURAL	31	< 40 ?	F	162	78	29.72	ABSENT	ABSENT	NO	YES	NO	0.0081	152	4.3	201	2.1	5.5	0.72	63.65	NO	ABSENT	ABSENT	YES	NO	0.52
2.06.053.009	SLOBOZIA BRADULUI	SE	RURAL	31	< 40 ?	F	154	76	32.05	PRESENT	PRESENT	NO	YES	NO	0.0057	241	31.6	234	13.5	2.7	0.5	44.2	NO	ABSENT	ABSENT	NO	NO	0.55
2.06.053.010	SLOBOZIA BRADULUI	SE	RURAL	23	< 40 ?	F	165	71	26.08	ABSENT	ABSENT	NO	YES	NO	0.0069	69	3	96	3.1	5.3	0.61	53.92	NO	ABSENT	ABSENT	YES	NO	0.5
2.06.053.011	SLOBOZIA BRADULUI	SE	RURAL	23	< 40 ?	F	155	52	21.64	ABSENT	ABSENT	NO	YES	NO	0.0079	106	11	246	4.5	3.3	0.7	61.88	NO	ABSENT	ABSENT	NO	NO	0.5
2.06.053.012	SLOBOZIA BRADULUI	SE	RURAL	27	< 40 ?	M	179	60	18.73	ABSENT	PRESENT	YES	NO	NO	0.0098	130	10.8	279	3.9	5.5	0.87	76.91	NO	ABSENT	ABSENT	NO	NO	0.61
2.06.053.013	SLOBOZIA BRADULUI	SE	RURAL	23	< 40 ?	M	171	84	28.73	ABSENT	PRESENT	NO	NO	NO	0.0101	188	9.9	247	4	3.1	0.89	78.68	NO	ABSENT	ABSENT	YES	NO	0.49
2.06.053.014	SLOBOZIA BRADULUI	SE	RURAL	18	< 40 ?	F	162	103	39.25	PRESENT	ABSENT	NO	YES	NO	0.0047	213	58.8	105	56	5	0.42	37.13	NO	ABSENT	ABSENT	NO	NO	0.65
2.06.053.016	SLOBOZIA BRADULUI	SE	RURAL	31	< 40 ?	M	171	88	30.09	PRESENT	ABSENT	YES	NO	NO	0.0095	196	3.9	105	3.7	4.4	0.84	74.26	NO	ABSENT	ABSENT	NO	NO	0.59
2.06.053.017	SLOBOZIA BRADULUI	SE	RURAL	21	< 40 ?	F	160	51	19.92	ABSENT	ABSENT	NO	YES	NO	0.0063	217	6.1	142	4.3	3.1	0.56	49.5	NO	ABSENT	ABSENT	NO	NO	0.43
2.06.053.018	SLOBOZIA BRADULUI	SE	RURAL	37	< 40 ?	M	163	57	21.45	ABSENT	ABSENT	NO	YES	NO	0.0096	142	259.9	251	103.5	4.3	0.85	75.14	NO	ABSENT	ABSENT	YES	NO	0.57
2.06.053.019	SLOBOZIA BRADULUI	SE	RURAL	42	40-60	M	164	96	35.69	PRESENT	ABSENT	YES	NO	NO	0.0148	150	15	219	6.8	8.2	1.31	115.8	NO	ABSENT	ABSENT	NO	NO	0.56
3.01.001.001	PITESTI	S	URBAN	56	40-60	F	163	83	31.24	PRESENT	ABSENT	YES	NO	NO	0.0082	199	3	112	2.7	2.9	0.73	64.53	NO	ABSENT	ABSENT	YES	NO	0.62
3.01.001.002	PITESTI	S	URBAN	58	40-60	M	182	107	32.3	PRESENT	ABSENT	YES	YES	NO	0.0114	161	3	103	2.9	6.1	1.01	89.28	YES	ABSENT	PRESENT	YES	NO	0.62
3.01.001.003	PITESTI	S	URBAN	61	>60	M	167	81	29.04	ABSENT	ABSENT	NO	NO	NO	0.0097	182	3	67	4.5	5.4	0.86	76.02	NO	ABSENT	ABSENT	NO	NO	0.76
3.01.001.004	PITESTI	S	URBAN	59	40-60	F	150	57	25.33	ABSENT	ABSENT	YES	NO	NO	0.0088	138	3	65	4.6	4.7	0.78	68.95	NO	ABSENT	ABSENT	YES	NO	0.71
3.01.001.005	PITESTI	S	URBAN	71	>60	M	162	80	30.48	PRESENT	ABSENT	YES	NO	YES	0.0103	165	36.2	117	30.9	4.9	0.91	80.44	NO	ABSENT	ABSENT	NO	NO
3.01.001.006	PITESTI	S	URBAN	42	40-60	F	156	77	31.64	PRESENT	ABSENT	NO	YES	NO	0.0068	83	9.8	130	7.5	5.1	0.6	53.04	NO	ABSENT	ABSENT	NO	NO	0.57
3.01.001.007	PITESTI	S	URBAN	48	40-60	M	184	90	26.58	ABSENT	ABSENT	NO	NO	NO	0.0111	66	3	68	4.4	4.1	0.98	86.63	NO	ABSENT	ABSENT	YES	NO	0.69
3.01.001.008	PITESTI	S	URBAN	67	>60	M	156	70	28.76	ABSENT	ABSENT	YES	YES	YES	0.0104	80	3	46	6.5	5.7	0.92	81.33	NO	ABSENT	ABSENT	NO	NO	0.72
3.01.001.009	PITESTI	S	URBAN	40	40-60	F	162	59	22.48	ABSENT	ABSENT	NO	YES	YES	0.0077	179	3	128	2.3	3.6	0.68	60.11	NO	.	ABSENT	.	.	0.48
3.01.001.010	PITESTI	S	URBAN	53	40-60	M	174	80	26.42	ABSENT	ABSENT	NO	NO	NO	0.0114	141	3	135	2.2	5.2	1.01	89.28	NO	ABSENT	ABSENT	UNKNOWN	NO	0.65
3.01.001.011	PITESTI	S	URBAN	63	>60	F	156	89	36.57	PRESENT	ABSENT	YES	NO	NO	0.0076	91	3	80	3.8	5.9	0.67	59.23	NO	ABSENT	ABSENT	YES	NO	0.62
3.01.001.013	PITESTI	S	URBAN	46	40-60	F	168	66	23.38	ABSENT	PRESENT	NO	NO	NO	0.0075	40	22.3	198	11.3	3.5	0.66	58.34	NO	ABSENT	ABSENT	YES	NO	0.6
3.01.001.014	PITESTI	S	URBAN	23	< 40 ?	M	179	68	21.22	ABSENT	ABSENT	NO	YES	YES	0.0102	47	6.8	137	5	4.7	0.9	79.56	NO	ABSENT	ABSENT	YES	NO	0.54
3.01.001.015	PITESTI	S	URBAN	39	< 40 ?	M	168	67	23.74	ABSENT	ABSENT	NO	YES	YES	0.0095	35	3.4	118	2.9	4.4	0.84	74.26	NO	ABSENT	ABSENT	NO	NO	0.54
3.01.001.016	PITESTI	S	URBAN	77	>60	F	155	83	34.55	PRESENT	ABSENT	NO	NO	NO	0.0067	220	8.2	124	6.6	5.9	0.59	52.16	NO	ABSENT	ABSENT	NO	NO	0.74
3.01.001.017	PITESTI	S	URBAN	50	40-60	F	165	87	31.96	PRESENT	ABSENT	YES	NO	NO	0.0079	77	3	92	3.3	4.9	0.7	61.88	NO	ABSENT	ABSENT	YES	NO	0.65
3.01.001.018	PITESTI	S	URBAN	30	< 40 ?	F	171	55.5	18.98	ABSENT	ABSENT	NO	YES	NO	0.0077	52	3	84	3.6	3.9	0.68	60.11	NO	ABSENT	ABSENT	YES	NO	0.56
3.01.001.019	PITESTI	S	URBAN	68	>60	F	158	130.7	52.36	PRESENT	ABSENT	YES	YES	YES	0.0087	40	3	51	5.9	10.6	0.77	68.07	NO	ABSENT	ABSENT	NO	NO	0.74
3.01.001.020	PITESTI	S	URBAN	75	>60	M	159	77	30.46	PRESENT	ABSENT	NO	YES	NO	0.0107	149	3	98	3.1	6.4	0.95	83.98	NO	ABSENT	ABSENT	NO	NO	0.77
3.01.001.021	PITESTI	S	URBAN	41	40-60	F	158	51	20.43	ABSENT	ABSENT	NO	YES	NO	0.0077	77	3	109	2.8	2.5	0.68	60.11	NO	ABSENT	ABSENT	NO	NO	0.51
3.01.001.022	PITESTI	S	URBAN	30	< 40 ?	F	164	58.7	21.82	ABSENT	ABSENT	NO	YES	NO	0.0078	192	9.7	209	4.6	3	0.69	61	NO	ABSENT	ABSENT	NO	NO	0.59
3.01.001.023	PITESTI	S	URBAN	33	< 40 ?	F	163	69	25.97	ABSENT	ABSENT	NO	YES	NO	0.0082	128	3	44	6.8	4.4	0.73	64.53	NO	ABSENT	ABSENT	NO	NO	0.56
3.01.001.024	PITESTI	S	URBAN	30	< 40 ?	M	172	75.4	25.49	ABSENT	PRESENT	NO	NO	NO	0.0094	121	3	173	1.7	5.1	0.83	73.37	NO	ABSENT	ABSENT	NO	NO	0.43
3.01.001.025	PITESTI	S	URBAN	67	>60	M	167	76.9	27.57	ABSENT	ABSENT	NO	NO	NO	0.0079	170	18	119	15.1	5.9	0.7	61.88	NO	ABSENT	ABSENT	NO	NO	0.86
3.01.001.026	PITESTI	S	URBAN	23	< 40 ?	F	168	61	21.61	ABSENT	PRESENT	NO	YES	NO	0.0073	162	4.2	162	2.6	2.6	0.65	57.46	NO	ABSENT	ABSENT	NO	NO
3.01.001.027	PITESTI	S	URBAN	54	40-60	M	186	117.4	33.93	PRESENT	ABSENT	YES	NO	NO	0.0106	41	3	80	3.8	7.3	0.94	83.1	YES	.	PRESENT	.	.	0.9
3.01.001.028	PITESTI	S	URBAN	45	40-60	F	156	66.2	27.2	ABSENT	ABSENT	NO	YES	NO	0.0068	98	6.3	101	6.2	2.9	0.6	53.04	NO	ABSENT	ABSENT	YES	NO	0.56
3.01.001.029	PITESTI	S	URBAN	23	< 40 ?	F	161	59	22.76	ABSENT	ABSENT	NO	YES	NO	0.0071	136	3	108	2.8	3.7	0.63	55.69	NO	ABSENT	ABSENT	NO	NO	0.46
3.01.001.030	PITESTI	S	URBAN	66	>60	M	184	80.7	23.84	ABSENT	ABSENT	YES	NO	YES	0.012	69	3.6	58	6.2	4	1.06	93.7	NO	.	ABSENT	.	.	0.8
3.01.001.031	PITESTI	S	URBAN	24	< 40 ?	M	169	110	38.51	PRESENT	ABSENT	NO	YES	YES	0.0116	225	3	167	1.8	5.9	1.03	91.05	NO	ABSENT	ABSENT	NO	NO	0.47
3.01.001.032	PITESTI	S	URBAN	63	>60	F	162	94	35.82	PRESENT	ABSENT	NO	YES	NO	0.0075	139	3	74	4.1	5.5	0.66	58.34	YES	ABSENT	PRESENT	NO	NO	0.75
3.01.001.033	PITESTI	S	URBAN	46	40-60	F	159	58.6	23.18	ABSENT	ABSENT	NO	YES	NO	0.0078	82	13.2	342	3.9	5.4	0.69	61	NO	ABSENT	ABSENT	NO	NO	0.49
3.01.001.034	PITESTI	S	URBAN	31	< 40 ?	M	188	98.4	27.84	ABSENT	ABSENT	YES	NO	NO	0.0124	120	14.3	149	9.6	6.4	1.1	97.24	YES	.	PRESENT	.	.	0.64
3.01.030.001	CALINESTI	S	RURAL	64	>60	F	157	87	35.3	PRESENT	ABSENT	YES	NO	NO	0.0095	100	3	29	10.3	4	0.84	74.26	NO	ABSENT	ABSENT	YES	NO	0.64
3.01.030.002	CALINESTI	S	RURAL	66	>60	M	186	106.3	30.73	PRESENT	ABSENT	YES	NO	NO	0.011	204	10.2	131	7.8	4.1	0.97	85.75	NO	ABSENT	ABSENT	YES	NO	0.8
3.01.030.004	CALINESTI	S	RURAL	60	>60	F	165	76.7	28.17	ABSENT	ABSENT	YES	NO	NO	0.0079	138	3	35	8.6	5.3	0.7	61.88	NO	ABSENT	ABSENT	YES	NO	0.76
3.01.030.005	CALINESTI	S	RURAL	24	< 40 ?	F	159	57	22.55	ABSENT	ABSENT	NO	YES	NO	0.0072	197	7.8	182	4.3	3.9	0.64	56.58	NO	ABSENT	ABSENT	YES	NO	0.54
3.01.030.007	CALINESTI	S	RURAL	68	>60	M	166	85	30.85	PRESENT	ABSENT	YES	NO	YES	0.012	136	3	244	1.2	6.1	1.06	93.7	NO	.	ABSENT	.	.	0.73
3.01.030.008	CALINESTI	S	RURAL	59	40-60	M	175	85.9	28.05	ABSENT	ABSENT	YES	NO	YES	0.0096	219	71.8	188	38.2	3.6	0.85	75.14	NO	.	ABSENT	.	.	0.82
3.01.030.009	CALINESTI	S	RURAL	27	< 40 ?	M	177	83	26.49	ABSENT	PRESENT	NO	NO	NO	0.0111	131	22	279	7.9	5.8	0.98	86.63	NO	ABSENT	ABSENT	NO	NO	0.51
3.01.030.010	CALINESTI	S	RURAL	76	>60	M	173	80	26.73	ABSENT	PRESENT	YES	NO	NO	0.0159	98	47.7	177	26.9	3.1	1.41	124.64	NO	ABSENT	ABSENT	NO	NO	0.8
3.01.030.011	CALINESTI	S	RURAL	18	< 40 ?	F	162	53.8	20.5	ABSENT	ABSENT	NO	YES	NO	0.0076	227	197.7	170	116.3	4.3	0.67	59.23	NO	ABSENT	ABSENT	YES	NO	0.53
3.01.030.012	CALINESTI	S	RURAL	63	>60	F	156	68.6	28.19	ABSENT	ABSENT	NO	NO	NO	0.0064	110	3	74	4.1	3.2	0.57	50.39	.	ABSENT	ABSENT	NO	NO	1.03
3.01.030.013	CALINESTI	S	RURAL	61	>60	M	167	127	45.54	PRESENT	ABSENT	YES	NO	NO	0.0079	170	3	100	3	4.3	0.7	61.88	YES	ABSENT	PRESENT	NO	NO	0.61
3.01.030.014	CALINESTI	S	RURAL	39	< 40 ?	F	173	69.5	23.22	ABSENT	PRESENT	NO	YES	YES	0.0088	176	16.6	152	10.9	3.7	0.78	68.95	NO	ABSENT	ABSENT	NO	NO	0.49
3.01.030.015	CALINESTI	S	RURAL	67	>60	F	167	99	35.5	PRESENT	ABSENT	NO	NO	NO	0.007	159	3	65	4.6	4.7	0.62	54.81	NO	ABSENT	ABSENT	NO	NO	0.78
3.01.030.017	CALINESTI	S	RURAL	37	< 40 ?	F	159	62	24.52	ABSENT	ABSENT	NO	NO	NO	0.0113	164	5.9	199	3	4.1	1	88.4	NO	ABSENT	ABSENT	NO	NO	0.43
3.01.030.018	CALINESTI	S	RURAL	46	40-60	M	186	67.4	19.48	ABSENT	ABSENT	NO	NO	YES	0.0128	106	3	276	1.1	4.8	1.13	99.89	NO	.	ABSENT	.	.	0.52
3.01.030.019	CALINESTI	S	RURAL	47	40-60	F	175	64.5	21.06	ABSENT	PRESENT	NO	NO	NO	0.0088	138	5.6	214	2.6	3	0.78	68.95	NO	.	ABSENT	.	0	0.52
3.01.030.020	CALINESTI	S	RURAL	31	< 40 ?	M	180	62	19.14	ABSENT	PRESENT	NO	YES	NO	0.0116	161	3	98	3.1	4.5	1.03	91.05	NO	ABSENT	ABSENT	YES	NO	0.43
3.01.030.021	CALINESTI	S	RURAL	40	40-60	F	168	70	24.8	ABSENT	ABSENT	YES	YES	NO	0.0068	71	3	79	3.8	4.3	0.6	53.04	NO	ABSENT	ABSENT	YES	NO	0.68
3.01.030.022	CALINESTI	S	RURAL	49	40-60	F	166	63	22.86	ABSENT	ABSENT	NO	YES	NO	0.0082	100	12.9	183	7	4.8	0.73	64.53	NO	ABSENT	ABSENT	NO	NO	0.56
3.01.030.023	CALINESTI	S	RURAL	46	40-60	M	176	76	24.54	ABSENT	PRESENT	YES	NO	NO	0.0098	105	9.6	163	5.9	5.9	0.87	76.91	NO	ABSENT	ABSENT	NO	NO	0.68
3.01.030.024	CALINESTI	S	RURAL	43	40-60	M	169	57	19.96	ABSENT	PRESENT	NO	YES	NO	0.008	61	112.3	245	45.8	2.7	0.71	62.76	NO	ABSENT	ABSENT	NO	NO	0.62
3.01.030.025	CALINESTI	S	RURAL	40	40-60	M	175	88	28.73	ABSENT	ABSENT	NO	NO	YES	0.0073	142	37.5	140	26.8	4.5	0.65	57.46	NO	ABSENT	ABSENT	NO	NO
3.02.001.001	CALARASI	S	URBAN	77	>60	M	170	75	25.95	ABSENT	ABSENT	YES	NO	NO	0.0113	98	5.4	143	3.8	7.4	1	88.4	NO	ABSENT	ABSENT	NO	NO	0.88
3.02.001.002	CALARASI	S	URBAN	43	40-60	F	163	63	23.71	ABSENT	PRESENT	NO	YES	NO	0.0084	73	5.8	89	6.5	4.6	0.74	65.42	NO	ABSENT	ABSENT	YES	NO	0.58
3.02.001.003	CALARASI	S	URBAN	71	>60	F	153	80	34.17	PRESENT	ABSENT	YES	NO	NO	0.0146	84	11.9	146	8.2	10.3	1.29	114.04	NO	ABSENT	ABSENT	YES	NO	0.85
3.02.001.004	CALARASI	S	URBAN	63	>60	F	160	92	35.94	PRESENT	ABSENT	YES	NO	NO	0.0072	197	5.6	95	5.9	4.6	0.64	56.58	NO	ABSENT	ABSENT	NO	NO	0.69
3.02.001.005	CALARASI	S	URBAN	71	>60	M	167	76	27.25	ABSENT	ABSENT	NO	NO	NO	0.0102	92	5.6	52	10.8	8.7	0.9	79.56	YES	ABSENT	PRESENT	NO	NO	0.91
3.02.001.006	CALARASI	S	URBAN	41	40-60	F	158	70	28.04	ABSENT	ABSENT	NO	NO	NO	0.0075	153	5.7	88	6.5	4.3	0.66	58.34	NO	ABSENT	ABSENT	NO	NO	0.5
3.02.001.007	CALARASI	S	URBAN	35	< 40 ?	M	174	83	27.41	ABSENT	ABSENT	NO	YES	NO	0.0089	139	6.2	168	3.7	4.7	0.79	69.84	NO	ABSENT	ABSENT	NO	NO	0.45
3.02.001.008	CALARASI	S	URBAN	62	>60	M	179	104	32.46	PRESENT	ABSENT	YES	NO	NO	0.0139	115	6.2	124	5	5.3	1.23	108.73	NO	ABSENT	ABSENT	NO	NO	1
3.02.001.009	CALARASI	S	URBAN	79	>60	F	167	77	27.61	ABSENT	ABSENT	NO	YES	NO	0.0073	146	5.8	64	9.1	2.7	0.65	57.46	.	ABSENT	ABSENT	NO	NO	0.87
3.02.001.010	CALARASI	S	URBAN	33	< 40 ?	F	158	57	22.83	ABSENT	PRESENT	NO	YES	NO	0.0079	146	5.9	176	3.4	3.1	0.7	61.88	NO	ABSENT	ABSENT	YES	NO	0.46
3.02.001.011	CALARASI	S	URBAN	43	40-60	M	195	87	22.88	ABSENT	ABSENT	NO	YES	NO	0.0093	133	5.9	185	3.2	5.5	0.82	72.49	.	ABSENT	ABSENT	NO	NO	0.61
3.02.001.012	CALARASI	S	URBAN	71	>60	F	159	80	31.64	PRESENT	ABSENT	NO	YES	NO	0.0092	144	5.1	95	5.4	5.5	0.81	71.6	NO	ABSENT	ABSENT	NO	NO	0.57
3.02.001.013	CALARASI	S	URBAN	23	< 40 ?	F	165	68	24.98	ABSENT	PRESENT	NO	YES	YES	0.0087	61	5.7	73	7.8	5.6	0.77	68.07	NO	ABSENT	ABSENT	NO	NO	0.44
3.02.001.015	CALARASI	S	URBAN	30	< 40 ?	M	180	73	22.53	ABSENT	ABSENT	NO	YES	NO	0.011	192	5.8	147	3.9	4	0.97	85.75	NO	ABSENT	ABSENT	NO	NO	0.46
3.02.001.016	CALARASI	S	URBAN	46	40-60	M	173	90	30.07	PRESENT	ABSENT	YES	NO	NO	0.0098	133	6.3	248	2.5	6.5	0.87	76.91	.	ABSENT	ABSENT	NO	NO	0.65
3.02.001.017	CALARASI	S	URBAN	22	< 40 ?	M	174	74	24.44	ABSENT	PRESENT	NO	YES	NO	0.0104	134	5.4	142	3.8	4.8	0.92	81.33	NO	ABSENT	ABSENT	YES	NO	0.48
3.02.008.001	BORCEA	S	RURAL	36	< 40 ?	M	178	87	27.46	ABSENT	ABSENT	YES	NO	NO	0.0098	101	6.5	212	3.1	6.5	0.87	76.91	NO	ABSENT	ABSENT	NO	NO	0.58
3.02.008.002	BORCEA	S	RURAL	44	40-60	F	168	83	29.41	ABSENT	ABSENT	NO	YES	NO	0.008	44	7.4	70	10.6	4.7	0.71	62.76	NO	ABSENT	ABSENT	NO	NO	0.52
3.02.008.003	BORCEA	S	RURAL	71	>60	F	153	80	34.17	PRESENT	ABSENT	YES	NO	NO	0.0081	112	11.3	126	9	4.5	0.72	63.65	.	.	ABSENT	.	.	0.83
3.02.008.004	BORCEA	S	RURAL	28	< 40 ?	M	172	70	23.66	ABSENT	ABSENT	NO	NO	YES	0.0105	92	6.1	176	3.5	5.3	0.93	82.21	NO	ABSENT	ABSENT	NO	NO	0.67
3.02.008.005	BORCEA	S	RURAL	67	>60	M	172	79	26.7	ABSENT	PRESENT	YES	YES	NO	0.0076	130	5.8	36	16.1	3.7	0.67	59.23	NO	ABSENT	ABSENT	NO	NO	1.06
3.02.008.006	BORCEA	S	RURAL	76	>60	M	164	76	28.26	ABSENT	ABSENT	NO	NO	NO	0.0133	135	5.8	112	5.2	9	1.18	104.31	NO	ABSENT	ABSENT	YES	NO	0.78
3.02.008.007	BORCEA	S	RURAL	28	< 40 ?	F	168	50	17.72	ABSENT	PRESENT	NO	YES	NO	0.0111	137	7.2	210	3.4	4.6	0.98	86.63	NO	ABSENT	ABSENT	YES	NO	0.49
3.02.008.008	BORCEA	S	RURAL	20	< 40 ?	F	160	91	35.55	PRESENT	ABSENT	YES	NO	NO	0.0055	156	19.8	166	11.9	5.3	0.49	43.32	NO	ABSENT	ABSENT	YES	NO	0.52
3.02.008.010	BORCEA	S	RURAL	18	< 40 ?	M	182	90	27.17	ABSENT	PRESENT	YES	NO	NO	0.0097	133	16.6	253	6.6	4.5	0.86	76.02	NO	ABSENT	ABSENT	NO	NO	0.5
3.02.008.011	BORCEA	S	RURAL	77	>60	F	153	55	23.5	ABSENT	ABSENT	YES	NO	NO	0.0095	187	19.5	129	15.1	3.5	0.84	74.26	NO	ABSENT	ABSENT	NO	NO	0.79
3.03.001.000	TARGOVISTE	S	URBAN	68	>60	F	162	100	38.1	PRESENT	ABSENT	YES	NO	NO	0.0072	98	3	74	4.1	5.8	0.64	56.58	NO	ABSENT	ABSENT	YES	NO	0.93
3.03.001.001	TARGOVISTE	S	URBAN	46	40-60	M	173	92.5	30.91	PRESENT	ABSENT	NO	NO	NO	0.0101	189	8.1	205	4	4.6	0.89	78.68	NO	ABSENT	ABSENT	NO	NO	0.66
3.03.001.002	TARGOVISTE	S	URBAN	47	40-60	F	156	58.2	23.92	ABSENT	ABSENT	NO	YES	NO	0.0073	81	3	65	4.6	3.7	0.65	57.46	NO	ABSENT	ABSENT	YES	NO	0.45
3.03.001.003	TARGOVISTE	S	URBAN	43	40-60	F	168	91.8	32.53	PRESENT	ABSENT	NO	NO	NO	0.0068	53	3	62	4.8	3.4	0.6	53.04	NO	ABSENT	ABSENT	NO	NO	0.54
3.03.001.005	TARGOVISTE	S	URBAN	74	>60	M	174	92	30.39	PRESENT	ABSENT	NO	NO	NO	0.0118	75	3	81	3.7	7	1.04	91.94	NO	.	ABSENT	.	.	0.78
3.03.001.006	TARGOVISTE	S	URBAN	43	40-60	M	178	100	31.56	PRESENT	ABSENT	NO	NO	NO	0.0116	220	3	150	2	4.6	1.03	91.05	NO	ABSENT	ABSENT	NO	NO	0.88
3.03.001.007	TARGOVISTE	S	URBAN	64	>60	F	168	91.5	32.42	PRESENT	ABSENT	YES	NO	YES	0.0079	90	3	38	7.9	4.7	0.7	61.88	NO	ABSENT	ABSENT	NO	NO	0.85
3.03.001.008	TARGOVISTE	S	URBAN	51	40-60	F	158	105	42.06	PRESENT	ABSENT	NO	NO	NO	0.0096	129	3	181	1.7	5.8	0.85	75.14	NO	ABSENT	ABSENT	NO	NO	0.69
3.03.001.009	TARGOVISTE	S	URBAN	64	>60	F	161	70	27.01	ABSENT	ABSENT	YES	YES	NO	0.0088	69	3	55	5.5	5.8	0.78	68.95	NO	ABSENT	ABSENT	NO	NO	0.7
3.03.001.010	TARGOVISTE	S	URBAN	37	< 40 ?	M	169	60	21.01	ABSENT	PRESENT	NO	NO	NO	0.0101	116	18.2	119	15.3	5.4	0.89	78.68	NO	ABSENT	ABSENT	NO	NO	0.7
3.03.001.011	TARGOVISTE	S	URBAN	58	40-60	M	170	81.5	28.2	ABSENT	ABSENT	NO	NO	NO	0.011	106	3	131	2.3	4.9	0.97	85.75	NO	ABSENT	ABSENT	YES	NO	0.7
3.03.001.012	TARGOVISTE	S	URBAN	60	>60	F	150	94	41.78	PRESENT	PRESENT	YES	NO	NO	0.0077	163	5.5	130	4.2	4.2	0.68	60.11	NO	ABSENT	ABSENT	NO	NO	0.55
3.03.001.013	TARGOVISTE	S	URBAN	27	< 40 ?	F	171	60	20.52	ABSENT	PRESENT	NO	YES	YES	0.0077	69	17.1	217	7.9	5	0.68	60.11	NO	ABSENT	ABSENT	NO	NO	0.44
3.03.001.014	TARGOVISTE	S	URBAN	28	< 40 ?	F	160	72.5	28.32	ABSENT	ABSENT	NO	YES	YES	0.0078	184	78	212	36.8	4.3	0.69	61	NO	ABSENT	ABSENT	NO	NO	0.47
3.03.001.015	TARGOVISTE	S	URBAN	58	40-60	F	157	98	39.76	PRESENT	ABSENT	YES	NO	NO	0.0081	157	3	90	3.3	4.1	0.72	63.65	NO	ABSENT	ABSENT	NO	NO	0.69
3.03.001.016	TARGOVISTE	S	URBAN	77	>60	M	159	59.7	23.61	ABSENT	ABSENT	NO	NO	NO	0.0132	156	244.6	130	188.2	6.2	1.17	103.43	NO	ABSENT	ABSENT	YES	NO	0.72
3.03.001.017	TARGOVISTE	S	URBAN	18	< 40 ?	M	177	56	17.87	ABSENT	ABSENT	NO	NO	YES	0.0093	158	6.6	268	2.5	6.1	0.82	72.49	NO	.	ABSENT	.	.	0.53
3.03.001.018	TARGOVISTE	S	URBAN	24	< 40 ?	M	178	70	22.09	ABSENT	ABSENT	NO	NO	NO	0.008	247	3	141	2.1	4.6	0.71	62.76	NO	ABSENT	ABSENT	YES	NO	0.49
3.03.001.019	TARGOVISTE	S	URBAN	43	40-60	F	177	84	26.81	ABSENT	ABSENT	NO	YES	NO	0.0094	101	3	44	6.8	4.3	0.83	73.37	NO	ABSENT	ABSENT	NO	NO	0.62
3.03.001.020	TARGOVISTE	S	URBAN	24	< 40 ?	M	174	50	16.51	ABSENT	ABSENT	NO	YES	YES	0.011	120	4.2	206	2	4.3	0.97	85.75	NO	ABSENT	ABSENT	NO	NO	0.52
3.03.001.022	TARGOVISTE	S	URBAN	57	40-60	F	151	55.5	24.34	ABSENT	ABSENT	NO	YES	NO	0.0068	134	3	53	5.7	5.2	0.6	53.04	NO	ABSENT	ABSENT	NO	NO	0.71
3.03.001.023	TARGOVISTE	S	URBAN	67	>60	M	174	108.5	35.84	PRESENT	ABSENT	YES	NO	YES	0.0116	84	3	89	3.4	7.3	1.03	91.05	NO	ABSENT	ABSENT	YES	NO	0.69
3.03.001.024	TARGOVISTE	S	URBAN	65	>60	M	161	81	31.25	PRESENT	ABSENT	YES	NO	NO	0.0141	195	6.4	278	2.3	5.2	1.25	110.5	NO	ABSENT	ABSENT	NO	NO	0.79
3.03.001.025	TARGOVISTE	S	URBAN	22	< 40 ?	M	192	108	29.3	ABSENT	ABSENT	YES	NO	NO	0.0111	112	3	244	1.2	6.9	0.98	86.63	NO	ABSENT	ABSENT	YES	NO	0.55
3.03.001.026	TARGOVISTE	S	URBAN	19	< 40 ?	F	157	46.5	18.86	ABSENT	ABSENT	NO	YES	NO	0.0077	142	5.9	208	2.8	4.1	0.68	60.11	NO	ABSENT	ABSENT	NO	NO	0.45
3.03.001.027	TARGOVISTE	S	URBAN	21	< 40 ?	M	188	76	21.5	ABSENT	ABSENT	NO	YES	NO	0.0147	134	54.4	100	54.4	8.1	1.3	114.92	NO	ABSENT	ABSENT	YES	NO	0.45
3.03.001.028	TARGOVISTE	S	URBAN	79	>60	M	169	46	16.11	ABSENT	ABSENT	YES	NO	NO	0.0132	103	6	65	9.2	6	1.17	103.43	NO	ABSENT	ABSENT	NO	NO	0.85
3.03.001.029	TARGOVISTE	S	URBAN	38	< 40 ?	M	181	93.5	28.54	ABSENT	ABSENT	NO	YES	NO	0.0106	107	3	148	2	6.8	0.94	83.1	NO	ABSENT	ABSENT	UNKNOWN	NO	0.53
3.03.001.030	TARGOVISTE	S	URBAN	35	< 40 ?	F	165	79	29.02	ABSENT	ABSENT	NO	YES	NO	0.0067	85	3	104	2.9	3.5	0.59	52.16	NO	ABSENT	ABSENT	YES	NO	0.55
3.03.001.031	TARGOVISTE	S	URBAN	48	40-60	M	180	120	37.04	PRESENT	ABSENT	YES	NO	YES	0.0116	62	36.1	115	31.4	7	1.03	91.05	NO	ABSENT	ABSENT	YES	NO	0.79
3.03.001.032	TARGOVISTE	S	URBAN	37	< 40 ?	F	166	65	23.59	ABSENT	PRESENT	NO	YES	NO	0.0082	94	3.3	174	1.9	4	0.73	64.53	NO	ABSENT	ABSENT	NO	NO	0.57
3.03.001.033	TARGOVISTE	S	URBAN	39	< 40 ?	M	186	121	34.98	PRESENT	PRESENT	NO	NO	NO	0.0087	132	5.5	101	5.4	6.5	0.77	68.07	NO	ABSENT	ABSENT	NO	NO	0.64
3.03.001.034	TARGOVISTE	S	URBAN	29	< 40 ?	F	162	48	18.29	ABSENT	ABSENT	NO	YES	NO	0.0086	71	3.4	82	4.1	4.1	0.76	67.18	NO	ABSENT	ABSENT	NO	NO	0.54
3.03.001.035	TARGOVISTE	S	URBAN	21	< 40 ?	M	173	75.3	25.16	ABSENT	PRESENT	NO	YES	NO	0.0089	62	6.2	132	4.7	4	0.79	69.84	NO	ABSENT	ABSENT	NO	NO	0.54
3.03.001.036	TARGOVISTE	S	URBAN	27	< 40 ?	F	172	77	26.03	ABSENT	ABSENT	NO	YES	NO	0.0072	70	3	91	3.3	3.3	0.64	56.58	NO	ABSENT	ABSENT	NO	NO	0.49
3.03.001.037	TARGOVISTE	S	URBAN	20	< 40 ?	F	160	63	24.61	ABSENT	PRESENT	NO	YES	NO	0.0089	21	3	84	3.6	3.6	0.79	69.84	NO	ABSENT	ABSENT	YES	NO	0.47
3.03.034.001	DRAGOMIRESTI	S	RURAL	64	>60	F	146	86	40.35	PRESENT	PRESENT	YES	NO	NO	0.0089	37	3	31	9.7	6.5	0.79	69.84	NO	ABSENT	ABSENT	NO	NO	0.72
3.03.034.002	DRAGOMIRESTI	S	RURAL	38	< 40 ?	F	157	100	40.57	PRESENT	ABSENT	YES	NO	NO	0.0072	80	3	64	4.7	6.2	0.64	56.58	NO	ABSENT	ABSENT	YES	NO	0.58
3.03.034.003	DRAGOMIRESTI	S	RURAL	59	40-60	M	168	87	30.82	PRESENT	PRESENT	YES	NO	YES	0.0106	106	13.6	319	4.3	5.4	0.94	83.1	NO	ABSENT	ABSENT	NO	NO	0.76
3.03.034.004	DRAGOMIRESTI	S	RURAL	66	>60	M	167	96	34.42	PRESENT	ABSENT	YES	NO	NO	0.0102	94	4.4	49	9	7.1	0.9	79.56	NO	ABSENT	ABSENT	YES	NO	0.69
3.03.034.005	DRAGOMIRESTI	S	RURAL	48	40-60	M	171	94	32.15	PRESENT	ABSENT	NO	NO	NO	0.0124	146	5.4	228	2.4	5.7	1.1	97.24	NO	ABSENT	ABSENT	NO	NO	0.59
3.03.034.006	DRAGOMIRESTI	S	RURAL	59	40-60	F	154	90.5	38.16	PRESENT	ABSENT	YES	NO	NO	0.0081	139	3	64	4.7	4.2	0.72	63.65	NO	ABSENT	ABSENT	YES	NO	0.87
3.03.034.007	DRAGOMIRESTI	S	RURAL	64	>60	M	179	96	29.96	ABSENT	ABSENT	NO	NO	NO	0.0095	62	3	55	5.5	4.3	0.84	74.26	NO	ABSENT	ABSENT	NO	NO	0.73
3.03.034.008	DRAGOMIRESTI	S	RURAL	61	>60	M	171	66.5	22.74	ABSENT	ABSENT	NO	YES	NO	0.0075	106	3	52	5.8	5.2	0.66	58.34	NO	ABSENT	ABSENT	YES	NO
3.03.034.009	DRAGOMIRESTI	S	RURAL	54	40-60	M	166	98	35.56	PRESENT	ABSENT	YES	NO	NO	0.009	210	7.3	111	6.6	5.5	0.8	70.72	NO	ABSENT	ABSENT	YES	NO	0.93
3.03.034.010	DRAGOMIRESTI	S	RURAL	69	>60	F	160	73.3	28.63	ABSENT	ABSENT	NO	NO	NO	0.0086	70	3	51	5.9	6.4	0.76	67.18	.	ABSENT	ABSENT	YES	NO	0.78
3.03.034.011	DRAGOMIRESTI	S	RURAL	33	< 40 ?	F	158	81	32.45	PRESENT	PRESENT	NO	YES	NO	0.0085	173	4.2	268	1.6	3.9	0.75	66.3	NO	ABSENT	ABSENT	YES	NO	0.53
3.03.034.012	DRAGOMIRESTI	S	RURAL	78	>60	F	153	64	27.34	ABSENT	ABSENT	NO	NO	NO	0.0063	121	3	69	4.3	2.9	0.56	49.5	NO	ABSENT	ABSENT	NO	NO	1.05
3.03.034.013	DRAGOMIRESTI	S	RURAL	53	40-60	F	173	71.5	23.89	ABSENT	ABSENT	NO	YES	NO	0.0054	126	32.2	100	32.2	3	0.48	42.43	NO	ABSENT	ABSENT	NO	NO	0.68
3.03.034.014	DRAGOMIRESTI	S	RURAL	39	< 40 ?	F	164	75	27.89	ABSENT	ABSENT	YES	NO	NO	0.0064	134	30.1	177	17	2.6	0.57	50.39	NO	ABSENT	ABSENT	NO	NO	0.78
3.03.034.015	DRAGOMIRESTI	S	RURAL	77	>60	M	170	63	21.8	ABSENT	ABSENT	YES	NO	NO	0.0103	154	13.3	176	7.6	4.9	0.91	80.44	NO	ABSENT	ABSENT	YES	NO	0.95
3.03.034.016	DRAGOMIRESTI	S	RURAL	18	< 40 ?	F	165	54.5	20.02	ABSENT	PRESENT	YES	YES	NO	0.0067	205	3	130	2.3	3.8	0.59	52.16	NO	ABSENT	ABSENT	YES	NO	0.55
3.03.034.017	DRAGOMIRESTI	S	RURAL	37	< 40 ?	F	167	74.5	26.71	ABSENT	ABSENT	NO	YES	NO	0.008	76	3	46	6.5	2.2	0.71	62.76	NO	ABSENT	ABSENT	NO	NO	0.67
3.03.034.018	DRAGOMIRESTI	S	RURAL	44	40-60	F	171	119	40.7	PRESENT	ABSENT	YES	NO	NO	0.0097	52	3.3	120	2.8	4.4	0.86	76.02	NO	ABSENT	ABSENT	NO	NO	0.77
3.03.034.019	DRAGOMIRESTI	S	RURAL	46	40-60	M	180	70	21.6	ABSENT	ABSENT	NO	YES	NO	0.0093	138	13.2	325	4.1	4	0.82	72.49	NO	.	ABSENT	.	0	0.59
3.03.034.021	DRAGOMIRESTI	S	RURAL	24	< 40 ?	M	173	80	26.73	ABSENT	PRESENT	NO	YES	NO	0.0102	172	23	330	7	5.3	0.9	79.56	NO	ABSENT	ABSENT	YES	NO	0.54
3.03.034.022	DRAGOMIRESTI	S	RURAL	24	< 40 ?	M	178	68.9	21.75	ABSENT	ABSENT	NO	YES	NO	0.0096	120	3	98	3.1	4.4	0.85	75.14	NO	ABSENT	ABSENT	YES	NO	0.51
3.03.034.023	DRAGOMIRESTI	S	RURAL	35	< 40 ?	F	164	63	23.42	ABSENT	ABSENT	NO	YES	NO	0.008	74	3	50	6	2.9	0.71	62.76	NO	ABSENT	ABSENT	YES	NO	0.56
3.03.034.024	DRAGOMIRESTI	S	RURAL	25	< 40 ?	M	182	71	21.43	ABSENT	ABSENT	NO	YES	NO	0.0132	83	3	329	0.9	5.9	1.17	103.43	NO	ABSENT	ABSENT	NO	NO	0.53
3.03.034.025	DRAGOMIRESTI	S	RURAL	26	< 40 ?	M	170	57	19.72	ABSENT	PRESENT	NO	NO	NO	0.0098	103	29.9	184	16.3	5	0.87	76.91	NO	ABSENT	ABSENT	NO	NO	0.49
3.04.001.001	GIURGIU	S	URBAN	58	40-60	F	148	52	23.74	ABSENT	ABSENT	NO	YES	NO	0.007	142	3	92	3.3	3	0.62	54.81	.	ABSENT	ABSENT	YES	NO	0.62
3.04.001.003	GIURGIU	S	URBAN	34	< 40 ?	F	160	60	23.44	ABSENT	ABSENT	NO	YES	NO	0.0085	134	4.2	162	2.6	3.8	0.75	66.3	NO	ABSENT	ABSENT	YES	NO	0.5
3.04.001.004	GIURGIU	S	URBAN	69	>60	M	185	105	30.68	PRESENT	ABSENT	NO	YES	NO	0.0085	173	9.8	179	5.5	6.1	0.75	66.3	NO	ABSENT	ABSENT	NO	NO	0.8
3.04.001.005	GIURGIU	S	URBAN	48	40-60	M	178	90	28.41	ABSENT	ABSENT	YES	NO	NO	0.0087	148	5.7	128	4.5	5.2	0.77	68.07	UNKNOWN	ABSENT	ABSENT	NO	NO	0.55
3.04.001.006	GIURGIU	S	URBAN	42	40-60	M	175	86	28.08	ABSENT	PRESENT	YES	YES	NO	0.0096	142	9.7	198	4.9	5.1	0.85	75.14	NO	ABSENT	ABSENT	NO	NO	0.5
3.04.001.007	GIURGIU	S	URBAN	32	< 40 ?	M	165	68	24.98	ABSENT	ABSENT	YES	YES	NO	0.0095	210	3.6	197	1.8	3.9	0.84	74.26	NO	ABSENT	ABSENT	YES	NO	0.64
3.04.001.008	GIURGIU	S	URBAN	75	>60	F	138	51	26.78	ABSENT	PRESENT	NO	NO	YES	0.0096	183	3.7	130	2.8	3.7	0.85	75.14	NO	ABSENT	ABSENT	NO	NO	0.71
3.04.001.009	GIURGIU	S	URBAN	40	40-60	F	160	60	23.44	ABSENT	ABSENT	NO	NO	NO	0.0069	126	7	107	6.5	2.9	0.61	53.92	NO	ABSENT	ABSENT	YES	NO	0.49
3.04.001.011	GIURGIU	S	URBAN	50	40-60	F	178	103	32.51	PRESENT	PRESENT	YES	NO	NO	0.0079	221	8	164	4.9	4.8	0.7	61.88	NO	ABSENT	ABSENT	NO	NO	0.69
3.04.017.001	FLORESTI STOENESTI	S	RURAL	71	>60	F	160	75	29.3	ABSENT	ABSENT	NO	NO	NO	0.0077	191	12.7	127	10	5.1	0.68	60.11	NO	ABSENT	ABSENT	NO	NO	0.76
3.04.017.002	FLORESTI STOENESTI	S	RURAL	60	>60	M	170	88	30.45	PRESENT	ABSENT	YES	NO	NO	0.025	111	216.1	51	423.7	5	2.21	195.36	YES	ABSENT	PRESENT	NO	NO	0.64
3.04.017.003	FLORESTI STOENESTI	S	RURAL	22	< 40 ?	M	173	76.5	25.56	ABSENT	ABSENT	NO	NO	NO	0.0121	140	3	96	3.1	6.1	1.07	94.59	NO	ABSENT	ABSENT	NO	NO	0.58
3.04.017.004	FLORESTI STOENESTI	S	RURAL	73	>60	F	157.5	81	32.65	PRESENT	ABSENT	NO	NO	NO	0.0076	166	19.5	80	24.4	7.1	0.67	59.23	NO	ABSENT	ABSENT	NO	NO	0.84
3.04.017.005	FLORESTI STOENESTI	S	RURAL	42	40-60	F	167	69	24.74	ABSENT	ABSENT	NO	NO	NO	0.0095	71	3	37	8.1	3.4	0.84	74.26	NO	ABSENT	ABSENT	NO	NO	0.55
3.04.017.006	FLORESTI STOENESTI	S	RURAL	34	< 40 ?	F	166	74.5	27.04	ABSENT	ABSENT	NO	YES	NO	0.0082	134	6.7	131	5.1	4	0.73	64.53	YES	ABSENT	PRESENT	NO	NO	0.63
3.04.017.008	FLORESTI STOENESTI	S	RURAL	62	>60	F	167	86	30.84	PRESENT	ABSENT	YES	NO	NO	0.0073	141	21.3	62	34.4	4.7	0.65	57.46	.	ABSENT	ABSENT	NO	NO	0.68
3.04.017.009	FLORESTI STOENESTI	S	RURAL	56	40-60	M	173	96	32.08	PRESENT	PRESENT	YES	NO	NO	0.0102	202	3	128	2.3	7	0.9	79.56	NO	ABSENT	ABSENT	YES	NO	0.91
3.04.017.010	FLORESTI STOENESTI	S	RURAL	66	>60	M	164	84	31.23	PRESENT	ABSENT	YES	NO	NO	0.0094	231	3.6	135	2.7	5.3	0.83	73.37	NO	ABSENT	ABSENT	NO	NO	0.91
3.04.017.011	FLORESTI STOENESTI	S	RURAL	18	< 40 ?	F	174	59	19.49	ABSENT	ABSENT	NO	YES	NO	0.0077	152	8.4	255	3.3	4.4	0.68	60.11	NO	ABSENT	ABSENT	NO	NO	0.92
3.05.001.001	SLOBOZIA	S	URBAN	41	40-60	M	173	98	32.74	PRESENT	ABSENT	YES	NO	NO	0.0098	65	5.7	74	7.7	7	0.87	76.91	NO	ABSENT	ABSENT	NO	NO
3.05.001.002	SLOBOZIA	S	URBAN	55	40-60	M	181	80	24.42	ABSENT	ABSENT	YES	NO	NO	0.0077	132	5.8	111	5.2	4.9	0.68	60.11	NO	ABSENT	ABSENT	NO	NO
3.05.001.003	SLOBOZIA	S	URBAN	64	>60	M	169	66.3	23.21	ABSENT	ABSENT	YES	NO	NO	0.0088	162	5.7	47	12.1	5.8	0.78	68.95	NO	ABSENT	ABSENT	NO	NO
3.05.001.004	SLOBOZIA	S	URBAN	59	40-60	M	167	65	23.31	ABSENT	PRESENT	YES	NO	YES	0.0075	264	17	112	15.2	5.3	0.66	58.34	NO	ABSENT	ABSENT	NO	NO
3.05.001.006	SLOBOZIA	S	URBAN	36	< 40 ?	F	171	53	18.13	ABSENT	ABSENT	NO	YES	NO	0.0085	27	5.9	95	6.2	2.6	0.75	66.3	.	ABSENT	ABSENT	NO	NO
3.05.001.007	SLOBOZIA	S	URBAN	55	40-60	F	165	64.8	23.8	ABSENT	PRESENT	NO	YES	YES	0.0075	88	6.3	156	4	5.8	0.66	58.34	NO	ABSENT	ABSENT	NO	NO
3.05.001.008	SLOBOZIA	S	URBAN	58	40-60	M	175	103	33.63	PRESENT	ABSENT	NO	NO	NO	0.0105	124	5.5	63	8.7	5.3	0.93	82.21	.	PRESENT	PRESENT	NO	NO
3.05.001.009	SLOBOZIA	S	URBAN	80	>60	F	159	80.3	31.76	PRESENT	ABSENT	YES	NO	NO	0.0077	65	5.6	34	16.5	4.5	0.68	60.11	NO	.	ABSENT	.	0
3.05.001.010	SLOBOZIA	S	URBAN	48	40-60	F	168	80	28.34	ABSENT	ABSENT	YES	NO	YES	0.0051	210	5.9	184	3.2	3.3	0.45	39.78	NO	ABSENT	ABSENT	NO	NO
3.05.001.011	SLOBOZIA	S	URBAN	56	40-60	M	176	82.3	26.57	ABSENT	PRESENT	YES	NO	NO	0.0078	200	5.9	99	6	4.2	0.69	61	NO	.	ABSENT	.	0
3.05.001.012	SLOBOZIA	S	URBAN	18	< 40 ?	M	182	72	21.74	ABSENT	ABSENT	NO	YES	NO	0.009	136	50.5	276	18.3	5.8	0.8	70.72	NO	ABSENT	ABSENT	YES	NO
3.05.001.013	SLOBOZIA	S	URBAN	48	40-60	F	157	74.3	30.14	PRESENT	PRESENT	YES	NO	NO	0.0086	151	5.8	84	6.9	4.5	0.76	67.18	NO	ABSENT	ABSENT	NO	NO
3.05.001.014	SLOBOZIA	S	URBAN	29	< 40 ?	F	159	67	26.5	ABSENT	ABSENT	NO	YES	NO	0.0061	212	5.2	64	8.1	3.2	0.54	47.74	NO	ABSENT	ABSENT	NO	NO
3.05.001.015	SLOBOZIA	S	URBAN	44	40-60	F	168	78	27.64	ABSENT	ABSENT	NO	YES	NO	0.0069	245	5.6	61	9.2	3.8	0.61	53.92	NO	ABSENT	ABSENT	NO	NO
3.05.001.016	SLOBOZIA	S	URBAN	79	>60	M	174	72	23.78	ABSENT	ABSENT	NO	YES	NO	0.0114	65	5.3	25	21.2	6.5	1.01	89.28	.	.	ABSENT	.	0
3.05.001.017	SLOBOZIA	S	URBAN	42	40-60	M	179	68	21.22	ABSENT	PRESENT	NO	YES	NO	0.0112	53	5.9	146	4	6.6	0.99	87.52	NO	ABSENT	ABSENT	NO	NO
3.05.001.018	SLOBOZIA	S	URBAN	31	< 40 ?	M	177	86.4	27.58	ABSENT	ABSENT	NO	YES	NO	0.0122	118	6.5	177	3.7	7.3	1.08	95.47	NO	ABSENT	ABSENT	NO	NO
3.05.001.020	SLOBOZIA	S	URBAN	59	40-60	M	178	85	26.83	ABSENT	ABSENT	YES	NO	NO	0.0113	48	5.5	28	19.6	9	1	88.4	NO	ABSENT	ABSENT	NO	NO
3.05.015.001	BARBULESTI	S	RURAL	22	< 40 ?	F	140	55	28.06	ABSENT	ABSENT	NO	YES	NO	0.0069	154	20.1	211	9.5	3.4	0.61	53.92	NO	ABSENT	ABSENT	NO	NO
3.05.015.002	BARBULESTI	S	RURAL	25	< 40 ?	F	154	55	23.19	ABSENT	ABSENT	NO	YES	NO	0.0059	125	8.3	281	3	3.9	0.52	45.97	NO	ABSENT	ABSENT	NO	NO
3.05.015.003	BARBULESTI	S	RURAL	41	40-60	F	148	83.7	38.21	PRESENT	ABSENT	YES	NO	NO	0.0064	165	5.7	93	6.1	3.2	0.57	50.39	NO	ABSENT	ABSENT	NO	NO
3.05.015.004	BARBULESTI	S	RURAL	48	40-60	F	158	76	30.44	PRESENT	ABSENT	NO	YES	NO	0.0077	207	10.6	74	14.3	3.1	0.68	60.11	.	ABSENT	ABSENT	NO	NO
3.05.015.005	BARBULESTI	S	RURAL	65	>60	F	157	93.5	37.93	PRESENT	ABSENT	NO	YES	NO	0.0068	126	16.4	31	52.9	3.6	0.6	53.04	.	ABSENT	ABSENT	NO	NO
3.05.015.006	BARBULESTI	S	RURAL	58	40-60	M	167	55	19.72	ABSENT	PRESENT	NO	NO	NO	0.0085	145	5.6	86	6.5	4.3	0.75	66.3	NO	ABSENT	ABSENT	NO	NO
3.05.015.007	BARBULESTI	S	RURAL	62	>60	F	157	61.6	24.99	ABSENT	PRESENT	YES	YES	NO	0.0061	266	5.8	97	6	3.1	0.54	47.74	NO	ABSENT	ABSENT	NO	NO
3.05.015.009	BARBULESTI	S	RURAL	49	40-60	F	159	78	30.85	PRESENT	ABSENT	YES	NO	NO	0.0068	262	6.3	88	7.2	3.7	0.6	53.04	NO	ABSENT	ABSENT	NO	NO
3.05.015.010	BARBULESTI	S	RURAL	21	< 40 ?	M	180	101	31.17	PRESENT	ABSENT	NO	YES	NO	0.0095	220	5.5	141	3.9	6	0.84	74.26	.	ABSENT	ABSENT	YES	NO
3.05.015.012	BARBULESTI	S	RURAL	53	40-60	M	166	81	29.39	ABSENT	ABSENT	NO	YES	NO	0.0108	107	44.1	246	17.9	4.8	0.96	84.86	NO	ABSENT	ABSENT	NO	NO
3.05.015.014	BARBULESTI	S	RURAL	36	< 40 ?	M	177	110	35.11	PRESENT	ABSENT	YES	NO	NO	0.0096	232	6.2	96	6.5	7.3	0.85	75.14	NO	ABSENT	ABSENT	NO	NO
3.05.015.015	BARBULESTI	S	RURAL	77	>60	F	152	55	23.81	ABSENT	ABSENT	NO	YES	NO	0.0052	103	5.4	27	20	3.8	0.46	40.66	NO	ABSENT	ABSENT	NO	NO
3.05.015.016	BARBULESTI	S	RURAL	66	>60	M	176	88	28.41	ABSENT	PRESENT	YES	NO	NO	0.0107	237	5.9	132	4.5	5.5	0.95	83.98	NO	ABSENT	ABSENT	NO	NO
3.05.015.017	BARBULESTI	S	RURAL	71	>60	F	146	72	33.78	PRESENT	ABSENT	NO	NO	YES	0.0077	129	6.2	35	17.7	2.9	0.68	60.11	NO	ABSENT	ABSENT	NO	NO
3.05.015.018	BARBULESTI	S	RURAL	61	>60	M	174	115	37.98	PRESENT	PRESENT	YES	YES	NO	0.0157	124	410.6	131	313.4	1.9	1.39	122.88	NO	ABSENT	PRESENT	NO	NO
3.06.001.001	PLOIESTI	S	URBAN	75	>60	F	147	64.6	29.89	ABSENT	ABSENT	YES	NO	YES	0.0057	174	3	57	5.3	3	0.5	44.2	NO	ABSENT	ABSENT	NO	NO	1.01
3.06.001.002	PLOIESTI	S	URBAN	72	>60	F	156	73.7	30.28	PRESENT	ABSENT	YES	NO	NO	0.0071	88	15.2	35	43.4	5.9	0.63	55.69	.	ABSENT	ABSENT	YES	NO	0.85
3.06.001.003	PLOIESTI	S	URBAN	21	< 40 ?	F	162	59.6	22.71	ABSENT	ABSENT	NO	YES	NO	0.0098	175	7	230	3	3.9	0.87	76.91	YES	ABSENT	PRESENT	YES	NO	0.43
3.06.001.004	PLOIESTI	S	URBAN	46	40-60	M	176	113.1	36.51	PRESENT	ABSENT	YES	NO	NO	0.0093	103	3.4	190	1.8	6	0.82	72.49	NO	ABSENT	ABSENT	NO	NO	0.68
3.06.001.005	PLOIESTI	S	URBAN	57	40-60	M	163	69.8	26.27	ABSENT	ABSENT	NO	NO	YES	0.0123	139	6.7	270	2.5	4.6	1.09	96.36	NO	ABSENT	ABSENT	NO	NO
3.06.001.006	PLOIESTI	S	URBAN	48	40-60	M	172	85.3	28.83	ABSENT	ABSENT	YES	YES	NO	0.0107	169	3.5	207	1.7	4.7	0.95	83.98	NO	ABSENT	ABSENT	YES	NO	0.64
3.06.001.007	PLOIESTI	S	URBAN	52	40-60	M	164	132.8	49.38	PRESENT	ABSENT	YES	NO	NO	0.0271	82	759	149	509.4	5.6	2.4	212.16	NO	ABSENT	PRESENT	NO	NO	0.73
3.06.001.008	PLOIESTI	S	URBAN	57	40-60	F	159	61.7	24.41	ABSENT	ABSENT	NO	YES	YES	0.0088	70	3	81	3.7	4.3	0.78	68.95	UNKNOWN	ABSENT	ABSENT	NO	NO	0.58
3.06.001.009	PLOIESTI	S	URBAN	48	40-60	F	162	96.9	36.92	PRESENT	PRESENT	NO	YES	NO	0.0077	169	10.4	215	4.8	4.6	0.68	60.11	NO	ABSENT	ABSENT	NO	NO
3.06.001.010	PLOIESTI	S	URBAN	21	< 40 ?	F	169	58.8	20.59	ABSENT	ABSENT	NO	YES	NO	0.008	126	3	76	3.9	3.6	0.71	62.76	NO	ABSENT	ABSENT	NO	NO	0.45
3.06.001.011	PLOIESTI	S	URBAN	21	< 40 ?	F	160	53.7	20.98	ABSENT	ABSENT	NO	YES	NO	0.0062	248	5.2	208	2.5	4.5	0.55	48.62	NO	ABSENT	ABSENT	NO	NO	0.51
3.06.001.012	PLOIESTI	S	URBAN	68	>60	M	173	74.1	24.76	ABSENT	ABSENT	NO	NO	YES	0.0093	158	5.2	150	3.5	4	0.82	72.49	NO	ABSENT	ABSENT	NO	NO	0.8
3.06.001.013	PLOIESTI	S	URBAN	62	>60	F	166	72.1	26.16	ABSENT	ABSENT	YES	YES	NO	0.007	114	3	87	3.4	5.2	0.62	54.81	YES	ABSENT	PRESENT	YES	NO	0.67
3.06.001.014	PLOIESTI	S	URBAN	23	< 40 ?	F	167	62.3	22.34	ABSENT	PRESENT	NO	YES	NO	0.007	87	4	183	2.2	4.2	0.62	54.81	NO	ABSENT	ABSENT	NO	NO	0.49
3.06.001.015	PLOIESTI	S	URBAN	80	>60	F	149	59.5	26.8	ABSENT	ABSENT	NO	YES	NO	0.0086	104	3	53	5.7	5.1	0.76	67.18	NO	ABSENT	ABSENT	NO	NO	0.91
3.06.001.016	PLOIESTI	S	URBAN	40	40-60	M	177	90.3	28.82	ABSENT	ABSENT	NO	YES	NO	0.0133	133	7.8	387	2	6	1.18	104.31	NO	ABSENT	ABSENT	NO	NO	0.44
3.06.001.017	PLOIESTI	S	URBAN	74	>60	M	160.5	82.3	31.95	PRESENT	ABSENT	YES	NO	NO	0.0078	0	7	105	6.7	5.8	0.69	61	NO	ABSENT	ABSENT	NO	NO	0.62
3.06.001.018	PLOIESTI	S	URBAN	73	>60	M	171	87.5	29.92	ABSENT	ABSENT	NO	NO	NO	0.0102	149	7.4	180	4.1	4.9	0.9	79.56	NO	ABSENT	ABSENT	NO	NO	1.03
3.06.001.019	PLOIESTI	S	URBAN	47	40-60	F	173	72.2	24.12	ABSENT	PRESENT	YES	NO	NO	0.006	11	3	29	10.3	4.6	0.53	46.85	NO	ABSENT	ABSENT	YES	NO	0.75
3.06.001.020	PLOIESTI	S	URBAN	44	40-60	F	160	65	25.39	ABSENT	PRESENT	NO	YES	NO	0.0055	180	3	84	3.6	3.3	0.49	43.32	NO	ABSENT	ABSENT	NO	NO	0.54
3.06.001.021	PLOIESTI	S	URBAN	75	>60	M	172	77.5	26.2	ABSENT	ABSENT	NO	YES	NO	0.0102	98	3	43	7	4.2	0.9	79.56	NO	ABSENT	ABSENT	YES	NO	0.75
3.06.001.022	PLOIESTI	S	URBAN	46	40-60	M	173	78	26.06	ABSENT	ABSENT	NO	NO	NO	0.0103	65	3	30	10	3.7	0.91	80.44	.	ABSENT	ABSENT	NO	NO	0.63
3.06.001.023	PLOIESTI	S	URBAN	50	40-60	F	156	90	36.98	PRESENT	ABSENT	YES	YES	NO	0.0085	214	3	125	2.4	5.2	0.75	66.3	NO	ABSENT	ABSENT	NO	NO	0.71
3.06.001.024	PLOIESTI	S	URBAN	44	40-60	M	165	82.6	30.34	PRESENT	PRESENT	NO	YES	NO	0.0108	123	144.7	190	76.2	5.4	0.96	84.86	NO	ABSENT	ABSENT	NO	NO	0.73
3.06.001.025	PLOIESTI	S	URBAN	58	40-60	F	166	91.2	33.1	PRESENT	ABSENT	NO	NO	NO	0.0093	71	19.7	293	6.7	4.3	0.82	72.49	NO	ABSENT	ABSENT	UNKNOWN	NO	0.68
3.06.001.026	PLOIESTI	S	URBAN	61	>60	M	171	96.2	32.9	PRESENT	ABSENT	NO	YES	NO	0.009	57	3	62	4.8	5.6	0.8	70.72	NO	ABSENT	ABSENT	NO	NO	0.67
3.06.001.027	PLOIESTI	S	URBAN	77	>60	F	151	78.3	34.34	PRESENT	ABSENT	YES	NO	NO	0.0094	56	6.9	81	8.5	6.3	0.83	73.37	NO	ABSENT	ABSENT	NO	NO	0.88
3.06.001.028	PLOIESTI	S	URBAN	42	40-60	F	162	89.8	34.22	PRESENT	ABSENT	NO	NO	NO	0.0064	173	3.5	85	4.1	3.6	0.57	50.39	NO	ABSENT	ABSENT	YES	NO	0.65
3.06.001.029	PLOIESTI	S	URBAN	54	40-60	F	171	78.5	26.85	ABSENT	ABSENT	NO	YES	YES	0.0085	79	3	106	2.8	5.7	0.75	66.3	NO	ABSENT	ABSENT	NO	NO	0.77
3.06.001.030	PLOIESTI	S	URBAN	30	< 40 ?	M	163	55	20.7	ABSENT	PRESENT	NO	YES	NO	0.0084	70	3	102	2.9	4.4	0.74	65.42	NO	ABSENT	ABSENT	NO	NO	0.59
3.06.001.031	PLOIESTI	S	URBAN	23	< 40 ?	M	181	77	23.5	ABSENT	ABSENT	NO	YES	NO	0.0104	114	18.5	322	5.7	5.3	0.92	81.33	.	ABSENT	ABSENT	NO	NO	0.62
3.06.001.032	PLOIESTI	S	URBAN	39	< 40 ?	F	162.5	61.2	23.18	ABSENT	ABSENT	NO	YES	NO	0.0073	160	3	70	4.3	2.4	0.65	57.46	NO	ABSENT	ABSENT	NO	NO	0.53
3.06.001.033	PLOIESTI	S	URBAN	66	>60	F	154.5	63.2	26.48	ABSENT	ABSENT	YES	NO	NO	0.0079	106	3	45	6.7	2.5	0.7	61.88	NO	ABSENT	ABSENT	NO	NO	0.65
3.06.001.035	PLOIESTI	S	URBAN	21	< 40 ?	F	153	48	20.5	ABSENT	PRESENT	NO	YES	NO	0.008	191	6.2	214	2.9	3.8	0.71	62.76	NO	ABSENT	ABSENT	UNKNOWN	NO	0.51
3.06.001.036	PLOIESTI	S	URBAN	47	40-60	F	159	61.6	24.37	ABSENT	ABSENT	NO	YES	YES	0.0076	188	3	154	1.9	3.9	0.67	59.23	NO	ABSENT	ABSENT	NO	NO	0.61
3.06.001.037	PLOIESTI	S	URBAN	25	< 40 ?	M	170	72	24.91	ABSENT	ABSENT	YES	NO	NO	0.0105	172	3.1	199	1.6	4.2	0.93	82.21	NO	ABSENT	ABSENT	NO	NO	0.51
3.06.001.038	PLOIESTI	S	URBAN	30	< 40 ?	F	161	50.1	19.33	ABSENT	ABSENT	NO	YES	NO	0.0073	38	6.3	178	3.5	3.8	0.65	57.46	NO	ABSENT	ABSENT	NO	NO	0.59
3.06.001.039	PLOIESTI	S	URBAN	47	40-60	F	168	87.5	31	PRESENT	ABSENT	YES	NO	YES	0.0086	148	5.4	123	4.4	4.7	0.76	67.18	NO	ABSENT	ABSENT	YES	NO	0.58
3.06.001.040	PLOIESTI	S	URBAN	48	40-60	M	185	89.4	26.12	ABSENT	ABSENT	NO	NO	NO	0.0121	147	5.7	211	2.7	4.3	1.07	94.59	NO	ABSENT	ABSENT	YES	NO	0.56
3.06.001.041	PLOIESTI	S	URBAN	59	40-60	F	154	79.9	33.69	PRESENT	ABSENT	NO	NO	NO	0.0092	113	4.7	120	3.9	4.2	0.81	71.6	NO	ABSENT	ABSENT	NO	NO	0.57
3.06.001.042	PLOIESTI	S	URBAN	43	40-60	F	162	54	20.58	ABSENT	ABSENT	YES	NO	NO	0.0079	48	3	57	5.3	3.5	0.7	61.88	NO	.	ABSENT	.	0	0.55
3.06.001.043	PLOIESTI	S	URBAN	59	40-60	M	170	82.5	28.55	ABSENT	ABSENT	NO	NO	NO	0.012	91	3	61	4.9	6.6	1.06	93.7	NO	ABSENT	ABSENT	NO	NO	0.51
3.06.001.044	PLOIESTI	S	URBAN	70	>60	M	169	76.1	26.64	ABSENT	ABSENT	YES	NO	NO	0.0179	72	18.6	60	31	6.4	1.58	139.67	NO	ABSENT	ABSENT	NO	NO	0.68
3.06.001.045	PLOIESTI	S	URBAN	56	40-60	F	163	65.8	24.77	ABSENT	ABSENT	NO	YES	YES	0.0099	72	3	34	8.8	5	0.88	77.79	NO	ABSENT	ABSENT	YES	NO	0.82
3.06.001.047	PLOIESTI	S	URBAN	68	>60	F	161.5	79.3	30.4	PRESENT	ABSENT	NO	YES	NO	0.0077	0	2.8	126	2.2	5.2	0.68	60.11	NO	ABSENT	ABSENT	YES	NO
3.06.001.048	PLOIESTI	S	URBAN	72	>60	M	168.5	89.4	31.49	PRESENT	ABSENT	YES	NO	NO	0.0101	159	3	123	2.4	5.1	0.89	78.68	NO	ABSENT	ABSENT	YES	NO	0.86
3.06.001.049	PLOIESTI	S	URBAN	42	40-60	M	174	87.4	28.87	ABSENT	ABSENT	NO	NO	NO	0.0105	49	3	137	2.2	5.2	0.93	82.21	NO	ABSENT	ABSENT	YES	NO	0.61
3.06.001.050	PLOIESTI	S	URBAN	39	< 40 ?	M	181	105.1	32.08	PRESENT	PRESENT	YES	NO	NO	0.0118	83	8.9	276	3.2	6.6	1.04	91.94	NO	ABSENT	ABSENT	YES	NO	0.72
3.06.001.051	PLOIESTI	S	URBAN	37	< 40 ?	M	193	104.9	28.16	ABSENT	ABSENT	NO	YES	NO	0.0119	197	3.3	253	1.3	6	1.05	92.82	NO	ABSENT	ABSENT	NO	NO	0.56
3.06.001.052	PLOIESTI	S	URBAN	31	< 40 ?	F	164	62	23.05	ABSENT	ABSENT	NO	YES	NO	0.0078	145	15.3	265	5.8	2.8	0.69	61	NO	ABSENT	ABSENT	YES	NO	0.48
3.06.001.053	PLOIESTI	S	URBAN	34	< 40 ?	M	172	71	24	ABSENT	PRESENT	NO	YES	NO	0.0095	182	4.4	250	1.8	5.4	0.84	74.26	NO	ABSENT	ABSENT	YES	NO	0.5
3.06.001.054	PLOIESTI	S	URBAN	31	< 40 ?	M	172	71	24	ABSENT	ABSENT	NO	YES	NO	0.0098	132	11	163	6.7	5	0.87	76.91	NO	ABSENT	ABSENT	NO	NO	0.51
3.06.033.001	BUCOV	S	RURAL	65	>60	F	145.5	66.5	31.41	PRESENT	ABSENT	YES	YES	YES	0.007	62	3	51	5.9	6.7	0.62	54.81	NO	ABSENT	ABSENT	NO	NO	0.9
3.06.033.002	BUCOV	S	RURAL	56	40-60	M	173	63.2	21.12	ABSENT	PRESENT	YES	NO	NO	0.0068	129	15.5	42	36.9	3.9	0.6	53.04	NO	ABSENT	ABSENT	YES	NO	0.66
3.06.033.003	BUCOV	S	RURAL	76	>60	F	158	98.5	39.46	PRESENT	ABSENT	YES	YES	NO	0.0079	172	16.6	171	9.7	4.9	0.7	61.88	NO	ABSENT	ABSENT	NO	NO	0.96
3.06.033.004	BUCOV	S	RURAL	76	>60	M	168	76.5	27.1	ABSENT	ABSENT	YES	NO	NO	0.0114	179	3	110	2.7	7.8	1.01	89.28	NO	ABSENT	ABSENT	YES	NO	1.12
3.06.033.005	BUCOV	S	RURAL	48	40-60	F	159	81	32.04	PRESENT	ABSENT	YES	NO	NO	0.0087	130	3	96	3.1	5	0.77	68.07	NO	ABSENT	ABSENT	NO	NO	0.67
3.06.033.006	BUCOV	S	RURAL	35	< 40 ?	F	159.5	54.4	21.38	ABSENT	ABSENT	NO	YES	YES	0.0088	90	149.3	139	107.4	4	0.78	68.95	NO	ABSENT	ABSENT	NO	NO	0.7
3.06.033.007	BUCOV	S	RURAL	41	40-60	F	168.5	85.5	30.11	PRESENT	PRESENT	NO	YES	NO	0.0088	54	6.9	179	3.9	4.3	0.78	68.95	NO	ABSENT	ABSENT	NO	NO	0.76
3.06.033.008	BUCOV	S	RURAL	64	>60	M	156	67.4	27.7	ABSENT	ABSENT	YES	NO	NO	0.0107	70	3	70	4.3	4.2	0.95	83.98	NO	ABSENT	ABSENT	NO	NO	0.73
3.06.033.009	BUCOV	S	RURAL	73	>60	M	161	79	30.48	PRESENT	ABSENT	YES	NO	NO	0.0153	157	92.2	89	103.6	6.3	1.35	119.34	NO	.	ABSENT	.	0	0.63
3.06.033.010	BUCOV	S	RURAL	57	40-60	M	166	64.9	23.55	ABSENT	PRESENT	NO	NO	NO	0.0086	105	9	143	6.3	5.2	0.76	67.18	NO	ABSENT	ABSENT	NO	NO	0.77
3.06.033.011	BUCOV	S	RURAL	52	40-60	F	156	73.5	30.2	PRESENT	ABSENT	NO	NO	NO	0.0057	167	14	105	13.3	2.7	0.5	44.2	NO	ABSENT	ABSENT	NO	NO	0.6
3.06.033.013	BUCOV	S	RURAL	37	< 40 ?	F	169	70.1	24.54	ABSENT	ABSENT	NO	NO	NO	0.0055	181	6.3	114	5.5	3	0.49	43.32	NO	ABSENT	ABSENT	NO	NO	0.65
3.06.033.014	BUCOV	S	RURAL	40	40-60	M	171	105.4	36.05	PRESENT	PRESENT	YES	NO	NO	0.0115	152	8	270	3	7.7	1.02	90.17	NO	ABSENT	ABSENT	NO	NO	0.62
3.06.033.015	BUCOV	S	RURAL	65	>60	F	164	73	27.14	ABSENT	ABSENT	YES	NO	NO	0.0078	140	8.7	155	5.6	4.8	0.69	61	NO	ABSENT	ABSENT	YES	NO	0.69
3.06.033.016	BUCOV	S	RURAL	44	40-60	F	166	73.4	26.64	ABSENT	PRESENT	YES	YES	NO	0.0082	170	3	115	2.6	4.1	0.73	64.53	NO	ABSENT	ABSENT	YES	NO	0.49
3.06.033.017	BUCOV	S	RURAL	28	< 40 ?	F	166	88.4	32.08	PRESENT	ABSENT	YES	YES	NO	0.0082	166	7	164	4.3	3.1	0.73	64.53	NO	ABSENT	ABSENT	NO	NO	0.57
3.06.033.018	BUCOV	S	RURAL	48	40-60	M	182	84.5	25.51	ABSENT	PRESENT	NO	NO	NO	0.0097	110	7.3	240	3	4.7	0.86	76.02	NO	ABSENT	ABSENT	NO	NO	0.74
3.06.033.019	BUCOV	S	RURAL	74	>60	F	158	43.1	17.26	ABSENT	ABSENT	YES	NO	NO	0.0092	123	6.7	202	3.3	4.7	0.81	71.6	NO	ABSENT	ABSENT	NO	NO	0.73
3.06.033.020	BUCOV	S	RURAL	44	40-60	M	177	77.1	24.61	ABSENT	PRESENT	NO	YES	NO	0.0079	28	85	62	137.1	3.5	0.7	61.88	NO	ABSENT	ABSENT	NO	NO	0.58
3.06.033.021	BUCOV	S	RURAL	72	>60	M	168	80.8	28.63	ABSENT	ABSENT	YES	NO	NO	0.0107	185	4.3	84	5.1	4.7	0.95	83.98	NO	ABSENT	ABSENT	NO	NO	0.88
3.06.033.022	BUCOV	S	RURAL	21	< 40 ?	F	166	57.8	20.98	ABSENT	ABSENT	NO	YES	YES	0.0075	85	3.9	149	2.6	3.9	0.66	58.34	NO	ABSENT	ABSENT	NO	NO	0.48
3.06.033.023	BUCOV	S	RURAL	23	< 40 ?	F	154	47.2	19.9	ABSENT	ABSENT	NO	YES	NO	0.0075	140	3	99	3	4.3	0.66	58.34	NO	ABSENT	ABSENT	NO	NO	0.49
3.06.033.024	BUCOV	S	RURAL	34	< 40 ?	F	158	58.4	23.39	ABSENT	ABSENT	YES	YES	NO	0.0085	215	15.2	245	6.2	2.7	0.75	66.3	NO	ABSENT	ABSENT	NO	NO	0.61
3.06.033.025	BUCOV	S	RURAL	33	< 40 ?	F	172	59.5	20.11	ABSENT	ABSENT	NO	YES	NO	0.0076	114	3	99	3	2.5	0.67	59.23	NO	ABSENT	ABSENT	NO	NO	0.6
3.06.033.026	BUCOV	S	RURAL	35	< 40 ?	M	178	80.2	25.31	ABSENT	ABSENT	NO	YES	NO	0.0102	111	3.4	144	2.4	5.9	0.9	79.56	NO	ABSENT	ABSENT	NO	NO	0.63
3.06.033.027	BUCOV	S	RURAL	28	< 40 ?	M	175	92.6	30.24	PRESENT	ABSENT	NO	YES	NO	0.0102	153	3	167	1.8	4.8	0.9	79.56	NO	ABSENT	ABSENT	NO	NO	0.45
3.06.033.028	BUCOV	S	RURAL	34	< 40 ?	M	184	109	32.2	PRESENT	PRESENT	YES	NO	NO	0.008	133	8.7	184	4.7	6.8	0.71	62.76	NO	ABSENT	ABSENT	NO	NO	0.55
3.06.033.029	BUCOV	S	RURAL	23	< 40 ?	M	181	96.9	29.58	ABSENT	PRESENT	NO	NO	YES	0.0097	137	4.3	190	2.3	5.8	0.86	76.02	NO	.	ABSENT	.	0	0.67
3.06.033.030	BUCOV	S	RURAL	49	40-60	M	173.5	72.7	24.15	ABSENT	ABSENT	NO	YES	YES	0.0101	128	3	116	2.6	4.2	0.89	78.68	NO	ABSENT	ABSENT	NO	NO	0.44
3.06.033.032	BUCOV	S	RURAL	79	>60	F	162	96	36.58	PRESENT	ABSENT	YES	NO	NO	0.0088	131	3	73	4.1	5.8	0.78	68.95	NO	ABSENT	ABSENT	NO	NO	0.92
3.07.001.000	ALEXANDRIA	S	URBAN	60	>60	F	161	63.5	24.5	ABSENT	ABSENT	YES	NO	NO	0.0082	121	3	138	2.2	5.7	0.73	64.53	NO	ABSENT	ABSENT	YES	NO
3.07.001.001	ALEXANDRIA	S	URBAN	18	< 40 ?	F	155	72	29.97	ABSENT	PRESENT	NO	YES	NO	0.0086	133	15.6	246	6.3	4.5	0.76	67.18	UNKNOWN	PRESENT	PRESENT	YES	NO	0.76
3.07.001.002	ALEXANDRIA	S	URBAN	35	< 40 ?	M	180	105.8	32.65	PRESENT	PRESENT	NO	YES	NO	0.0095	114	7.9	262	3	5.8	0.84	74.26	NO	ABSENT	ABSENT	NO	NO	0.66
3.07.001.004	ALEXANDRIA	S	URBAN	19	< 40 ?	F	155	61	25.39	ABSENT	PRESENT	NO	YES	YES	0.0067	202	3	108	2.8	3.5	0.59	52.16	NO	ABSENT	ABSENT	NO	NO	0.55
3.07.001.005	ALEXANDRIA	S	URBAN	55	40-60	F	157	122	49.49	PRESENT	ABSENT	YES	NO	NO	0.0064	152	15.3	49	31.2	3.5	0.57	50.39	NO	ABSENT	ABSENT	YES	NO	0.85
3.07.001.006	ALEXANDRIA	S	URBAN	51	40-60	M	167	75	26.89	ABSENT	PRESENT	NO	YES	NO	0.0125	245	3	137	2.2	5.3	1.11	98.12	YES	ABSENT	PRESENT	NO	NO	0.65
3.07.001.007	ALEXANDRIA	S	URBAN	71	>60	M	170	83	28.72	ABSENT	ABSENT	NO	YES	NO	0.0101	65	4.8	79	6.1	5.1	0.89	78.68	NO	ABSENT	ABSENT	NO	NO	0.89
3.07.001.008	ALEXANDRIA	S	URBAN	53	40-60	M	178	70	22.09	ABSENT	ABSENT	NO	NO	NO	0.0102	141	6.1	271	2.3	4.5	0.9	79.56	NO	.	ABSENT	.	0	0.68
3.07.001.009	ALEXANDRIA	S	URBAN	62	>60	M	175	75	24.49	ABSENT	ABSENT	YES	NO	NO	0.0097	141	8.1	202	4	7.6	0.86	76.02	NO	ABSENT	ABSENT	NO	NO	0.83
3.07.001.010	ALEXANDRIA	S	URBAN	59	40-60	M	179	85.7	26.75	ABSENT	PRESENT	NO	YES	NO	0.0076	177	5.5	189	2.9	6.6	0.67	59.23	NO	ABSENT	ABSENT	NO	NO	0.71
3.07.001.011	ALEXANDRIA	S	URBAN	40	40-60	F	147	68.8	31.84	PRESENT	ABSENT	NO	YES	NO	0.007	118	3	121	2.5	4.4	0.62	54.81	NO	ABSENT	ABSENT	NO	NO	0.55
3.07.001.012	ALEXANDRIA	S	URBAN	79	>60	M	170	94.5	32.7	PRESENT	ABSENT	YES	NO	YES	0.015	125	19.4	218	8.9	3.6	1.33	117.57	NO	ABSENT	ABSENT	NO	NO	0.79
3.07.001.013	ALEXANDRIA	S	URBAN	49	40-60	F	162	73	27.82	ABSENT	ABSENT	YES	YES	NO	0.0073	109	8.1	107	7.6	5.3	0.65	57.46	NO	ABSENT	ABSENT	YES	NO	0.67
3.07.001.014	ALEXANDRIA	S	URBAN	69	>60	F	152	90	38.95	PRESENT	ABSENT	YES	NO	YES	0.0064	103	8.5	69	12.3	4.9	0.57	50.39	NO	ABSENT	ABSENT	NO	NO	0.83
3.07.001.015	ALEXANDRIA	S	URBAN	79	>60	F	155	55	22.89	ABSENT	ABSENT	NO	NO	NO	0.0092	40	3	42	7.1	4.4	0.81	71.6	NO	ABSENT	ABSENT	NO	NO	0.82
3.07.001.016	ALEXANDRIA	S	URBAN	27	< 40 ?	M	174	69	22.79	ABSENT	ABSENT	NO	YES	NO	0.0107	231	3	196	1.5	4.2	0.95	83.98	NO	ABSENT	ABSENT	NO	NO	0.52
3.07.001.017	ALEXANDRIA	S	URBAN	44	40-60	F	166	81	29.39	ABSENT	ABSENT	YES	YES	NO	0.0073	167	3	47	6.4	2.6	0.65	57.46	NO	ABSENT	ABSENT	NO	NO	0.57
3.07.001.018	ALEXANDRIA	S	URBAN	31	< 40 ?	F	172	56	18.93	ABSENT	ABSENT	NO	YES	NO	0.0084	113	3	140	2.1	4.2	0.74	65.42	NO	ABSENT	ABSENT	YES	NO	0.51
3.07.001.020	ALEXANDRIA	S	URBAN	18	< 40 ?	M	166	48.5	17.6	ABSENT	PRESENT	NO	YES	NO	0.0069	0	20.3	261	7.8	3.6	0.61	53.92	NO	ABSENT	ABSENT	NO	NO	0.46
3.07.001.021	ALEXANDRIA	S	URBAN	53	40-60	F	163	66	24.84	ABSENT	ABSENT	NO	YES	NO	0.0069	131	3	39	7.7	2.1	0.61	53.92	NO	.	ABSENT	.	0	0.67
3.07.001.022	ALEXANDRIA	S	URBAN	26	< 40 ?	M	173	83	27.73	ABSENT	PRESENT	NO	YES	NO	0.0123	198	3	194	1.5	5.1	1.09	96.36	NO	ABSENT	ABSENT	YES	NO	0.5
3.07.001.023	ALEXANDRIA	S	URBAN	79	>60	M	176	76	24.54	ABSENT	ABSENT	NO	YES	NO	0.0226	158	3	115	2.6	7.4	2	176.8	NO	ABSENT	ABSENT	NO	NO	0.5
3.07.001.024	ALEXANDRIA	S	URBAN	64	>60	F	154	68.5	28.88	ABSENT	ABSENT	NO	YES	NO	0.008	229	25.4	57	44.6	4.6	0.71	62.76	NO	ABSENT	ABSENT	NO	NO	0.77
3.07.001.025	ALEXANDRIA	S	URBAN	61	>60	M	175	87	28.41	ABSENT	PRESENT	YES	NO	NO	0.0075	120	3	49	6.1	4.1	0.66	58.34	NO	ABSENT	ABSENT	NO	NO	0.7
3.07.001.026	ALEXANDRIA	S	URBAN	66	>60	F	163	62.8	23.64	ABSENT	ABSENT	NO	NO	NO	0.0049	112	3	59	5.1	3	0.43	38.01	NO	ABSENT	ABSENT	NO	NO	0.64
3.07.001.027	ALEXANDRIA	S	URBAN	28	< 40 ?	F	169	55	19.26	ABSENT	ABSENT	NO	YES	NO	0.0076	121	3	150	2	4.2	0.67	59.23	NO	ABSENT	ABSENT	YES	NO	0.6
3.07.058.001	PERETU	S	RURAL	80	>60	F	142	76	37.69	PRESENT	ABSENT	NO	NO	NO	0.0082	195	27.3	78	35	4	0.73	64.53	UNKNOWN	ABSENT	ABSENT	NO	NO	0.78
3.07.058.002	PERETU	S	RURAL	50	40-60	F	155	81	33.71	PRESENT	ABSENT	NO	YES	NO	0.0069	157	9.4	150	6.3	2.7	0.61	53.92	NO	.	ABSENT	.	0	0.71
3.07.058.003	PERETU	S	RURAL	30	< 40 ?	M	181	54	16.48	ABSENT	PRESENT	NO	YES	NO	0.0087	51	4.2	125	3.4	2.6	0.77	68.07	NO	ABSENT	ABSENT	NO	NO	0.51
3.07.058.004	PERETU	S	RURAL	34	< 40 ?	F	147	81.5	37.72	PRESENT	ABSENT	NO	NO	YES	0.0052	247	7	78	9	3.8	0.46	40.66	NO	ABSENT	ABSENT	NO	NO	0.53
3.07.058.005	PERETU	S	RURAL	59	40-60	F	145	102	48.51	PRESENT	ABSENT	YES	NO	NO	0.0061	177	13.7	43	31.9	5.6	0.54	47.74	YES	ABSENT	PRESENT	NO	NO	1
3.07.058.006	PERETU	S	RURAL	66	>60	M	162	72	27.43	ABSENT	ABSENT	YES	NO	NO	0.0111	147	3	120	2.5	5.4	0.98	86.63	UNKNOWN	ABSENT	ABSENT	NO	NO	0.78
3.07.058.007	PERETU	S	RURAL	47	40-60	F	168	78.5	27.81	ABSENT	ABSENT	NO	YES	NO	0.0064	112	3	103	2.9	4.5	0.57	50.39	NO	ABSENT	ABSENT	YES	NO	0.73
3.07.058.008	PERETU	S	RURAL	55	40-60	M	168	74	26.22	ABSENT	PRESENT	YES	NO	NO	0.0096	108	5.6	138	4.1	5.6	0.85	75.14	NO	ABSENT	ABSENT	NO	NO	0.68
3.07.058.009	PERETU	S	RURAL	42	40-60	M	171	77	26.33	ABSENT	PRESENT	NO	NO	NO	0.0112	189	3	187	1.6	5.8	0.99	87.52	NO	ABSENT	ABSENT	YES	NO	0.56
3.07.058.010	PERETU	S	RURAL	44	40-60	F	162	100	38.1	PRESENT	ABSENT	YES	NO	NO	0.0057	128	3	131	2.3	4.8	0.5	44.2	NO	.	ABSENT	.	0	0.68
3.07.058.011	PERETU	S	RURAL	46	40-60	M	177	88	28.09	ABSENT	ABSENT	YES	NO	NO	0.0094	80	3	89	3.4	5.9	0.83	73.37	NO	.	ABSENT	.	0	0.55
3.07.058.012	PERETU	S	RURAL	68	>60	F	153	63	26.91	ABSENT	ABSENT	YES	YES	NO	0.0087	212	10	215	4.7	3.2	0.77	68.07	NO	ABSENT	ABSENT	NO	NO	0.66
3.07.058.013	PERETU	S	RURAL	22	< 40 ?	M	177	77	24.58	ABSENT	ABSENT	NO	NO	NO	0.0084	89	17	343	5	6.9	0.74	65.42	NO	ABSENT	ABSENT	NO	NO	0.57
3.07.058.014	PERETU	S	RURAL	41	40-60	M	190	88.5	24.52	ABSENT	ABSENT	YES	YES	NO	0.0092	195	3.4	102	3.3	4.5	0.81	71.6	NO	ABSENT	ABSENT	NO	NO	0.54
3.07.058.016	PERETU	S	RURAL	76	>60	F	156	71.5	29.38	ABSENT	ABSENT	YES	NO	NO	0.007	102	3	40	7.5	4.3	0.62	54.81	NO	.	ABSENT	.	0	1.01
3.07.058.017	PERETU	S	RURAL	75	>60	M	176	74	23.89	ABSENT	ABSENT	NO	NO	NO	0.0099	222	5.9	82	7.2	2.7	0.88	77.79	NO	ABSENT	ABSENT	NO	NO	0.81
3.07.058.018	PERETU	S	RURAL	75	>60	M	168	87	30.82	PRESENT	ABSENT	YES	NO	NO	0.0086	157	13.8	176	7.8	5.7	0.76	67.18	NO	ABSENT	ABSENT	NO	NO	0.88
3.07.058.019	PERETU	S	RURAL	30	< 40 ?	F	157	58.5	23.73	ABSENT	PRESENT	NO	YES	YES	0.0073	205	8.3	263	3.2	2.9	0.65	57.46	NO	ABSENT	ABSENT	NO	NO	0.73
3.07.058.020	PERETU	S	RURAL	44	40-60	F	148.5	39	17.69	ABSENT	ABSENT	NO	YES	NO	0.0064	229	5	87	5.7	2.4	0.57	50.39	NO	ABSENT	ABSENT	NO	NO	0.49
3.07.058.021	PERETU	S	RURAL	46	40-60	M	171	110	37.62	PRESENT	ABSENT	YES	NO	NO	0.0071	210	3	145	2.1	5.5	0.63	55.69	NO	ABSENT	ABSENT	NO	NO	0.59
4.01.001.001	CRAIOVA	SV	URBAN	42	40-60	F	161	70	27.01	ABSENT	ABSENT	NO	NO	NO	0.0075	159	1.6	79	2	5.6	0.66	58.34	NO	ABSENT	ABSENT	NO	NO	0.57
4.01.001.002	CRAIOVA	SV	URBAN	39	< 40 ?	F	161	63	24.3	ABSENT	ABSENT	NO	YES	NO	0.0075	85	3.9	118	3.3	3.9	0.66	58.34	NO	.	ABSENT	.	0
4.01.001.003	CRAIOVA	SV	URBAN	40	40-60	F	154	73.5	30.99	PRESENT	ABSENT	NO	NO	NO	0.0066	157	7	157	4.5	3.3	0.58	51.27	NO	ABSENT	ABSENT	NO	NO	0.57
4.01.001.004	CRAIOVA	SV	URBAN	40	40-60	M	173	75.5	25.23	ABSENT	ABSENT	NO	NO	NO	0.0079	162	4.8	199	2.4	4.6	0.7	61.88	NO	ABSENT	ABSENT	NO	NO	0.59
4.01.001.005	CRAIOVA	SV	URBAN	49	40-60	F	160	66.1	25.82	ABSENT	ABSENT	NO	NO	NO	0.0082	86	8.6	380	2.3	4.7	0.73	64.53	NO	ABSENT	ABSENT	YES	NO	0.84
4.01.001.006	CRAIOVA	SV	URBAN	19	< 40 ?	F	169	62.3	21.81	ABSENT	ABSENT	NO	NO	NO	0.0053	128	7.7	220	3.5	4.4	0.47	41.55	NO	ABSENT	ABSENT	NO	NO	0.42
4.01.001.007	CRAIOVA	SV	URBAN	54	40-60	M	170	81.8	28.3	ABSENT	PRESENT	NO	YES	NO	0.0084	164	1.2	105	1.1	5.9	0.74	65.42	NO	.	ABSENT	.	0	0.7
4.01.001.008	CRAIOVA	SV	URBAN	51	40-60	M	177.5	99	31.42	PRESENT	ABSENT	YES	NO	NO	0.011	202	4.6	255	1.8	7.3	0.97	85.75	NO	ABSENT	ABSENT	YES	NO	0.66
4.01.001.009	CRAIOVA	SV	URBAN	69	>60	M	166	81.8	29.69	ABSENT	ABSENT	YES	NO	NO	0.0084	114	6.7	68	9.9	6.5	0.74	65.42	NO	ABSENT	ABSENT	NO	NO	0.77
4.01.001.010	CRAIOVA	SV	URBAN	44	40-60	M	176	93.8	30.28	PRESENT	PRESENT	YES	NO	NO	0.0095	149	1	52	1.9	5.1	0.84	74.26	NO	ABSENT	ABSENT	YES	NO	0.61
4.01.001.011	CRAIOVA	SV	URBAN	47	40-60	F	166.5	73.6	26.55	ABSENT	PRESENT	NO	YES	NO	0.0078	92	1.2	115	1	3.4	0.69	61	NO	ABSENT	ABSENT	NO	NO	0.45
4.01.001.012	CRAIOVA	SV	URBAN	64	>60	F	165	76.3	28.03	ABSENT	ABSENT	YES	NO	NO	0.0086	128	2.2	165	1.3	5.3	0.76	67.18	NO	ABSENT	ABSENT	NO	NO	0.59
4.01.001.013	CRAIOVA	SV	URBAN	68	>60	F	162	85	32.39	PRESENT	ABSENT	NO	YES	YES	0.0081	182	2.7	57	4.7	6.2	0.72	63.65	.	ABSENT	ABSENT	NO	NO	0.92
4.01.001.014	CRAIOVA	SV	URBAN	34	< 40 ?	F	158	50.9	20.39	ABSENT	ABSENT	NO	YES	YES	0.0059	67	4.9	167	2.9	3.6	0.52	45.97	NO	ABSENT	ABSENT	NO	NO	0.42
4.01.001.015	CRAIOVA	SV	URBAN	50	40-60	M	178	90.2	28.47	ABSENT	ABSENT	YES	NO	YES	0.0072	218	1.7	130	1.3	4.8	0.64	56.58	NO	ABSENT	ABSENT	NO	NO	0.73
4.01.001.016	CRAIOVA	SV	URBAN	66	>60	M	173	110	36.75	PRESENT	ABSENT	YES	NO	YES	0.0093	123	0.9	80	1.1	8	0.82	72.49	NO	ABSENT	ABSENT	NO	NO	0.77
4.01.001.017	CRAIOVA	SV	URBAN	62	>60	M	173	78.1	26.1	ABSENT	PRESENT	YES	NO	NO	0.0079	176	3.9	276	1.4	5.5	0.7	61.88	NO	ABSENT	ABSENT	YES	NO	0.7
4.01.001.018	CRAIOVA	SV	URBAN	53	40-60	F	157	73	29.62	ABSENT	ABSENT	YES	NO	YES	0.0076	103	1.2	45	2.7	6.1	0.67	59.23	NO	ABSENT	ABSENT	NO	NO	0.55
4.01.001.019	CRAIOVA	SV	URBAN	66	>60	F	158	70.8	28.36	ABSENT	ABSENT	NO	YES	YES	0.0063	157	2.4	76	3.2	5.4	0.56	49.5	NO	ABSENT	ABSENT	NO	NO	0.78
4.01.001.021	CRAIOVA	SV	URBAN	28	< 40 ?	F	173	86.4	28.87	ABSENT	ABSENT	NO	YES	NO	0.0064	145	8.1	119	6.8	5.7	0.57	50.39	NO	ABSENT	ABSENT	YES	NO	0.48
4.01.001.022	CRAIOVA	SV	URBAN	30	< 40 ?	M	178.5	64.9	20.37	ABSENT	ABSENT	NO	YES	NO	0.0069	160	2.1	105	2	4.5	0.61	53.92	NO	ABSENT	ABSENT	YES	NO	0.43
4.01.001.023	CRAIOVA	SV	URBAN	77	>60	M	178	78.7	24.84	ABSENT	ABSENT	YES	NO	NO	0.0113	101	0.4	57	0.7	6.4	1	88.4	NO	ABSENT	ABSENT	NO	NO	0.91
4.01.001.024	CRAIOVA	SV	URBAN	37	< 40 ?	M	172	76	25.69	ABSENT	ABSENT	NO	YES	NO	0.0077	176	2.5	149	1.7	5	0.68	60.11	NO	ABSENT	ABSENT	NO	NO	0.5
4.01.001.025	CRAIOVA	SV	URBAN	80	>60	F	154	76	32.05	PRESENT	ABSENT	YES	NO	NO	0.0093	158	0.8	36	2.2	5.7	0.82	72.49	NO	ABSENT	ABSENT	NO	NO	0.81
4.01.001.026	CRAIOVA	SV	URBAN	79	>60	F	152	82	35.49	PRESENT	ABSENT	NO	NO	YES	0.0097	114	2.3	94	2.4	5.7	0.86	76.02	.	ABSENT	ABSENT	NO	NO	0.9
4.01.001.027	CRAIOVA	SV	URBAN	77	>60	F	159	71	28.08	ABSENT	ABSENT	YES	YES	NO	0.0082	94	3.7	74	5	5.6	0.73	64.53	NO	ABSENT	ABSENT	YES	NO	0.85
4.01.083.002	POYESRI	SV	RURAL	67	>60	F	157	80	32.46	PRESENT	ABSENT	YES	NO	YES	0.0062	124	0.8	21	3.8	4.3	0.55	48.62	NO	ABSENT	ABSENT	NO	NO	0.67
4.01.083.003	POYESRI	SV	RURAL	63	>60	F	150	65.6	29.16	ABSENT	ABSENT	YES	YES	NO	0.0077	157	1.4	76	1.8	4.5	0.68	60.11	NO	ABSENT	ABSENT	NO	NO	0.76
4.01.083.004	POYESRI	SV	RURAL	62	>60	M	174	91	30.06	PRESENT	ABSENT	YES	NO	YES	0.0089	158	2.4	77	3.1	3.7	0.79	69.84	NO	.	ABSENT	.	0	0.9
4.01.083.005	POYESRI	SV	RURAL	65	>60	F	152	52.9	22.9	ABSENT	ABSENT	YES	NO	NO	0.0062	112	1.8	147	1.2	5.6	0.55	48.62	NO	ABSENT	ABSENT	YES	NO	0.6
4.01.083.006	POYESRI	SV	RURAL	67	>60	M	167.5	57.7	20.57	ABSENT	PRESENT	YES	NO	NO	0.0066	77	7.3	73	10	3.9	0.58	51.27	NO	ABSENT	ABSENT	NO	NO	0.77
4.01.083.007	POYESRI	SV	RURAL	37	< 40 ?	F	160	69.6	27.19	ABSENT	ABSENT	YES	YES	NO	0.0053	108	4.8	153	3.1	4	0.47	41.55	UNKNOWN	ABSENT	ABSENT	UNKNOWN	NO	0.57
4.01.083.008	POYESRI	SV	RURAL	70	>60	M	170	83	28.72	ABSENT	PRESENT	YES	NO	YES	0.0067	126	1	79	1.3	5	0.59	52.16	NO	.	ABSENT	.	0
4.01.083.009	POYESRI	SV	RURAL	55	40-60	M	171	119.4	40.83	PRESENT	PRESENT	YES	NO	YES	0.0093	133	22.9	147	15.6	6.1	0.82	72.49	NO	ABSENT	ABSENT	NO	NO	0.94
4.01.083.010	POYESRI	SV	RURAL	42	40-60	F	158	92	36.85	PRESENT	ABSENT	NO	NO	YES	0.0066	194	3.5	131	2.7	6.3	0.58	51.27	.	ABSENT	ABSENT	NO	NO
4.01.083.011	POYESRI	SV	RURAL	23	< 40 ?	F	151.5	67.5	29.41	ABSENT	PRESENT	NO	YES	NO	0.0068	52	1.6	81	2	4.9	0.6	53.04	NO	ABSENT	ABSENT	NO	NO	0.55
4.01.083.012	POYESRI	SV	RURAL	29	< 40 ?	M	170	107	37.02	PRESENT	ABSENT	YES	NO	NO	0.0086	220	2.3	195	1.2	6.4	0.76	67.18	NO	ABSENT	ABSENT	NO	NO
4.01.083.013	POYESRI	SV	RURAL	28	< 40 ?	F	157.5	57.6	23.22	ABSENT	ABSENT	NO	YES	NO	0.0053	124	15.3	267	5.7	3.4	0.47	41.55	NO	.	ABSENT	.	0	0.5
4.01.083.014	POYESRI	SV	RURAL	78	>60	F	147	56.5	26.15	ABSENT	ABSENT	YES	NO	NO	0.0082	103	0.8	29	2.8	5.5	0.73	64.53	NO	ABSENT	ABSENT	NO	NO	0.64
4.01.083.015	POYESRI	SV	RURAL	66	>60	F	157	74.2	30.1	PRESENT	ABSENT	YES	NO	NO	0.0059	227	37.7	143	26.4	3	0.52	45.97	NO	ABSENT	ABSENT	NO	NO	0.62
4.01.083.017	POYESRI	SV	RURAL	33	< 40 ?	F	153	47.2	20.16	ABSENT	ABSENT	NO	YES	NO	0.006	143	9.4	231	4.1	2.2	0.53	46.85	NO	ABSENT	ABSENT	NO	NO	0.39
4.01.083.018	POYESRI	SV	RURAL	32	< 40 ?	M	170.5	77.5	26.66	ABSENT	PRESENT	NO	YES	YES	0.0108	93	3.5	251	1.4	5.1	0.96	84.86	NO	ABSENT	ABSENT	YES	NO	0.49
4.01.083.019	POYESRI	SV	RURAL	21	< 40 ?	F	162	46.4	17.68	ABSENT	ABSENT	NO	YES	YES	0.0063	186	14.2	219	6.5	3.6	0.56	49.5	NO	ABSENT	ABSENT	NO	NO	0.54
4.01.083.020	POYESRI	SV	RURAL	24	< 40 ?	M	171	53.6	18.33	ABSENT	PRESENT	NO	NO	NO	0.0088	71	32.5	305	10.7	4.2	0.78	68.95	NO	ABSENT	ABSENT	NO	NO	0.46
4.01.083.021	POYESRI	SV	RURAL	42	40-60	M	182	71.7	21.65	ABSENT	PRESENT	YES	YES	NO	0.009	85	1.1	143	0.8	5.5	0.8	70.72	NO	ABSENT	ABSENT	NO	NO	0.49
4.01.083.022	POYESRI	SV	RURAL	36	< 40 ?	M	186	79.8	23.07	ABSENT	PRESENT	YES	YES	YES	0.0082	47	1.3	110	1.2	6	0.73	64.53	NO	ABSENT	ABSENT	YES	NO	0.49
4.01.083.023	POYESRI	SV	RURAL	43	40-60	M	192	93	25.23	ABSENT	ABSENT	NO	NO	NO	0.0092	237	13	135	9.6	5.8	0.81	71.6	NO	ABSENT	ABSENT	YES	NO	0.59
4.01.083.024	POYESRI	SV	RURAL	19	< 40 ?	M	163	58	21.83	ABSENT	ABSENT	NO	YES	NO	0.0089	118	17.4	467	3.7	4.4	0.79	69.84	NO	ABSENT	ABSENT	NO	NO	0.45
4.02.001.001	TARGU JIU	SV	URBAN	65	>60	M	174	99	32.7	PRESENT	ABSENT	YES	NO	NO	0.0108	191	3.4	122	2.8	6.7	0.96	84.86	NO	ABSENT	ABSENT	YES	NO	0.55
4.02.001.002	TARGU JIU	SV	URBAN	47	40-60	M	173	99.5	33.25	PRESENT	ABSENT	YES	YES	NO	0.0077	261	1.4	103	1.4	5.2	0.68	60.11	NO	.	ABSENT	.	0	0.45
4.02.001.003	TARGU JIU	SV	URBAN	59	40-60	M	168	50	17.72	ABSENT	ABSENT	YES	YES	NO	0.0082	141	4.4	149	3	4.6	0.73	64.53	NO	ABSENT	ABSENT	UNKNOWN	NO	0.62
4.02.001.004	TARGU JIU	SV	URBAN	71	>60	M	174	83	27.41	ABSENT	ABSENT	YES	NO	NO	0.0069	128	5.8	128	4.5	3.2	0.61	53.92	NO	.	ABSENT	.	0	0.75
4.02.001.005	TARGU JIU	SV	URBAN	78	>60	M	167	87.1	31.23	PRESENT	ABSENT	YES	NO	NO	0.0141	172	96.9	107	90.6	6.3	1.25	110.5	NO	.	ABSENT	.	0	0.74
4.02.001.006	TARGU JIU	SV	URBAN	46	40-60	M	178	101	31.88	PRESENT	PRESENT	NO	YES	YES	0.0088	48	2	118	1.7	5.4	0.78	68.95	NO	ABSENT	ABSENT	YES	NO	0.58
4.02.001.007	TARGU JIU	SV	URBAN	43	40-60	F	160	95	37.11	PRESENT	ABSENT	NO	YES	NO	0.0067	172	22.5	126	17.9	3.8	0.59	52.16	NO	ABSENT	ABSENT	NO	NO	0.77
4.02.001.008	TARGU JIU	SV	URBAN	32	< 40 ?	M	160	53	20.7	ABSENT	ABSENT	YES	YES	NO	0.008	90	4.2	122	3.4	2.8	0.71	62.76	NO	.	ABSENT	.	0	0.5
4.02.001.009	TARGU JIU	SV	URBAN	48	40-60	M	174	79	26.09	ABSENT	ABSENT	YES	NO	NO	0.0087	277	2.8	170	1.6	4.9	0.77	68.07	NO	ABSENT	ABSENT	NO	NO	0.53
4.02.001.010	TARGU JIU	SV	URBAN	55	40-60	F	159	68.6	27.14	ABSENT	ABSENT	NO	NO	YES	0.0064	86	1.2	28	4.3	2.2	0.57	50.39	NO	ABSENT	ABSENT	YES	NO	0.54
4.02.001.011	TARGU JIU	SV	URBAN	58	40-60	M	175	92	30.04	PRESENT	ABSENT	YES	NO	YES	0.0115	171	5.9	187	3.2	7.2	1.02	90.17	NO	ABSENT	ABSENT	NO	NO	0.64
4.02.001.012	TARGU JIU	SV	URBAN	75	>60	M	175	76	24.82	ABSENT	ABSENT	YES	NO	NO	0.0182	55	2	51	3.9	13.2	1.61	142.32	NO	ABSENT	ABSENT	NO	NO	0.65
4.02.001.013	TARGU JIU	SV	URBAN	50	40-60	F	156	82.7	33.98	PRESENT	ABSENT	NO	NO	YES	0.0069	312	2.6	126	2.1	2.4	0.61	53.92	NO	ABSENT	ABSENT	NO	NO	0.58
4.02.001.014	TARGU JIU	SV	URBAN	79	>60	F	155	68	28.3	ABSENT	ABSENT	YES	NO	NO	0.0107	144	1.5	49	3.1	3.9	0.95	83.98	.	ABSENT	ABSENT	NO	NO	0.72
4.02.001.015	TARGU JIU	SV	URBAN	66	>60	F	156	70	28.76	ABSENT	ABSENT	YES	NO	NO	0.0068	151	1.6	91	1.8	5.4	0.6	53.04	NO	ABSENT	ABSENT	NO	NO	0.55
4.02.001.018	TARGU JIU	SV	URBAN	73	>60	F	161	68	26.23	ABSENT	ABSENT	NO	NO	YES	0.0095	130	2.6	123	2.1	5.7	0.84	74.26	NO	ABSENT	ABSENT	NO	NO	0.63
4.02.001.019	TARGU JIU	SV	URBAN	67	>60	M	180	111	34.26	PRESENT	PRESENT	NO	NO	NO	0.0118	198	2.2	125	1.8	4.6	1.04	91.94	NO	ABSENT	ABSENT	NO	NO	0.65
4.02.001.020	TARGU JIU	SV	URBAN	58	40-60	F	160	66	25.78	ABSENT	ABSENT	NO	YES	NO	0.008	80	1	78	1.3	4.2	0.71	62.76	NO	ABSENT	ABSENT	NO	NO
4.02.001.021	TARGU JIU	SV	URBAN	47	40-60	M	182	69	20.83	ABSENT	PRESENT	YES	NO	NO	0.0102	98	2	109	1.8	4.7	0.9	79.56	NO	ABSENT	ABSENT	NO	NO
4.02.001.022	TARGU JIU	SV	URBAN	42	40-60	F	164	57	21.19	ABSENT	ABSENT	NO	NO	YES	0.0073	144	1.1	100	1.1	4.7	0.65	57.46	NO	ABSENT	ABSENT	NO	NO	0.46
4.02.001.023	TARGU JIU	SV	URBAN	38	< 40 ?	F	162	53	20.2	ABSENT	ABSENT	NO	YES	NO	0.0076	89	1.3	74	1.8	3.2	0.67	59.23	NO	ABSENT	ABSENT	NO	NO	0.55
4.02.001.024	TARGU JIU	SV	URBAN	23	< 40 ?	F	164	53	19.71	ABSENT	ABSENT	NO	YES	NO	0.0088	130	4.7	240	2	4.6	0.78	68.95	NO	ABSENT	ABSENT	NO	NO	0.48
4.02.001.025	TARGU JIU	SV	URBAN	28	< 40 ?	F	155	59.6	24.81	ABSENT	ABSENT	YES	YES	NO	0.0068	266	10.7	188	5.7	3.8	0.6	53.04	NO	.	ABSENT	.	0	0.45
4.02.001.026	TARGU JIU	SV	URBAN	42	40-60	M	178	83.4	26.32	ABSENT	ABSENT	YES	YES	NO	0.0102	80	3.6	156	2.3	6.4	0.9	79.56	NO	ABSENT	ABSENT	NO	NO	0.55
4.02.001.027	TARGU JIU	SV	URBAN	35	< 40 ?	M	185	78	22.79	ABSENT	ABSENT	NO	YES	NO	0.0125	262	7	362	1.9	6.4	1.11	98.12	NO	ABSENT	ABSENT	NO	NO	0.54
4.02.001.028	TARGU JIU	SV	URBAN	57	40-60	F	160	60	23.44	ABSENT	ABSENT	NO	YES	NO	0.0068	75	1.1	54	2	5.1	0.6	53.04	NO	ABSENT	ABSENT	NO	NO	0.82
4.02.001.029	TARGU JIU	SV	URBAN	67	>60	F	160	67	26.17	ABSENT	ABSENT	YES	NO	NO	0.0067	81	1.3	50	2.6	5.3	0.59	52.16	NO	ABSENT	ABSENT	NO	NO	0.8
4.02.001.031	TARGU JIU	SV	URBAN	61	>60	M	185	78	22.79	ABSENT	ABSENT	NO	YES	NO	0.0092	200	9.2	157	5.9	4	0.81	71.6	NO	ABSENT	ABSENT	NO	NO	0.57
4.02.001.032	TARGU JIU	SV	URBAN	80	>60	M	172	65	21.97	ABSENT	ABSENT	YES	NO	NO	0.0167	148	245.3	15	1635.3	6.3	1.48	130.83	YES	ABSENT	PRESENT	YES	NO	0.8
4.02.016.001	BALESTI	SV	RURAL	46	40-60	F	163	82	30.86	PRESENT	ABSENT	NO	NO	NO	0.0066	78	7.2	187	3.9	1.7	0.58	51.27	NO	ABSENT	ABSENT	NO	NO	0.51
4.02.016.002	BALESTI	SV	RURAL	64	>60	F	165	84	30.85	PRESENT	ABSENT	YES	NO	NO	0.0053	143	1.1	35	3.1	5.9	0.47	41.55	NO	ABSENT	ABSENT	NO	NO	0.75
4.02.016.003	BALESTI	SV	RURAL	53	40-60	F	170	97	33.56	PRESENT	ABSENT	NO	YES	NO	0.0085	192	2.1	171	1.2	5.2	0.75	66.3	NO	ABSENT	ABSENT	NO	NO	0.53
4.02.016.004	BALESTI	SV	RURAL	48	40-60	M	178	83	26.2	ABSENT	ABSENT	YES	NO	YES	0.0097	231	5	181	2.8	4.4	0.86	76.02	.	ABSENT	ABSENT	NO	NO	0.63
4.02.016.005	BALESTI	SV	RURAL	43	40-60	M	182	81	24.45	ABSENT	ABSENT	YES	NO	NO	0.0119	164	1.1	138	0.8	6.6	1.05	92.82	NO	ABSENT	ABSENT	NO	NO	0.58
4.02.016.006	BALESTI	SV	RURAL	18	< 40 ?	F	163	65	24.46	ABSENT	ABSENT	NO	YES	YES	0.0062	193	4.4	248	1.8	5.2	0.55	48.62	NO	ABSENT	ABSENT	NO	NO	0.5
4.02.016.007	BALESTI	SV	RURAL	59	40-60	F	175	84	27.43	ABSENT	ABSENT	YES	NO	NO	0.0099	184	1	83	1.2	6.1	0.88	77.79	NO	.	ABSENT	.	0	0.67
4.02.016.008	BALESTI	SV	RURAL	18	< 40 ?	M	175	61	19.92	ABSENT	ABSENT	NO	YES	NO	0.0112	166	1.1	155	0.7	5.8	0.99	87.52	NO	ABSENT	ABSENT	NO	NO	0.41
4.02.016.009	BALESTI	SV	RURAL	60	>60	M	171	145	49.59	PRESENT	ABSENT	YES	NO	NO	0.0113	76	3.4	121	2.8	6.2	1	88.4	NO	ABSENT	ABSENT	NO	NO
4.02.016.010	BALESTI	SV	RURAL	75	>60	M	162	73	27.82	ABSENT	ABSENT	YES	NO	NO	0.0096	271	39.5	78	50.6	3.6	0.85	75.14	NO	ABSENT	ABSENT	NO	NO	0.84
4.02.016.011	BALESTI	SV	RURAL	18	< 40 ?	M	173	58	19.38	ABSENT	PRESENT	NO	YES	NO	0.0084	73	6.4	258	2.5	5.8	0.74	65.42	NO	ABSENT	ABSENT	NO	NO	0.53
4.02.016.012	BALESTI	SV	RURAL	19	< 40 ?	F	169	46	16.11	ABSENT	PRESENT	NO	NO	NO	0.009	139	1.4	92	1.5	2.9	0.8	70.72	NO	ABSENT	ABSENT	NO	NO	0.48
4.02.016.013	BALESTI	SV	RURAL	80	>60	M	173	88	29.4	ABSENT	ABSENT	YES	YES	NO	0.0115	236	27.5	80	34.4	4.3	1.02	90.17	NO	ABSENT	ABSENT	NO	NO	0.77
4.02.016.014	BALESTI	SV	RURAL	73	>60	M	173	55	18.38	ABSENT	ABSENT	YES	NO	NO	0.0096	131	2.3	40	5.8	3.6	0.85	75.14	NO	ABSENT	ABSENT	NO	NO	0.8
4.02.016.015	BALESTI	SV	RURAL	76	>60	M	172	79	26.7	ABSENT	ABSENT	NO	NO	YES	0.0111	70	1.8	140	1.3	7.2	0.98	86.63	NO	ABSENT	ABSENT	NO	NO	0.85
4.02.016.016	BALESTI	SV	RURAL	77	>60	F	155	60	24.97	ABSENT	ABSENT	NO	NO	NO	0.0206	70	25.9	71	36.5	9.3	1.82	160.89	NO	ABSENT	ABSENT	NO	NO	0.98
4.02.016.017	BALESTI	SV	RURAL	41	40-60	M	182	106	32	PRESENT	ABSENT	YES	NO	NO	0.0108	113	56.1	160	35.1	7.8	0.96	84.86	NO	.	ABSENT	.	0	0.73
4.02.016.018	BALESTI	SV	RURAL	34	< 40 ?	F	157	69	27.99	ABSENT	ABSENT	YES	NO	YES	0.0062	97	2.2	91	2.4	4.9	0.55	48.62	NO	ABSENT	ABSENT	NO	NO	0.49
4.02.016.019	BALESTI	SV	RURAL	28	< 40 ?	M	184	90	26.58	ABSENT	ABSENT	YES	YES	YES	0.0094	153	4.7	213	2.2	4.5	0.83	73.37	.	ABSENT	ABSENT	NO	NO	0.53
4.02.016.020	BALESTI	SV	RURAL	70	>60	F	165	57	20.94	ABSENT	ABSENT	YES	NO	NO	0.011	73	0.9	24	3.8	5.3	0.97	85.75	NO	ABSENT	ABSENT	NO	NO	0.76
4.03.001.001	DROBETA TURNO SEVERIN	SV	URBAN	57	40-60	F	157	86.6	35.13	PRESENT	ABSENT	NO	NO	NO	0.0081	115	0.7	47	1.5	4.2	0.72	63.65	.	ABSENT	ABSENT	NO	NO	0.52
4.03.001.002	DROBETA TURNO SEVERIN	SV	URBAN	59	40-60	M	173	108	36.09	PRESENT	PRESENT	YES	NO	NO	0.0092	138	14.1	93	15.2	5.9	0.81	71.6	NO	ABSENT	ABSENT	NO	NO	0.53
4.03.001.003	DROBETA TURNO SEVERIN	SV	URBAN	71	>60	F	163.5	72.7	27.2	ABSENT	ABSENT	NO	NO	NO	0.007	223	28.1	94	29.9	3.9	0.62	54.81	NO	ABSENT	ABSENT	NO	NO	0.58
4.03.001.004	DROBETA TURNO SEVERIN	SV	URBAN	61	>60	M	166	71	25.77	ABSENT	ABSENT	NO	NO	YES	0.0089	97	1.1	77	1.4	3.8	0.79	69.84	.	ABSENT	ABSENT	NO	NO	0.51
4.03.001.005	DROBETA TURNO SEVERIN	SV	URBAN	45	40-60	F	162	76.5	29.15	ABSENT	ABSENT	YES	NO	NO	0.0064	75	4.2	178	2.4	3.7	0.57	50.39	NO	ABSENT	ABSENT	NO	NO	0.58
4.03.001.006	DROBETA TURNO SEVERIN	SV	URBAN	44	40-60	M	182	84	25.36	ABSENT	PRESENT	NO	NO	NO	0.0084	146	1.5	122	1.2	4.3	0.74	65.42	NO	ABSENT	ABSENT	NO	NO	0.48
4.03.001.007	DROBETA TURNO SEVERIN	SV	URBAN	46	40-60	M	172	116	39.21	PRESENT	ABSENT	NO	NO	NO	0.0104	202	0.6	167	0.4	6.3	0.92	81.33	NO	ABSENT	ABSENT	NO	NO	0.91
4.03.001.008	DROBETA TURNO SEVERIN	SV	URBAN	36	< 40 ?	F	155	63.4	26.39	ABSENT	ABSENT	NO	YES	NO	0.0072	81	3.5	86	4.1	4.5	0.64	56.58	NO	ABSENT	ABSENT	NO	NO	0.46
4.03.001.009	DROBETA TURNO SEVERIN	SV	URBAN	43	40-60	F	168	81	28.7	ABSENT	ABSENT	NO	YES	NO	0.007	176	22.9	329	7	3.3	0.62	54.81	.	ABSENT	ABSENT	NO	NO	0.5
4.03.001.010	DROBETA TURNO SEVERIN	SV	URBAN	57	40-60	M	165	85.7	31.48	PRESENT	ABSENT	YES	NO	NO	0.0127	164	1	81	1.2	6.7	1.12	99.01	NO	ABSENT	ABSENT	NO	NO	0.57
4.03.001.011	DROBETA TURNO SEVERIN	SV	URBAN	67	>60	M	168	109	38.62	PRESENT	PRESENT	YES	NO	YES	0.0086	98	6.6	106	6.2	6.6	0.76	67.18	NO	ABSENT	ABSENT	NO	NO	0.79
4.03.001.012	DROBETA TURNO SEVERIN	SV	URBAN	34	< 40 ?	F	161	53	20.45	ABSENT	PRESENT	NO	YES	NO	0.006	119	1	57	1.8	2.4	0.53	46.85	NO	ABSENT	ABSENT	NO	NO	0.44
4.03.001.013	DROBETA TURNO SEVERIN	SV	URBAN	30	< 40 ?	F	164.5	74.2	27.42	ABSENT	PRESENT	YES	NO	YES	0.0064	139	2.4	169	1.4	3.9	0.57	50.39	NO	ABSENT	ABSENT	NO	NO	0.45
4.03.001.015	DROBETA TURNO SEVERIN	SV	URBAN	80	>60	M	167	72	25.82	ABSENT	ABSENT	NO	YES	YES	0.0071	202	26	177	14.7	5	0.63	55.69	UNKNOWN	ABSENT	ABSENT	YES	NO	0.78
4.03.001.016	DROBETA TURNO SEVERIN	SV	URBAN	76	>60	M	170	80.8	27.96	ABSENT	ABSENT	YES	NO	NO	0.0138	131	1.8	63	2.9	5.7	1.22	107.85	NO	ABSENT	ABSENT	YES	NO	0.89
4.03.001.018	DROBETA TURNO SEVERIN	SV	URBAN	18	< 40 ?	F	156	57	23.42	ABSENT	ABSENT	YES	YES	NO	0.0063	230	27.9	219	12.7	2.6	0.56	49.5	NO	ABSENT	ABSENT	NO	NO	0.4
4.03.001.019	DROBETA TURNO SEVERIN	SV	URBAN	69	>60	F	157	83	33.67	PRESENT	ABSENT	NO	NO	YES	0.0067	105	1.7	51	3.3	3.8	0.59	52.16	NO	ABSENT	ABSENT	NO	NO	0.63
4.03.001.020	DROBETA TURNO SEVERIN	SV	URBAN	72	>60	F	152	59.5	25.75	ABSENT	ABSENT	YES	NO	NO	0.0055	250	7.9	53	14.9	3.3	0.49	43.32	NO	ABSENT	ABSENT	NO	NO	0.78
4.03.001.021	DROBETA TURNO SEVERIN	SV	URBAN	22	< 40 ?	F	162	54	20.58	ABSENT	PRESENT	NO	YES	NO	0.0066	194	29.5	297	9.9	3.2	0.58	51.27	NO	ABSENT	ABSENT	NO	NO	0.43
4.03.001.022	DROBETA TURNO SEVERIN	SV	URBAN	66	>60	M	169	98.7	34.56	PRESENT	ABSENT	YES	NO	NO	0.009	221	0.7	86	0.8	5	0.8	70.72	NO	ABSENT	ABSENT	NO	NO	0.9
4.03.001.023	DROBETA TURNO SEVERIN	SV	URBAN	19	< 40 ?	M	166	55.2	20.03	ABSENT	ABSENT	YES	NO	YES	0.0092	152	2.8	211	1.3	4.6	0.81	71.6	NO	ABSENT	ABSENT	NO	NO	0.54
4.03.001.024	DROBETA TURNO SEVERIN	SV	URBAN	59	40-60	F	150	57.5	25.56	ABSENT	ABSENT	NO	NO	NO	0.0061	146	0.9	68	1.3	3.1	0.54	47.74	NO	ABSENT	ABSENT	NO	NO	0.73
4.03.001.025	DROBETA TURNO SEVERIN	SV	URBAN	30	< 40 ?	M	167	89.2	31.98	PRESENT	ABSENT	NO	NO	NO	0.0095	137	6.4	420	1.5	4	0.84	74.26	NO	.	ABSENT	.	0	0.49
4.03.059.001	SIMIAN	SV	RURAL	76	>60	F	156	92	37.8	PRESENT	ABSENT	YES	NO	NO	0.0071	103	1.1	49	2.2	6.2	0.63	55.69	NO	ABSENT	ABSENT	NO	NO	1.1
4.03.059.002	SIMIAN	SV	RURAL	79	>60	M	164	68.9	25.62	ABSENT	ABSENT	YES	NO	NO	0.0131	120	19.4	149	13	5.4	1.16	102.54	.	ABSENT	ABSENT	NO	NO	0.87
4.03.059.003	SIMIAN	SV	RURAL	56	40-60	M	167	84	30.12	PRESENT	ABSENT	NO	NO	NO	0.0084	133	4.1	109	3.8	6.5	0.74	65.42	NO	ABSENT	ABSENT	NO	NO	0.58
4.03.059.004	SIMIAN	SV	RURAL	44	40-60	F	166	68	24.68	ABSENT	PRESENT	NO	YES	NO	0.0069	201	6.5	171	3.8	4.8	0.61	53.92	NO	ABSENT	ABSENT	NO	NO	0.49
4.03.059.005	SIMIAN	SV	RURAL	51	40-60	F	167	71.8	25.74	ABSENT	PRESENT	YES	NO	YES	0.0076	172	6.9	180	3.8	4.3	0.67	59.23	NO	ABSENT	ABSENT	NO	NO	0.52
4.03.059.007	SIMIAN	SV	RURAL	62	>60	F	159	105	41.53	PRESENT	ABSENT	YES	NO	NO	0.0072	148	1217.4	73	1667.7	4.2	0.64	56.58	.	ABSENT	PRESENT	NO	NO	0.53
4.03.059.008	SIMIAN	SV	RURAL	72	>60	F	156	62	25.48	ABSENT	ABSENT	YES	NO	NO	0.0068	150	15.3	72	21.3	2.8	0.6	53.04	NO	ABSENT	ABSENT	NO	NO	0.74
4.03.059.009	SIMIAN	SV	RURAL	76	>60	M	162	85.4	32.54	PRESENT	ABSENT	YES	NO	NO	0.013	117	10.4	71	14.6	6.7	1.15	101.66	NO	ABSENT	ABSENT	NO	NO	0.9
4.03.059.010	SIMIAN	SV	RURAL	65	>60	M	162	67	25.53	ABSENT	ABSENT	YES	NO	NO	0.0163	116	9.6	103	9.3	9.1	1.44	127.3	NO	ABSENT	ABSENT	NO	NO	0.82
4.03.059.011	SIMIAN	SV	RURAL	47	40-60	F	160	61.7	24.1	ABSENT	PRESENT	YES	YES	NO	0.0078	233	3.9	195	2	3.2	0.69	61	NO	ABSENT	ABSENT	NO	NO	0.52
4.03.059.012	SIMIAN	SV	RURAL	49	40-60	M	177	104	33.2	PRESENT	PRESENT	NO	NO	NO	0.0099	120	3.8	217	1.8	6.2	0.88	77.79	NO	ABSENT	ABSENT	NO	NO	0.62
4.03.059.013	SIMIAN	SV	RURAL	26	< 40 ?	M	162	47.7	18.18	ABSENT	ABSENT	NO	YES	NO	0.0089	90	1.3	40	3.3	4.3	0.79	69.84	NO	ABSENT	ABSENT	NO	NO	0.34
4.03.059.014	SIMIAN	SV	RURAL	49	40-60	F	156	84	34.52	PRESENT	ABSENT	YES	YES	NO	0.0066	197	1	69	1.4	3.1	0.58	51.27	.	ABSENT	ABSENT	NO	NO	0.57
4.03.059.015	SIMIAN	SV	RURAL	48	40-60	M	171	73	24.96	ABSENT	PRESENT	NO	YES	NO	0.011	68	4.1	224	1.8	5.9	0.97	85.75	NO	ABSENT	ABSENT	NO	NO	0.58
4.03.059.016	SIMIAN	SV	RURAL	57	40-60	M	176	101	32.61	PRESENT	ABSENT	NO	NO	NO	0.0092	81	2.1	136	1.5	6.6	0.81	71.6	NO	ABSENT	ABSENT	NO	NO	0.64
4.03.059.017	SIMIAN	SV	RURAL	39	< 40 ?	F	162.5	59.8	22.65	ABSENT	ABSENT	NO	YES	YES	0.0057	113	1.7	94	1.8	4	0.5	44.2	NO	ABSENT	ABSENT	YES	NO	0.46
4.03.059.018	SIMIAN	SV	RURAL	34	< 40 ?	F	165	79	29.02	ABSENT	ABSENT	YES	NO	NO	0.007	141	15.3	111	13.8	4.7	0.62	54.81	.	ABSENT	ABSENT	NO	NO	0.43
4.03.059.019	SIMIAN	SV	RURAL	41	40-60	M	171	89.5	30.61	PRESENT	PRESENT	YES	NO	NO	0.0103	95	6.9	163	4.2	7.7	0.91	80.44	NO	ABSENT	ABSENT	NO	NO	0.64
4.03.059.020	SIMIAN	SV	RURAL	31	< 40 ?	M	174	72.3	23.88	ABSENT	PRESENT	NO	YES	YES	0.0084	127	1.5	67	2.2	5.5	0.74	65.42	NO	ABSENT	ABSENT	NO	NO	0.49
4.04.001.001	SLATINA	SV	URBAN	42	40-60	F	164	62	23.05	ABSENT	ABSENT	YES	NO	NO	0.0077	216	9.5	159	6	5.2	0.68	60.11	NO	.	ABSENT	.	0	0.51
4.04.001.003	SLATINA	SV	URBAN	30	< 40 ?	M	170	79	27.34	ABSENT	ABSENT	NO	YES	YES	0.0103	66	7.1	246	2.9	5.9	0.91	80.44	NO	ABSENT	ABSENT	NO	NO	0.5
4.04.001.004	SLATINA	SV	URBAN	44	40-60	M	172	80	27.04	ABSENT	ABSENT	NO	YES	NO	0.0112	172	55.8	216	25.8	4.7	0.99	87.52	NO	ABSENT	ABSENT	NO	NO	0.66
4.04.001.005	SLATINA	SV	URBAN	40	40-60	M	169	96	33.61	PRESENT	ABSENT	YES	NO	NO	0.0073	107	23.4	252	9.3	6.3	0.65	57.46	NO	ABSENT	ABSENT	NO	NO	0.67
4.04.001.007	SLATINA	SV	URBAN	61	>60	F	167	64	22.95	ABSENT	ABSENT	YES	NO	NO	0.009	172	3	161	1.9	4.7	0.8	70.72	YES	ABSENT	PRESENT	NO	NO	0.8
4.04.001.008	SLATINA	SV	URBAN	34	< 40 ?	F	155	85	35.38	PRESENT	PRESENT	NO	YES	NO	0.0085	150	4.2	218	1.9	5.1	0.75	66.3	NO	ABSENT	ABSENT	NO	NO	0.46
4.04.001.009	SLATINA	SV	URBAN	24	< 40 ?	M	175	75.5	24.65	ABSENT	PRESENT	NO	YES	NO	0.011	127	15	355	4.2	5.5	0.97	85.75	NO	ABSENT	ABSENT	YES	NO	0.59
4.04.001.010	SLATINA	SV	URBAN	47	40-60	F	156	70	28.76	ABSENT	ABSENT	NO	YES	NO	0.0077	131	6.4	124	5.2	4.2	0.68	60.11	NO	ABSENT	ABSENT	NO	NO	0.61
4.04.001.011	SLATINA	SV	URBAN	76	>60	F	155	60	24.97	ABSENT	ABSENT	YES	NO	NO	0.0131	70	3	42	7.1	6.6	1.16	102.54	NO	ABSENT	ABSENT	NO	NO	0.61
4.04.001.012	SLATINA	SV	URBAN	47	40-60	M	180	90	27.78	ABSENT	ABSENT	YES	NO	YES	0.0095	20	3	51	5.9	6.5	0.84	74.26	NO	ABSENT	ABSENT	NO	NO	0.54
4.04.001.013	SLATINA	SV	URBAN	48	40-60	F	163	88	33.12	PRESENT	ABSENT	NO	NO	NO	0.0062	96	3	164	1.8	4.6	0.55	48.62	NO	ABSENT	ABSENT	YES	NO	0.6
4.04.001.014	SLATINA	SV	URBAN	34	< 40 ?	F	158	48	19.23	ABSENT	ABSENT	YES	NO	NO	0.0078	173	12.1	155	7.8	3.6	0.69	61	NO	ABSENT	ABSENT	NO	NO	0.55
4.04.088.001	STREJESTI	SV	RURAL	43	40-60	M	170	79	27.34	ABSENT	ABSENT	NO	YES	YES	0.0121	153	7.9	138	5.7	6.4	1.07	94.59	NO	.	ABSENT	.	0	0.58
4.04.088.002	STREJESTI	SV	RURAL	41	40-60	F	164	90	33.46	PRESENT	ABSENT	NO	NO	YES	0.0095	139	6.2	227	2.7	2.5	0.84	74.26	NO	ABSENT	ABSENT	NO	NO	0.52
4.04.088.003	STREJESTI	SV	RURAL	44	40-60	M	171	95	32.49	PRESENT	ABSENT	YES	NO	YES	0.0096	181	9.3	120	7.8	7.6	0.85	75.14	NO	.	ABSENT	.	0
4.04.088.004	STREJESTI	SV	RURAL	48	40-60	M	175	64	20.9	ABSENT	ABSENT	NO	YES	NO	0.0098	89	3	49	6.1	5.3	0.87	76.91	NO	ABSENT	ABSENT	NO	NO	0.63
4.04.088.005	STREJESTI	SV	RURAL	42	40-60	F	170	68	23.53	ABSENT	ABSENT	NO	YES	YES	0.0092	53	3	41	7.3	3.2	0.81	71.6	NO	ABSENT	ABSENT	NO	NO	0.6
4.04.088.006	STREJESTI	SV	RURAL	23	< 40 ?	F	163	57	21.45	ABSENT	ABSENT	NO	YES	NO	0.0089	244	3	169	1.8	3.7	0.79	69.84	UNKNOWN	.	ABSENT	.	0	0.46
4.04.088.007	STREJESTI	SV	RURAL	45	40-60	F	165	80	29.38	ABSENT	ABSENT	NO	YES	NO	0.0086	119	27.6	67	41.2	5.1	0.76	67.18	NO	ABSENT	ABSENT	NO	NO	0.73
4.04.088.008	STREJESTI	SV	RURAL	58	40-60	F	160	50	19.53	ABSENT	ABSENT	YES	NO	NO	0.0078	121	3	54	5.6	4.4	0.69	61	NO	ABSENT	ABSENT	NO	NO	0.67
4.04.088.010	STREJESTI	SV	RURAL	40	40-60	F	157	54	21.91	ABSENT	ABSENT	YES	NO	NO	0.006	162	3	46	6.5	3.3	0.53	46.85	NO	ABSENT	ABSENT	YES	NO	0.5
4.04.088.011	STREJESTI	SV	RURAL	78	>60	F	150	51	22.67	ABSENT	ABSENT	YES	NO	NO	0.0073	168	19.8	146	13.6	5.2	0.65	57.46	UNKNOWN	.	ABSENT	.	0
4.04.088.012	STREJESTI	SV	RURAL	34	< 40 ?	F	163	64	24.09	ABSENT	ABSENT	NO	YES	NO	0.0078	173	3	183	1.6	4.7	0.69	61	NO	ABSENT	ABSENT	NO	NO	0.48
4.04.088.013	STREJESTI	SV	RURAL	68	>60	M	173	74	24.73	ABSENT	ABSENT	YES	NO	YES	0.0098	196	3	93	3.2	5.7	0.87	76.91	NO	ABSENT	ABSENT	NO	NO	0.82
4.04.088.014	STREJESTI	SV	RURAL	47	40-60	M	178	78	24.62	ABSENT	ABSENT	NO	YES	NO	0.0116	200	3.6	235	1.5	6.3	1.03	91.05	NO	ABSENT	ABSENT	NO	NO	0.52
4.04.088.015	STREJESTI	SV	RURAL	33	< 40 ?	F	165	59	21.67	ABSENT	ABSENT	NO	YES	NO	0.0077	98	3.5	113	3.1	4.2	0.68	60.11	NO	ABSENT	ABSENT	NO	NO	0.5
4.04.088.016	STREJESTI	SV	RURAL	31	< 40 ?	M	170	79	27.34	ABSENT	PRESENT	NO	NO	NO	0.0093	140	6.1	195	3.1	5.4	0.82	72.49	NO	ABSENT	ABSENT	NO	NO	0.54
4.04.088.017	STREJESTI	SV	RURAL	60	>60	M	170	100	34.6	PRESENT	ABSENT	YES	NO	NO	0.0097	158	3	38	7.9	4.8	0.86	76.02	NO	ABSENT	ABSENT	NO	NO	0.99
4.04.088.018	STREJESTI	SV	RURAL	34	< 40 ?	M	180	64	19.75	ABSENT	ABSENT	NO	YES	NO	0.0116	189	3.5	175	2	3.8	1.03	91.05	NO	ABSENT	ABSENT	NO	NO	0.47
4.05.001.001	RAMNIYES VALCEA	SV	URBAN	37	< 40 ?	M	176	77	24.86	ABSENT	PRESENT	YES	YES	NO	0.0125	72	9.6	224	4.3	5.5	1.11	98.12	NO	.	ABSENT	.	0	0.72
4.05.001.002	RAMNIYES VALCEA	SV	URBAN	55	40-60	M	178	88.3	27.87	ABSENT	ABSENT	YES	YES	YES	0.0099	186	3	88	3.4	4.6	0.88	77.79	NO	ABSENT	ABSENT	YES	NO	0.54
4.05.001.003	RAMNIYES VALCEA	SV	URBAN	60	>60	F	159	63.7	25.2	ABSENT	ABSENT	NO	YES	NO	0.0108	189	3	125	2.4	3.9	0.96	84.86	NO	ABSENT	ABSENT	YES	NO	0.72
4.05.001.004	RAMNIYES VALCEA	SV	URBAN	48	40-60	F	160	57.5	22.46	ABSENT	ABSENT	NO	NO	NO	0.006	126	3	43	7	3.8	0.53	46.85	.	ABSENT	ABSENT	NO	NO	0.63
4.05.001.005	RAMNIYES VALCEA	SV	URBAN	63	>60	M	185	75.1	21.94	ABSENT	ABSENT	NO	NO	YES	0.0123	121	3	132	2.3	6.2	1.09	96.36	NO	ABSENT	ABSENT	NO	NO	0.57
4.05.001.006	RAMNIYES VALCEA	SV	URBAN	66	>60	M	172	87	29.41	ABSENT	ABSENT	NO	NO	NO	0.0118	76	3	97	3.1	5.5	1.04	91.94	NO	ABSENT	ABSENT	NO	NO	0.92
4.05.001.008	RAMNIYES VALCEA	SV	URBAN	67	>60	F	158	76.8	30.76	PRESENT	ABSENT	YES	NO	NO	0.0088	108	3	81	3.7	4.6	0.78	68.95	.	ABSENT	ABSENT	NO	NO	0.7
4.05.001.009	RAMNIYES VALCEA	SV	URBAN	40	40-60	F	171	61.1	20.9	ABSENT	ABSENT	NO	NO	NO	0.0071	91	3	57	5.3	3.1	0.63	55.69	NO	ABSENT	ABSENT	UNKNOWN	NO	0.61
4.05.001.010	RAMNIYES VALCEA	SV	URBAN	40	40-60	F	171	60.7	20.76	ABSENT	ABSENT	NO	YES	NO	0.0095	152	3	94	3.2	2.6	0.84	74.26	NO	ABSENT	ABSENT	NO	NO	0.63
4.05.001.011	RAMNIYES VALCEA	SV	URBAN	24	< 40 ?	M	190	66.4	18.39	ABSENT	ABSENT	NO	YES	NO	0.0093	176	6.7	265	2.5	5.6	0.82	72.49	NO	ABSENT	ABSENT	NO	NO	0.56
4.05.001.012	RAMNIYES VALCEA	SV	URBAN	49	40-60	M	178	102	32.19	PRESENT	PRESENT	YES	NO	YES	0.0095	224	3	196	1.5	4.5	0.84	74.26	NO	.	ABSENT	.	0	0.65
4.05.001.013	RAMNIYES VALCEA	SV	URBAN	50	40-60	F	164	60.5	22.49	ABSENT	PRESENT	NO	NO	NO	0.0089	81	7.4	223	3.3	4.3	0.79	69.84	NO	ABSENT	ABSENT	YES	NO
4.05.001.014	RAMNIYES VALCEA	SV	URBAN	30	< 40 ?	F	170	58.2	20.14	ABSENT	ABSENT	NO	YES	NO	0.0082	132	3.8	183	2.1	4	0.73	64.53	NO	ABSENT	ABSENT	YES	NO	0.49
4.05.001.015	RAMNIYES VALCEA	SV	URBAN	65	>60	F	159	68	26.9	ABSENT	ABSENT	NO	NO	NO	0.0076	182	17.7	101	17.5	3.9	0.67	59.23	NO	ABSENT	ABSENT	NO	NO	0.82
4.05.001.016	RAMNIYES VALCEA	SV	URBAN	66	>60	M	176	85.6	27.63	ABSENT	ABSENT	YES	NO	NO	0.017	82	2402	47	5110.6	7.5	1.5	132.6	.	ABSENT	PRESENT	YES	NO	0.9
4.05.001.017	RAMNIYES VALCEA	SV	URBAN	44	40-60	M	180.5	102	31.31	PRESENT	ABSENT	YES	NO	NO	0.0095	122	4.6	119	3.9	4.2	0.84	74.26	NO	ABSENT	ABSENT	NO	NO	0.58
4.05.001.018	RAMNIYES VALCEA	SV	URBAN	65	>60	F	161	63	24.3	ABSENT	ABSENT	NO	YES	YES	0.0092	97	3	144	2.1	5.1	0.81	71.6	.	.	ABSENT	.	.	0.81
4.05.001.019	RAMNIYES VALCEA	SV	URBAN	68	>60	M	179	83.8	26.15	ABSENT	ABSENT	NO	YES	YES	0.0118	103	0.2	54	0.4	3.2	1.04	91.94	NO	ABSENT	ABSENT	NO	NO	0.78
4.05.001.020	RAMNIYES VALCEA	SV	URBAN	64	>60	F	150	64.3	28.58	ABSENT	ABSENT	YES	NO	NO	0.0078	135	3	75	4	6	0.69	61	.	ABSENT	ABSENT	NO	NO	0.78
4.05.001.022	RAMNIYES VALCEA	SV	URBAN	30	< 40 ?	M	183	82.5	24.63	ABSENT	PRESENT	NO	YES	NO	0.011	55	3.2	72	4.4	5.5	0.97	85.75	NO	ABSENT	ABSENT	NO	NO	0.66
4.05.001.023	RAMNIYES VALCEA	SV	URBAN	75	>60	F	155	72.6	30.22	PRESENT	ABSENT	NO	YES	YES	0.0078	108	3	138	2.2	3.3	0.69	61	NO	ABSENT	ABSENT	NO	NO	0.69
4.05.001.024	RAMNIYES VALCEA	SV	URBAN	76	>60	M	171	100	34.2	PRESENT	ABSENT	YES	NO	YES	0.017	133	17.7	64	27.7	7.4	1.5	132.6	YES	.	PRESENT	.	.	0.66
4.05.001.025	RAMNIYES VALCEA	SV	URBAN	61	>60	M	169	83	29.06	ABSENT	ABSENT	YES	NO	NO	0.0087	0	22.2	112	19.8	5.1	0.77	68.07	NO	.	ABSENT	.	.	0.83
4.05.001.026	RAMNIYES VALCEA	SV	URBAN	37	< 40 ?	M	163	82.1	30.9	PRESENT	ABSENT	NO	YES	YES	0.0094	144	3.4	154	2.2	5.6	0.83	73.37	.	ABSENT	ABSENT	NO	NO	0.51
4.05.001.027	RAMNIYES VALCEA	SV	URBAN	67	>60	F	150	60.6	26.93	ABSENT	ABSENT	YES	NO	NO	0.0061	66	3	83	3.6	4.2	0.54	47.74	.	ABSENT	ABSENT	NO	NO	0.62
4.05.001.028	RAMNIYES VALCEA	SV	URBAN	44	40-60	M	162	66.4	25.3	ABSENT	ABSENT	NO	NO	NO	0.0129	145	11.2	223	5	5.7	1.14	100.78	NO	ABSENT	ABSENT	YES	NO	0.8
4.05.001.029	RAMNIYES VALCEA	SV	URBAN	43	40-60	F	162	90.6	34.52	PRESENT	ABSENT	NO	YES	NO	0.0087	88	3	132	2.3	5.3	0.77	68.07	NO	ABSENT	ABSENT	YES	NO	0.54
4.05.038.001	DCEI	SV	RURAL	58	40-60	M	176	105	33.9	PRESENT	ABSENT	YES	NO	NO	0.0067	0	136.3	125	109	3.4	0.59	52.16	.	ABSENT	ABSENT	NO	NO
4.05.038.002	DCEI	SV	RURAL	45	40-60	F	153	93.6	39.98	PRESENT	PRESENT	YES	YES	NO	0.0098	207	3	102	2.9	5.4	0.87	76.91	NO	ABSENT	ABSENT	NO	NO
4.05.038.003	DCEI	SV	RURAL	49	40-60	M	180	94.4	29.14	ABSENT	ABSENT	YES	NO	NO	0.0099	196	21.4	146	14.7	7.2	0.88	77.79	.	ABSENT	ABSENT	NO	NO
4.05.038.004	DCEI	SV	RURAL	64	>60	M	168	87	30.82	PRESENT	ABSENT	YES	NO	YES	0.0063	104	3	65	4.6	5.9	0.56	49.5	.	ABSENT	ABSENT	YES	NO
4.05.038.005	DCEI	SV	RURAL	69	>60	M	171	92.2	31.53	PRESENT	ABSENT	YES	NO	YES	0.0101	232	3	67	4.5	6.4	0.89	78.68	NO	ABSENT	ABSENT	YES	NO
4.05.038.006	DCEI	SV	RURAL	71	>60	F	157	64	25.96	ABSENT	ABSENT	YES	NO	NO	0.0066	163	12.9	172	7.5	3.9	0.58	51.27	YES	ABSENT	PRESENT	NO	NO
4.05.038.007	DCEI	SV	RURAL	56	40-60	M	172	98	33.13	PRESENT	ABSENT	YES	NO	NO	0.0103	156	3	66	4.5	5.9	0.91	80.44	NO	ABSENT	ABSENT	NO	NO
4.05.038.008	DCEI	SV	RURAL	21	< 40 ?	M	175	84.4	27.56	ABSENT	PRESENT	YES	YES	YES	0.0094	155	8.4	257	3.3	4.7	0.83	73.37	NO	ABSENT	ABSENT	NO	NO
4.05.038.010	DCEI	SV	RURAL	30	< 40 ?	F	153	54.1	23.11	ABSENT	ABSENT	NO	YES	NO	0.0062	155	10.2	177	5.8	4	0.55	48.62	NO	ABSENT	ABSENT	NO	NO
4.05.038.011	DCEI	SV	RURAL	57	40-60	M	173	102.6	34.28	PRESENT	ABSENT	NO	NO	NO	0.0102	163	9.9	130	7.6	6.8	0.9	79.56	.	ABSENT	ABSENT	NO	NO
4.05.038.012	DCEI	SV	RURAL	80	>60	F	148	48	21.91	ABSENT	ABSENT	YES	NO	YES	0.0062	190	3	52	5.8	4.3	0.55	48.62	NO	ABSENT	ABSENT	YES	NO
4.05.038.013	DCEI	SV	RURAL	19	< 40 ?	F	159	43	17.01	ABSENT	ABSENT	NO	YES	NO	0.0076	96	21	280	7.5	4.8	0.67	59.23	NO	ABSENT	ABSENT	NO	NO
4.05.038.014	DCEI	SV	RURAL	20	< 40 ?	F	158	66.8	26.76	ABSENT	ABSENT	NO	YES	NO	0.0066	111	7.4	206	3.6	3.7	0.58	51.27	NO	ABSENT	ABSENT	NO	NO
4.05.038.015	DCEI	SV	RURAL	42	40-60	M	165	102.2	37.54	PRESENT	ABSENT	NO	NO	NO	0.0097	171	3	103	2.9	5.6	0.86	76.02	NO	ABSENT	ABSENT	YES	NO
4.05.038.016	DCEI	SV	RURAL	47	40-60	M	162	75.6	28.81	ABSENT	ABSENT	NO	NO	YES	0.0081	165	12.7	118	10.8	4.3	0.72	63.65	.	ABSENT	ABSENT	NO	NO
4.05.038.017	DCEI	SV	RURAL	44	40-60	F	156	77.5	31.85	PRESENT	ABSENT	YES	NO	NO	0.0092	188	3	128	2.3	4.6	0.81	71.6	NO	ABSENT	ABSENT	NO	NO
4.05.038.018	DCEI	SV	RURAL	42	40-60	F	164	64	23.8	ABSENT	ABSENT	YES	NO	YES	0.0068	66	29.9	236	12.7	3	0.6	53.04	NO	ABSENT	ABSENT	YES	NO
4.05.038.019	DCEI	SV	RURAL	61	>60	F	162	85.8	32.69	PRESENT	PRESENT	YES	NO	NO	0.0092	161	387.2	105	368.8	6.4	0.81	71.6	NO	.	PRESENT	.	0
4.05.038.020	DCEI	SV	RURAL	18	< 40 ?	F	167.5	69	24.59	ABSENT	ABSENT	NO	YES	YES	0.0067	127	3	111	2.7	3.6	0.59	52.16	NO	ABSENT	ABSENT	UNKNOWN	NO
4.05.038.021	DCEI	SV	RURAL	39	< 40 ?	M	180	69.6	21.48	ABSENT	ABSENT	NO	YES	NO	0.0078	0	4.2	156	2.7	3.9	0.69	61	NO	ABSENT	ABSENT	NO	NO
4.05.038.022	DCEI	SV	RURAL	20	< 40 ?	M	183	106.2	31.71	PRESENT	ABSENT	NO	YES	NO	0.0088	129	3	165	1.8	4.7	0.78	68.95	NO	ABSENT	ABSENT	NO	NO
4.05.038.023	DCEI	SV	RURAL	42	40-60	M	171	91	31.12	PRESENT	ABSENT	YES	NO	YES	0.0106	226	3	160	1.9	5.9	0.94	83.1	NO	ABSENT	ABSENT	YES	NO
4.05.038.024	DCEI	SV	RURAL	19	< 40 ?	M	168.5	75.8	26.7	ABSENT	PRESENT	NO	NO	NO	0.0101	98	4.7	295	1.6	5.3	0.89	78.68	NO	ABSENT	ABSENT	NO	NO
4.05.038.026	DCEI	SV	RURAL	63	>60	M	168	95.5	33.84	PRESENT	ABSENT	NO	NO	NO	0.009	231	3	128	2.3	5.1	0.8	70.72	NO	ABSENT	ABSENT	YES	NO
5.01.001.000	ARAD	V	URBAN	45	40-60	M	173	101	33.75	PRESENT	ABSENT	NO	YES	YES	0.0107	133	7.1	269	2.6	7.5	0.95	83.98	NO	ABSENT	ABSENT	YES	NO
5.01.001.001	ARAD	V	URBAN	49	40-60	M	183	133	39.71	PRESENT	ABSENT	YES	NO	YES	0.0113	140	66.1	97	68.1	6	1	88.4	NO	ABSENT	ABSENT	NO	NO
5.01.001.002	ARAD	V	URBAN	69	>60	M	174	92	30.39	PRESENT	ABSENT	YES	NO	NO	0.0107	121	1	107	0.9	4.1	0.95	83.98	NO	ABSENT	ABSENT	NO	NO
5.01.001.003	ARAD	V	URBAN	65	>60	M	176	120	38.74	PRESENT	PRESENT	YES	NO	NO	0.011	264	4.3	122	3.5	6.7	0.97	85.75	NO	ABSENT	ABSENT	NO	NO
5.01.001.004	ARAD	V	URBAN	77	>60	M	170	79.4	27.47	ABSENT	ABSENT	YES	NO	NO	0.0115	102	3.8	228	1.7	4.7	1.02	90.17	NO	ABSENT	ABSENT	NO	NO
5.01.001.005	ARAD	V	URBAN	64	>60	M	184	106	31.31	PRESENT	ABSENT	YES	NO	NO	0.0116	163	5.3	142	3.7	6.1	1.03	91.05	NO	ABSENT	ABSENT	NO	NO
5.01.001.006	ARAD	V	URBAN	46	40-60	M	170	75.5	26.12	ABSENT	ABSENT	YES	YES	NO	0.0082	210	2.7	171	1.6	4.4	0.73	64.53	NO	ABSENT	ABSENT	NO	NO
5.01.001.007	ARAD	V	URBAN	57	40-60	F	155	70	29.14	ABSENT	ABSENT	YES	YES	NO	0.0082	173	6.8	103	6.6	3.8	0.73	64.53	NO	ABSENT	ABSENT	YES	NO
5.01.001.008	ARAD	V	URBAN	63	>60	F	163	62	23.34	ABSENT	PRESENT	YES	YES	NO	0.007	63	1.7	64	2.7	3	0.62	54.81	NO	ABSENT	ABSENT	NO	NO
5.01.001.009	ARAD	V	URBAN	60	>60	M	184	91.8	27.11	ABSENT	ABSENT	NO	NO	YES	0.009	219	7.9	109	7.2	3.2	0.8	70.72	NO	ABSENT	ABSENT	NO	NO
5.01.001.010	ARAD	V	URBAN	76	>60	F	160	76	29.69	ABSENT	ABSENT	YES	NO	YES	0.0133	139	1.5	55	2.7	5.1	1.18	104.31	NO	ABSENT	ABSENT	NO	NO
5.01.001.011	ARAD	V	URBAN	51	40-60	F	166	83.2	30.19	PRESENT	PRESENT	YES	YES	NO	0.008	78	1.5	110	1.4	4.6	0.71	62.76	NO	ABSENT	ABSENT	NO	NO
5.01.001.012	ARAD	V	URBAN	41	40-60	F	167	105.9	37.97	PRESENT	ABSENT	NO	NO	NO	0.0066	141	10.7	217	4.9	3.7	0.58	51.27	NO	ABSENT	ABSENT	NO	NO
5.01.001.013	ARAD	V	URBAN	48	40-60	F	156	46	18.9	ABSENT	ABSENT	NO	YES	YES	0.0081	113	14.2	192	7.4	3.1	0.72	63.65	NO	ABSENT	ABSENT	NO	NO
5.01.001.014	ARAD	V	URBAN	53	40-60	F	160	81	31.64	PRESENT	PRESENT	NO	NO	NO	0.0087	26	0.6	16	3.8	5.3	0.77	68.07	NO	ABSENT	ABSENT	NO	NO
5.01.001.015	ARAD	V	URBAN	45	40-60	F	158	91.3	36.57	PRESENT	ABSENT	YES	NO	NO	0.0052	89	2.2	80	2.8	5	0.46	40.66	NO	ABSENT	ABSENT	NO	NO
5.01.001.016	ARAD	V	URBAN	42	40-60	M	166	61	22.14	ABSENT	ABSENT	NO	YES	NO	0.0092	175	10.9	235	4.6	4.3	0.81	71.6	NO	ABSENT	ABSENT	NO	NO
5.01.001.017	ARAD	V	URBAN	28	< 40 ?	F	165	56	20.57	ABSENT	PRESENT	NO	YES	NO	0.0064	100	2.7	71	3.8	3.5	0.57	50.39	NO	ABSENT	ABSENT	YES	NO
5.01.001.018	ARAD	V	URBAN	30	< 40 ?	F	159	55.9	22.11	ABSENT	ABSENT	YES	YES	NO	0.0059	164	16.7	204	8.2	3.5	0.52	45.97	NO	ABSENT	ABSENT	NO	NO
5.01.001.019	ARAD	V	URBAN	28	< 40 ?	F	158	55	22.03	ABSENT	ABSENT	NO	YES	NO	0.0079	169	1.9	68	2.8	3.2	0.7	61.88	NO	ABSENT	ABSENT	UNKNOWN	NO
5.01.001.020	ARAD	V	URBAN	36	< 40 ?	M	168	69	24.45	ABSENT	ABSENT	YES	YES	NO	0.0094	157	1.4	211	0.7	6.1	0.83	73.37	NO	ABSENT	ABSENT	NO	NO
5.01.001.021	ARAD	V	URBAN	65	>60	F	157	85	34.48	PRESENT	ABSENT	YES	NO	YES	0.0098	149	57.7	215	26.8	5.2	0.87	76.91	YES	ABSENT	PRESENT	NO	NO
5.01.001.022	ARAD	V	URBAN	21	< 40 ?	F	167	59	21.16	ABSENT	ABSENT	YES	YES	NO	0.0072	154	3.7	138	2.7	3.6	0.64	56.58	NO	ABSENT	ABSENT	YES	NO
5.01.001.023	ARAD	V	URBAN	26	< 40 ?	M	185	112	32.72	PRESENT	ABSENT	NO	NO	NO	0.0099	149	1.5	166	0.9	5.3	0.88	77.79	NO	ABSENT	ABSENT	NO	NO
5.01.001.026	ARAD	V	URBAN	29	< 40 ?	M	173	73	24.39	ABSENT	PRESENT	NO	YES	YES	0.013	56	8.9	167	5.3	6.1	1.15	101.66	NO	ABSENT	ABSENT	NO	NO
5.01.001.027	ARAD	V	URBAN	47	40-60	M	176	90	29.05	ABSENT	PRESENT	YES	YES	NO	0.0078	138	4.3	124	3.5	6.9	0.69	61	NO	ABSENT	ABSENT	NO	NO	0.96
5.01.074.001	VLADIMIRESYES	V	RURAL	63	>60	F	160	69	26.95	ABSENT	ABSENT	YES	NO	NO	0.0088	60	0.8	31	2.6	4.5	0.78	68.95	NO	ABSENT	ABSENT	NO	NO
5.01.074.002	VLADIMIRESYES	V	RURAL	65	>60	F	161	75	28.93	ABSENT	ABSENT	YES	NO	NO	0.0084	166	9.6	92	10.4	2.8	0.74	65.42	NO	ABSENT	ABSENT	YES	NO
5.01.074.003	VLADIMIRESYES	V	RURAL	58	40-60	M	170	86.6	29.97	ABSENT	ABSENT	YES	NO	NO	0.0119	114	2	86	2.3	6.9	1.05	92.82	NO	ABSENT	ABSENT	YES	NO
5.01.074.004	VLADIMIRESYES	V	RURAL	33	< 40 ?	M	164	76	28.26	ABSENT	ABSENT	YES	NO	NO	0.0118	58	2.7	101	2.7	6.6	1.04	91.94	NO	ABSENT	ABSENT	NO	NO
5.01.074.005	VLADIMIRESYES	V	RURAL	66	>60	M	175	103	33.63	PRESENT	ABSENT	YES	NO	YES	0.0134	50	1.8	46	3.9	7	1.19	105.2	NO	ABSENT	ABSENT	NO	NO
5.01.074.006	VLADIMIRESYES	V	RURAL	38	< 40 ?	M	177	118	37.66	PRESENT	PRESENT	YES	NO	NO	0.0129	132	23.6	153	15.4	7.1	1.14	100.78	NO	ABSENT	ABSENT	YES	NO
5.01.074.007	VLADIMIRESYES	V	RURAL	36	< 40 ?	M	189	87	24.36	ABSENT	PRESENT	NO	YES	NO	0.0098	67	1.7	109	1.6	4.8	0.87	76.91	NO	ABSENT	ABSENT	NO	NO
5.01.074.008	VLADIMIRESYES	V	RURAL	24	< 40 ?	F	155	68	28.3	ABSENT	PRESENT	NO	YES	YES	0.0075	218	4.4	132	3.3	3.8	0.66	58.34	NO	ABSENT	ABSENT	NO	NO
5.01.074.009	VLADIMIRESYES	V	RURAL	57	40-60	F	149	66	29.73	ABSENT	ABSENT	NO	NO	NO	0.008	126	1.2	41	2.9	4.1	0.71	62.76	NO	ABSENT	ABSENT	NO	NO
5.01.074.010	VLADIMIRESYES	V	RURAL	44	40-60	M	181	119	36.32	PRESENT	ABSENT	YES	NO	NO	0.0088	116	24.9	241	10.3	5.5	0.78	68.95	NO	ABSENT	ABSENT	NO	NO
5.01.074.011	VLADIMIRESYES	V	RURAL	45	40-60	F	165	66	24.24	ABSENT	ABSENT	YES	YES	NO	0.009	91	43.8	241	18.2	4.3	0.8	70.72	NO	ABSENT	ABSENT	NO	NO
5.01.074.012	VLADIMIRESYES	V	RURAL	29	< 40 ?	F	170	57	19.72	ABSENT	PRESENT	NO	YES	NO	0.0088	57	20.7	376	5.5	2.7	0.78	68.95	NO	ABSENT	ABSENT	YES	NO
5.01.074.013	VLADIMIRESYES	V	RURAL	71	>60	M	175	102	33.31	PRESENT	ABSENT	NO	NO	NO	0.0066	196	3	91	3.3	4.9	0.58	51.27	NO	ABSENT	ABSENT	NO	NO
5.01.074.014	VLADIMIRESYES	V	RURAL	25	< 40 ?	F	169	83	29.06	ABSENT	ABSENT	NO	YES	NO	0.0079	106	3.2	211	1.5	4.2	0.7	61.88	NO	ABSENT	ABSENT	YES	NO
5.01.074.016	VLADIMIRESYES	V	RURAL	63	>60	M	174	109	36	PRESENT	ABSENT	YES	NO	NO	0.0079	208	6.1	121	5	5.1	0.7	61.88	NO	ABSENT	ABSENT	NO	NO
5.01.074.017	VLADIMIRESYES	V	RURAL	47	40-60	F	163	78.4	29.51	ABSENT	ABSENT	YES	NO	NO	0.0067	95	3.6	70	5.1	4.2	0.59	52.16	NO	ABSENT	ABSENT	YES	NO
5.01.074.018	VLADIMIRESYES	V	RURAL	45	40-60	F	164	68	25.28	ABSENT	ABSENT	NO	YES	NO	0.0096	137	1.9	113	1.7	2.5	0.85	75.14	NO	ABSENT	ABSENT	NO	NO
5.02.001.001	RESITA	V	URBAN	34	< 40 ?	F	155	55	22.89	ABSENT	PRESENT	NO	YES	NO	0.0081	43	29.1	100	29.1	3.6	0.72	63.65	NO	ABSENT	ABSENT	NO	NO	0.42
5.02.001.002	RESITA	V	URBAN	61	>60	F	164	65.6	24.39	ABSENT	ABSENT	NO	YES	NO	0.0077	107	2.6	61	4.3	4.2	0.68	60.11	NO	ABSENT	ABSENT	NO	NO	0.71
5.02.001.003	RESITA	V	URBAN	45	40-60	M	173	71.9	24.02	ABSENT	PRESENT	NO	NO	NO	0.0094	193	1.6	99	1.6	3.3	0.83	73.37	NO	ABSENT	ABSENT	YES	NO	0.54
5.02.001.004	RESITA	V	URBAN	59	40-60	M	175	114.2	37.29	PRESENT	ABSENT	YES	NO	NO	0.0086	71	1.4	79	1.8	7.6	0.76	67.18	NO	ABSENT	ABSENT	YES	NO	0.65
5.02.001.005	RESITA	V	URBAN	64	>60	M	177	90.5	28.89	ABSENT	ABSENT	YES	YES	NO	0.009	90	4.6	95	4.8	6.4	0.8	70.72	NO	ABSENT	ABSENT	YES	NO	0.61
5.02.001.006	RESITA	V	URBAN	67	>60	F	157	87.7	35.58	PRESENT	ABSENT	NO	YES	YES	0.0145	157	1.6	128	1.3	8	1.28	113.15	.	ABSENT	ABSENT	NO	NO	0.72
5.02.001.007	RESITA	V	URBAN	79	>60	M	162	72.6	27.66	ABSENT	ABSENT	YES	NO	NO	0.0122	123	3.8	60	6.3	6.6	1.08	95.47	.	ABSENT	ABSENT	YES	NO	0.9
5.02.001.008	RESITA	V	URBAN	40	40-60	F	155	61.1	25.43	ABSENT	ABSENT	NO	YES	NO	0.007	165	5.9	209	2.8	3.4	0.62	54.81	NO	ABSENT	ABSENT	NO	NO	0.53
5.02.001.009	RESITA	V	URBAN	36	< 40 ?	M	185	111	32.43	PRESENT	ABSENT	YES	NO	NO	0.0098	146	5.4	235	2.3	7.2	0.87	76.91	NO	ABSENT	ABSENT	NO	NO	0.67
5.02.001.010	RESITA	V	URBAN	52	40-60	F	164	96	35.69	PRESENT	ABSENT	YES	NO	NO	0.009	143	49.7	64	77.7	9.2	0.8	70.72	NO	ABSENT	ABSENT	NO	NO	0.59
5.02.001.011	RESITA	V	URBAN	35	< 40 ?	F	160	62.7	24.49	ABSENT	ABSENT	NO	YES	YES	0.008	83	3.1	24	12.9	2.1	0.71	62.76	NO	ABSENT	ABSENT	NO	NO	0.48
5.02.001.012	RESITA	V	URBAN	75	>60	M	170	64.3	22.25	ABSENT	ABSENT	YES	NO	YES	0.0119	209	5.6	111	5	4.5	1.05	92.82	UNKNOWN	ABSENT	ABSENT	YES	NO	0.83
5.02.001.013	RESITA	V	URBAN	68	>60	F	158	70	28.04	ABSENT	ABSENT	YES	NO	NO	0.0081	162	0.9	72	1.3	3.5	0.72	63.65	NO	ABSENT	ABSENT	YES	NO	0.64
5.02.001.014	RESITA	V	URBAN	52	40-60	M	167	84	30.12	PRESENT	ABSENT	YES	NO	NO	0.0098	101	2	133	1.5	6.8	0.87	76.91	NO	ABSENT	ABSENT	YES	NO	0.58
5.02.001.015	RESITA	V	URBAN	67	>60	M	172	92	31.1	PRESENT	ABSENT	YES	NO	NO	0.0119	215	1.2	93	1.3	6	1.05	92.82	NO	ABSENT	ABSENT	NO	NO	0.94
5.02.001.016	RESITA	V	URBAN	24	< 40 ?	M	176	94	30.35	PRESENT	PRESENT	NO	YES	YES	0.0119	103	4.1	236	1.7	3.9	1.05	92.82	NO	ABSENT	ABSENT	YES	NO	0.52
5.02.001.017	RESITA	V	URBAN	38	< 40 ?	F	154	64.5	27.2	ABSENT	ABSENT	YES	YES	NO	0.0088	68	4.1	230	1.8	3.9	0.78	68.95	NO	ABSENT	ABSENT	NO	NO	0.55
5.02.001.018	RESITA	V	URBAN	68	>60	M	152	63	27.27	ABSENT	ABSENT	NO	YES	NO	0.0105	76	3.7	109	3.4	4.5	0.93	82.21	.	ABSENT	ABSENT	NO	NO	0.76
5.02.001.019	RESITA	V	URBAN	43	40-60	M	167	84.1	30.16	PRESENT	ABSENT	YES	NO	YES	0.0102	107	3	97	3.1	4.3	0.9	79.56	.	ABSENT	ABSENT	YES	NO	0.62
5.02.001.020	RESITA	V	URBAN	36	< 40 ?	F	167	55.5	19.9	ABSENT	ABSENT	NO	YES	YES	0.0063	48	2.3	62	3.7	1.9	0.56	49.5	NO	ABSENT	ABSENT	NO	NO	0.51
5.02.001.021	RESITA	V	URBAN	19	< 40 ?	F	156	44.5	18.29	ABSENT	ABSENT	NO	YES	NO	0.008	137	15.9	255	6.2	4.3	0.71	62.76	NO	ABSENT	ABSENT	UNKNOWN	NO	0.51
5.02.001.022	RESITA	V	URBAN	76	>60	M	170	86	29.76	ABSENT	ABSENT	YES	NO	NO	0.0096	249	0.8	94	0.9	4.7	0.85	75.14	.	ABSENT	ABSENT	UNKNOWN	NO	0.76
5.02.001.023	RESITA	V	URBAN	77	>60	F	150	59	26.22	ABSENT	ABSENT	NO	YES	NO	0.0064	142	2.1	53	4	4.4	0.57	50.39	NO	ABSENT	ABSENT	NO	NO	0.8
5.02.001.024	RESITA	V	URBAN	79	>60	F	158	78	31.24	PRESENT	ABSENT	YES	NO	NO	0.0103	201	0.8	24	3.3	5.2	0.91	80.44	NO	ABSENT	ABSENT	UNKNOWN	NO	1.07
5.02.001.025	RESITA	V	URBAN	29	< 40 ?	M	176	78	25.18	ABSENT	ABSENT	YES	NO	YES	0.0094	206	2.1	141	1.5	4.7	0.83	73.37	NO	ABSENT	ABSENT	YES	NO	0.48
5.02.014.002	BERZOVIA	V	RURAL	42	40-60	F	150	66.1	29.38	ABSENT	ABSENT	YES	NO	NO	0.0064	168	1.2	54	2.2	2.3	0.57	50.39	UNKNOWN	ABSENT	ABSENT	YES	NO	0.53
5.02.014.003	BERZOVIA	V	RURAL	65	>60	F	155	103.5	43.08	PRESENT	PRESENT	YES	YES	NO	0.0088	90	6.9	81	8.5	4.7	0.78	68.95	NO	ABSENT	ABSENT	NO	NO	0.71
5.02.014.004	BERZOVIA	V	RURAL	22	< 40 ?	F	162	59.6	22.71	ABSENT	ABSENT	NO	YES	NO	0.0098	144	1.9	178	1.1	4.9	0.87	76.91	NO	ABSENT	ABSENT	NO	NO
5.02.014.005	BERZOVIA	V	RURAL	78	>60	F	147	54.1	25.04	ABSENT	ABSENT	NO	NO	NO	0.0094	109	11.4	63	18.1	5.4	0.83	73.37	NO	ABSENT	ABSENT	NO	NO	0.75
5.02.014.006	BERZOVIA	V	RURAL	53	40-60	F	163	89	33.5	PRESENT	ABSENT	NO	NO	NO	0.0105	101	0.9	38	2.4	5.4	0.93	82.21	.	ABSENT	ABSENT	NO	NO	0.66
5.02.014.007	BERZOVIA	V	RURAL	64	>60	M	166	86	31.21	PRESENT	ABSENT	YES	NO	NO	0.0096	143	13.6	93	14.6	3.7	0.85	75.14	NO	ABSENT	ABSENT	YES	NO	0.73
5.02.014.008	BERZOVIA	V	RURAL	42	40-60	M	185	140	40.91	PRESENT	ABSENT	NO	YES	NO	0.0122	167	7.2	330	2.2	7.1	1.08	95.47	NO	ABSENT	ABSENT	YES	NO	0.52
5.02.014.009	BERZOVIA	V	RURAL	45	40-60	M	179	105.6	32.96	PRESENT	ABSENT	YES	NO	YES	0.0124	86	4.2	173	2.4	7.6	1.1	97.24	NO	ABSENT	ABSENT	NO	NO	0.68
5.02.014.010	BERZOVIA	V	RURAL	31	< 40 ?	F	159	84	33.23	PRESENT	ABSENT	NO	NO	NO	0.0094	139	11.5	178	6.5	5.9	0.83	73.37	NO	ABSENT	ABSENT	YES	NO	0.41
5.02.014.011	BERZOVIA	V	RURAL	23	< 40 ?	M	166	66	23.95	ABSENT	PRESENT	NO	NO	NO	0.009	95	2.3	146	1.6	4.8	0.8	70.72	NO	ABSENT	ABSENT	YES	NO	0.47
5.02.014.012	BERZOVIA	V	RURAL	28	< 40 ?	M	177	107	34.15	PRESENT	ABSENT	YES	YES	NO	0.0092	121	18.6	416	4.5	6.8	0.81	71.6	NO	ABSENT	ABSENT	NO	NO
5.02.014.013	BERZOVIA	V	RURAL	22	< 40 ?	M	174	69.5	22.96	ABSENT	PRESENT	NO	NO	NO	0.0124	141	1.4	157	0.9	5.7	1.1	97.24	NO	ABSENT	ABSENT	NO	NO
5.02.014.014	BERZOVIA	V	RURAL	60	>60	F	153	71.7	30.63	PRESENT	ABSENT	YES	NO	NO	0.0081	62	13.7	49	28	5.5	0.72	63.65	NO	ABSENT	ABSENT	NO	NO	0.54
5.02.014.015	BERZOVIA	V	RURAL	18	< 40 ?	M	178	64	20.2	ABSENT	PRESENT	NO	YES	NO	0.0107	196	4.6	204	2.3	6.1	0.95	83.98	NO	ABSENT	ABSENT	YES	NO	0.46
5.03.001.001	DEVA	V	URBAN	54	40-60	F	164	74	27.51	ABSENT	ABSENT	YES	NO	NO	0.0061	148	14.4	72	20	3.6	0.54	47.74	NO	ABSENT	ABSENT	NO	NO	0.53
5.03.001.002	DEVA	V	URBAN	33	< 40 ?	M	175	66	21.55	ABSENT	PRESENT	NO	YES	YES	0.0096	110	2.7	115	2.3	4.9	0.85	75.14	NO	ABSENT	ABSENT	NO	NO	0.57
5.03.001.003	DEVA	V	URBAN	57	40-60	F	164	76	28.26	ABSENT	ABSENT	YES	NO	NO	0.0078	170	2.6	108	2.4	4.2	0.69	61	NO	ABSENT	ABSENT	NO	NO	0.76
5.03.001.004	DEVA	V	URBAN	66	>60	M	179	104	32.46	PRESENT	PRESENT	YES	NO	NO	0.0118	138	1	79	1.3	7.8	1.04	91.94	NO	ABSENT	ABSENT	NO	NO	0.56
5.03.001.005	DEVA	V	URBAN	46	40-60	M	178	94.8	29.92	ABSENT	PRESENT	NO	YES	NO	0.0077	125	0.9	115	0.8	5.9	0.68	60.11	NO	ABSENT	ABSENT	YES	NO	0.71
5.03.001.006	DEVA	V	URBAN	50	40-60	F	167	74.5	26.71	ABSENT	PRESENT	NO	NO	NO	0.0081	79	3	79	3.8	3.2	0.72	63.65	NO	ABSENT	ABSENT	NO	NO	0.65
5.03.001.007	DEVA	V	URBAN	61	>60	F	172	127	42.93	PRESENT	ABSENT	YES	NO	YES	0.008	112	2.1	97	2.2	6.7	0.71	62.76	NO	ABSENT	ABSENT	NO	NO	0.66
5.03.001.008	DEVA	V	URBAN	62	>60	M	184	115	33.97	PRESENT	ABSENT	NO	NO	NO	0.0139	153	3.2	139	2.3	8.9	1.23	108.73	YES	ABSENT	PRESENT	NO	NO	0.87
5.03.001.009	DEVA	V	URBAN	66	>60	F	164	78	29	ABSENT	ABSENT	YES	YES	NO	0.0082	47	2.2	70	3.1	6.1	0.73	64.53	.	ABSENT	ABSENT	NO	NO	0.69
5.03.001.010	DEVA	V	URBAN	64	>60	F	165	88	32.32	PRESENT	ABSENT	YES	YES	NO	0.0089	79	1.3	51	2.5	4.8	0.79	69.84	NO	ABSENT	ABSENT	YES	NO	0.78
5.03.001.011	DEVA	V	URBAN	79	>60	M	162	79	30.1	PRESENT	ABSENT	NO	NO	NO	0.011	129	1	79	1.3	8.5	0.97	85.75	NO	ABSENT	ABSENT	NO	NO	0.86
5.03.001.012	DEVA	V	URBAN	75	>60	F	162	58.4	22.25	ABSENT	ABSENT	YES	NO	NO	0.0072	241	3.6	60	6	3.4	0.64	56.58	NO	ABSENT	ABSENT	YES	NO	0.73
5.03.001.013	DEVA	V	URBAN	38	< 40 ?	M	178	84.3	26.61	ABSENT	ABSENT	NO	NO	NO	0.0105	93	4	120	3.3	5.2	0.93	82.21	.	ABSENT	ABSENT	NO	NO	0.48
5.03.001.014	DEVA	V	URBAN	21	< 40 ?	M	180	73	22.53	ABSENT	PRESENT	YES	YES	NO	0.0094	64	23	164	14	4.7	0.83	73.37	NO	ABSENT	ABSENT	NO	NO	0.62
5.03.001.015	DEVA	V	URBAN	29	< 40 ?	F	169	59	20.66	ABSENT	ABSENT	NO	YES	NO	0.0084	76	2.8	115	2.4	3.7	0.74	65.42	NO	ABSENT	ABSENT	NO	NO	0.59
5.03.001.016	DEVA	V	URBAN	42	40-60	F	164	78	29	ABSENT	PRESENT	NO	YES	NO	0.0086	80	2.4	150	1.6	4.3	0.76	67.18	NO	ABSENT	ABSENT	NO	NO	0.69
5.03.001.017	DEVA	V	URBAN	68	>60	M	188	115	32.54	PRESENT	ABSENT	YES	NO	NO	0.0167	97	2	68	2.9	6.7	1.48	130.83	NO	ABSENT	ABSENT	NO	NO	1.14
5.03.001.018	DEVA	V	URBAN	37	< 40 ?	M	189	105	29.39	ABSENT	PRESENT	YES	NO	NO	0.0128	83	2.7	188	1.4	6.5	1.13	99.89	NO	ABSENT	ABSENT	NO	NO	0.55
5.03.001.019	DEVA	V	URBAN	30	< 40 ?	F	168	64	22.68	ABSENT	ABSENT	YES	YES	YES	0.0071	97	27.5	126	21.8	3.5	0.63	55.69	NO	ABSENT	ABSENT	NO	NO	0.48
5.03.001.020	DEVA	V	URBAN	40	40-60	F	161	57	21.99	ABSENT	ABSENT	NO	YES	NO	0.0107	105	2	173	1.2	4.2	0.95	83.98	NO	ABSENT	ABSENT	NO	NO
5.03.001.021	DEVA	V	URBAN	54	40-60	M	171	112.9	38.61	PRESENT	ABSENT	YES	NO	NO	0.0077	127	2.5	25	10	3.8	0.68	60.11	NO	ABSENT	ABSENT	NO	NO
5.03.001.022	DEVA	V	URBAN	47	40-60	F	164	91	33.83	PRESENT	PRESENT	YES	NO	NO	0.006	176	1.8	113	1.6	4.9	0.53	46.85	NO	ABSENT	ABSENT	NO	NO	0.97
5.03.059.001	SOIMUS	V	RURAL	78	>60	F	155	66	27.47	ABSENT	ABSENT	YES	NO	NO	0.0102	112	4.6	54	8.5	6	0.9	79.56	NO	ABSENT	ABSENT	NO	NO	1.06
5.03.059.002	SOIMUS	V	RURAL	39	< 40 ?	M	190	92	25.48	ABSENT	ABSENT	YES	NO	NO	0.0106	114	7.6	130	5.8	7.8	0.94	83.1	NO	ABSENT	ABSENT	NO	NO	0.75
5.03.059.003	SOIMUS	V	RURAL	59	40-60	M	176	95.7	30.89	PRESENT	ABSENT	YES	NO	NO	0.0105	167	114	154	74	5.6	0.93	82.21	.	ABSENT	ABSENT	NO	NO	0.84
5.03.059.004	SOIMUS	V	RURAL	53	40-60	F	160	84	32.81	PRESENT	ABSENT	NO	NO	NO	0.008	86	8.6	57	15.1	5.9	0.71	62.76	NO	ABSENT	ABSENT	NO	NO	0.6
5.03.059.005	SOIMUS	V	RURAL	48	40-60	M	180	106	32.72	PRESENT	ABSENT	YES	NO	NO	0.0115	185	4.1	205	2	5.4	1.02	90.17	NO	ABSENT	ABSENT	NO	NO	0.96
5.03.059.006	SOIMUS	V	RURAL	18	< 40 ?	F	173	58	19.38	ABSENT	PRESENT	YES	YES	NO	0.0073	171	9.4	199	4.7	2.8	0.65	57.46	NO	ABSENT	ABSENT	NO	NO	0.5
5.03.059.007	SOIMUS	V	RURAL	57	40-60	F	161	61.7	23.8	ABSENT	PRESENT	YES	NO	NO	0.0069	168	12.9	94	13.7	4.7	0.61	53.92	NO	ABSENT	ABSENT	NO	NO	0.89
5.03.059.008	SOIMUS	V	RURAL	47	40-60	M	176	94	30.35	PRESENT	PRESENT	NO	NO	NO	0.0108	213	4.5	141	3.2	7.2	0.96	84.86	NO	ABSENT	ABSENT	NO	NO	0.82
5.03.059.009	SOIMUS	V	RURAL	67	>60	M	167	61.7	22.12	ABSENT	PRESENT	YES	YES	NO	0.0097	221	1.1	86	1.3	5.6	0.86	76.02	NO	ABSENT	ABSENT	YES	NO	0.75
5.03.059.010	SOIMUS	V	RURAL	27	< 40 ?	M	182	135	40.76	PRESENT	ABSENT	NO	NO	NO	0.0096	178	3	216	1.4	7.9	0.85	75.14	NO	ABSENT	ABSENT	NO	NO	0.61
5.03.059.011	SOIMUS	V	RURAL	68	>60	F	153	72	30.76	PRESENT	ABSENT	YES	NO	NO	0.0267	64	167.5	59	283.9	5.9	2.36	208.62	YES	ABSENT	PRESENT	YES	NO	0.48
5.03.059.012	SOIMUS	V	RURAL	73	>60	F	168	124	43.93	PRESENT	ABSENT	YES	NO	NO	0.0094	229	3.9	103	3.8	4.6	0.83	73.37	UNKNOWN	ABSENT	ABSENT	NO	NO	0.69
5.03.059.013	SOIMUS	V	RURAL	36	< 40 ?	M	186	84	24.28	ABSENT	PRESENT	NO	YES	NO	0.0092	114	29.9	392	7.6	6.8	0.81	71.6	NO	ABSENT	ABSENT	NO	NO	0.67
5.03.059.014	SOIMUS	V	RURAL	52	40-60	F	167	112	40.16	PRESENT	PRESENT	YES	YES	NO	0.0082	166	3.4	126	2.7	5	0.73	64.53	NO	ABSENT	ABSENT	NO	NO	0.57
5.03.059.015	SOIMUS	V	RURAL	20	< 40 ?	F	158	80	32.05	PRESENT	ABSENT	NO	YES	YES	0.0069	222	6.8	190	3.6	5.4	0.61	53.92	NO	ABSENT	ABSENT	NO	NO	0.57
5.03.059.016	SOIMUS	V	RURAL	31	< 40 ?	F	161	70	27.01	ABSENT	PRESENT	NO	YES	NO	0.0069	213	4.9	158	3.1	3.9	0.61	53.92	NO	ABSENT	ABSENT	NO	NO	0.56
5.03.059.017	SOIMUS	V	RURAL	29	< 40 ?	F	169	100	35.01	PRESENT	ABSENT	NO	YES	NO	0.0072	240	1.4	142	1	3.9	0.64	56.58	NO	ABSENT	ABSENT	YES	NO	0.57
5.03.059.018	SOIMUS	V	RURAL	39	< 40 ?	F	170	86	29.76	ABSENT	ABSENT	NO	YES	NO	0.0082	200	4.7	108	4.4	3	0.73	64.53	NO	ABSENT	ABSENT	NO	NO	0.56
5.03.059.019	SOIMUS	V	RURAL	40	40-60	F	163	71	26.72	ABSENT	ABSENT	NO	YES	YES	0.0059	132	5.5	195	2.8	3.4	0.52	45.97	NO	ABSENT	ABSENT	YES	NO	0.62
5.03.059.020	SOIMUS	V	RURAL	40	40-60	F	163	68	25.59	ABSENT	PRESENT	NO	YES	YES	0.0062	112	1.8	101	1.8	3.8	0.55	48.62	NO	ABSENT	ABSENT	YES	NO	0.55
5.03.059.021	SOIMUS	V	RURAL	19	< 40 ?	M	177	72	22.98	ABSENT	ABSENT	NO	YES	NO	0.0105	155	3.1	144	2.2	3.7	0.93	82.21	NO	ABSENT	ABSENT	YES	NO	0.61
5.03.059.022	SOIMUS	V	RURAL	34	< 40 ?	M	166	106	38.47	PRESENT	ABSENT	NO	NO	NO	0.0084	238	1.4	135	1	4.8	0.74	65.42	NO	ABSENT	ABSENT	NO	NO	0.48
5.03.059.023	SOIMUS	V	RURAL	75	>60	M	170	107	37.02	PRESENT	ABSENT	NO	NO	NO	0.0094	175	3.1	119	2.6	5.6	0.83	73.37	NO	ABSENT	ABSENT	NO	NO	0.87
5.03.059.024	SOIMUS	V	RURAL	56	40-60	F	158	72	28.84	ABSENT	PRESENT	NO	YES	NO	0.0053	139	1.6	50	3.2	3.8	0.47	41.55	NO	ABSENT	ABSENT	NO	NO	0.61
5.03.059.025	SOIMUS	V	RURAL	55	40-60	M	177	75	23.94	ABSENT	PRESENT	NO	NO	NO	0.0099	258	1.8	156	1.2	5.6	0.88	77.79	NO	ABSENT	ABSENT	YES	NO
5.03.059.026	SOIMUS	V	RURAL	73	>60	M	173	100	33.41	PRESENT	ABSENT	YES	NO	NO	0.0173	119	134.4	74	181.6	6.3	1.53	135.25	NO	ABSENT	ABSENT	NO	NO
5.04.001.001	TIMISOARA	V	URBAN	47	40-60	M	169	73.9	25.87	ABSENT	PRESENT	YES	NO	NO	0.0119	231	2.5	236	1.1	4.8	1.05	92.82	NO	ABSENT	ABSENT	NO	NO	0.57
5.04.001.002	TIMISOARA	V	URBAN	44	40-60	F	163	95.8	36.06	PRESENT	ABSENT	NO	NO	NO	0.0108	158	25.6	137	18.7	7.2	0.96	84.86	NO	ABSENT	ABSENT	YES	NO	0.5
5.04.001.003	TIMISOARA	V	URBAN	61	>60	M	160	81.7	31.91	PRESENT	PRESENT	YES	NO	NO	0.0118	178	9.2	133	6.9	4.9	1.04	91.94	NO	ABSENT	ABSENT	YES	NO	0.87
5.04.001.004	TIMISOARA	V	URBAN	60	>60	F	149	57.5	25.9	ABSENT	ABSENT	NO	YES	YES	0.0085	29	2	105	1.9	3.6	0.75	66.3	NO	ABSENT	ABSENT	YES	NO	0.58
5.04.001.005	TIMISOARA	V	URBAN	57	40-60	F	154	89.5	37.74	PRESENT	ABSENT	YES	NO	YES	0.0069	113	5.2	92	5.7	4	0.61	53.92	YES	ABSENT	PRESENT	NO	NO	0.77
5.04.001.006	TIMISOARA	V	URBAN	58	40-60	F	147	65.7	30.4	PRESENT	ABSENT	YES	NO	NO	0.0061	64	3.5	35	10	5.5	0.54	47.74	NO	.	ABSENT	.	0	0.63
5.04.001.007	TIMISOARA	V	URBAN	47	40-60	M	179.5	88	27.31	ABSENT	ABSENT	YES	YES	YES	0.0113	178	2.2	216	1	6.2	1	88.4	NO	ABSENT	ABSENT	YES	NO	0.58
5.04.001.008	TIMISOARA	V	URBAN	56	40-60	F	161	90.6	34.95	PRESENT	ABSENT	NO	NO	NO	0.005	75	0.8	28	2.9	5	0.44	38.9	NO	ABSENT	ABSENT	NO	NO	0.62
5.04.001.009	TIMISOARA	V	URBAN	30	< 40 ?	F	162	54.2	20.65	ABSENT	ABSENT	NO	YES	NO	0.006	239	3.2	106	3	3.2	0.53	46.85	YES	ABSENT	PRESENT	YES	NO	0.52
5.04.001.010	TIMISOARA	V	URBAN	34	< 40 ?	M	176	91.3	29.47	ABSENT	ABSENT	YES	NO	YES	0.0139	72	44.7	187	23.9	6.7	1.23	108.73	NO	.	ABSENT	.	0
5.04.001.011	TIMISOARA	V	URBAN	46	40-60	M	177	79.3	25.31	ABSENT	ABSENT	YES	NO	NO	0.0098	125	1.3	96	1.4	5.2	0.87	76.91	.	ABSENT	ABSENT	NO	NO	0.55
5.04.001.012	TIMISOARA	V	URBAN	54	40-60	F	159	65.9	26.07	ABSENT	PRESENT	NO	NO	NO	0.0072	53	1.1	50	2.2	3.6	0.64	56.58	NO	ABSENT	ABSENT	NO	NO	0.59
5.04.001.014	TIMISOARA	V	URBAN	52	40-60	F	153	63	26.91	ABSENT	PRESENT	NO	YES	YES	0.0063	92	23.2	55	42.2	4.7	0.56	49.5	NO	ABSENT	ABSENT	NO	NO	0.53
5.04.001.015	TIMISOARA	V	URBAN	61	>60	F	162	59.5	22.67	ABSENT	ABSENT	YES	NO	NO	0.0086	40	1.8	82	2.2	3	0.76	67.18	NO	ABSENT	ABSENT	NO	NO	0.92
5.04.001.017	TIMISOARA	V	URBAN	66	>60	M	168	75.2	26.64	ABSENT	ABSENT	YES	NO	NO	0.0087	216	9.8	134	7.3	4.5	0.77	68.07	NO	ABSENT	ABSENT	NO	NO	0.51
5.04.001.018	TIMISOARA	V	URBAN	30	< 40 ?	F	174	64	21.14	ABSENT	ABSENT	YES	YES	NO	0.0087	129	4.3	219	2	4.8	0.77	68.07	NO	ABSENT	ABSENT	NO	NO	0.65
5.04.001.019	TIMISOARA	V	URBAN	55	40-60	F	155	86.2	35.88	PRESENT	ABSENT	YES	YES	NO	0.0077	15	0.8	26	3.1	7.4	0.68	60.11	NO	ABSENT	ABSENT	NO	NO	0.58
5.04.001.020	TIMISOARA	V	URBAN	55	40-60	F	162	85.3	32.5	PRESENT	ABSENT	NO	NO	NO	0.0058	83	1.7	69	2.5	3.5	0.51	45.08	NO	ABSENT	ABSENT	NO	NO	0.58
5.04.001.021	TIMISOARA	V	URBAN	42	40-60	F	168	89	31.53	PRESENT	ABSENT	YES	NO	NO	0.0077	90	14.9	133	11.2	5.8	0.68	60.11	NO	ABSENT	ABSENT	NO	NO	0.86
5.04.001.022	TIMISOARA	V	URBAN	26	< 40 ?	M	171	84	28.73	ABSENT	PRESENT	NO	YES	NO	0.0103	48	4.3	202	2.1	4.3	0.91	80.44	NO	ABSENT	ABSENT	NO	NO	0.52
5.04.001.023	TIMISOARA	V	URBAN	40	40-60	M	183	81	24.19	ABSENT	ABSENT	NO	YES	NO	0.0105	180	2.1	139	1.5	5.1	0.93	82.21	NO	ABSENT	ABSENT	NO	NO	0.63
5.04.001.024	TIMISOARA	V	URBAN	66	>60	F	160	81	31.64	PRESENT	ABSENT	NO	NO	NO	0.009	241	2.7	102	2.6	3.6	0.8	70.72	YES	ABSENT	PRESENT	YES	NO	0.65
5.04.001.025	TIMISOARA	V	URBAN	59	40-60	F	160	81	31.64	PRESENT	ABSENT	YES	NO	NO	0.0088	46	0.7	61	1.1	4.8	0.78	68.95	NO	ABSENT	ABSENT	NO	NO	0.81
5.04.001.026	TIMISOARA	V	URBAN	47	40-60	M	174	96.4	31.84	PRESENT	ABSENT	NO	NO	NO	0.0105	228	0.9	74	1.2	4.9	0.93	82.21	NO	ABSENT	ABSENT	NO	NO	0.6
5.04.001.027	TIMISOARA	V	URBAN	56	40-60	M	180	90	27.78	ABSENT	ABSENT	NO	NO	NO	0.0104	215	2	169	1.2	6.2	0.92	81.33	NO	ABSENT	ABSENT	NO	NO	0.71
5.04.001.028	TIMISOARA	V	URBAN	28	< 40 ?	F	181	91.5	27.93	ABSENT	PRESENT	NO	YES	YES	0.0093	39	0.9	32	2.8	3.9	0.82	72.49	NO	ABSENT	ABSENT	UNKNOWN	NO	0.59
5.04.001.029	TIMISOARA	V	URBAN	26	< 40 ?	F	169	71.3	24.96	ABSENT	ABSENT	NO	YES	YES	0.0072	131	3.2	163	2	3.4	0.64	56.58	NO	.	ABSENT	.	0	0.56
5.04.001.030	TIMISOARA	V	URBAN	65	>60	F	155	101	42.04	PRESENT	ABSENT	YES	NO	NO	0.0084	90	0.9	71	1.3	5	0.74	65.42	NO	.	ABSENT	.	0	0.84
5.04.001.031	TIMISOARA	V	URBAN	22	< 40 ?	M	175	76.6	25.01	ABSENT	ABSENT	NO	NO	NO	0.0113	120	3.3	167	2	6.1	1	88.4	NO	ABSENT	ABSENT	NO	NO	0.49
5.04.001.032	TIMISOARA	V	URBAN	25	< 40 ?	M	187	92	26.31	ABSENT	PRESENT	NO	YES	NO	0.0102	186	7.1	264	2.7	4.3	0.9	79.56	NO	ABSENT	ABSENT	NO	NO	0.51
5.04.001.033	TIMISOARA	V	URBAN	49	40-60	M	183	97	28.96	ABSENT	ABSENT	NO	YES	NO	0.0092	138	2	160	1.3	5.7	0.81	71.6	NO	ABSENT	ABSENT	NO	NO	0.7
5.04.001.034	TIMISOARA	V	URBAN	74	>60	F	158	96.9	38.82	PRESENT	ABSENT	YES	NO	NO	0.0107	101	39.3	57	68.9	5.2	0.95	83.98	NO	ABSENT	ABSENT	NO	NO	0.7
5.04.001.035	TIMISOARA	V	URBAN	40	40-60	F	160	59	23.05	ABSENT	PRESENT	YES	YES	YES	0.0069	207	2.3	154	1.5	4.9	0.61	53.92	NO	ABSENT	ABSENT	YES	NO	0.92
5.04.001.036	TIMISOARA	V	URBAN	48	40-60	F	167	110	39.44	PRESENT	ABSENT	YES	NO	NO	0.0082	238	2.9	116	2.5	4.9	0.73	64.53	NO	ABSENT	ABSENT	YES	NO	0.56
5.04.001.037	TIMISOARA	V	URBAN	22	< 40 ?	M	177	104	33.2	PRESENT	ABSENT	NO	YES	NO	0.0124	138	8.3	129	6.4	7	1.1	97.24	.	ABSENT	ABSENT	NO	NO	0.55
5.04.001.038	TIMISOARA	V	URBAN	21	< 40 ?	F	169	66.5	23.28	ABSENT	PRESENT	NO	NO	NO	0.0081	223	7.7	179	4.3	3.4	0.72	63.65	NO	ABSENT	ABSENT	NO	NO	0.47
5.04.001.039	TIMISOARA	V	URBAN	67	>60	M	180	120	37.04	PRESENT	ABSENT	YES	NO	NO	0.0085	147	30.5	97	31.4	5.5	0.75	66.3	NO	ABSENT	ABSENT	NO	NO	0.59
5.04.001.040	TIMISOARA	V	URBAN	54	40-60	F	160	81	31.64	PRESENT	ABSENT	NO	YES	NO	0.0079	57	0.9	37	2.4	4.8	0.7	61.88	NO	ABSENT	ABSENT	YES	NO	0.61
5.04.001.041	TIMISOARA	V	URBAN	37	< 40 ?	M	176	83.9	27.09	ABSENT	ABSENT	NO	NO	NO	0.0102	194	6.2	116	5.3	5.3	0.9	79.56	NO	.	ABSENT	.	0	0.62
5.04.049.001	GIROC	V	RURAL	28	< 40 ?	M	172.5	90	30.25	PRESENT	ABSENT	NO	YES	NO	0.0116	202	2.8	207	1.4	5.7	1.03	91.05	NO	.	ABSENT	.	0	0.54
5.04.049.002	GIROC	V	RURAL	61	>60	F	160	128	50	PRESENT	ABSENT	YES	NO	NO	0.0094	181	52.8	60	88	9.1	0.83	73.37	NO	ABSENT	ABSENT	NO	NO	0.81
5.04.049.003	GIROC	V	RURAL	39	< 40 ?	F	154	79	33.31	PRESENT	ABSENT	NO	NO	NO	0.006	196	9.8	201	4.9	3.6	0.53	46.85	NO	ABSENT	ABSENT	NO	NO	0.63
5.04.049.004	GIROC	V	RURAL	57	40-60	F	165	92	33.79	PRESENT	ABSENT	YES	NO	NO	0.0076	32	1.5	35	4.3	4.9	0.67	59.23	NO	.	ABSENT	.	0	0.72
5.04.049.005	GIROC	V	RURAL	65	>60	M	170	79	27.34	ABSENT	PRESENT	NO	YES	NO	0.0116	193	1.1	90	1.2	5.9	1.03	91.05	NO	ABSENT	ABSENT	NO	NO	0.94
5.04.049.007	GIROC	V	RURAL	60	>60	F	156	65	26.71	ABSENT	ABSENT	NO	YES	NO	0.0077	129	4.9	165	3	5.4	0.68	60.11	NO	ABSENT	ABSENT	NO	NO	0.76
5.04.049.008	GIROC	V	RURAL	34	< 40 ?	M	171	57	19.49	ABSENT	PRESENT	NO	YES	NO	0.0096	131	2.2	131	1.7	4.9	0.85	75.14	NO	ABSENT	ABSENT	NO	NO	0.54
5.04.049.009	GIROC	V	RURAL	78	>60	M	168	82.6	29.27	ABSENT	ABSENT	YES	NO	NO	0.0137	63	2	61	3.3	5.8	1.21	106.96	NO	ABSENT	ABSENT	NO	NO	1
5.04.049.010	GIROC	V	RURAL	80	>60	M	171	73.4	25.1	ABSENT	ABSENT	NO	YES	YES	0.0154	125	0.7	70	1	5.7	1.36	120.22	NO	ABSENT	ABSENT	YES	NO	0.9
5.04.049.011	GIROC	V	RURAL	80	>60	M	161	89	34.34	PRESENT	ABSENT	NO	NO	NO	0.0141	178	11.5	94	12.2	5.3	1.25	110.5	NO	ABSENT	ABSENT	NO	NO	0.9
5.04.049.012	GIROC	V	RURAL	66	>60	F	152	76.4	33.07	PRESENT	ABSENT	YES	NO	NO	0.0084	43	0.7	39	1.8	4.1	0.74	65.42	NO	.	ABSENT	.	0	0.82
5.04.049.013	GIROC	V	RURAL	76	>60	F	165	92.1	33.83	PRESENT	ABSENT	YES	YES	NO	0.0085	127	1.4	50	2.8	5.8	0.75	66.3	NO	ABSENT	ABSENT	NO	NO	1.02
5.04.049.015	GIROC	V	RURAL	43	40-60	F	161	49	18.9	ABSENT	PRESENT	YES	YES	NO	0.0068	78	5	129	3.9	2.9	0.6	53.04	NO	ABSENT	ABSENT	NO	NO	0.55
5.04.049.016	GIROC	V	RURAL	55	40-60	M	177	85.9	27.42	ABSENT	ABSENT	YES	NO	YES	0.0099	116	1.1	72	1.5	4.8	0.88	77.79	NO	ABSENT	ABSENT	NO	NO	0.54
5.04.049.017	GIROC	V	RURAL	63	>60	F	162	92.8	35.36	PRESENT	ABSENT	NO	YES	NO	0.0104	67	0.5	69	0.7	4.1	0.92	81.33	NO	ABSENT	ABSENT	NO	NO	0.83
5.04.049.018	GIROC	V	RURAL	38	< 40 ?	F	178	64.2	20.26	ABSENT	ABSENT	NO	YES	NO	0.0084	92	2.2	112	2	3	0.74	65.42	NO	ABSENT	ABSENT	NO	NO	0.46
5.04.049.019	GIROC	V	RURAL	65	>60	F	156	64.1	26.34	ABSENT	ABSENT	NO	YES	YES	0.0101	112	1	67	1.5	4	0.89	78.68	NO	ABSENT	ABSENT	NO	NO	0.7
5.04.049.020	GIROC	V	RURAL	68	>60	M	173	74	24.73	ABSENT	ABSENT	NO	YES	YES	0.0096	115	1.9	90	2.1	5.8	0.85	75.14	NO	ABSENT	ABSENT	NO	NO	0.72
5.04.049.021	GIROC	V	RURAL	47	40-60	F	157	120	48.68	PRESENT	ABSENT	YES	NO	YES	0.0054	212	7.4	46	16.1	4.9	0.48	42.43	NO	ABSENT	ABSENT	NO	NO	0.75
5.04.049.023	GIROC	V	RURAL	25	< 40 ?	F	158	58.6	23.47	ABSENT	ABSENT	NO	NO	NO	0.007	181	6.9	241	2.9	3.4	0.62	54.81	NO	ABSENT	ABSENT	YES	NO	0.5
5.04.049.024	GIROC	V	RURAL	75	>60	M	172	84	28.39	ABSENT	ABSENT	NO	YES	NO	0.0098	134	7.3	57	12.8	4.4	0.87	76.91	NO	ABSENT	ABSENT	NO	NO	0.92
5.04.049.025	GIROC	V	RURAL	32	< 40 ?	F	164	96.6	35.92	PRESENT	PRESENT	YES	YES	NO	0.0075	79	1.5	140	1.1	5	0.66	58.34	NO	ABSENT	ABSENT	NO	NO	0.64
5.04.049.026	GIROC	V	RURAL	37	< 40 ?	M	165	110	40.4	PRESENT	ABSENT	NO	NO	NO	0.0102	176	4.6	146	3.2	4.1	0.9	79.56	NO	ABSENT	ABSENT	NO	NO	0.63
5.04.049.027	GIROC	V	RURAL	32	< 40 ?	F	158	59	23.63	ABSENT	ABSENT	NO	YES	NO	0.0086	29	5.9	78	7.6	5	0.76	67.18	NO	ABSENT	ABSENT	NO	NO	0.58
5.04.049.029	GIROC	V	RURAL	35	< 40 ?	M	179	98.7	30.8	PRESENT	ABSENT	NO	NO	YES	0.0122	83	16.9	280	6	6.7	1.08	95.47	NO	ABSENT	ABSENT	NO	NO	0.54
5.04.049.031	GIROC	V	RURAL	46	40-60	M	174	109.2	36.07	PRESENT	ABSENT	NO	NO	YES	0.0107	67	1	83	1.2	6.2	0.95	83.98	NO	ABSENT	ABSENT	NO	NO	0.6
5.04.049.032	GIROC	V	RURAL	68	>60	M	174	100.4	33.16	PRESENT	ABSENT	YES	NO	YES	0.0093	135	8	184	4.3	4.6	0.82	72.49	NO	.	ABSENT	.	0	0.79
5.04.049.033	GIROC	V	RURAL	45	40-60	M	175	68.6	22.4	ABSENT	PRESENT	NO	NO	YES	0.0094	32	1.6	65	2.5	4.9	0.83	73.37	NO	ABSENT	ABSENT	NO	NO	0.62
6.01.001.001	ORADEA	NV	URBAN	57	40-60	M	176	103.9	33.54	PRESENT	ABSENT	YES	NO	NO	0.0122	90	1	67	1.5	6.4	1.08	95.47	NO	ABSENT	ABSENT	UNKNOWN	NO	1
6.01.001.002	ORADEA	NV	URBAN	72	>60	M	169	85	29.76	ABSENT	ABSENT	YES	NO	YES	0.0102	109	17.2	171	10.1	6.6	0.9	79.56	.	ABSENT	ABSENT	NO	NO	0.65
6.01.001.003	ORADEA	NV	URBAN	72	>60	F	167	73.6	26.39	ABSENT	ABSENT	YES	NO	NO	0.0148	118	2.2	127	1.7	8.8	1.31	115.8	NO	ABSENT	ABSENT	NO	NO	0.78
6.01.001.004	ORADEA	NV	URBAN	60	>60	M	175	91.7	29.94	ABSENT	ABSENT	YES	NO	NO	0.0088	153	2.9	117	2.5	6.8	0.78	68.95	NO	ABSENT	ABSENT	YES	NO	0.74
6.01.001.005	ORADEA	NV	URBAN	78	>60	M	175	88.2	28.8	ABSENT	ABSENT	YES	NO	NO	0.0092	152	1.9	123	1.5	4.8	0.81	71.6	NO	ABSENT	ABSENT	YES	NO	0.85
6.01.001.006	ORADEA	NV	URBAN	63	>60	F	166	83	30.12	PRESENT	ABSENT	YES	NO	NO	0.0071	125	0.8	63	1.3	4.5	0.63	55.69	NO	ABSENT	ABSENT	NO	NO	0.73
6.01.001.007	ORADEA	NV	URBAN	67	>60	F	163	79.8	30.04	PRESENT	ABSENT	NO	YES	YES	0.0077	139	19	90	21.1	3.3	0.68	60.11	.	ABSENT	ABSENT	NO	NO	0.86
6.01.001.008	ORADEA	NV	URBAN	73	>60	M	177	60.2	19.22	ABSENT	ABSENT	YES	NO	NO	0.008	153	6.7	197	3.4	3.6	0.71	62.76	.	ABSENT	ABSENT	YES	NO	0.73
6.01.001.009	ORADEA	NV	URBAN	73	>60	M	173	88.1	29.44	ABSENT	ABSENT	YES	NO	NO	0.0162	170	5	92	5.4	7.8	1.43	126.41	NO	ABSENT	ABSENT	YES	NO	1
6.01.001.010	ORADEA	NV	URBAN	69	>60	F	157	62.7	25.44	ABSENT	ABSENT	YES	NO	NO	0.0094	119	0.9	57	1.6	4.7	0.83	73.37	NO	ABSENT	ABSENT	NO	NO	0.75
6.01.001.011	ORADEA	NV	URBAN	35	< 40 ?	F	170	83	28.72	ABSENT	PRESENT	NO	YES	NO	0.0076	138	1.1	57	1.9	2.7	0.67	59.23	NO	ABSENT	ABSENT	NO	NO	0.51
6.01.001.012	ORADEA	NV	URBAN	41	40-60	F	172	81	27.38	ABSENT	ABSENT	NO	YES	YES	0.0087	271	1.7	171	1	4	0.77	68.07	NO	ABSENT	ABSENT	YES	NO	0.58
6.01.001.013	ORADEA	NV	URBAN	31	< 40 ?	M	184	96	28.36	ABSENT	PRESENT	NO	YES	NO	0.0092	68	2.1	90	2.3	3.6	0.81	71.6	NO	ABSENT	ABSENT	NO	NO	0.62
6.01.001.014	ORADEA	NV	URBAN	68	>60	M	178	111	35.03	PRESENT	ABSENT	YES	NO	NO	0.0104	192	1.4	83	1.7	5.3	0.92	81.33	UNKNOWN	ABSENT	ABSENT	NO	NO	0.8
6.01.001.015	ORADEA	NV	URBAN	59	40-60	F	170	96	33.22	PRESENT	ABSENT	YES	NO	NO	0.0067	64	2.6	49	5.3	5.2	0.59	52.16	NO	ABSENT	ABSENT	NO	NO	0.75
6.01.001.016	ORADEA	NV	URBAN	72	>60	F	152	84.5	36.57	PRESENT	ABSENT	YES	YES	NO	0.012	86	2.5	144	1.7	4.8	1.06	93.7	UNKNOWN	ABSENT	ABSENT	YES	NO	0.75
6.01.001.017	ORADEA	NV	URBAN	37	< 40 ?	F	164	69	25.65	ABSENT	ABSENT	YES	YES	NO	0.0088	54	2.1	103	2	5.1	0.78	68.95	NO	ABSENT	ABSENT	NO	NO	0.59
6.01.001.018	ORADEA	NV	URBAN	47	40-60	F	163	71	26.72	ABSENT	ABSENT	NO	YES	YES	0.0079	157	2.5	133	1.9	3.6	0.7	61.88	NO	ABSENT	ABSENT	NO	NO	0.53
6.01.001.019	ORADEA	NV	URBAN	62	>60	F	163	84.5	31.8	PRESENT	PRESENT	YES	NO	NO	0.0079	121	8.4	129	6.5	0.7	0.7	61.88	UNKNOWN	ABSENT	ABSENT	NO	NO	0.62
6.01.001.020	ORADEA	NV	URBAN	30	< 40 ?	F	162	65	24.77	ABSENT	ABSENT	YES	NO	NO	0.0075	101	1.6	128	1.3	4.4	0.66	58.34	NO	ABSENT	ABSENT	YES	NO	0.51
6.01.001.021	ORADEA	NV	URBAN	31	< 40 ?	M	184	90	26.58	ABSENT	ABSENT	NO	YES	NO	0.013	146	1.4	194	0.7	5.9	1.15	101.66	NO	ABSENT	ABSENT	NO	NO	0.52
6.01.001.023	ORADEA	NV	URBAN	47	40-60	M	172	93	31.44	PRESENT	ABSENT	NO	NO	NO	0.0077	185	2.8	146	1.9	2.6	0.68	60.11	NO	ABSENT	ABSENT	NO	NO	0.5
6.01.001.024	ORADEA	NV	URBAN	48	40-60	F	162	57	21.72	ABSENT	ABSENT	NO	NO	NO	0.0086	92	3.1	202	1.5	3.2	0.76	67.18	NO	ABSENT	ABSENT	NO	NO	0.51
6.01.001.025	ORADEA	NV	URBAN	25	< 40 ?	M	180	71	21.91	ABSENT	PRESENT	YES	YES	NO	0.0086	159	14.1	252	5.6	4.9	0.76	67.18	NO	ABSENT	ABSENT	UNKNOWN	NO	0.48
6.01.001.027	ORADEA	NV	URBAN	33	< 40 ?	F	166	58	21.05	ABSENT	ABSENT	NO	YES	YES	0.0067	117	14.3	231	6.2	3	0.59	52.16	NO	ABSENT	ABSENT	NO	NO	0.49
6.01.001.028	ORADEA	NV	URBAN	43	40-60	M	173	73	24.39	ABSENT	PRESENT	NO	YES	NO	0.0094	116	5.5	192	2.9	5.2	0.83	73.37	NO	ABSENT	ABSENT	NO	NO	0.69
6.01.001.029	ORADEA	NV	URBAN	30	< 40 ?	F	170	59	20.42	ABSENT	PRESENT	YES	YES	NO	0.0088	165	1.3	96	1.4	3.5	0.78	68.95	NO	ABSENT	ABSENT	NO	NO	0.53
6.01.001.031	ORADEA	NV	URBAN	65	>60	M	169	92.5	32.39	PRESENT	ABSENT	YES	YES	NO	0.0114	208	2.6	130	2	5.8	1.01	89.28	NO	ABSENT	ABSENT	NO	NO	0.73
6.01.001.032	ORADEA	NV	URBAN	19	< 40 ?	F	152	53	22.94	ABSENT	ABSENT	NO	YES	YES	0.0079	55	1.9	161	1.2	4.1	0.7	61.88	NO	ABSENT	ABSENT	UNKNOWN	NO	0.5
6.01.001.033	ORADEA	NV	URBAN	40	40-60	M	182	103.9	31.37	PRESENT	PRESENT	YES	NO	NO	0.008	148	2.3	168	1.4	5.2	0.71	62.76	NO	ABSENT	ABSENT	NO	NO	0.62
6.01.001.034	ORADEA	NV	URBAN	30	< 40 ?	M	182	84	25.36	ABSENT	PRESENT	YES	NO	YES	0.0123	65	2.5	140	1.8	4.8	1.09	96.36	NO	ABSENT	ABSENT	NO	NO	0.61
6.01.001.035	ORADEA	NV	URBAN	21	< 40 ?	F	157	55	22.31	ABSENT	PRESENT	NO	YES	NO	0.0089	174	7.9	218	3.6	4.3	0.79	69.84	NO	ABSENT	ABSENT	NO	NO	0.54
6.01.001.036	ORADEA	NV	URBAN	22	< 40 ?	M	171	67	22.91	ABSENT	ABSENT	NO	YES	NO	0.0098	131	4.8	236	2	4.8	0.87	76.91	NO	ABSENT	ABSENT	NO	UNKNOWN	0.48
6.01.001.038	ORADEA	NV	URBAN	62	>60	M	169	91.1	31.9	PRESENT	PRESENT	YES	NO	NO	0.0087	101	2.3	119	1.9	4	0.77	68.07	NO	ABSENT	ABSENT	NO	NO	0.79
6.01.079.001	SINMARTIN	NV	RURAL	26	< 40 ?	F	170	68	23.53	ABSENT	PRESENT	YES	YES	NO	0.0078	162	2.7	91	3	3.8	0.69	61	NO	ABSENT	ABSENT	NO	NO	0.5
6.01.079.002	SINMARTIN	NV	RURAL	63	>60	M	168	123	43.58	PRESENT	ABSENT	YES	NO	NO	0.0119	128	1.1	95	1.2	7.5	1.05	92.82	NO	ABSENT	ABSENT	UNKNOWN	NO	0.74
6.01.079.003	SINMARTIN	NV	RURAL	30	< 40 ?	F	169	57	19.96	ABSENT	ABSENT	NO	YES	NO	0.0069	71	1.8	67	2.7	2.9	0.61	53.92	NO	ABSENT	ABSENT	NO	NO	0.46
6.01.079.004	SINMARTIN	NV	RURAL	67	>60	F	161	102	39.35	PRESENT	PRESENT	YES	NO	NO	0.0077	88	3.3	37	8.9	5.8	0.68	60.11	NO	ABSENT	ABSENT	NO	NO	0.74
6.01.079.005	SINMARTIN	NV	RURAL	36	< 40 ?	F	170	68	23.53	ABSENT	PRESENT	NO	NO	NO	0.0071	181	7	127	5.5	3	0.63	55.69	NO	ABSENT	ABSENT	UNKNOWN	NO	0.5
6.01.079.006	SINMARTIN	NV	RURAL	60	>60	F	150	74	32.89	PRESENT	ABSENT	NO	NO	YES	0.0096	94	2.1	91	2.3	5.5	0.85	75.14	NO	ABSENT	ABSENT	NO	NO	0.6
6.01.079.007	SINMARTIN	NV	RURAL	66	>60	M	171	74	25.31	ABSENT	ABSENT	YES	NO	NO	0.0102	109	2.8	105	2.7	5.5	0.9	79.56	NO	ABSENT	ABSENT	NO	NO	0.8
6.01.079.008	SINMARTIN	NV	RURAL	60	>60	F	162	95	36.2	PRESENT	ABSENT	YES	NO	NO	0.0075	173	2.4	77	3.1	4	0.66	58.34	NO	ABSENT	ABSENT	NO	NO	0.74
6.01.079.009	SINMARTIN	NV	RURAL	44	40-60	F	161	80	30.86	PRESENT	PRESENT	NO	YES	NO	0.0066	145	536.8	114	470.9	4.6	0.58	51.27	NO	ABSENT	PRESENT	NO	NO	0.6
6.01.079.010	SINMARTIN	NV	RURAL	47	40-60	M	176	97	31.31	PRESENT	PRESENT	YES	NO	NO	0.0088	69	2	82	2.4	5.3	0.78	68.95	NO	ABSENT	ABSENT	NO	NO	0.74
6.01.079.011	SINMARTIN	NV	RURAL	77	>60	F	159	83	32.83	PRESENT	ABSENT	YES	YES	NO	0.011	138	1.2	58	2.1	6.6	0.97	85.75	NO	ABSENT	ABSENT	NO	NO	0.76
6.01.079.012	SINMARTIN	NV	RURAL	60	>60	F	161	90	34.72	PRESENT	ABSENT	NO	NO	NO	0.0075	184	14.5	98	14.8	4	0.66	58.34	NO	ABSENT	ABSENT	NO	NO	0.61
6.01.079.013	SINMARTIN	NV	RURAL	79	>60	M	170	121	41.87	PRESENT	ABSENT	YES	NO	YES	0.0228	133	22	111	19.8	7.6	2.02	178.57	NO	ABSENT	ABSENT	NO	NO	1.01
6.01.079.014	SINMARTIN	NV	RURAL	75	>60	F	156	59	24.24	ABSENT	ABSENT	NO	NO	NO	0.0072	107	3.2	39	8.2	5.5	0.64	56.58	NO	ABSENT	ABSENT	NO	NO	1.26
6.01.079.015	SINMARTIN	NV	RURAL	35	< 40 ?	F	165	83.5	30.67	PRESENT	ABSENT	NO	YES	NO	0.0063	79	4.4	172	2.6	3.7	0.56	49.5	NO	ABSENT	ABSENT	NO	NO	0.49
6.01.079.016	SINMARTIN	NV	RURAL	39	< 40 ?	M	181	129.8	39.62	PRESENT	ABSENT	NO	NO	NO	0.0098	76	3.5	164	2.1	6.2	0.87	76.91	NO	.	ABSENT	.	0	0.57
6.01.079.018	SINMARTIN	NV	RURAL	56	40-60	F	153	80	34.17	PRESENT	ABSENT	NO	NO	NO	0.0098	32	1.1	40	2.8	10.2	0.87	76.91	NO	ABSENT	ABSENT	NO	NO	0.68
6.01.079.019	SINMARTIN	NV	RURAL	60	>60	M	165	85	31.22	PRESENT	ABSENT	YES	NO	NO	0.0125	77	78.2	367	21.3	4.3	1.11	98.12	NO	ABSENT	ABSENT	NO	NO	0.7
6.01.079.020	SINMARTIN	NV	RURAL	25	< 40 ?	M	178	73	23.04	ABSENT	PRESENT	YES	NO	NO	0.0096	119	26.9	298	9	5.6	0.85	75.14	NO	ABSENT	ABSENT	NO	NO	0.45
6.01.079.021	SINMARTIN	NV	RURAL	80	>60	F	154	53	22.35	ABSENT	ABSENT	YES	NO	NO	0.0063	185	99.2	19	522.1	2.5	0.56	49.5	NO	.	PRESENT	.	0	0.83
6.01.079.022	SINMARTIN	NV	RURAL	21	< 40 ?	F	162	49	18.67	ABSENT	ABSENT	NO	YES	NO	0.0075	88	7.2	147	4.9	4.1	0.66	58.34	NO	.	ABSENT	.	0	0.48
6.01.079.023	SINMARTIN	NV	RURAL	61	>60	F	158	83	33.25	PRESENT	ABSENT	YES	NO	NO	0.0058	207	7.5	91	8.2	4	0.51	45.08	NO	ABSENT	ABSENT	NO	NO	0.82
6.01.079.024	SINMARTIN	NV	RURAL	30	< 40 ?	F	162	40	15.24	ABSENT	ABSENT	YES	YES	NO	0.0061	141	8.4	132	6.4	3.9	0.54	47.74	NO	ABSENT	ABSENT	NO	NO	0.49
6.01.079.025	SINMARTIN	NV	RURAL	60	>60	F	149	59	26.58	ABSENT	ABSENT	YES	NO	NO	0.0069	175	2.7	67	4	3.4	0.61	53.92	NO	ABSENT	ABSENT	NO	NO	0.82
6.01.079.026	SINMARTIN	NV	RURAL	57	40-60	M	178	97	30.61	PRESENT	ABSENT	YES	NO	NO	0.0093	112	2.2	56	3.9	2.6	0.82	72.49	NO	ABSENT	ABSENT	NO	NO	0.85
6.01.079.027	SINMARTIN	NV	RURAL	21	< 40 ?	F	162	55	20.96	ABSENT	PRESENT	NO	YES	NO	0.0076	244	5.1	178	2.9	3.6	0.67	59.23	NO	ABSENT	ABSENT	NO	NO	0.47
6.01.079.028	SINMARTIN	NV	RURAL	26	< 40 ?	M	174	66	21.8	ABSENT	PRESENT	NO	YES	NO	0.0107	162	5.4	200	2.7	5	0.95	83.98	NO	ABSENT	ABSENT	NO	NO
6.01.079.029	SINMARTIN	NV	RURAL	31	< 40 ?	M	174	96.5	31.87	PRESENT	ABSENT	NO	YES	NO	0.0111	266	3.7	231	1.6	4.1	0.98	86.63	NO	ABSENT	ABSENT	NO	NO
6.01.079.030	SINMARTIN	NV	RURAL	65	>60	M	158	76	30.44	PRESENT	ABSENT	YES	NO	NO	0.0086	194	1.7	73	2.3	5.6	0.76	67.18	YES	ABSENT	PRESENT	YES	UNKNOWN	0.99
6.01.079.031	SINMARTIN	NV	RURAL	19	< 40 ?	M	178	114	35.98	PRESENT	PRESENT	NO	YES	NO	0.0081	159	24.8	164	15.1	5.8	0.72	63.65	NO	ABSENT	ABSENT	NO	NO	0.47
6.01.079.032	SINMARTIN	NV	RURAL	66	>60	M	178	135	42.61	PRESENT	ABSENT	YES	NO	NO	0.0096	208	12.4	73	17	5.5	0.85	75.14	NO	ABSENT	ABSENT	YES	NO
6.01.079.033	SINMARTIN	NV	RURAL	51	40-60	F	157	84	34.08	PRESENT	ABSENT	NO	YES	NO	0.0082	119	1.6	105	1.5	7	0.73	64.53	NO	ABSENT	ABSENT	YES	NO	0.75
6.01.079.034	SINMARTIN	NV	RURAL	48	40-60	F	162	101	38.48	PRESENT	ABSENT	NO	NO	NO	0.0079	32	14.7	136	10.8	8.1	0.7	61.88	NO	ABSENT	ABSENT	YES	NO	0.8
6.01.079.035	SINMARTIN	NV	RURAL	49	40-60	F	169	68	23.81	ABSENT	ABSENT	NO	NO	YES	0.0075	85	4.3	79	5.4	3.1	0.66	58.34	NO	ABSENT	ABSENT	NO	NO	0.87
6.01.079.036	SINMARTIN	NV	RURAL	22	< 40 ?	M	170	89	30.8	PRESENT	ABSENT	YES	YES	NO	0.0088	241	7.7	183	4.2	5.3	0.78	68.95	NO	ABSENT	ABSENT	YES	NO	0.52
6.01.079.037	SINMARTIN	NV	RURAL	37	< 40 ?	M	163	90	33.87	PRESENT	ABSENT	NO	YES	NO	0.0107	104	3.1	207	1.5	5.8	0.95	83.98	NO	ABSENT	ABSENT	YES	NO	0.45
6.01.079.038	SINMARTIN	NV	RURAL	58	40-60	M	175	97	31.67	PRESENT	ABSENT	NO	NO	NO	0.0111	277	1.1	123	0.9	5.3	0.98	86.63	NO	ABSENT	ABSENT	YES	NO	0.73
6.01.079.039	SINMARTIN	NV	RURAL	51	40-60	F	157	84	34.08	PRESENT	ABSENT	NO	YES	NO	0.0086	43	14.4	171	8.4	5	0.76	67.18	NO	ABSENT	ABSENT	NO	NO
6.01.079.040	SINMARTIN	NV	RURAL	54	40-60	M	181	113	34.49	PRESENT	PRESENT	YES	NO	YES	0.0099	112	5.8	278	2.1	6.9	0.88	77.79	NO	ABSENT	ABSENT	NO	NO
6.02.001.001	BISTRITA	NV	URBAN	48	40-60	F	159	85	33.62	PRESENT	PRESENT	NO	NO	NO	0.0087	193	5.9	91	6.5	4.8	0.77	68.07	NO	ABSENT	ABSENT	NO	NO	0.68
6.02.001.002	BISTRITA	NV	URBAN	27	< 40 ?	F	174	77.8	25.7	ABSENT	PRESENT	NO	YES	NO	0.0059	180	6.9	140	4.9	5.1	0.52	45.97	NO	ABSENT	ABSENT	NO	NO	0.55
6.02.001.003	BISTRITA	NV	URBAN	50	40-60	F	159	76.6	30.3	PRESENT	PRESENT	NO	NO	NO	0.0082	75	6.3	86	7.3	5.7	0.73	64.53	NO	ABSENT	ABSENT	NO	NO	0.68
6.02.001.004	BISTRITA	NV	URBAN	74	>60	M	136	55.5	30.01	PRESENT	ABSENT	YES	NO	YES	0.0088	95	9.2	43	21.4	7	0.78	68.95	NO	ABSENT	ABSENT	NO	NO	0.9
6.02.001.005	BISTRITA	NV	URBAN	63	>60	F	159	70.9	28.04	ABSENT	PRESENT	NO	YES	NO	0.0095	203	5.8	145	4	5.3	0.84	74.26	NO	ABSENT	ABSENT	NO	NO	0.74
6.02.001.008	BISTRITA	NV	URBAN	61	>60	F	154	69.8	29.43	ABSENT	ABSENT	YES	NO	NO	0.0084	64	6.1	25	24.4	6.3	0.74	65.42	NO	ABSENT	ABSENT	NO	NO	0.6
6.02.001.009	BISTRITA	NV	URBAN	65	>60	F	151	64.6	28.33	ABSENT	ABSENT	YES	NO	NO	0.0068	134	6.8	147	4.6	3.6	0.6	53.04	NO	ABSENT	ABSENT	NO	NO	0.65
6.02.001.010	BISTRITA	NV	URBAN	76	>60	M	172	81	27.38	ABSENT	ABSENT	YES	NO	YES	0.0086	163	6.2	65	9.5	4.8	0.76	67.18	NO	.	ABSENT	.	0	0.9
6.02.001.011	BISTRITA	NV	URBAN	55	40-60	M	172	79	26.7	ABSENT	ABSENT	NO	NO	YES	0.0097	45	6.1	60	10.2	6.1	0.86	76.02	NO	ABSENT	ABSENT	NO	NO	0.53
6.02.001.012	BISTRITA	NV	URBAN	57	40-60	F	162	79.4	30.25	PRESENT	ABSENT	NO	YES	NO	0.0088	128	5.9	61	9.7	5.2	0.78	68.95	NO	ABSENT	ABSENT	NO	NO	0.61
6.02.001.013	BISTRITA	NV	URBAN	75	>60	F	162	66	25.15	ABSENT	ABSENT	YES	NO	NO	0.0116	180	5.5	66	8.3	6	1.03	91.05	NO	ABSENT	ABSENT	NO	NO	0.81
6.02.001.014	BISTRITA	NV	URBAN	24	< 40 ?	F	161	49	18.9	ABSENT	ABSENT	NO	YES	NO	0.0062	260	11.1	109	10.2	3.2	0.55	48.62	NO	ABSENT	ABSENT	NO	NO	0.52
6.02.001.015	BISTRITA	NV	URBAN	50	40-60	M	171	82.2	28.11	ABSENT	ABSENT	NO	NO	NO	0.0185	109	261.6	70	373.7	6.2	1.64	144.98	YES	ABSENT	PRESENT	YES	NO	0.56
6.02.001.016	BISTRITA	NV	URBAN	35	< 40 ?	M	171	86.8	29.68	ABSENT	PRESENT	NO	YES	NO	0.0098	158	5.8	119	4.9	5	0.87	76.91	NO	ABSENT	ABSENT	YES	NO	0.65
6.02.001.017	BISTRITA	NV	URBAN	39	< 40 ?	F	159	51	20.17	ABSENT	ABSENT	NO	YES	NO	0.0062	71	6.5	16	40.6	4	0.55	48.62	NO	ABSENT	ABSENT	NO	NO	0.58
6.02.001.018	BISTRITA	NV	URBAN	68	>60	F	154	62	26.14	ABSENT	ABSENT	NO	NO	NO	0.008	149	6.3	53	11.9	3.9	0.71	62.76	NO	ABSENT	ABSENT	NO	NO	0.86
6.02.001.019	BISTRITA	NV	URBAN	70	>60	M	172	80.4	27.18	ABSENT	ABSENT	YES	NO	NO	0.0093	201	5.5	108	5.1	6.5	0.82	72.49	NO	ABSENT	ABSENT	YES	NO	0.92
6.02.001.020	BISTRITA	NV	URBAN	61	>60	M	175	93	30.37	PRESENT	ABSENT	YES	NO	NO	0.0116	190	8.7	83	10.5	4.5	1.03	91.05	NO	ABSENT	ABSENT	NO	NO	0.99
6.02.001.021	BISTRITA	NV	URBAN	62	>60	F	158	68.4	27.4	ABSENT	ABSENT	YES	NO	YES	0.0071	207	6.4	151	4.2	2.7	0.63	55.69	NO	ABSENT	ABSENT	NO	NO	0.69
6.02.001.022	BISTRITA	NV	URBAN	29	< 40 ?	F	162	81	30.86	PRESENT	PRESENT	NO	NO	YES	0.0082	186	6.6	107	6.2	4.1	0.73	64.53	NO	ABSENT	ABSENT	NO	NO	0.46
6.02.001.023	BISTRITA	NV	URBAN	53	40-60	F	157	68.9	27.95	ABSENT	ABSENT	NO	NO	NO	0.0076	84	6.5	114	5.7	4.6	0.67	59.23	NO	ABSENT	ABSENT	YES	NO	0.7
6.02.001.024	BISTRITA	NV	URBAN	24	< 40 ?	M	171	82.8	28.32	ABSENT	PRESENT	NO	NO	NO	0.0101	138	11.3	164	6.9	7.8	0.89	78.68	NO	ABSENT	ABSENT	NO	NO	0.57
6.02.001.025	BISTRITA	NV	URBAN	25	< 40 ?	M	184	77	22.74	ABSENT	ABSENT	YES	NO	NO	0.0097	94	6.3	170	3.7	6.2	0.86	76.02	NO	ABSENT	ABSENT	NO	NO	0.49
6.02.001.026	BISTRITA	NV	URBAN	21	< 40 ?	M	172	67	22.65	ABSENT	PRESENT	NO	YES	NO	0.0102	207	6.6	239	2.8	7.1	0.9	79.56	NO	ABSENT	ABSENT	NO	NO	0.61
6.02.001.027	BISTRITA	NV	URBAN	61	>60	M	178	97.7	30.84	PRESENT	ABSENT	YES	YES	NO	0.0097	150	6.5	172	3.8	6.8	0.86	76.02	NO	ABSENT	ABSENT	YES	NO	0.85
6.02.018.001	FELDRU	NV	RURAL	42	40-60	F	161	117	45.14	PRESENT	ABSENT	YES	NO	NO	0.0123	81	436.2	49	890.2	6.1	1.09	96.36	UNKNOWN	ABSENT	PRESENT	NO	NO	0.58
6.02.018.002	FELDRU	NV	RURAL	76	>60	M	171	81.4	27.84	ABSENT	PRESENT	YES	NO	NO	0.0148	137	5.8	144	4	9.4	1.31	115.8	NO	ABSENT	ABSENT	NO	NO	0.85
6.02.018.003	FELDRU	NV	RURAL	48	40-60	M	183	86	25.68	ABSENT	PRESENT	YES	NO	NO	0.0104	75	6	120	5	5.1	0.92	81.33	NO	ABSENT	ABSENT	YES	NO	0.65
6.02.018.004	FELDRU	NV	RURAL	76	>60	F	152.5	83.2	35.78	PRESENT	ABSENT	NO	NO	NO	0.0096	208	6.1	118	5.2	5.1	0.85	75.14	NO	ABSENT	ABSENT	NO	NO	0.62
6.02.018.005	FELDRU	NV	RURAL	77	>60	F	150	89	39.56	PRESENT	ABSENT	YES	NO	NO	0.0097	79	7.6	146	5.2	5.2	0.86	76.02	NO	ABSENT	ABSENT	NO	NO	0.63
6.02.018.006	FELDRU	NV	RURAL	35	< 40 ?	M	184	106.3	31.4	PRESENT	PRESENT	YES	NO	NO	0.0097	73	6.4	77	8.3	6	0.86	76.02	NO	ABSENT	ABSENT	NO	NO	0.64
6.02.018.007	FELDRU	NV	RURAL	66	>60	F	150	78	34.67	PRESENT	ABSENT	YES	NO	NO	0.0067	140	5.7	55	10.4	5.6	0.59	52.16	NO	ABSENT	ABSENT	NO	NO	0.89
6.02.018.008	FELDRU	NV	RURAL	38	< 40 ?	F	165	61.9	22.74	ABSENT	ABSENT	YES	YES	NO	0.0088	119	5.8	155	3.7	5.4	0.78	68.95	NO	ABSENT	ABSENT	NO	NO	0.52
6.02.018.010	FELDRU	NV	RURAL	29	< 40 ?	F	168	81.5	28.88	ABSENT	PRESENT	NO	YES	NO	0.0059	126	6.6	49	13.5	3.2	0.52	45.97	NO	ABSENT	ABSENT	NO	NO	0.59
6.02.018.011	FELDRU	NV	RURAL	52	40-60	F	164	84.7	31.49	PRESENT	ABSENT	NO	YES	NO	0.0115	192	6.5	163	4	5	1.02	90.17	YES	ABSENT	PRESENT	NO	NO	0.65
6.02.018.013	FELDRU	NV	RURAL	18	< 40 ?	F	165	48	17.63	ABSENT	ABSENT	YES	YES	NO	0.0072	130	7.1	201	3.5	4.2	0.64	56.58	NO	ABSENT	ABSENT	NO	NO	0.44
6.02.018.014	FELDRU	NV	RURAL	25	< 40 ?	M	169	70.7	24.75	ABSENT	ABSENT	NO	NO	YES	0.0088	125	6.8	232	2.9	7.7	0.78	68.95	NO	ABSENT	ABSENT	NO	NO	0.49
6.03.001.002	CLUJ-NAPOCA	NV	URBAN	62	>60	M	163	81	30.49	PRESENT	ABSENT	YES	NO	NO	0.0111	200	6	85	7.1	7.5	0.98	86.63	NO	ABSENT	ABSENT	NO	NO
6.03.001.003	CLUJ-NAPOCA	NV	URBAN	61	>60	F	152	66	28.57	ABSENT	ABSENT	YES	NO	NO	0.0075	126	6.8	73	9.3	4.9	0.66	58.34	NO	ABSENT	ABSENT	NO	NO
6.03.001.004	CLUJ-NAPOCA	NV	URBAN	62	>60	F	163	82	30.86	PRESENT	ABSENT	YES	YES	NO	0.0075	140	5.9	90	6.6	3	0.66	58.34	NO	ABSENT	ABSENT	NO	NO
6.03.001.005	CLUJ-NAPOCA	NV	URBAN	62	>60	F	158	65	26.04	ABSENT	ABSENT	YES	NO	NO	0.0086	150	8.4	71	11.8	4	0.76	67.18	NO	ABSENT	ABSENT	NO	NO
6.03.001.006	CLUJ-NAPOCA	NV	URBAN	77	>60	M	155	99.5	41.42	PRESENT	ABSENT	NO	YES	NO	0.0095	86	6.1	44	13.9	6.3	0.84	74.26	NO	ABSENT	ABSENT	NO	NO
6.03.001.008	CLUJ-NAPOCA	NV	URBAN	72	>60	F	160	75	29.3	ABSENT	ABSENT	NO	YES	YES	0.0116	161	6.3	49	12.9	5.3	1.03	91.05	NO	ABSENT	ABSENT	NO	NO
6.03.001.009	CLUJ-NAPOCA	NV	URBAN	64	>60	F	162	57	21.72	ABSENT	ABSENT	NO	YES	NO	0.0064	36	6.2	22	28.2	5.4	0.57	50.39	NO	ABSENT	ABSENT	NO	NO
6.03.001.010	CLUJ-NAPOCA	NV	URBAN	69	>60	F	159	66.9	26.46	ABSENT	ABSENT	NO	NO	YES	0.0076	111	6.5	42	15.5	5.5	0.67	59.23	NO	ABSENT	ABSENT	NO	NO
6.03.001.011	CLUJ-NAPOCA	NV	URBAN	69	>60	F	154	73.9	31.16	PRESENT	ABSENT	YES	NO	NO	0.0079	150	6	55	10.9	3.7	0.7	61.88	NO	ABSENT	ABSENT	NO	NO
6.03.001.012	CLUJ-NAPOCA	NV	URBAN	60	>60	M	170	102	35.29	PRESENT	ABSENT	YES	NO	NO	0.0112	106	6.8	169	4	4.5	0.99	87.52	NO	ABSENT	ABSENT	NO	NO
6.03.001.013	CLUJ-NAPOCA	NV	URBAN	58	40-60	F	161	66	25.46	ABSENT	ABSENT	NO	NO	NO	0.0081	32	6	27	22.2	3.8	0.72	63.65	NO	.	ABSENT	.	.
6.03.001.014	CLUJ-NAPOCA	NV	URBAN	56	40-60	F	156	74	30.41	PRESENT	ABSENT	YES	NO	NO	0.0093	293	6	211	2.8	5	0.82	72.49	NO	ABSENT	ABSENT	YES	NO
6.03.001.015	CLUJ-NAPOCA	NV	URBAN	54	40-60	F	153	68.4	29.22	ABSENT	ABSENT	NO	YES	NO	0.0088	81	6.3	190	3.3	6.7	0.78	68.95	NO	ABSENT	ABSENT	YES	NO
6.03.001.016	CLUJ-NAPOCA	NV	URBAN	60	>60	M	168	84	29.76	ABSENT	ABSENT	NO	NO	NO	0.0094	196	6.2	127	4.9	8	0.83	73.37	NO	ABSENT	ABSENT	NO	NO	0.61
6.03.001.017	CLUJ-NAPOCA	NV	URBAN	76	>60	M	166	79	28.67	ABSENT	PRESENT	YES	NO	NO	0.0136	95	14	77	18.2	6.6	1.2	106.08	YES	ABSENT	PRESENT	NO	NO	1
6.03.001.018	CLUJ-NAPOCA	NV	URBAN	59	40-60	F	158	59	23.63	ABSENT	ABSENT	NO	NO	NO	0.0075	72	6.6	86	7.7	3.1	0.66	58.34	NO	ABSENT	ABSENT	NO	NO	0.85
6.03.001.019	CLUJ-NAPOCA	NV	URBAN	28	< 40 ?	F	160	61	23.83	ABSENT	ABSENT	NO	YES	NO	0.0058	124	6.2	56	11.1	3.2	0.51	45.08	NO	ABSENT	ABSENT	YES	NO	0.82
6.03.001.020	CLUJ-NAPOCA	NV	URBAN	25	< 40 ?	F	169	58	20.31	ABSENT	ABSENT	NO	YES	NO	0.0072	221	6.5	193	3.4	2.9	0.64	56.58	NO	ABSENT	ABSENT	NO	NO	0.54
6.03.001.021	CLUJ-NAPOCA	NV	URBAN	28	< 40 ?	M	176	123	39.71	PRESENT	ABSENT	NO	YES	NO	0.0096	226	6.2	155	4	5.8	0.85	75.14	NO	ABSENT	ABSENT	NO	NO	0.5
6.03.001.022	CLUJ-NAPOCA	NV	URBAN	27	< 40 ?	F	163	63	23.71	ABSENT	ABSENT	NO	YES	NO	0.0067	232	6.4	224	2.9	2.9	0.59	52.16	.	ABSENT	ABSENT	YES	NO	0.51
6.03.001.023	CLUJ-NAPOCA	NV	URBAN	25	< 40 ?	F	172	55	18.59	ABSENT	ABSENT	NO	YES	NO	0.0089	55	6.4	65	9.8	4.6	0.79	69.84	NO	ABSENT	ABSENT	NO	NO
6.03.001.024	CLUJ-NAPOCA	NV	URBAN	54	40-60	M	180	84	25.93	ABSENT	ABSENT	YES	YES	NO	0.0094	215	6.2	139	4.5	6.5	0.83	73.37	NO	ABSENT	ABSENT	NO	NO
6.03.001.025	CLUJ-NAPOCA	NV	URBAN	36	< 40 ?	F	170	71	24.57	ABSENT	ABSENT	YES	NO	YES	0.0079	109	6.3	139	4.5	4.9	0.7	61.88	.	ABSENT	ABSENT	NO	NO
6.03.001.026	CLUJ-NAPOCA	NV	URBAN	66	>60	F	160.2	76.5	29.81	ABSENT	ABSENT	YES	NO	NO	0.0086	61	6.3	32	19.7	7.9	0.76	67.18	NO	ABSENT	ABSENT	NO	NO
6.03.001.027	CLUJ-NAPOCA	NV	URBAN	61	>60	F	164	56	20.82	ABSENT	PRESENT	NO	NO	NO	0.0069	150	6.2	81	7.7	3.1	0.61	53.92	NO	.	ABSENT	.	.
6.03.001.028	CLUJ-NAPOCA	NV	URBAN	40	40-60	M	198	98	25	ABSENT	ABSENT	NO	YES	YES	0.0108	162	6.3	237	2.7	5.5	0.96	84.86	NO	.	ABSENT	.	.
6.03.001.029	CLUJ-NAPOCA	NV	URBAN	30	< 40 ?	M	184	69	20.38	ABSENT	ABSENT	NO	YES	NO	0.0088	245	6.6	228	2.9	6.2	0.78	68.95	NO	ABSENT	ABSENT	NO	NO
6.03.037.001	FLORESTI	NV	RURAL	26	< 40 ?	M	174	76	25.1	ABSENT	ABSENT	NO	YES	NO	0.0105	199	14.1	341	4.1	5	0.93	82.21	NO	ABSENT	ABSENT	NO	NO
6.03.037.003	FLORESTI	NV	RURAL	49	40-60	F	165	67	24.61	ABSENT	ABSENT	YES	NO	NO	0.0063	275	6.2	94	6.6	2.9	0.56	49.5	NO	ABSENT	ABSENT	NO	NO	0.65
6.03.037.004	FLORESTI	NV	RURAL	48	40-60	F	162	64.5	24.58	ABSENT	ABSENT	YES	YES	NO	0.0087	118	6.1	81	7.5	4.2	0.77	68.07	NO	ABSENT	ABSENT	NO	NO	0.51
6.03.037.005	FLORESTI	NV	RURAL	61	>60	F	148	60.5	27.62	ABSENT	ABSENT	YES	NO	NO	0.0087	142	6.1	79	7.7	4.2	0.77	68.07	NO	ABSENT	ABSENT	NO	NO
6.03.037.006	FLORESTI	NV	RURAL	33	< 40 ?	M	178	79	24.93	ABSENT	PRESENT	NO	NO	NO	0.0089	181	6.6	227	2.9	3.6	0.79	69.84	NO	ABSENT	ABSENT	YES	NO	0.61
6.03.037.007	FLORESTI	NV	RURAL	69	>60	M	166	80	29.03	ABSENT	ABSENT	YES	NO	NO	0.0094	182	6.3	126	5	7.2	0.83	73.37	.	ABSENT	ABSENT	YES	NO
6.03.037.008	FLORESTI	NV	RURAL	64	>60	F	168	81	28.7	ABSENT	ABSENT	YES	NO	YES	0.0103	171	6.1	74	8.2	5.2	0.91	80.44	NO	ABSENT	ABSENT	NO	NO
6.03.037.009	FLORESTI	NV	RURAL	63	>60	F	162	62.5	23.81	ABSENT	ABSENT	NO	NO	NO	0.0061	109	6	74	8.1	5	0.54	47.74	NO	ABSENT	ABSENT	UNKNOWN	NO	0.67
6.03.037.010	FLORESTI	NV	RURAL	64	>60	M	181	94.1	28.72	ABSENT	ABSENT	NO	NO	NO	0.009	153	6	116	5.2	6.1	0.8	70.72	NO	ABSENT	ABSENT	YES	NO	0.85
6.03.037.011	FLORESTI	NV	RURAL	41	40-60	F	173	74.2	24.79	ABSENT	ABSENT	YES	NO	NO	0.007	131	10.1	64	15.8	3.8	0.62	54.81	NO	ABSENT	ABSENT	YES	NO	0.5
6.03.037.012	FLORESTI	NV	RURAL	52	40-60	M	178	104.7	33.05	PRESENT	ABSENT	YES	YES	NO	0.011	90	6.2	104	6	6	0.97	85.75	NO	.	ABSENT	.	.	0.9
6.03.037.013	FLORESTI	NV	RURAL	64	>60	M	171	80.1	27.39	ABSENT	ABSENT	YES	NO	NO	0.0125	122	28.9	105	27.5	9.2	1.11	98.12	NO	ABSENT	ABSENT	YES	NO	0.84
6.03.037.014	FLORESTI	NV	RURAL	42	40-60	M	154	66	27.83	ABSENT	ABSENT	NO	YES	NO	0.0104	229	6.2	79	7.8	5.4	0.92	81.33	NO	ABSENT	ABSENT	NO	NO	0.5
6.03.037.015	FLORESTI	NV	RURAL	74	>60	F	150	42.1	18.71	ABSENT	ABSENT	YES	NO	NO	0.0162	98	5.5	53	10.4	9.8	1.43	126.41	.	ABSENT	ABSENT	NO	NO	0.55
6.03.037.016	FLORESTI	NV	RURAL	75	>60	M	162	73	27.82	ABSENT	ABSENT	NO	NO	NO	0.0085	108	81.8	92	88.9	4.5	0.75	66.3	NO	ABSENT	ABSENT	NO	NO	1.22
6.03.037.017	FLORESTI	NV	RURAL	76	>60	F	165	75	27.55	ABSENT	ABSENT	YES	NO	NO	0.0099	196	5.9	68	8.7	5.2	0.88	77.79	NO	ABSENT	ABSENT	NO	NO	0.69
6.03.037.018	FLORESTI	NV	RURAL	46	40-60	F	168	68	24.09	ABSENT	ABSENT	YES	YES	NO	0.0103	100	6.2	68	9.1	5.5	0.91	80.44	NO	ABSENT	ABSENT	NO	NO	0.63
6.03.037.019	FLORESTI	NV	RURAL	33	< 40 ?	M	188	66.9	18.93	ABSENT	ABSENT	NO	YES	NO	0.0078	107	9.8	137	7.2	5	0.69	61	NO	ABSENT	ABSENT	NO	NO	0.48
6.03.037.020	FLORESTI	NV	RURAL	39	< 40 ?	F	152	73.7	31.9	PRESENT	PRESENT	NO	YES	NO	0.0066	131	14.9	228	6.5	5.2	0.58	51.27	YES	ABSENT	PRESENT	NO	NO	0.71
6.03.037.021	FLORESTI	NV	RURAL	29	< 40 ?	F	162	70	26.67	ABSENT	ABSENT	NO	YES	YES	0.0054	157	9.1	113	8.1	2.8	0.48	42.43	NO	ABSENT	ABSENT	YES	NO	0.57
6.03.037.023	FLORESTI	NV	RURAL	66	>60	F	156	68	27.94	ABSENT	ABSENT	YES	YES	NO	0.0087	176	6.2	58	10.7	5.5	0.77	68.07	NO	ABSENT	ABSENT	NO	NO	0.8
6.03.037.025	FLORESTI	NV	RURAL	48	40-60	M	179	119.5	37.3	PRESENT	PRESENT	YES	NO	YES	0.0108	224	6.4	135	4.7	3.8	0.96	84.86	NO	ABSENT	ABSENT	NO	NO	0.84
6.03.037.026	FLORESTI	NV	RURAL	64	>60	F	161	70.3	27.12	ABSENT	ABSENT	YES	NO	NO	0.0114	40	6.3	32	19.7	6.2	1.01	89.28	NO	ABSENT	ABSENT	NO	NO	0.9
6.03.037.027	FLORESTI	NV	RURAL	71	>60	M	170	71.1	24.6	ABSENT	ABSENT	YES	YES	NO	0.009	173	6.4	49	13.1	3.8	0.8	70.72	NO	ABSENT	ABSENT	YES	NO	0.58
6.03.037.028	FLORESTI	NV	RURAL	44	40-60	F	162	74.1	28.24	ABSENT	PRESENT	YES	NO	YES	0.0069	233	14.7	90	16.3	4	0.61	53.92	NO	ABSENT	ABSENT	YES	NO	0.72
6.03.037.030	FLORESTI	NV	RURAL	24	< 40 ?	M	183	84	25.08	ABSENT	ABSENT	NO	YES	NO	0.007	236	6.4	134	4.8	5.1	0.62	54.81	NO	ABSENT	ABSENT	NO	NO	0.53
6.03.037.032	FLORESTI	NV	RURAL	29	< 40 ?	F	160	72.3	28.24	ABSENT	ABSENT	YES	YES	NO	0.0063	121	6.5	104	6.3	5	0.56	49.5	NO	ABSENT	ABSENT	NO	NO	0.49
6.04.001.001	BAIA MARE	NV	URBAN	57	40-60	F	168	68.5	24.27	ABSENT	ABSENT	NO	YES	NO	0.0077	56	5.8	66	8.8	3	0.68	60.11	NO	ABSENT	ABSENT	NO	NO	0.98
6.04.001.002	BAIA MARE	NV	URBAN	65	>60	M	170	76.2	26.37	ABSENT	ABSENT	NO	NO	NO	0.0108	86	6.8	207	3.3	5.1	0.96	84.86	NO	ABSENT	ABSENT	NO	NO	0.8
6.04.001.003	BAIA MARE	NV	URBAN	66	>60	F	151	84.1	36.88	PRESENT	ABSENT	NO	YES	NO	0.0089	137	6.1	120	5.1	7.9	0.79	69.84	NO	ABSENT	ABSENT	NO	NO	0.66
6.04.001.004	BAIA MARE	NV	URBAN	72	>60	F	168	102.5	36.32	PRESENT	ABSENT	YES	NO	NO	0.017	100	5.8	81	7.2	9.9	1.5	132.6	YES	ABSENT	PRESENT	NO	NO	0.74
6.04.001.005	BAIA MARE	NV	URBAN	71	>60	F	158	79	31.65	PRESENT	ABSENT	YES	NO	NO	0.0075	59	6.6	40	16.5	6.4	0.66	58.34	NO	ABSENT	ABSENT	YES	NO	0.73
6.04.001.006	BAIA MARE	NV	URBAN	51	40-60	M	174	96.9	32.01	PRESENT	ABSENT	YES	NO	NO	0.009	218	6.1	99	6.2	7	0.8	70.72	NO	ABSENT	ABSENT	NO	NO	1.04
6.04.001.007	BAIA MARE	NV	URBAN	62	>60	M	177	104.6	33.39	PRESENT	PRESENT	YES	NO	NO	0.0085	123	6.1	141	4.3	7	0.75	66.3	NO	ABSENT	ABSENT	NO	NO	0.9
6.04.001.008	BAIA MARE	NV	URBAN	62	>60	M	179	92.6	28.9	ABSENT	PRESENT	YES	NO	NO	0.0093	60	6.3	51	12.4	4.5	0.82	72.49	NO	ABSENT	ABSENT	NO	NO	0.8
6.04.001.009	BAIA MARE	NV	URBAN	45	40-60	F	175	104.3	34.06	PRESENT	ABSENT	NO	YES	NO	0.0073	161	6.2	162	3.8	4.8	0.65	57.46	NO	ABSENT	ABSENT	YES	NO	0.6
6.04.001.010	BAIA MARE	NV	URBAN	56	40-60	F	155	72.6	30.22	PRESENT	ABSENT	NO	YES	NO	0.0084	141	6.1	96	6.4	4.1	0.74	65.42	NO	ABSENT	ABSENT	YES	NO	0.46
6.04.001.011	BAIA MARE	NV	URBAN	36	< 40 ?	F	167	90	32.27	PRESENT	ABSENT	NO	NO	NO	0.0078	108	5.1	154	3.3	4.4	0.69	61	NO	ABSENT	ABSENT	YES	NO	0.49
6.04.001.012	BAIA MARE	NV	URBAN	50	40-60	M	166	95.1	34.51	PRESENT	ABSENT	NO	NO	NO	0.0094	139	6.5	247	2.6	6.9	0.83	73.37	NO	ABSENT	ABSENT	NO	NO	0.51
6.04.001.013	BAIA MARE	NV	URBAN	18	< 40 ?	M	177	69.3	22.12	ABSENT	ABSENT	NO	YES	NO	0.008	72	6.8	154	4.4	5.5	0.71	62.76	NO	ABSENT	ABSENT	NO	NO	0.54
6.04.001.014	BAIA MARE	NV	URBAN	18	< 40 ?	F	169	54.7	19.15	ABSENT	PRESENT	NO	YES	NO	0.0077	97	6.4	228	2.8	3.8	0.68	60.11	NO	ABSENT	ABSENT	NO	NO	0.41
6.04.001.015	BAIA MARE	NV	URBAN	63	>60	F	161	78	30.09	PRESENT	ABSENT	NO	YES	NO	0.0087	140	21.9	51	42.9	6	0.77	68.07	NO	ABSENT	ABSENT	NO	NO	0.66
6.04.001.016	BAIA MARE	NV	URBAN	61	>60	F	154	71.9	30.32	PRESENT	ABSENT	NO	YES	YES	0.0068	153	6.2	112	5.5	4.1	0.6	53.04	NO	PRESENT	PRESENT	YES	NO	0.58
6.04.001.017	BAIA MARE	NV	URBAN	64	>60	M	168	88.1	31.21	PRESENT	ABSENT	YES	NO	NO	0.0151	194	8	153	5.2	3.9	1.34	118.46	NO	ABSENT	ABSENT	NO	NO	0.6
6.04.001.018	BAIA MARE	NV	URBAN	55	40-60	M	192	111.8	30.33	PRESENT	PRESENT	YES	NO	NO	0.0097	195	6.6	131	5	4.6	0.86	76.02	NO	ABSENT	ABSENT	NO	NO	0.67
6.04.001.019	BAIA MARE	NV	URBAN	24	< 40 ?	F	160	49.2	19.22	ABSENT	ABSENT	NO	YES	NO	0.0067	114	6	69	8.7	3.8	0.59	52.16	NO	ABSENT	ABSENT	NO	NO	0.53
6.04.001.020	BAIA MARE	NV	URBAN	38	< 40 ?	M	166	75.6	27.44	ABSENT	ABSENT	YES	NO	NO	0.0105	120	6.1	65	9.4	5.2	0.93	82.21	NO	ABSENT	ABSENT	NO	NO	0.55
6.04.001.021	BAIA MARE	NV	URBAN	51	40-60	F	166	63	22.86	ABSENT	ABSENT	NO	YES	NO	0.0088	69	6.3	94	6.7	3.3	0.78	68.95	NO	ABSENT	ABSENT	NO	NO	0.64
6.04.001.022	BAIA MARE	NV	URBAN	53	40-60	F	162	114.1	43.48	PRESENT	ABSENT	YES	YES	NO	0.0084	168	1.7	119	1.4	7.1	0.74	65.42	NO	ABSENT	ABSENT	YES	NO	0.52
6.04.001.023	BAIA MARE	NV	URBAN	44	40-60	F	159	59.5	23.54	ABSENT	ABSENT	NO	YES	YES	0.0062	29	6	56	10.7	4	0.55	48.62	NO	ABSENT	ABSENT	NO	NO	0.53
6.04.001.024	BAIA MARE	NV	URBAN	32	< 40 ?	F	158	63.9	25.6	ABSENT	ABSENT	NO	NO	YES	0.0077	145	13.2	147	9	4	0.68	60.11	NO	ABSENT	ABSENT	NO	NO	0.62
6.04.001.025	BAIA MARE	NV	URBAN	43	40-60	M	167	82	29.4	ABSENT	ABSENT	NO	YES	NO	0.0095	36	6	26	23.1	6.2	0.84	74.26	NO	ABSENT	ABSENT	NO	NO	0.66
6.04.001.026	BAIA MARE	NV	URBAN	72	>60	F	158	86	34.45	PRESENT	ABSENT	YES	NO	NO	0.0101	90	7.3	134	5.4	6.3	0.89	78.68	NO	ABSENT	ABSENT	NO	NO	0.77
6.04.001.027	BAIA MARE	NV	URBAN	25	< 40 ?	F	161	65	25.08	ABSENT	ABSENT	YES	YES	NO	0.0071	101	6.5	200	3.3	6.1	0.63	55.69	NO	ABSENT	ABSENT	NO	NO	0.47
6.04.001.028	BAIA MARE	NV	URBAN	80	>60	M	171	82.5	28.21	ABSENT	ABSENT	NO	YES	NO	0.0105	195	6.2	145	4.3	6.2	0.93	82.21	.	ABSENT	ABSENT	NO	NO	0.85
6.04.001.029	BAIA MARE	NV	URBAN	41	40-60	F	169	55	19.26	ABSENT	PRESENT	NO	NO	NO	0.0069	89	3.4	164	2.1	2.9	0.61	53.92	NO	ABSENT	ABSENT	NO	NO	0.61
6.04.001.030	BAIA MARE	NV	URBAN	32	< 40 ?	M	175	84	27.43	ABSENT	PRESENT	YES	NO	NO	0.0093	79	1.2	76	1.6	5.6	0.82	72.49	NO	ABSENT	ABSENT	NO	NO	0.62
6.04.001.031	BAIA MARE	NV	URBAN	30	< 40 ?	M	185	85	24.84	ABSENT	PRESENT	NO	NO	YES	0.0107	73	11.9	217	5.5	5.8	0.95	83.98	NO	ABSENT	ABSENT	NO	NO	0.62
6.04.048.001	MOISEI	NV	RURAL	41	40-60	M	171	67	22.91	ABSENT	ABSENT	NO	YES	NO	0.009	138	6.5	185	3.5	4.4	0.8	70.72	NO	ABSENT	ABSENT	NO	NO	0.6
6.04.048.002	MOISEI	NV	RURAL	53	40-60	F	153	92	39.3	PRESENT	ABSENT	YES	NO	NO	0.0078	157	9.6	124	7.7	7.4	0.69	61	NO	ABSENT	ABSENT	YES	NO	0.81
6.04.048.003	MOISEI	NV	RURAL	54	40-60	M	176	107.3	34.64	PRESENT	ABSENT	YES	NO	NO	0.0105	251	6.1	81	7.5	6	0.93	82.21	UNKNOWN	ABSENT	ABSENT	YES	NO	0.68
6.04.048.004	MOISEI	NV	RURAL	35	< 40 ?	F	164	72.1	26.81	ABSENT	ABSENT	NO	YES	NO	0.0073	109	6.1	128	4.8	4.9	0.65	57.46	NO	ABSENT	ABSENT	NO	NO	0.54
6.04.048.005	MOISEI	NV	RURAL	56	40-60	M	169	102	35.71	PRESENT	ABSENT	YES	NO	NO	0.0104	93	7.3	153	4.8	9	0.92	81.33	UNKNOWN	ABSENT	ABSENT	YES	NO	0.62
6.04.048.006	MOISEI	NV	RURAL	54	40-60	M	171	96.5	33	PRESENT	ABSENT	YES	NO	NO	0.0087	155	6.1	156	3.9	7.2	0.77	68.07	NO	ABSENT	ABSENT	NO	NO	0.64
6.04.048.007	MOISEI	NV	RURAL	55	40-60	M	164	69.6	25.88	ABSENT	PRESENT	YES	NO	NO	0.0165	191	39.8	137	29.1	5.2	1.46	129.06	NO	ABSENT	ABSENT	YES	NO	0.65
6.04.048.008	MOISEI	NV	RURAL	60	>60	M	172	108.3	36.61	PRESENT	ABSENT	YES	NO	YES	0.0108	29	6.3	61	10.3	8.5	0.96	84.86	NO	ABSENT	ABSENT	NO	NO	0.57
6.04.048.009	MOISEI	NV	RURAL	67	>60	M	178	96	30.3	PRESENT	ABSENT	NO	NO	NO	0.0082	163	6.1	84	7.3	5	0.73	64.53	NO	.	ABSENT	.	0	0.92
6.04.048.010	MOISEI	NV	RURAL	76	>60	M	163	87	32.74	PRESENT	ABSENT	YES	NO	NO	0.0107	181	13.5	78	17.3	9.2	0.95	83.98	NO	ABSENT	ABSENT	NO	NO	0.78
6.04.048.011	MOISEI	NV	RURAL	58	40-60	F	165	93.5	34.34	PRESENT	ABSENT	NO	NO	NO	0.0069	59	6.4	17	37.6	5.1	0.61	53.92	NO	ABSENT	ABSENT	NO	NO	0.72
6.04.048.012	MOISEI	NV	RURAL	57	40-60	F	159	85.8	33.94	PRESENT	ABSENT	YES	YES	YES	0.0096	151	7.3	162	4.5	5.1	0.85	75.14	NO	ABSENT	ABSENT	NO	NO	0.59
6.04.048.013	MOISEI	NV	RURAL	67	>60	M	165	83.8	30.78	PRESENT	ABSENT	NO	YES	NO	0.0076	252	6.1	94	6.5	4.2	0.67	59.23	NO	ABSENT	ABSENT	NO	NO	0.77
6.04.048.014	MOISEI	NV	RURAL	30	< 40 ?	F	166	85.4	30.99	PRESENT	ABSENT	NO	YES	NO	0.0086	69	6.3	193	3.3	3.9	0.76	67.18	NO	ABSENT	ABSENT	NO	NO	0.51
6.04.048.015	MOISEI	NV	RURAL	48	40-60	F	160	59.3	23.16	ABSENT	ABSENT	NO	YES	NO	0.0085	84	6.4	60	10.7	3.5	0.75	66.3	NO	ABSENT	ABSENT	NO	NO	0.52
6.04.048.016	MOISEI	NV	RURAL	45	40-60	M	166	64	23.23	ABSENT	ABSENT	YES	YES	NO	0.0087	69	18.9	66	28.6	6.2	0.77	68.07	NO	ABSENT	ABSENT	NO	NO	0.64
6.04.048.017	MOISEI	NV	RURAL	73	>60	F	158	86	34.45	PRESENT	ABSENT	YES	NO	NO	0.0078	84	6.1	37	16.5	7.4	0.69	61	NO	ABSENT	ABSENT	NO	NO	0.63
6.04.048.018	MOISEI	NV	RURAL	37	< 40 ?	F	167	75.8	27.18	ABSENT	ABSENT	YES	NO	NO	0.0068	162	6.3	136	4.6	3.3	0.6	53.04	NO	ABSENT	ABSENT	NO	NO	0.67
6.04.048.019	MOISEI	NV	RURAL	77	>60	M	166	85.9	31.17	PRESENT	ABSENT	YES	NO	NO	0.0081	77	5.5	93	5.9	5.9	0.72	63.65	NO	ABSENT	ABSENT	YES	NO	0.95
6.04.048.020	MOISEI	NV	RURAL	27	< 40 ?	M	184	88.7	26.2	ABSENT	ABSENT	NO	YES	NO	0.0081	169	6.1	209	2.9	4.4	0.72	63.65	NO	ABSENT	ABSENT	NO	NO	0.44
6.04.048.021	MOISEI	NV	RURAL	27	< 40 ?	F	163	59.3	22.32	ABSENT	ABSENT	NO	YES	YES	0.0068	74	6.7	83	8.1	3.2	0.6	53.04	NO	ABSENT	ABSENT	NO	NO	0.45
6.04.048.022	MOISEI	NV	RURAL	36	< 40 ?	M	174	71	23.45	ABSENT	PRESENT	NO	YES	NO	0.0094	164	6.1	71	8.6	5.4	0.83	73.37	NO	ABSENT	ABSENT	NO	NO	0.64
6.04.048.024	MOISEI	NV	RURAL	45	40-60	F	160	69.5	27.15	ABSENT	ABSENT	NO	YES	YES	0.0058	82	7.4	138	5.4	4.7	0.51	45.08	NO	ABSENT	ABSENT	NO	NO	0.67
6.04.048.025	MOISEI	NV	RURAL	64	>60	M	164	80.5	29.93	ABSENT	ABSENT	NO	NO	NO	0.0102	110	6.3	88	7.2	7.5	0.9	79.56	NO	ABSENT	ABSENT	NO	NO	0.92
6.04.048.026	MOISEI	NV	RURAL	58	40-60	F	156	85	34.93	PRESENT	ABSENT	YES	YES	NO	0.0102	142	6.6	61	10.8	6.7	0.9	79.56	NO	ABSENT	ABSENT	YES	NO	0.56
6.04.048.027	MOISEI	NV	RURAL	26	< 40 ?	M	178	67.4	21.27	ABSENT	ABSENT	NO	YES	NO	0.0102	148	6.4	106	6	4.6	0.9	79.56	NO	ABSENT	ABSENT	NO	NO	0.46
6.05.001.001	SATU MARE	NV	URBAN	65	>60	M	180	95	29.32	ABSENT	ABSENT	NO	NO	YES	0.0106	112	6	249	2.4	6.6	0.94	83.1	NO	ABSENT	ABSENT	NO	NO
6.05.001.002	SATU MARE	NV	URBAN	22	< 40 ?	M	158	56	22.43	ABSENT	ABSENT	NO	YES	NO	0.0087	190	6.3	193	3.3	4.4	0.77	68.07	NO	ABSENT	ABSENT	NO	NO
6.05.001.003	SATU MARE	NV	URBAN	78	>60	M	162	62	23.62	ABSENT	ABSENT	YES	NO	YES	0.0092	140	6.3	85	7.4	6.1	0.81	71.6	NO	ABSENT	ABSENT	NO	NO
6.05.001.004	SATU MARE	NV	URBAN	76	>60	F	149	60	27.03	ABSENT	ABSENT	YES	NO	NO	0.009	165	6.1	38	16.1	5.1	0.8	70.72	NO	ABSENT	ABSENT	NO	NO
6.05.001.005	SATU MARE	NV	URBAN	56	40-60	M	167	113	40.52	PRESENT	ABSENT	YES	NO	NO	0.0147	115	23.2	317	7.3	7.7	1.3	114.92	NO	ABSENT	ABSENT	NO	NO
6.05.001.006	SATU MARE	NV	URBAN	64	>60	M	172	80	27.04	ABSENT	ABSENT	NO	NO	YES	0.0114	183	6.1	120	5.1	5.5	1.01	89.28	.	ABSENT	ABSENT	YES	NO
6.05.001.007	SATU MARE	NV	URBAN	43	40-60	F	161	73	28.16	ABSENT	ABSENT	YES	YES	NO	0.0077	27	6.4	62	10.3	2.7	0.68	60.11	NO	ABSENT	ABSENT	NO	NO
6.05.001.008	SATU MARE	NV	URBAN	60	>60	F	149	57	25.67	ABSENT	PRESENT	NO	YES	NO	0.0088	38	6.4	55	11.6	6.4	0.78	68.95	NO	ABSENT	ABSENT	NO	NO
6.05.001.009	SATU MARE	NV	URBAN	18	< 40 ?	F	157	59	23.94	ABSENT	ABSENT	NO	YES	NO	0.0067	197	15.6	128	12.2	4.2	0.59	52.16	NO	ABSENT	ABSENT	NO	NO
6.05.001.010	SATU MARE	NV	URBAN	46	40-60	F	170	63	21.8	ABSENT	ABSENT	YES	YES	NO	0.0072	184	6.3	109	5.8	4.3	0.64	56.58	NO	ABSENT	ABSENT	NO	NO
6.05.001.011	SATU MARE	NV	URBAN	53	40-60	F	166	71	25.77	ABSENT	PRESENT	NO	YES	NO	0.0079	57	6.5	70	9.3	3.6	0.7	61.88	NO	ABSENT	ABSENT	NO	NO
6.05.001.012	SATU MARE	NV	URBAN	23	< 40 ?	F	155	57.5	23.93	ABSENT	ABSENT	NO	YES	NO	0.0084	120	6	160	3.8	4.2	0.74	65.42	YES	ABSENT	PRESENT	NO	NO
6.05.001.013	SATU MARE	NV	URBAN	28	< 40 ?	F	160	60	23.44	ABSENT	PRESENT	YES	YES	YES	0.0073	111	6	139	4.3	4.6	0.65	57.46	NO	ABSENT	ABSENT	NO	NO
6.05.001.014	SATU MARE	NV	URBAN	28	< 40 ?	F	161	49	18.9	ABSENT	ABSENT	NO	YES	NO	0.0068	220	6	85	7.1	4.1	0.6	53.04	NO	ABSENT	ABSENT	NO	NO
6.05.001.015	SATU MARE	NV	URBAN	78	>60	M	169	76	26.61	ABSENT	ABSENT	YES	NO	NO	0.0076	154	6	141	4.3	4.3	0.67	59.23	NO	ABSENT	ABSENT	NO	NO
6.05.001.016	SATU MARE	NV	URBAN	74	>60	F	150	83	36.89	PRESENT	ABSENT	YES	NO	YES	0.0075	66	7.1	30	23.7	6.2	0.66	58.34	NO	ABSENT	ABSENT	YES	NO
6.05.001.017	SATU MARE	NV	URBAN	54	40-60	M	165	82.5	30.3	PRESENT	ABSENT	YES	NO	NO	0.0114	158	6.5	90	7.2	5.5	1.01	89.28	NO	ABSENT	ABSENT	NO	NO
6.05.001.018	SATU MARE	NV	URBAN	18	< 40 ?	M	173	97	32.41	PRESENT	PRESENT	NO	YES	NO	0.0125	98	5.9	175	3.4	5	1.11	98.12	NO	.	ABSENT	.	0
6.05.001.019	SATU MARE	NV	URBAN	35	< 40 ?	M	175	80	26.12	ABSENT	PRESENT	NO	YES	NO	0.0101	117	6.7	208	3.2	4.9	0.89	78.68	NO	ABSENT	ABSENT	YES	NO
6.05.001.020	SATU MARE	NV	URBAN	37	< 40 ?	F	162	65	24.77	ABSENT	ABSENT	NO	YES	YES	0.0094	93	6.4	144	4.4	4.9	0.83	73.37	NO	ABSENT	ABSENT	NO	NO
6.05.001.021	SATU MARE	NV	URBAN	31	< 40 ?	M	181	100	30.52	PRESENT	ABSENT	YES	NO	NO	0.0108	236	6.9	223	3.1	4.7	0.96	84.86	NO	ABSENT	ABSENT	NO	NO
6.05.040.001	ODOREU	NV	RURAL	67	>60	F	148	71	32.41	PRESENT	ABSENT	YES	YES	NO	0.0094	158	6	20	30	4.2	0.83	73.37	UNKNOWN	ABSENT	ABSENT	NO	NO
6.05.040.002	ODOREU	NV	RURAL	79	>60	F	158	69	27.64	ABSENT	ABSENT	YES	NO	YES	0.0076	81	13.9	39	35.6	4.3	0.67	59.23	NO	ABSENT	ABSENT	YES	NO
6.05.040.003	ODOREU	NV	RURAL	43	40-60	F	161	95	36.65	PRESENT	PRESENT	NO	NO	NO	0.0067	68	6.5	60	10.8	4.1	0.59	52.16	NO	ABSENT	ABSENT	YES	NO
6.05.040.004	ODOREU	NV	RURAL	40	40-60	F	156	104	42.74	PRESENT	ABSENT	YES	NO	NO	0.0087	118	6	50	12	2	0.77	68.07	NO	ABSENT	ABSENT	YES	NO
6.05.040.005	ODOREU	NV	RURAL	25	< 40 ?	F	153	89	38.02	PRESENT	ABSENT	NO	NO	NO	0.0076	62	6.4	32	20	5.3	0.67	59.23	NO	ABSENT	ABSENT	NO	NO
6.05.040.006	ODOREU	NV	RURAL	21	< 40 ?	M	184	92	27.17	ABSENT	PRESENT	NO	YES	NO	0.0086	238	6	102	5.9	5.6	0.76	67.18	NO	ABSENT	ABSENT	NO	NO
6.05.040.007	ODOREU	NV	RURAL	46	40-60	F	157	102	41.38	PRESENT	ABSENT	YES	NO	NO	0.009	131	6.1	140	4.4	8.5	0.8	70.72	NO	ABSENT	ABSENT	NO	NO
6.05.040.008	ODOREU	NV	RURAL	58	40-60	F	161	81	31.25	PRESENT	ABSENT	YES	NO	NO	0.0084	232	6.1	74	8.2	4.6	0.74	65.42	UNKNOWN	ABSENT	ABSENT	NO	NO
6.05.040.009	ODOREU	NV	RURAL	58	40-60	F	155	90	37.46	PRESENT	ABSENT	YES	NO	YES	0.0067	211	9.4	110	8.5	4.8	0.59	52.16	UNKNOWN	ABSENT	ABSENT	YES	NO
6.05.040.010	ODOREU	NV	RURAL	64	>60	F	149	45	20.27	ABSENT	ABSENT	NO	YES	NO	0.0061	140	6.7	49	13.7	3.5	0.54	47.74	NO	ABSENT	ABSENT	NO	NO
6.05.040.011	ODOREU	NV	RURAL	44	40-60	M	158	67	26.84	ABSENT	ABSENT	NO	YES	NO	0.0113	256	6.5	132	4.9	3.8	1	88.4	NO	ABSENT	ABSENT	NO	NO
6.05.040.012	ODOREU	NV	RURAL	35	< 40 ?	M	135	45	24.69	ABSENT	ABSENT	NO	NO	NO	0.008	258	6.2	118	5.3	5.3	0.71	62.76	NO	ABSENT	ABSENT	NO	NO
6.06.001.001	ZALAU	NV	URBAN	52	40-60	F	150	110	48.89	PRESENT	PRESENT	YES	YES	NO	0.0071	101	14	113	12.4	7.8	0.63	55.69	NO	ABSENT	ABSENT	NO	NO
6.06.001.002	ZALAU	NV	URBAN	38	< 40 ?	F	170	63	21.8	ABSENT	ABSENT	YES	NO	NO	0.0068	132	7.3	192	3.8	4.3	0.6	53.04	NO	ABSENT	ABSENT	YES	NO
6.06.001.003	ZALAU	NV	URBAN	66	>60	F	158	106	42.46	PRESENT	ABSENT	YES	NO	NO	0.0064	218	9.3	116	8	5.9	0.57	50.39	NO	ABSENT	ABSENT	YES	NO
6.06.001.004	ZALAU	NV	URBAN	47	40-60	M	183	102	30.46	PRESENT	PRESENT	NO	NO	NO	0.013	192	5.5	159	3.5	5.8	1.15	101.66	NO	ABSENT	ABSENT	YES	NO
6.06.001.005	ZALAU	NV	URBAN	33	< 40 ?	F	153	70.8	30.24	PRESENT	ABSENT	NO	YES	NO	0.007	243	5.9	141	4.2	3.1	0.62	54.81	NO	ABSENT	ABSENT	NO	NO
6.06.001.006	ZALAU	NV	URBAN	67	>60	F	152	80	34.63	PRESENT	ABSENT	NO	NO	NO	0.0071	71	5.5	50	11	4.8	0.63	55.69	NO	ABSENT	ABSENT	NO	NO
6.06.001.007	ZALAU	NV	URBAN	71	>60	M	171	93	31.8	PRESENT	ABSENT	YES	NO	NO	0.0104	240	6.6	63	10.5	4.8	0.92	81.33	YES	ABSENT	PRESENT	NO	NO
6.06.001.008	ZALAU	NV	URBAN	61	>60	F	146	97	45.51	PRESENT	ABSENT	NO	YES	NO	0.0082	196	5.7	110	5.2	5.7	0.73	64.53	NO	ABSENT	ABSENT	UNKNOWN	UNKNOWN
6.06.001.009	ZALAU	NV	URBAN	64	>60	F	154	77	32.47	PRESENT	PRESENT	NO	NO	NO	0.007	180	5	84	6	4.7	0.62	54.81	NO	ABSENT	ABSENT	NO	NO
6.06.001.010	ZALAU	NV	URBAN	59	40-60	F	166	97	35.2	PRESENT	ABSENT	YES	NO	YES	0.0127	112	6.1	38	16.1	6.6	1.12	99.01	YES	ABSENT	PRESENT	NO	NO
6.06.001.011	ZALAU	NV	URBAN	38	< 40 ?	M	165	69	25.34	ABSENT	ABSENT	YES	YES	YES	0.0068	72	6.4	19	33.7	4.1	0.6	53.04	NO	ABSENT	ABSENT	NO	NO
6.06.001.013	ZALAU	NV	URBAN	31	< 40 ?	M	167	56	20.08	ABSENT	ABSENT	NO	YES	NO	0.0078	123	7.3	159	4.6	2.5	0.69	61	NO	ABSENT	ABSENT	NO	NO
6.06.001.014	ZALAU	NV	URBAN	58	40-60	M	166	77	27.94	ABSENT	ABSENT	YES	NO	NO	0.0095	252	5.9	157	3.8	6.4	0.84	74.26	YES	ABSENT	PRESENT	YES	NO
6.06.001.015	ZALAU	NV	URBAN	73	>60	M	175	79	25.8	ABSENT	ABSENT	YES	NO	NO	0.0089	194	9.6	75	12.8	3.4	0.79	69.84	NO	ABSENT	ABSENT	NO	NO
6.06.001.016	ZALAU	NV	URBAN	71	>60	M	165	86	31.59	PRESENT	ABSENT	NO	NO	NO	0.0103	222	6	71	8.5	5.9	0.91	80.44	NO	ABSENT	ABSENT	NO	NO
6.06.001.017	ZALAU	NV	URBAN	80	>60	M	157	71	28.8	ABSENT	ABSENT	YES	NO	NO	0.0096	182	6.2	73	8.5	9.3	0.85	75.14	NO	ABSENT	ABSENT	YES	NO
6.06.055.001	SARMASAG	NV	RURAL	53	40-60	F	166	88	31.93	PRESENT	ABSENT	NO	NO	NO	0.009	198	6.1	148	4.1	6.2	0.8	70.72	NO	ABSENT	ABSENT	NO	NO
6.06.055.002	SARMASAG	NV	RURAL	41	40-60	F	170	63	21.8	ABSENT	ABSENT	NO	NO	NO	0.0082	232	7	293	2.4	3.3	0.73	64.53	NO	ABSENT	ABSENT	YES	NO
6.06.055.003	SARMASAG	NV	RURAL	64	>60	M	166	74	26.85	ABSENT	ABSENT	YES	NO	NO	0.0084	236	6.8	60	11.3	4.5	0.74	65.42	NO	ABSENT	ABSENT	NO	NO
6.06.055.004	SARMASAG	NV	RURAL	27	< 40 ?	M	183	77	22.99	ABSENT	ABSENT	NO	YES	NO	0.009	164	6.2	118	5.3	5.1	0.8	70.72	NO	ABSENT	ABSENT	YES	NO
6.06.055.006	SARMASAG	NV	RURAL	66	>60	F	166	74.5	27.04	ABSENT	ABSENT	YES	NO	NO	0.0089	171	6	75	8	3.8	0.79	69.84	NO	ABSENT	ABSENT	NO	NO
6.06.055.007	SARMASAG	NV	RURAL	23	< 40 ?	F	158	72	28.84	ABSENT	PRESENT	NO	YES	NO	0.0069	192	6.6	167	4	4.7	0.61	53.92	NO	ABSENT	ABSENT	YES	NO
6.06.055.008	SARMASAG	NV	RURAL	28	< 40 ?	M	185	86.5	25.27	ABSENT	ABSENT	NO	YES	NO	0.0099	144	7	206	3.4	4.6	0.88	77.79	NO	ABSENT	ABSENT	NO	NO
6.06.055.009	SARMASAG	NV	RURAL	44	40-60	F	163	66	24.84	ABSENT	ABSENT	NO	YES	NO	0.0073	174	7.7	249	3.1	3.1	0.65	57.46	NO	ABSENT	ABSENT	NO	NO
6.06.055.010	SARMASAG	NV	RURAL	72	>60	M	170	86	29.76	ABSENT	ABSENT	YES	NO	NO	0.011	262	6.1	88	6.9	5.1	0.97	85.75	NO	ABSENT	ABSENT	NO	NO
6.06.055.011	SARMASAG	NV	RURAL	60	>60	M	176	93	30.02	PRESENT	ABSENT	NO	NO	NO	0.0105	201	6.1	60	10.2	4.9	0.93	82.21	NO	ABSENT	ABSENT	NO	NO
6.06.055.012	SARMASAG	NV	RURAL	24	< 40 ?	F	154	117	49.33	PRESENT	PRESENT	NO	YES	NO	0.0085	218	102.5	270	38	4	0.75	66.3	NO	ABSENT	ABSENT	NO	NO
6.06.055.013	SARMASAG	NV	RURAL	58	40-60	F	150	72	32	PRESENT	ABSENT	YES	NO	NO	0.0082	156	5.7	83	6.9	4.7	0.73	64.53	NO	ABSENT	ABSENT	YES	NO
6.06.055.014	SARMASAG	NV	RURAL	50	40-60	M	171	99	33.86	PRESENT	ABSENT	NO	NO	YES	0.0106	313	6.4	83	7.7	5	0.94	83.1	.	ABSENT	ABSENT	YES	NO
6.06.055.015	SARMASAG	NV	RURAL	25	< 40 ?	F	160	59.5	23.24	ABSENT	ABSENT	NO	NO	YES	0.0069	143	8.3	143	5.8	3.5	0.61	53.92	NO	ABSENT	ABSENT	NO	NO
6.06.055.016	SARMASAG	NV	RURAL	41	40-60	M	163	79	29.73	ABSENT	PRESENT	YES	NO	NO	0.0085	143	12.6	121	10.4	3.8	0.75	66.3	NO	ABSENT	ABSENT	NO	NO
6.06.055.017	SARMASAG	NV	RURAL	45	40-60	M	175	84	27.43	ABSENT	ABSENT	YES	NO	NO	0.0128	179	6	174	3.4	5.6	1.13	99.89	NO	ABSENT	ABSENT	NO	NO
7.01.001.001	ALBA IULIA	CENTRU	URBAN	43	40-60	F	173	82	27.4	ABSENT	ABSENT	NO	NO	NO	0.0096	132	9.9	95	10.4	2.9	0.85	75.14	NO	ABSENT	ABSENT	NO	NO	0.78
7.01.001.002	ALBA IULIA	CENTRU	URBAN	41	40-60	M	193	129.5	34.77	PRESENT	ABSENT	YES	NO	NO	0.014	148	1.4	159	0.9	6.6	1.24	109.62	NO	ABSENT	ABSENT	NO	NO	0.69
7.01.001.003	ALBA IULIA	CENTRU	URBAN	25	< 40 ?	M	175	76	24.82	ABSENT	ABSENT	NO	YES	NO	0.0102	141	7.6	216	3.5	4.9	0.9	79.56	NO	.	ABSENT	.	0	0.49
7.01.001.005	ALBA IULIA	CENTRU	URBAN	26	< 40 ?	F	171	59.8	20.45	ABSENT	ABSENT	NO	YES	NO	0.006	113	5.8	124	4.7	3.1	0.53	46.85	NO	ABSENT	ABSENT	NO	NO	0.46
7.01.001.006	ALBA IULIA	CENTRU	URBAN	26	< 40 ?	F	161	46.8	18.05	ABSENT	ABSENT	NO	YES	NO	0.0079	50	2.1	138	1.5	3.2	0.7	61.88	NO	ABSENT	ABSENT	NO	NO	0.45
7.01.001.007	ALBA IULIA	CENTRU	URBAN	67	>60	M	176	82.5	26.63	ABSENT	ABSENT	NO	NO	NO	0.0179	198	1.3	164	0.8	5.7	1.58	139.67	NO	ABSENT	ABSENT	NO	NO	0.74
7.01.001.008	ALBA IULIA	CENTRU	URBAN	63	>60	F	157	84.9	34.44	PRESENT	ABSENT	YES	YES	NO	0.0104	94	0.9	55	1.6	5.6	0.92	81.33	NO	ABSENT	ABSENT	NO	NO	0.7
7.01.001.009	ALBA IULIA	CENTRU	URBAN	49	40-60	F	165	70	25.71	ABSENT	ABSENT	YES	NO	NO	0.0081	123	1	83	1.2	4.7	0.72	63.65	NO	ABSENT	ABSENT	NO	NO	0.57
7.01.001.010	ALBA IULIA	CENTRU	URBAN	53	40-60	M	175	73.6	24.03	ABSENT	ABSENT	YES	NO	NO	0.0105	20	0.9	32	2.8	6.5	0.93	82.21	NO	ABSENT	ABSENT	YES	NO
7.01.001.011	ALBA IULIA	CENTRU	URBAN	27	< 40 ?	F	176	82.7	26.7	ABSENT	ABSENT	NO	NO	YES	0.008	83	2.3	159	1.4	4.8	0.71	62.76	NO	.	ABSENT	.	0	0.46
7.01.001.012	ALBA IULIA	CENTRU	URBAN	77	>60	M	175	76.8	25.08	ABSENT	ABSENT	NO	YES	YES	0.0092	195	4.4	106	4.2	4.9	0.81	71.6	NO	ABSENT	ABSENT	NO	NO	0.65
7.01.001.013	ALBA IULIA	CENTRU	URBAN	79	>60	F	148	62.5	28.53	ABSENT	ABSENT	YES	NO	YES	0.0067	94	3	83	3.6	4.1	0.59	52.16	.	ABSENT	ABSENT	NO	NO
7.01.001.014	ALBA IULIA	CENTRU	URBAN	47	40-60	M	181	109.9	33.55	PRESENT	ABSENT	YES	NO	NO	0.0116	222	4.8	188	2.6	6.1	1.03	91.05	NO	ABSENT	ABSENT	NO	NO	0.64
7.01.001.015	ALBA IULIA	CENTRU	URBAN	58	40-60	M	164	101.6	37.78	PRESENT	ABSENT	NO	NO	YES	0.0099	199	2.6	125	2.1	6.2	0.88	77.79	NO	.	ABSENT	.	0	0.75
7.01.001.016	ALBA IULIA	CENTRU	URBAN	53	40-60	F	148	48.4	22.1	ABSENT	ABSENT	YES	NO	NO	0.0064	116	1	39	2.6	2.7	0.57	50.39	NO	ABSENT	ABSENT	NO	NO	0.48
7.01.001.017	ALBA IULIA	CENTRU	URBAN	35	< 40 ?	M	177	81.7	26.08	ABSENT	ABSENT	NO	YES	YES	0.0099	120	1.6	219	0.7	6.6	0.88	77.79	.	ABSENT	ABSENT	NO	NO	0.49
7.01.001.018	ALBA IULIA	CENTRU	URBAN	51	40-60	F	159	88.6	35.05	PRESENT	ABSENT	YES	NO	YES	0.008	73	2.2	132	1.7	5.3	0.71	62.76	NO	ABSENT	ABSENT	NO	NO	0.49
7.01.001.019	ALBA IULIA	CENTRU	URBAN	23	< 40 ?	M	182	69	20.83	ABSENT	PRESENT	YES	YES	NO	0.0082	194	6.4	216	3	4.7	0.73	64.53	NO	ABSENT	ABSENT	NO	NO	0.45
7.01.001.020	ALBA IULIA	CENTRU	URBAN	30	< 40 ?	M	169	67.2	23.53	ABSENT	ABSENT	YES	YES	NO	0.0095	65	1.3	72	1.8	6	0.84	74.26	NO	ABSENT	ABSENT	NO	NO	0.46
7.01.001.021	ALBA IULIA	CENTRU	URBAN	53	40-60	F	168	61	21.61	ABSENT	ABSENT	NO	YES	NO	0.0076	65	2.8	85	3.3	3.4	0.67	59.23	NO	ABSENT	ABSENT	NO	NO	0.46
7.01.001.022	ALBA IULIA	CENTRU	URBAN	54	40-60	F	148	60	27.39	ABSENT	ABSENT	NO	NO	NO	0.0075	151	12.5	138	9.1	4.6	0.66	58.34	.	ABSENT	ABSENT	NO	NO	0.57
7.01.001.023	ALBA IULIA	CENTRU	URBAN	59	40-60	M	179	108.5	33.86	PRESENT	ABSENT	YES	NO	NO	0.0098	153	8.7	124	7	5.7	0.87	76.91	NO	.	ABSENT	.	0	0.67
7.01.001.024	ALBA IULIA	CENTRU	URBAN	54	40-60	F	156	78.6	32.3	PRESENT	PRESENT	YES	NO	NO	0.0075	80	2.2	147	1.5	5.6	0.66	58.34	NO	ABSENT	ABSENT	NO	NO	0.84
7.01.001.025	ALBA IULIA	CENTRU	URBAN	41	40-60	F	170	69.7	24.12	ABSENT	ABSENT	YES	YES	NO	0.0085	198	2.3	149	1.5	2.8	0.75	66.3	NO	.	ABSENT	.	0	0.57
7.01.039.002	IGHIU	CENTRU	RURAL	58	40-60	F	162	80.4	30.64	PRESENT	PRESENT	NO	YES	YES	0.0105	139	16.8	135	12.4	4.6	0.93	82.21	NO	ABSENT	ABSENT	NO	NO	0.51
7.01.039.003	IGHIU	CENTRU	RURAL	64	>60	M	175	83.5	27.27	ABSENT	ABSENT	YES	NO	NO	0.008	198	2.6	130	2	6.7	0.71	62.76	NO	ABSENT	ABSENT	NO	NO	0.72
7.01.039.005	IGHIU	CENTRU	RURAL	47	40-60	F	153	96.5	41.22	PRESENT	PRESENT	YES	NO	YES	0.0067	91	9	69	13	4.3	0.59	52.16	NO	ABSENT	ABSENT	NO	NO
7.01.039.006	IGHIU	CENTRU	RURAL	30	< 40 ?	M	168	62	21.97	ABSENT	PRESENT	NO	YES	NO	0.0099	104	1.8	101	1.8	4.7	0.88	77.79	NO	.	ABSENT	.	0	0.44
7.01.039.007	IGHIU	CENTRU	RURAL	20	< 40 ?	F	161	53.9	20.79	ABSENT	PRESENT	NO	YES	NO	0.0072	45	22.7	184	12.3	4	0.64	56.58	NO	.	ABSENT	.	0	0.44
7.01.039.008	IGHIU	CENTRU	RURAL	78	>60	M	164	89.7	33.35	PRESENT	ABSENT	NO	YES	NO	0.0082	124	22.6	140	16.1	3.6	0.73	64.53	.	ABSENT	ABSENT	NO	NO	0.97
7.01.039.009	IGHIU	CENTRU	RURAL	77	>60	M	166	77.4	28.09	ABSENT	ABSENT	YES	NO	NO	0.0064	121	33	166	19.9	7.7	0.57	50.39	NO	ABSENT	ABSENT	NO	NO	1.03
7.01.039.010	IGHIU	CENTRU	RURAL	64	>60	M	180	111.5	34.41	PRESENT	ABSENT	NO	NO	NO	0.0077	182	12.7	105	12.1	4.8	0.68	60.11	.	.	ABSENT	.	0	0.94
7.01.039.011	IGHIU	CENTRU	RURAL	63	>60	F	164	85.6	31.83	PRESENT	ABSENT	NO	NO	NO	0.0055	183	1.6	93	1.7	3.4	0.49	43.32	.	ABSENT	ABSENT	NO	NO	0.61
7.01.039.012	IGHIU	CENTRU	RURAL	55	40-60	F	152	96.2	41.64	PRESENT	ABSENT	YES	NO	NO	0.0078	113	5.9	140	4.2	5	0.69	61	NO	.	ABSENT	.	0	0.6
7.01.039.013	IGHIU	CENTRU	RURAL	32	< 40 ?	F	168	55.6	19.7	ABSENT	ABSENT	NO	YES	YES	0.0069	82	4.3	154	2.8	3.3	0.61	53.92	NO	.	ABSENT	.	0	0.41
7.01.039.014	IGHIU	CENTRU	RURAL	35	< 40 ?	M	186	116.1	33.56	PRESENT	ABSENT	YES	NO	NO	0.0116	103	1.4	125	1.1	6.3	1.03	91.05	.	ABSENT	ABSENT	NO	NO	0.61
7.01.039.015	IGHIU	CENTRU	RURAL	34	< 40 ?	F	167	63	22.59	ABSENT	PRESENT	NO	YES	NO	0.0073	168	6.8	176	3.9	4.2	0.65	57.46	NO	ABSENT	ABSENT	NO	NO	0.48
7.01.039.016	IGHIU	CENTRU	RURAL	34	< 40 ?	F	159	53.6	21.2	ABSENT	ABSENT	NO	YES	NO	0.0075	106	3.8	168	2.3	3.7	0.66	58.34	NO	ABSENT	ABSENT	NO	NO	0.6
7.01.039.017	IGHIU	CENTRU	RURAL	52	40-60	M	173	85.8	28.67	ABSENT	ABSENT	YES	NO	NO	0.0081	108	0.8	92	0.9	5.5	0.72	63.65	NO	ABSENT	ABSENT	NO	NO
7.01.039.018	IGHIU	CENTRU	RURAL	47	40-60	M	169	85	29.76	ABSENT	PRESENT	YES	NO	NO	0.0095	98	9.6	309	3.1	6.9	0.84	74.26	NO	ABSENT	ABSENT	NO	NO	0.58
7.02.001.001	BRASOV	CENTRU	URBAN	79	>60	F	146	62.2	29.18	ABSENT	ABSENT	NO	NO	NO	0.0086	127	2.1	76	2.8	3.5	0.76	67.18	NO	ABSENT	ABSENT	NO	NO
7.02.001.002	BRASOV	CENTRU	URBAN	40	40-60	M	179.5	89.1	27.65	ABSENT	ABSENT	NO	NO	NO	0.0101	235	1.4	52	2.7	5.7	0.89	78.68	NO	ABSENT	ABSENT	YES	NO	0.46
7.02.001.003	BRASOV	CENTRU	URBAN	45	40-60	M	180	75	23.15	ABSENT	ABSENT	NO	NO	NO	0.0085	310	1.6	157	1	4.7	0.75	66.3	NO	ABSENT	ABSENT	NO	NO	0.71
7.02.001.004	BRASOV	CENTRU	URBAN	63	>60	F	158	65.8	26.36	ABSENT	ABSENT	YES	NO	YES	0.0057	159	1.8	52	3.5	6.1	0.5	44.2	YES	ABSENT	PRESENT	NO	NO	0.78
7.02.001.005	BRASOV	CENTRU	URBAN	63	>60	M	172	72.2	24.41	ABSENT	ABSENT	YES	NO	NO	0.012	243	28.2	103	27.4	6	1.06	93.7	NO	.	ABSENT	.	0	0.76
7.02.001.006	BRASOV	CENTRU	URBAN	58	40-60	F	164	83.2	30.93	PRESENT	ABSENT	NO	YES	NO	0.0078	126	1.5	40	3.8	5.8	0.69	61	.	ABSENT	ABSENT	YES	NO	0.79
7.02.001.007	BRASOV	CENTRU	URBAN	59	40-60	M	177	98.4	31.41	PRESENT	ABSENT	YES	NO	NO	0.0081	248	1.1	124	0.9	4.3	0.72	63.65	.	ABSENT	ABSENT	NO	NO	0.67
7.02.001.008	BRASOV	CENTRU	URBAN	27	< 40 ?	F	167	79	28.33	ABSENT	ABSENT	NO	YES	NO	0.0066	166	9.5	218	4.4	4.8	0.58	51.27	NO	ABSENT	ABSENT	NO	NO	0.55
7.02.001.009	BRASOV	CENTRU	URBAN	44	40-60	F	154	54.4	22.94	ABSENT	PRESENT	NO	YES	NO	0.0075	137	9.8	170	5.8	4.7	0.66	58.34	NO	ABSENT	ABSENT	NO	NO	0.44
7.02.001.010	BRASOV	CENTRU	URBAN	51	40-60	M	185	90.7	26.5	ABSENT	PRESENT	NO	YES	NO	0.0089	164	1.2	109	1.1	6.2	0.79	69.84	NO	ABSENT	ABSENT	YES	NO	0.85
7.02.001.011	BRASOV	CENTRU	URBAN	60	>60	F	149	52	23.42	ABSENT	ABSENT	NO	NO	NO	0.0072	78	1.1	62	1.8	5	0.64	56.58	NO	ABSENT	ABSENT	YES	NO	0.66
7.02.001.012	BRASOV	CENTRU	URBAN	63	>60	M	172	88.3	29.85	ABSENT	PRESENT	NO	NO	NO	0.0105	99	2.4	83	2.9	7.6	0.93	82.21	NO	ABSENT	ABSENT	NO	NO	0.74
7.02.001.013	BRASOV	CENTRU	URBAN	71	>60	F	157	80	32.46	PRESENT	ABSENT	NO	YES	NO	0.0082	71	1.2	28	4.3	5.3	0.73	64.53	YES	ABSENT	PRESENT	NO	NO	1.05
7.02.001.014	BRASOV	CENTRU	URBAN	75	>60	F	159	62.8	24.84	ABSENT	ABSENT	NO	NO	NO	0.0099	161	1	74	1.4	3.9	0.88	77.79	NO	ABSENT	ABSENT	NO	NO	0.84
7.02.001.015	BRASOV	CENTRU	URBAN	65	>60	M	182	78	23.55	ABSENT	ABSENT	YES	NO	NO	0.0084	275	4.6	189	2.4	5	0.74	65.42	NO	ABSENT	ABSENT	YES	NO	0.87
7.02.001.016	BRASOV	CENTRU	URBAN	69	>60	M	174	110	36.33	PRESENT	ABSENT	YES	NO	NO	0.0125	201	1.8	66	2.7	6.7	1.11	98.12	NO	ABSENT	ABSENT	NO	NO	0.75
7.02.001.017	BRASOV	CENTRU	URBAN	46	40-60	M	170	74.7	25.85	ABSENT	ABSENT	NO	YES	NO	0.0079	140	0.8	129	0.6	3.3	0.7	61.88	NO	ABSENT	ABSENT	NO	NO	0.71
7.02.001.018	BRASOV	CENTRU	URBAN	58	40-60	F	165	66.1	24.28	ABSENT	ABSENT	NO	YES	NO	0.0125	54	64	24	266.7	7.3	1.11	98.12	NO	ABSENT	ABSENT	NO	NO	0.78
7.02.001.019	BRASOV	CENTRU	URBAN	45	40-60	F	161	78.5	30.28	PRESENT	PRESENT	NO	YES	NO	0.0075	80	144	137	105.1	5.1	0.66	58.34	NO	ABSENT	ABSENT	YES	NO	0.59
7.02.001.020	BRASOV	CENTRU	URBAN	39	< 40 ?	F	162	62	23.62	ABSENT	ABSENT	NO	YES	NO	0.007	169	1.6	88	1.8	2.7	0.62	54.81	.	ABSENT	ABSENT	NO	NO	0.44
7.02.001.021	BRASOV	CENTRU	URBAN	44	40-60	F	167	84	30.12	PRESENT	ABSENT	NO	YES	NO	0.0068	203	2	169	1.2	4.4	0.6	53.04	NO	ABSENT	ABSENT	NO	NO	0.75
7.02.001.022	BRASOV	CENTRU	URBAN	74	>60	M	178	91.9	29.01	ABSENT	ABSENT	YES	YES	YES	0.015	102	6.7	51	13.1	5.8	1.33	117.57	YES	ABSENT	PRESENT	NO	NO	0.73
7.02.001.023	BRASOV	CENTRU	URBAN	20	< 40 ?	M	175	59.8	19.53	ABSENT	ABSENT	NO	YES	NO	0.0101	56	8.4	192	4.4	4.7	0.89	78.68	NO	ABSENT	ABSENT	YES	NO	0.5
7.02.001.024	BRASOV	CENTRU	URBAN	20	< 40 ?	F	164	73.3	27.25	ABSENT	PRESENT	NO	YES	NO	0.0088	114	7.2	231	3.1	5.6	0.78	68.95	NO	ABSENT	ABSENT	NO	NO	0.55
7.02.001.025	BRASOV	CENTRU	URBAN	21	< 40 ?	F	168	56.9	20.16	ABSENT	ABSENT	YES	YES	NO	0.0076	59	13.1	234	5.6	4.4	0.67	59.23	NO	ABSENT	ABSENT	YES	NO	0.64
7.02.001.027	BRASOV	CENTRU	URBAN	37	< 40 ?	F	166	52	18.87	ABSENT	ABSENT	NO	YES	NO	0.0057	245	7.5	80	9.4	3.2	0.5	44.2	NO	ABSENT	ABSENT	NO	NO	0.72
7.02.001.028	BRASOV	CENTRU	URBAN	41	40-60	F	163	61.3	23.07	ABSENT	ABSENT	NO	YES	NO	0.0063	50	1.3	87	1.5	3.7	0.56	49.5	NO	ABSENT	ABSENT	NO	NO	0.63
7.02.001.030	BRASOV	CENTRU	URBAN	69	>60	F	146	66.7	31.29	PRESENT	ABSENT	YES	NO	NO	0.0084	136	5.8	38	15.3	5.6	0.74	65.42	NO	.	ABSENT	.	0	0.81
7.02.001.031	BRASOV	CENTRU	URBAN	28	< 40 ?	F	162	54	20.58	ABSENT	ABSENT	NO	YES	NO	0.0068	220	6.2	117	5.3	4.8	0.6	53.04	.	ABSENT	ABSENT	NO	NO	0.52
7.02.001.032	BRASOV	CENTRU	URBAN	30	< 40 ?	M	167	61.8	22.16	ABSENT	ABSENT	YES	YES	NO	0.012	179	10.1	189	5.3	5.8	1.06	93.7	NO	ABSENT	ABSENT	NO	NO	0.57
7.02.001.033	BRASOV	CENTRU	URBAN	45	40-60	F	167	74.5	26.71	ABSENT	PRESENT	NO	YES	YES	0.0067	89	0.4	139	0.3	4.4	0.59	52.16	NO	ABSENT	ABSENT	NO	NO	0.83
7.02.001.034	BRASOV	CENTRU	URBAN	67	>60	F	166	104.5	37.92	PRESENT	ABSENT	YES	NO	NO	0.0069	84	0.9	54	1.7	6.4	0.61	53.92	NO	ABSENT	ABSENT	NO	NO	0.63
7.02.001.035	BRASOV	CENTRU	URBAN	30	< 40 ?	F	153	58	24.78	ABSENT	PRESENT	NO	YES	NO	0.0073	66	16.2	202	8	3.4	0.65	57.46	NO	ABSENT	ABSENT	NO	NO	0.53
7.02.001.036	BRASOV	CENTRU	URBAN	20	< 40 ?	F	153	47.3	20.21	ABSENT	ABSENT	NO	YES	NO	0.0064	88	20.4	185	11	4.6	0.57	50.39	NO	ABSENT	ABSENT	NO	NO	0.45
7.02.050.001	TARLUNGENI	CENTRU	RURAL	66	>60	F	149	73.9	33.29	PRESENT	PRESENT	NO	YES	NO	0.0079	175	5.6	122	4.6	5.2	0.7	61.88	NO	ABSENT	ABSENT	NO	NO	0.64
7.02.050.002	TARLUNGENI	CENTRU	RURAL	21	< 40 ?	F	163	66.8	25.14	ABSENT	ABSENT	NO	YES	YES	0.0052	166	6	90	6.7	3	0.46	40.66	NO	ABSENT	ABSENT	NO	NO	0.46
7.02.050.003	TARLUNGENI	CENTRU	RURAL	34	< 40 ?	M	173	57.9	19.35	ABSENT	ABSENT	NO	YES	NO	0.0079	200	5.7	139	4.1	5.5	0.7	61.88	NO	ABSENT	ABSENT	NO	NO	0.5
7.02.050.004	TARLUNGENI	CENTRU	RURAL	56	40-60	F	164	100.6	37.4	PRESENT	ABSENT	YES	YES	NO	0.008	112	8	97	8.2	7.4	0.71	62.76	.	ABSENT	ABSENT	NO	NO	0.68
7.02.050.005	TARLUNGENI	CENTRU	RURAL	70	>60	F	160	73.6	28.75	ABSENT	ABSENT	NO	YES	NO	0.0079	105	5.8	74	7.8	4.7	0.7	61.88	NO	ABSENT	ABSENT	YES	NO	0.72
7.02.050.006	TARLUNGENI	CENTRU	RURAL	34	< 40 ?	F	157	60	24.34	ABSENT	ABSENT	NO	YES	NO	0.0086	76	6.1	94	6.5	4.5	0.76	67.18	NO	ABSENT	ABSENT	YES	NO	0.6
7.02.050.007	TARLUNGENI	CENTRU	RURAL	69	>60	M	183	112	33.44	PRESENT	ABSENT	NO	NO	NO	0.0132	121	0.8	72	1.1	5.5	1.17	103.43	NO	ABSENT	ABSENT	YES	NO	1.18
7.02.050.008	TARLUNGENI	CENTRU	RURAL	60	>60	F	150	51.7	22.98	ABSENT	PRESENT	YES	YES	NO	0.007	84	5.5	85	6.5	3.8	0.62	54.81	NO	ABSENT	ABSENT	YES	NO	0.47
7.02.050.009	TARLUNGENI	CENTRU	RURAL	63	>60	M	163	60	22.58	ABSENT	PRESENT	YES	NO	NO	0.0094	151	11.6	242	4.8	5.9	0.83	73.37	NO	ABSENT	ABSENT	YES	NO	0.73
7.02.050.010	TARLUNGENI	CENTRU	RURAL	43	40-60	F	170	50	17.3	ABSENT	PRESENT	NO	YES	NO	0.007	147	8	86	9.3	3.1	0.62	54.81	NO	ABSENT	ABSENT	NO	NO	0.71
7.02.050.011	TARLUNGENI	CENTRU	RURAL	54	40-60	F	159	82.8	32.75	PRESENT	ABSENT	NO	YES	NO	0.0071	101	7.2	26	27.7	5.2	0.63	55.69	NO	ABSENT	ABSENT	NO	NO	0.59
7.02.050.012	TARLUNGENI	CENTRU	RURAL	43	40-60	F	155	72.4	30.14	PRESENT	PRESENT	NO	YES	NO	0.0073	300	5.4	52	10.4	4.3	0.65	57.46	NO	ABSENT	ABSENT	YES	NO	0.73
7.02.050.013	TARLUNGENI	CENTRU	RURAL	44	40-60	M	172	98.5	33.3	PRESENT	ABSENT	YES	NO	YES	0.0098	166	12.5	197	6.3	6.8	0.87	76.91	NO	ABSENT	ABSENT	NO	NO
7.02.050.014	TARLUNGENI	CENTRU	RURAL	34	< 40 ?	M	161	62.3	24.03	ABSENT	PRESENT	NO	YES	NO	0.0077	174	5.5	130	4.2	4.3	0.68	60.11	NO	ABSENT	ABSENT	UNKNOWN	NO	0.55
7.02.050.015	TARLUNGENI	CENTRU	RURAL	49	40-60	F	155	56.6	23.56	ABSENT	PRESENT	NO	NO	NO	0.0068	269	7.6	170	4.5	3.2	0.6	53.04	NO	ABSENT	ABSENT	NO	NO	0.71
7.02.050.016	TARLUNGENI	CENTRU	RURAL	40	40-60	F	160	91	35.55	PRESENT	ABSENT	YES	YES	NO	0.0068	67	5.6	87	6.4	5.7	0.6	53.04	NO	ABSENT	ABSENT	NO	NO	0.48
7.02.050.017	TARLUNGENI	CENTRU	RURAL	55	40-60	F	158	58.8	23.55	ABSENT	ABSENT	NO	YES	YES	0.0103	215	1.4	94	1.5	5.2	0.91	80.44	NO	ABSENT	ABSENT	NO	NO	0.6
7.02.050.018	TARLUNGENI	CENTRU	RURAL	56	40-60	M	169	77.9	27.27	ABSENT	ABSENT	YES	NO	NO	0.0063	243	3.8	186	2	4	0.56	49.5	NO	ABSENT	ABSENT	YES	NO	0.62
7.02.050.019	TARLUNGENI	CENTRU	RURAL	21	< 40 ?	M	177	77.9	24.87	ABSENT	PRESENT	NO	YES	NO	0.0089	149	5.9	167	3.5	7.1	0.79	69.84	NO	ABSENT	ABSENT	NO	NO	0.62
7.02.050.020	TARLUNGENI	CENTRU	RURAL	41	40-60	M	173	139	46.44	PRESENT	ABSENT	NO	NO	NO	0.0124	118	214.7	75	286.3	8.3	1.1	97.24	NO	ABSENT	ABSENT	NO	NO	0.58
7.02.050.021	TARLUNGENI	CENTRU	RURAL	46	40-60	M	192	80.5	21.84	ABSENT	PRESENT	YES	NO	NO	0.0084	218	5.4	122	4.4	4.5	0.74	65.42	NO	ABSENT	ABSENT	NO	NO	0.81
7.02.050.022	TARLUNGENI	CENTRU	RURAL	46	40-60	F	135	56.4	30.95	PRESENT	ABSENT	YES	NO	NO	0.0062	217	13.3	110	12.1	4.9	0.55	48.62	NO	ABSENT	ABSENT	NO	NO	0.61
7.02.050.023	TARLUNGENI	CENTRU	RURAL	34	< 40 ?	F	154	87.5	36.89	PRESENT	ABSENT	NO	NO	NO	0.0095	36	5.6	99	5.7	6.2	0.84	74.26	NO	ABSENT	ABSENT	NO	NO	0.49
7.02.050.024	TARLUNGENI	CENTRU	RURAL	36	< 40 ?	M	192	92	24.96	ABSENT	ABSENT	NO	NO	NO	0.0097	232	5.3	165	3.2	5.5	0.86	76.02	NO	ABSENT	ABSENT	NO	NO	0.66
7.02.050.025	TARLUNGENI	CENTRU	RURAL	61	>60	F	166	99.8	36.22	PRESENT	ABSENT	YES	NO	NO	0.0067	100	5.9	54	10.9	4.4	0.59	52.16	NO	ABSENT	ABSENT	YES	NO	0.62
7.02.050.026	TARLUNGENI	CENTRU	RURAL	43	40-60	M	181	123.2	37.61	PRESENT	ABSENT	YES	NO	NO	0.009	97	7.1	147	4.8	7.3	0.8	70.72	NO	ABSENT	ABSENT	NO	NO	0.59
7.02.050.027	TARLUNGENI	CENTRU	RURAL	20	< 40 ?	F	151	54.3	23.81	ABSENT	ABSENT	NO	YES	NO	0.0064	176	5.3	88	6	4.2	0.57	50.39	NO	ABSENT	ABSENT	YES	NO	0.48
7.02.050.028	TARLUNGENI	CENTRU	RURAL	27	< 40 ?	F	155	51.9	21.6	ABSENT	ABSENT	NO	YES	NO	0.0034	129	38.6	126	30.6	5	0.3	26.52	NO	ABSENT	ABSENT	NO	NO	0.58
7.03.003.001	COVASNA	CENTRU	URBAN	45	40-60	F	164	66.6	24.76	ABSENT	ABSENT	NO	YES	NO	0.0088	121	5.4	86	6.3	4.2	0.78	68.95	NO	ABSENT	ABSENT	NO	NO
7.03.003.002	COVASNA	CENTRU	URBAN	54	40-60	M	180	100	30.86	PRESENT	PRESENT	YES	NO	NO	0.0106	206	7	162	4.3	4.9	0.94	83.1	NO	.	ABSENT	.	0
7.03.003.003	COVASNA	CENTRU	URBAN	74	>60	M	179	73.1	22.81	ABSENT	ABSENT	YES	NO	YES	0.0111	170	5.4	199	2.7	5.1	0.98	86.63	NO	ABSENT	ABSENT	YES	NO
7.03.003.004	COVASNA	CENTRU	URBAN	67	>60	F	161	84	32.41	PRESENT	ABSENT	YES	NO	NO	0.0081	149	5.7	80	7.1	4.9	0.72	63.65	NO	ABSENT	ABSENT	NO	NO
7.03.003.005	COVASNA	CENTRU	URBAN	47	40-60	M	180	91	28.09	ABSENT	PRESENT	YES	NO	NO	0.0099	188	6.6	197	3.4	4.8	0.88	77.79	NO	ABSENT	ABSENT	YES	NO
7.03.003.006	COVASNA	CENTRU	URBAN	57	40-60	F	162	93	35.44	PRESENT	ABSENT	YES	NO	NO	0.0082	248	5.1	115	4.4	5	0.73	64.53	NO	ABSENT	ABSENT	NO	YES
7.03.003.007	COVASNA	CENTRU	URBAN	36	< 40 ?	F	162	68	25.91	ABSENT	PRESENT	YES	NO	NO	0.0158	88	6.8	106	6.4	7.1	1.4	123.76	YES	ABSENT	PRESENT	NO	NO
7.03.003.008	COVASNA	CENTRU	URBAN	67	>60	M	174	116	38.31	PRESENT	ABSENT	YES	NO	NO	0.0098	171	234.3	77	304.3	7.2	0.87	76.91	NO	ABSENT	PRESENT	NO	NO
7.03.003.009	COVASNA	CENTRU	URBAN	40	40-60	M	168	80.8	28.63	ABSENT	ABSENT	NO	NO	NO	0.0087	238	5	139	3.6	5.2	0.77	68.07	.	.	ABSENT	.	.
7.03.003.010	COVASNA	CENTRU	URBAN	24	< 40 ?	F	166	71.5	25.95	ABSENT	ABSENT	NO	YES	NO	0.0081	105	9.3	389	2.4	4.2	0.72	63.65	NO	ABSENT	ABSENT	YES	NO
7.03.003.011	COVASNA	CENTRU	URBAN	56	40-60	F	154	57	24.03	ABSENT	ABSENT	NO	NO	NO	0.007	191	6	82	7.3	4.9	0.62	54.81	NO	ABSENT	ABSENT	YES	NO
7.03.003.012	COVASNA	CENTRU	URBAN	30	< 40 ?	F	161	56.5	21.8	ABSENT	ABSENT	NO	YES	NO	0.0099	200	11.4	129	8.8	5.1	0.88	77.79	NO	ABSENT	ABSENT	NO	NO
7.03.003.013	COVASNA	CENTRU	URBAN	58	40-60	M	176	94.6	30.54	PRESENT	PRESENT	NO	NO	YES	0.0092	296	5.8	84	6.9	5.5	0.81	71.6	NO	ABSENT	ABSENT	YES	NO
7.03.003.014	COVASNA	CENTRU	URBAN	30	< 40 ?	M	175	78	25.47	ABSENT	ABSENT	NO	YES	NO	0.0097	268	5.4	146	3.7	5	0.86	76.02	NO	ABSENT	ABSENT	YES	NO
7.03.003.015	COVASNA	CENTRU	URBAN	50	40-60	F	164	68.4	25.43	ABSENT	PRESENT	NO	YES	NO	0.005	146	6.9	92	7.5	4.2	0.44	38.9	NO	ABSENT	ABSENT	YES	NO
7.03.003.016	COVASNA	CENTRU	URBAN	80	>60	F	157	73	29.62	ABSENT	PRESENT	YES	YES	NO	0.0082	120	10.9	194	5.6	3.5	0.73	64.53	NO	ABSENT	ABSENT	NO	NO
7.03.003.017	COVASNA	CENTRU	URBAN	73	>60	F	163	64	24.09	ABSENT	ABSENT	NO	YES	NO	0.007	125	5.7	47	12.1	3.5	0.62	54.81	NO	ABSENT	ABSENT	NO	NO
7.03.003.018	COVASNA	CENTRU	URBAN	79	>60	F	155	61	25.39	ABSENT	PRESENT	NO	YES	NO	0.0076	141	4.7	45	10.4	7	0.67	59.23	NO	ABSENT	ABSENT	YES	NO
7.03.003.019	COVASNA	CENTRU	URBAN	20	< 40 ?	M	178	81.5	25.72	ABSENT	ABSENT	NO	YES	NO	0.0089	143	5.6	202	2.8	5.4	0.79	69.84	NO	ABSENT	ABSENT	NO	NO
7.03.045.001	ZAGON	CENTRU	RURAL	50	40-60	F	156	75	30.82	PRESENT	PRESENT	NO	NO	NO	0.0088	73	28.2	40	70.5	4.6	0.78	68.95	NO	ABSENT	ABSENT	YES	NO
7.03.045.002	ZAGON	CENTRU	RURAL	51	40-60	M	179	114	35.58	PRESENT	ABSENT	YES	NO	NO	0.0102	201	5.3	46	11.5	6.6	0.9	79.56	NO	ABSENT	ABSENT	NO	NO
7.03.045.003	ZAGON	CENTRU	RURAL	51	40-60	F	165	89	32.69	PRESENT	ABSENT	YES	NO	YES	0.0095	93	5.6	182	3.1	5.5	0.84	74.26	NO	ABSENT	ABSENT	NO	NO
7.03.045.004	ZAGON	CENTRU	RURAL	39	< 40 ?	F	181	80.8	24.66	ABSENT	ABSENT	NO	NO	NO	0.0073	184	24.3	228	10.7	4.2	0.65	57.46	NO	.	ABSENT	.	0
7.03.045.005	ZAGON	CENTRU	RURAL	41	40-60	M	183	119.3	35.62	PRESENT	ABSENT	YES	NO	YES	0.0089	149	7.3	217	3.4	5.4	0.79	69.84	NO	ABSENT	ABSENT	NO	NO	0.57
7.03.045.006	ZAGON	CENTRU	RURAL	74	>60	F	155	51	21.23	ABSENT	ABSENT	YES	NO	NO	0.0094	110	8.7	143	6.1	4.1	0.83	73.37	NO	ABSENT	ABSENT	YES	NO	0.92
7.03.045.007	ZAGON	CENTRU	RURAL	59	40-60	M	170	80.9	27.99	ABSENT	ABSENT	YES	NO	NO	0.0133	136	5.6	122	4.6	6.9	1.18	104.31	NO	ABSENT	ABSENT	NO	NO	0.96
7.03.045.008	ZAGON	CENTRU	RURAL	62	>60	F	158	91	36.45	PRESENT	ABSENT	NO	NO	NO	0.0097	132	5.6	68	8.2	5.3	0.86	76.02	NO	ABSENT	ABSENT	UNKNOWN	NO	1.01
7.03.045.009	ZAGON	CENTRU	RURAL	46	40-60	M	170	89.5	30.97	PRESENT	PRESENT	NO	NO	NO	0.0089	235	5.5	113	4.9	6.8	0.79	69.84	NO	ABSENT	ABSENT	NO	NO	0.68
7.03.045.010	ZAGON	CENTRU	RURAL	71	>60	F	152	81	35.06	PRESENT	ABSENT	YES	NO	NO	0.0075	114	10.5	44	23.9	5.2	0.66	58.34	NO	ABSENT	ABSENT	NO	NO
7.03.045.011	ZAGON	CENTRU	RURAL	29	< 40 ?	M	186	82	23.7	ABSENT	ABSENT	NO	YES	NO	0.0105	168	4.9	111	4.4	4.7	0.93	82.21	NO	ABSENT	ABSENT	NO	NO
7.03.045.012	ZAGON	CENTRU	RURAL	49	40-60	F	170	135	46.71	PRESENT	ABSENT	YES	NO	NO	0.0075	329	5.2	76	6.8	4.9	0.66	58.34	NO	ABSENT	ABSENT	NO	NO
7.03.045.013	ZAGON	CENTRU	RURAL	32	< 40 ?	F	160	73	28.52	ABSENT	ABSENT	NO	YES	NO	0.008	117	5.1	69	7.4	4.6	0.71	62.76	NO	ABSENT	ABSENT	NO	NO
7.03.045.014	ZAGON	CENTRU	RURAL	74	>60	M	164	88.7	32.98	PRESENT	ABSENT	YES	NO	YES	0.0099	254	6.1	78	7.8	5.7	0.88	77.79	NO	ABSENT	ABSENT	YES	NO
7.03.045.015	ZAGON	CENTRU	RURAL	18	< 40 ?	F	158	46.8	18.75	ABSENT	ABSENT	NO	YES	NO	0.0086	263	5	137	3.6	4.1	0.76	67.18	NO	ABSENT	ABSENT	NO	NO
7.03.045.016	ZAGON	CENTRU	RURAL	18	< 40 ?	M	181	67.9	20.73	ABSENT	ABSENT	NO	YES	NO	0.0092	59	9.1	295	3.1	5.2	0.81	71.6	NO	ABSENT	ABSENT	NO	NO
7.04.006.001	MIERYESREA CIUC	CENTRU	URBAN	66	>60	F	157	78	31.64	PRESENT	ABSENT	NO	NO	NO	0.0096	62	5.5	45	12.2	6.1	0.85	75.14	NO	ABSENT	ABSENT	YES	NO
7.04.006.002	MIERYESREA CIUC	CENTRU	URBAN	69	>60	F	161	77.5	29.9	ABSENT	ABSENT	YES	NO	NO	0.0092	140	5.5	83	6.6	4.6	0.81	71.6	NO	.	ABSENT	.	0
7.04.006.003	MIERYESREA CIUC	CENTRU	URBAN	67	>60	M	162	77	29.34	ABSENT	ABSENT	YES	NO	NO	0.011	176	5.6	67	8.4	4.4	0.97	85.75	NO	ABSENT	ABSENT	UNKNOWN	NO
7.04.006.004	MIERYESREA CIUC	CENTRU	URBAN	52	40-60	F	165	91.8	33.72	PRESENT	ABSENT	YES	NO	NO	0.0098	98	5.5	116	4.7	4.8	0.87	76.91	NO	ABSENT	ABSENT	NO	NO
7.04.006.005	MIERYESREA CIUC	CENTRU	URBAN	75	>60	M	170	78	26.99	ABSENT	ABSENT	NO	NO	NO	0.0084	95	103.5	35	295.7	3.2	0.74	65.42	NO	ABSENT	ABSENT	NO	NO
7.04.006.007	MIERYESREA CIUC	CENTRU	URBAN	39	< 40 ?	M	180	92	28.4	ABSENT	ABSENT	YES	NO	NO	0.0124	82	8	234	3.4	5.3	1.1	97.24	NO	ABSENT	ABSENT	NO	NO
7.04.006.008	MIERYESREA CIUC	CENTRU	URBAN	58	40-60	M	177	102	32.56	PRESENT	ABSENT	YES	NO	NO	0.0103	142	14.3	206	6.9	5.8	0.91	80.44	NO	ABSENT	ABSENT	YES	NO
7.04.006.009	MIERYESREA CIUC	CENTRU	URBAN	37	< 40 ?	F	165	72	26.45	ABSENT	ABSENT	NO	YES	NO	0.0081	106	5.7	83	6.9	4.1	0.72	63.65	NO	ABSENT	ABSENT	YES	NO
7.04.006.010	MIERYESREA CIUC	CENTRU	URBAN	24	< 40 ?	F	162	50	19.05	ABSENT	PRESENT	NO	YES	NO	0.0082	124	5.5	98	5.6	4.2	0.73	64.53	NO	ABSENT	ABSENT	NO	NO
7.04.006.011	MIERYESREA CIUC	CENTRU	URBAN	41	40-60	F	152	57.9	25.06	ABSENT	PRESENT	NO	YES	NO	0.0084	111	5.4	139	3.9	2.3	0.74	65.42	NO	ABSENT	ABSENT	NO	NO
7.04.006.012	MIERYESREA CIUC	CENTRU	URBAN	36	< 40 ?	M	173	75	25.06	ABSENT	ABSENT	YES	NO	YES	0.0092	143	5.4	115	4.7	6.3	0.81	71.6	NO	.	ABSENT	.	0	0.52
7.04.006.013	MIERYESREA CIUC	CENTRU	URBAN	41	40-60	F	164	129.9	48.3	PRESENT	ABSENT	YES	NO	NO	0.0067	112	7.3	122	6	6.9	0.59	52.16	NO	ABSENT	ABSENT	NO	NO	0.57
7.04.006.014	MIERYESREA CIUC	CENTRU	URBAN	28	< 40 ?	M	181	93	28.39	ABSENT	ABSENT	NO	YES	NO	0.0112	72	5.3	154	3.4	6.6	0.99	87.52	NO	ABSENT	ABSENT	NO	NO	0.44
7.04.006.015	MIERYESREA CIUC	CENTRU	URBAN	33	< 40 ?	M	186	86.9	25.12	ABSENT	ABSENT	NO	NO	YES	0.0102	115	6.5	260	2.5	8.7	0.9	79.56	NO	ABSENT	ABSENT	NO	NO
7.04.006.016	MIERYESREA CIUC	CENTRU	URBAN	33	< 40 ?	M	177	73	23.3	ABSENT	PRESENT	NO	YES	NO	0.0116	155	5.2	61	8.5	5.1	1.03	91.05	NO	ABSENT	ABSENT	NO	NO
7.04.006.017	MIERYESREA CIUC	CENTRU	URBAN	46	40-60	M	175	84	27.43	ABSENT	PRESENT	YES	YES	YES	0.0121	208	5.5	190	2.9	7	1.07	94.59	NO	ABSENT	ABSENT	NO	NO
7.04.006.018	MIERYESREA CIUC	CENTRU	URBAN	34	< 40 ?	F	161	61.3	23.65	ABSENT	ABSENT	YES	YES	NO	0.0073	93	5.3	59	9	3.6	0.65	57.46	NO	ABSENT	ABSENT	NO	NO
7.04.006.019	MIERYESREA CIUC	CENTRU	URBAN	18	< 40 ?	M	171	75	25.65	ABSENT	PRESENT	NO	YES	NO	0.0093	76	6	92	6.5	7.9	0.82	72.49	NO	ABSENT	ABSENT	NO	NO
7.04.006.020	MIERYESREA CIUC	CENTRU	URBAN	18	< 40 ?	F	164	50	18.59	ABSENT	PRESENT	NO	YES	NO	0.009	139	20.8	208	10	6.7	0.8	70.72	NO	ABSENT	ABSENT	NO	NO
7.04.006.021	MIERYESREA CIUC	CENTRU	URBAN	18	< 40 ?	F	160	50.7	19.8	ABSENT	PRESENT	YES	YES	NO	0.008	94	7.4	223	3.3	4.3	0.71	62.76	NO	ABSENT	ABSENT	NO	NO
7.04.006.024	MIERYESREA CIUC	CENTRU	URBAN	18	< 40 ?	M	185	72	21.04	ABSENT	ABSENT	NO	YES	NO	0.0103	159	18.4	200	9.2	5.8	0.91	80.44	NO	ABSENT	ABSENT	YES	YES
7.04.006.025	MIERYESREA CIUC	CENTRU	URBAN	28	< 40 ?	F	168	75.4	26.71	ABSENT	PRESENT	NO	YES	NO	0.007	122	5.5	121	4.5	4.6	0.62	54.81	NO	ABSENT	ABSENT	NO	NO
7.04.020.001	CORUND	CENTRU	RURAL	72	>60	F	151	80	35.09	PRESENT	ABSENT	YES	NO	YES	0.0063	119	5.6	71	7.9	5.3	0.56	49.5	NO	ABSENT	ABSENT	NO	NO
7.04.020.002	CORUND	CENTRU	RURAL	63	>60	F	147	62	28.69	ABSENT	ABSENT	NO	YES	NO	0.0087	215	5.2	113	4.6	4.9	0.77	68.07	NO	ABSENT	ABSENT	NO	NO
7.04.020.003	CORUND	CENTRU	RURAL	20	< 40 ?	F	165	52	19.1	ABSENT	PRESENT	YES	YES	NO	0.0068	154	17.4	245	7.1	4.5	0.6	53.04	NO	ABSENT	ABSENT	NO	NO
7.04.020.004	CORUND	CENTRU	RURAL	24	< 40 ?	M	180	69.4	21.42	ABSENT	PRESENT	NO	YES	NO	0.0072	267	5.2	154	3.4	4.2	0.64	56.58	NO	ABSENT	ABSENT	NO	NO
7.04.020.005	CORUND	CENTRU	RURAL	41	40-60	M	180	88.6	27.35	ABSENT	PRESENT	NO	YES	NO	0.0088	99	5.5	123	4.5	4.4	0.78	68.95	NO	ABSENT	ABSENT	NO	NO
7.04.020.006	CORUND	CENTRU	RURAL	33	< 40 ?	F	155	60	24.97	ABSENT	PRESENT	NO	YES	NO	0.0071	38	5.1	30	17	4.1	0.63	55.69	NO	ABSENT	ABSENT	NO	NO
7.04.020.007	CORUND	CENTRU	RURAL	66	>60	M	169	108.3	37.92	PRESENT	ABSENT	YES	NO	NO	0.009	219	5.1	105	4.9	4.4	0.8	70.72	NO	ABSENT	ABSENT	NO	NO
7.04.020.008	CORUND	CENTRU	RURAL	43	40-60	F	157	72	29.21	ABSENT	ABSENT	NO	YES	NO	0.0075	107	5.5	51	10.8	5.2	0.66	58.34	NO	ABSENT	ABSENT	NO	NO
7.04.020.009	CORUND	CENTRU	RURAL	63	>60	M	175	103.5	33.8	PRESENT	ABSENT	YES	NO	NO	0.0114	165	5.3	144	3.7	6.2	1.01	89.28	NO	ABSENT	ABSENT	NO	NO
7.04.020.010	CORUND	CENTRU	RURAL	77	>60	M	154	73	30.78	PRESENT	ABSENT	YES	NO	NO	0.0107	153	5.6	120	4.7	6.1	0.95	83.98	NO	ABSENT	ABSENT	NO	NO
7.04.020.011	CORUND	CENTRU	RURAL	77	>60	F	153	68.3	29.18	ABSENT	ABSENT	YES	NO	NO	0.008	166	5.3	44	12	5.9	0.71	62.76	NO	ABSENT	ABSENT	NO	NO
7.04.020.012	CORUND	CENTRU	RURAL	27	< 40 ?	F	157	52.4	21.26	ABSENT	PRESENT	NO	YES	NO	0.0079	146	5.9	125	4.7	2.6	0.7	61.88	NO	ABSENT	ABSENT	NO	NO
7.04.020.014	CORUND	CENTRU	RURAL	64	>60	M	166	75	27.22	ABSENT	PRESENT	YES	NO	NO	0.0086	306	7	96	7.3	4.4	0.76	67.18	NO	ABSENT	ABSENT	YES	NO
7.05.001.001	TARGU MURES	CENTRU	URBAN	67	>60	F	150	63.6	28.27	ABSENT	ABSENT	NO	NO	NO	0.0086	108	7.1	57	12.5	5.2	0.76	67.18	NO	ABSENT	ABSENT	NO	NO
7.05.001.002	TARGU MURES	CENTRU	URBAN	68	>60	F	160	76.6	29.92	ABSENT	ABSENT	YES	NO	YES	0.0093	117	6.5	65	10	6.2	0.82	72.49	NO	ABSENT	ABSENT	NO	NO
7.05.001.003	TARGU MURES	CENTRU	URBAN	27	< 40 ?	F	166	53.5	19.42	ABSENT	PRESENT	NO	YES	NO	0.0088	83	5.8	161	3.6	4.7	0.78	68.95	NO	ABSENT	ABSENT	NO	NO	0.58
7.05.001.004	TARGU MURES	CENTRU	URBAN	71	>60	M	164	69.3	25.77	ABSENT	ABSENT	YES	NO	NO	0.0129	83	15	58	25.9	5.3	1.14	100.78	NO	ABSENT	ABSENT	YES	NO
7.05.001.005	TARGU MURES	CENTRU	URBAN	68	>60	F	158	65.9	26.4	ABSENT	ABSENT	NO	NO	NO	0.0067	66	6.2	26	23.8	3.6	0.59	52.16	NO	ABSENT	ABSENT	NO	NO	0.64
7.05.001.006	TARGU MURES	CENTRU	URBAN	50	40-60	F	155	60.2	25.06	ABSENT	ABSENT	YES	NO	NO	0.0068	101	32.6	205	15.9	3.9	0.6	53.04	NO	ABSENT	ABSENT	NO	NO
7.05.001.007	TARGU MURES	CENTRU	URBAN	63	>60	F	165	121.4	44.59	PRESENT	ABSENT	YES	YES	YES	0.0081	99	6	78	7.7	7.7	0.72	63.65	NO	ABSENT	ABSENT	NO	NO
7.05.001.008	TARGU MURES	CENTRU	URBAN	30	< 40 ?	F	171	70.6	24.14	ABSENT	PRESENT	NO	YES	NO	0.007	66	6.2	94	6.6	4.3	0.62	54.81	NO	ABSENT	ABSENT	YES	NO
7.05.001.009	TARGU MURES	CENTRU	URBAN	46	40-60	M	163	75.9	28.57	ABSENT	PRESENT	NO	NO	NO	0.0104	170	5.7	117	4.9	5	0.92	81.33	NO	ABSENT	ABSENT	NO	YES
7.05.001.010	TARGU MURES	CENTRU	URBAN	25	< 40 ?	F	174	69.8	23.05	ABSENT	PRESENT	YES	YES	NO	0.0079	89	679.4	188	361.4	4.6	0.7	61.88	NO	.	PRESENT	.	0
7.05.001.012	TARGU MURES	CENTRU	URBAN	48	40-60	F	163	60.2	22.66	ABSENT	ABSENT	NO	YES	NO	0.0084	133	6	170	3.5	5	0.74	65.42	NO	ABSENT	ABSENT	YES	NO	0.63
7.05.001.014	TARGU MURES	CENTRU	URBAN	46	40-60	F	155	55.3	23.02	ABSENT	ABSENT	NO	YES	NO	0.0099	78	9.1	181	5	4.6	0.88	77.79	NO	.	ABSENT	.	0
7.05.001.015	TARGU MURES	CENTRU	URBAN	61	>60	M	172	89.6	30.29	PRESENT	ABSENT	YES	NO	YES	0.0099	146	6.1	197	3.1	5.7	0.88	77.79	NO	ABSENT	ABSENT	NO	NO
7.05.001.016	TARGU MURES	CENTRU	URBAN	34	< 40 ?	M	196	95	24.73	ABSENT	PRESENT	YES	NO	NO	0.0124	98	6.6	213	3.1	8.2	1.1	97.24	NO	ABSENT	ABSENT	NO	NO
7.05.001.017	TARGU MURES	CENTRU	URBAN	23	< 40 ?	F	171	52	17.78	ABSENT	PRESENT	NO	YES	NO	0.0111	108	5.8	166	3.5	4.2	0.98	86.63	NO	ABSENT	ABSENT	NO	NO
7.05.001.018	TARGU MURES	CENTRU	URBAN	79	>60	F	150	62.2	27.64	ABSENT	ABSENT	YES	YES	YES	0.0119	254	31.6	125	25.3	6.9	1.05	92.82	NO	ABSENT	ABSENT	NO	NO
7.05.001.019	TARGU MURES	CENTRU	URBAN	76	>60	M	161	90.5	34.91	PRESENT	PRESENT	NO	NO	YES	0.0106	84	21.7	78	27.8	6	0.94	83.1	NO	ABSENT	ABSENT	NO	NO
7.05.001.020	TARGU MURES	CENTRU	URBAN	45	40-60	M	158	73.1	29.28	ABSENT	ABSENT	YES	NO	YES	0.0093	84	2	182	1.1	5	0.82	72.49	NO	ABSENT	ABSENT	NO	NO
7.05.001.021	TARGU MURES	CENTRU	URBAN	48	40-60	M	173	116	38.76	PRESENT	PRESENT	YES	NO	NO	0.0059	206	1	70	1.4	5.3	0.52	45.97	NO	ABSENT	ABSENT	NO	NO
7.05.001.022	TARGU MURES	CENTRU	URBAN	59	40-60	F	152	53.3	23.07	ABSENT	ABSENT	NO	NO	NO	0.0066	121	0.4	119	0.3	3.9	0.58	51.27	NO	ABSENT	ABSENT	NO	NO
7.05.001.023	TARGU MURES	CENTRU	URBAN	58	40-60	M	167	101.8	36.5	PRESENT	ABSENT	NO	YES	NO	0.0102	124	28.5	179	15.9	4.9	0.9	79.56	NO	ABSENT	ABSENT	YES	NO
7.05.001.024	TARGU MURES	CENTRU	URBAN	73	>60	M	172	80.3	27.14	ABSENT	ABSENT	NO	NO	NO	0.0102	114	30.7	118	26	6.1	0.9	79.56	NO	ABSENT	ABSENT	NO	NO
7.05.001.026	TARGU MURES	CENTRU	URBAN	24	< 40 ?	F	163	68	25.59	ABSENT	PRESENT	NO	YES	NO	0.007	60	5.8	84	6.9	4.6	0.62	54.81	NO	ABSENT	ABSENT	YES	NO
7.05.001.027	TARGU MURES	CENTRU	URBAN	43	40-60	M	182	85.5	25.81	ABSENT	PRESENT	YES	YES	NO	0.0104	132	5.6	134	4.2	4.4	0.92	81.33	NO	ABSENT	ABSENT	NO	NO
7.05.001.028	TARGU MURES	CENTRU	URBAN	48	40-60	F	157	66.6	27.02	ABSENT	ABSENT	NO	YES	NO	0.0075	75	6.7	147	4.6	3.6	0.66	58.34	NO	.	ABSENT	.	0
7.05.078.001	SINCRAIU DE MURES	CENTRU	RURAL	71	>60	M	166	76.7	27.83	ABSENT	ABSENT	YES	NO	NO	0.0108	147	8.5	94	9	6	0.96	84.86	NO	ABSENT	ABSENT	NO	NO	0.84
7.05.078.002	SINCRAIU DE MURES	CENTRU	RURAL	58	40-60	F	154	58.9	24.84	ABSENT	ABSENT	NO	YES	NO	0.008	75	5.7	54	10.6	5.4	0.71	62.76	NO	ABSENT	ABSENT	NO	NO	0.61
7.05.078.003	SINCRAIU DE MURES	CENTRU	RURAL	44	40-60	M	172	77.6	26.23	ABSENT	ABSENT	NO	YES	YES	0.0101	247	12.7	147	8.6	5.5	0.89	78.68	NO	ABSENT	ABSENT	NO	NO	0.66
7.05.078.004	SINCRAIU DE MURES	CENTRU	RURAL	43	40-60	F	164	87.8	32.64	PRESENT	ABSENT	YES	NO	NO	0.0076	50	9	137	6.6	5.1	0.67	59.23	NO	ABSENT	ABSENT	YES	NO	0.6
7.05.078.005	SINCRAIU DE MURES	CENTRU	RURAL	40	40-60	F	155	69.2	28.8	ABSENT	ABSENT	YES	NO	NO	0.0082	175	5.4	84	6.4	3.4	0.73	64.53	NO	ABSENT	ABSENT	NO	NO	0.54
7.05.078.006	SINCRAIU DE MURES	CENTRU	RURAL	40	40-60	F	159	69.7	27.57	ABSENT	ABSENT	NO	NO	NO	0.0084	151	1.1	114	1	3.6	0.74	65.42	NO	ABSENT	ABSENT	NO	NO	0.53
7.05.078.007	SINCRAIU DE MURES	CENTRU	RURAL	35	< 40 ?	F	161	57.1	22.03	ABSENT	PRESENT	NO	YES	NO	0.0077	104	5.1	117	4.4	5.6	0.68	60.11	NO	ABSENT	ABSENT	NO	NO
7.05.078.008	SINCRAIU DE MURES	CENTRU	RURAL	45	40-60	F	153	85.9	36.7	PRESENT	ABSENT	NO	NO	YES	0.0073	196	5.3	159	3.3	4.1	0.65	57.46	NO	ABSENT	ABSENT	YES	NO	0.64
7.05.078.009	SINCRAIU DE MURES	CENTRU	RURAL	26	< 40 ?	F	158	64.4	25.8	ABSENT	ABSENT	NO	NO	NO	0.0058	176	82.1	234	35.1	3.4	0.51	45.08	NO	ABSENT	ABSENT	NO	NO	0.49
7.05.078.010	SINCRAIU DE MURES	CENTRU	RURAL	38	< 40 ?	M	177	92.1	29.4	ABSENT	ABSENT	NO	NO	YES	0.0106	144	9.8	282	3.5	5.4	0.94	83.1	.	ABSENT	ABSENT	NO	NO	0.89
7.05.078.011	SINCRAIU DE MURES	CENTRU	RURAL	40	40-60	F	160	67.1	26.21	ABSENT	PRESENT	NO	YES	NO	0.0053	108	7.4	90	8.2	2.9	0.47	41.55	NO	ABSENT	ABSENT	NO	NO	0.49
7.05.078.012	SINCRAIU DE MURES	CENTRU	RURAL	27	< 40 ?	F	163	56.9	21.42	ABSENT	PRESENT	NO	YES	YES	0.0081	146	5.5	158	3.5	3.4	0.72	63.65	NO	ABSENT	ABSENT	NO	NO	0.46
7.05.078.013	SINCRAIU DE MURES	CENTRU	RURAL	51	40-60	F	172	65.1	22.01	ABSENT	PRESENT	YES	NO	NO	0.006	60	21.3	22	96.8	3.5	0.53	46.85	NO	ABSENT	ABSENT	NO	NO	0.68
7.05.078.014	SINCRAIU DE MURES	CENTRU	RURAL	41	40-60	M	182	116.4	35.14	PRESENT	ABSENT	YES	YES	NO	0.0087	202	5.3	79	6.7	5.9	0.77	68.07	.	ABSENT	ABSENT	NO	NO	0.67
7.05.078.015	SINCRAIU DE MURES	CENTRU	RURAL	60	>60	M	174	94.7	31.28	PRESENT	ABSENT	YES	NO	NO	0.0076	143	620.6	161	385.5	8.1	0.67	59.23	NO	ABSENT	PRESENT	YES	NO
7.05.078.016	SINCRAIU DE MURES	CENTRU	RURAL	29	< 40 ?	M	177	95.8	30.58	PRESENT	PRESENT	NO	NO	YES	0.0097	197	5.5	265	2.1	7.3	0.86	76.02	NO	ABSENT	ABSENT	NO	NO	0.54
7.05.078.017	SINCRAIU DE MURES	CENTRU	RURAL	26	< 40 ?	M	180	96.2	29.69	ABSENT	PRESENT	NO	YES	NO	0.0081	135	11.2	97	11.5	8.5	0.72	63.65	NO	ABSENT	ABSENT	NO	NO	0.46
7.05.078.018	SINCRAIU DE MURES	CENTRU	RURAL	55	40-60	F	166	84.8	30.77	PRESENT	ABSENT	NO	NO	NO	0.0085	68	11	41	26.8	3.8	0.75	66.3	NO	ABSENT	ABSENT	NO	NO	0.71
7.05.078.019	SINCRAIU DE MURES	CENTRU	RURAL	69	>60	F	158	91.8	36.77	PRESENT	ABSENT	YES	NO	NO	0.0084	65	5.6	34	16.5	5	0.74	65.42	NO	ABSENT	ABSENT	NO	NO	0.87
7.05.078.020	SINCRAIU DE MURES	CENTRU	RURAL	75	>60	M	171	102.2	34.95	PRESENT	ABSENT	YES	NO	NO	0.011	119	5.4	89	6.1	8.7	0.97	85.75	NO	ABSENT	ABSENT	NO	NO	0.88
7.05.078.021	SINCRAIU DE MURES	CENTRU	RURAL	57	40-60	M	163	80.3	30.22	PRESENT	ABSENT	YES	NO	NO	0.0093	201	32.4	176	18.4	5.9	0.82	72.49	NO	ABSENT	ABSENT	NO	NO	0.78
7.05.078.022	SINCRAIU DE MURES	CENTRU	RURAL	47	40-60	M	168	103.5	36.67	PRESENT	ABSENT	YES	NO	NO	0.0097	213	6	108	5.6	5.1	0.86	76.02	NO	ABSENT	ABSENT	NO	NO	0.87
7.06.001.001	SIBIU	CENTRU	URBAN	28	< 40 ?	M	174	89.9	29.69	ABSENT	ABSENT	NO	YES	NO	0.0101	25	5.4	39	13.8	6.4	0.89	78.68	NO	ABSENT	ABSENT	NO	NO	0.66
7.06.001.002	SIBIU	CENTRU	URBAN	60	>60	M	170	102.7	35.54	PRESENT	ABSENT	YES	NO	NO	0.0073	153	5.7	48	11.9	3.9	0.65	57.46	NO	ABSENT	ABSENT	NO	NO	0.68
7.06.001.003	SIBIU	CENTRU	URBAN	65	>60	M	180	120.1	37.07	PRESENT	ABSENT	YES	NO	NO	0.0071	107	5.2	77	6.8	4.2	0.63	55.69	NO	ABSENT	ABSENT	NO	NO	0.99
7.06.001.004	SIBIU	CENTRU	URBAN	62	>60	F	166	65.4	23.73	ABSENT	PRESENT	NO	NO	NO	0.0092	101	5.3	194	2.7	5.9	0.81	71.6	NO	ABSENT	ABSENT	NO	NO	0.69
7.06.001.008	SIBIU	CENTRU	URBAN	69	>60	F	151	56.4	24.74	ABSENT	ABSENT	YES	NO	NO	0.0078	81	22	103	21.4	6	0.69	61	NO	ABSENT	ABSENT	YES	NO	1
7.06.001.009	SIBIU	CENTRU	URBAN	74	>60	M	166	81.4	29.54	ABSENT	ABSENT	YES	NO	YES	0.0071	146	6.1	120	5.1	5.1	0.63	55.69	NO	ABSENT	ABSENT	YES	NO	0.93
7.06.001.010	SIBIU	CENTRU	URBAN	65	>60	F	149	76.6	34.5	PRESENT	ABSENT	YES	NO	NO	0.007	32	5.4	21	25.7	3.4	0.62	54.81	NO	ABSENT	ABSENT	NO	NO
7.06.001.011	SIBIU	CENTRU	URBAN	62	>60	F	150	79	35.11	PRESENT	ABSENT	NO	NO	YES	0.0075	143	5.3	64	8.3	3.3	0.66	58.34	NO	ABSENT	ABSENT	YES	NO
7.06.001.012	SIBIU	CENTRU	URBAN	63	>60	F	163	91	34.25	PRESENT	ABSENT	YES	YES	NO	0.0102	77	7.2	66	10.9	2.7	0.9	79.56	NO	ABSENT	ABSENT	YES	NO
7.06.001.013	SIBIU	CENTRU	URBAN	71	>60	M	160	92	35.94	PRESENT	ABSENT	YES	NO	NO	0.0085	116	20.8	68	30.6	6.6	0.75	66.3	NO	ABSENT	ABSENT	YES	NO
7.06.001.014	SIBIU	CENTRU	URBAN	64	>60	F	158	99.4	39.82	PRESENT	ABSENT	YES	NO	NO	0.0108	176	5.1	94	5.4	6.3	0.96	84.86	NO	ABSENT	ABSENT	NO	NO
7.06.001.015	SIBIU	CENTRU	URBAN	65	>60	M	179	104	32.46	PRESENT	ABSENT	YES	NO	NO	0.0089	191	5.9	156	3.8	5.9	0.79	69.84	NO	ABSENT	ABSENT	NO	NO
7.06.001.016	SIBIU	CENTRU	URBAN	73	>60	F	160	68	26.56	ABSENT	PRESENT	NO	NO	YES	0.0064	86	5.1	52	9.8	4.1	0.57	50.39	NO	ABSENT	ABSENT	NO	NO
7.06.001.017	SIBIU	CENTRU	URBAN	66	>60	F	160	72.8	28.44	ABSENT	ABSENT	NO	NO	YES	0.0101	107	7.8	40	19.5	5.1	0.89	78.68	NO	ABSENT	ABSENT	NO	NO	0.79
7.06.001.018	SIBIU	CENTRU	URBAN	73	>60	F	146	74.9	35.14	PRESENT	ABSENT	YES	NO	NO	0.005	92	6.9	48	14.4	5.9	0.44	38.9	NO	ABSENT	ABSENT	NO	NO	0.8
7.06.001.019	SIBIU	CENTRU	URBAN	77	>60	M	161	75.4	29.09	ABSENT	ABSENT	YES	NO	NO	0.0077	252	5.8	45	12.9	4.3	0.68	60.11	NO	ABSENT	ABSENT	NO	NO	0.67
7.06.001.020	SIBIU	CENTRU	URBAN	73	>60	F	148	81.6	37.25	PRESENT	ABSENT	YES	NO	NO	0.007	133	5.8	36	16.1	4.7	0.62	54.81	NO	ABSENT	ABSENT	NO	NO	1
7.06.001.021	SIBIU	CENTRU	URBAN	31	< 40 ?	M	181	95.5	29.15	ABSENT	PRESENT	NO	NO	NO	0.0092	267	5.1	182	2.8	6.2	0.81	71.6	NO	ABSENT	ABSENT	NO	NO
7.06.001.023	SIBIU	CENTRU	URBAN	25	< 40 ?	F	165	54.1	19.87	ABSENT	PRESENT	NO	YES	NO	0.008	49	6.7	190	3.5	4.7	0.71	62.76	NO	ABSENT	ABSENT	YES	NO
7.06.001.024	SIBIU	CENTRU	URBAN	43	40-60	M	173	101.2	33.81	PRESENT	PRESENT	NO	NO	NO	0.0087	106	5.5	53	10.4	7.6	0.77	68.07	NO	ABSENT	ABSENT	NO	NO
7.06.001.025	SIBIU	CENTRU	URBAN	42	40-60	F	158	48.5	19.43	ABSENT	ABSENT	NO	YES	YES	0.0055	150	6.1	112	5.4	2.3	0.49	43.32	NO	ABSENT	ABSENT	NO	NO
7.06.057.001	SELIMBER	CENTRU	RURAL	35	< 40 ?	M	178	81.9	25.85	ABSENT	PRESENT	NO	NO	NO	0.011	68	11.5	241	4.8	6.9	0.97	85.75	NO	ABSENT	ABSENT	NO	NO
7.06.057.002	SELIMBER	CENTRU	RURAL	66	>60	F	154	72	30.36	PRESENT	ABSENT	NO	NO	NO	0.0082	70	5.2	66	7.9	3.7	0.73	64.53	NO	ABSENT	ABSENT	NO	NO
7.06.057.003	SELIMBER	CENTRU	RURAL	64	>60	F	161	98	37.81	PRESENT	ABSENT	YES	YES	NO	0.0092	103	5.5	22	25	3.9	0.81	71.6	NO	ABSENT	ABSENT	NO	NO	0.55
7.06.057.004	SELIMBER	CENTRU	RURAL	62	>60	F	163	99.5	37.45	PRESENT	ABSENT	YES	NO	NO	0.0081	234	5.2	103	5	6.6	0.72	63.65	NO	ABSENT	ABSENT	YES	NO
7.06.057.005	SELIMBER	CENTRU	RURAL	45	40-60	M	173	85.5	28.57	ABSENT	PRESENT	NO	YES	NO	0.0097	94	5.5	258	2.1	3	0.86	76.02	NO	ABSENT	ABSENT	NO	NO
7.06.057.006	SELIMBER	CENTRU	RURAL	48	40-60	F	168	75.6	26.79	ABSENT	ABSENT	NO	NO	YES	0.0072	172	6	164	3.7	4.3	0.64	56.58	NO	ABSENT	ABSENT	NO	NO
7.06.057.007	SELIMBER	CENTRU	RURAL	53	40-60	M	183	115.8	34.58	PRESENT	PRESENT	YES	NO	NO	0.0102	156	282.1	78	361.7	5.7	0.9	79.56	NO	ABSENT	PRESENT	NO	NO	0.8
7.06.057.008	SELIMBER	CENTRU	RURAL	80	>60	M	157	68.9	27.95	ABSENT	ABSENT	YES	NO	NO	0.0097	190	619	149	415.4	3.9	0.86	76.02	NO	ABSENT	PRESENT	NO	NO	0.93
7.06.057.012	SELIMBER	CENTRU	RURAL	23	< 40 ?	M	180	83.7	25.83	ABSENT	ABSENT	YES	NO	NO	0.0112	124	7.3	339	2.2	4.7	0.99	87.52	NO	ABSENT	ABSENT	NO	NO
7.06.057.013	SELIMBER	CENTRU	RURAL	40	40-60	M	180	86.7	26.76	ABSENT	PRESENT	YES	NO	NO	0.0089	188	6.2	177	3.5	5.6	0.79	69.84	NO	ABSENT	ABSENT	NO	NO
7.06.057.015	SELIMBER	CENTRU	RURAL	71	>60	M	173	120.9	40.4	PRESENT	ABSENT	YES	NO	NO	0.0188	149	633.4	47	1347.7	7	1.66	146.74	NO	ABSENT	PRESENT	YES	NO
7.06.057.016	SELIMBER	CENTRU	RURAL	32	< 40 ?	F	174	63.8	21.07	ABSENT	ABSENT	YES	YES	NO	0.0076	189	5.3	118	4.5	4.1	0.67	59.23	NO	ABSENT	ABSENT	YES	NO
7.06.057.017	SELIMBER	CENTRU	RURAL	23	< 40 ?	M	174	77.3	25.53	ABSENT	ABSENT	YES	NO	YES	0.0094	117	8.6	222	3.9	5.4	0.83	73.37	NO	ABSENT	ABSENT	NO	NO
7.06.057.018	SELIMBER	CENTRU	RURAL	61	>60	F	162	82	31.25	PRESENT	ABSENT	YES	NO	NO	0.0079	178	5.9	142	4.2	3.7	0.7	61.88	NO	.	ABSENT	.	0
8.01.001.101	BUYESRESTI	BUC-IL	URBAN	46	40-60	M	171	84	28.73	ABSENT	ABSENT	NO	YES	NO	0.0114	66	7.9	113	7	5.3	1.01	89.28	NO	.	ABSENT	.	.	0.56
8.01.001.102	BUYESRESTI	BUC-IL	URBAN	62	>60	F	156	68.4	28.11	ABSENT	PRESENT	YES	NO	NO	0.0076	102	3	76	3.9	5	0.67	59.23	NO	.	ABSENT	.	.	0.58
8.01.001.103	BUYESRESTI	BUC-IL	URBAN	33	< 40 ?	M	182	91	27.47	ABSENT	ABSENT	NO	YES	NO	0.0102	130	9.5	301	3.2	4.5	0.9	79.56	NO	.	ABSENT	.	.	0.7
8.01.001.104	BUYESRESTI	BUC-IL	URBAN	40	40-60	F	163	56.4	21.23	ABSENT	ABSENT	NO	YES	NO	0.0082	89	9.7	193	5	2.7	0.73	64.53	NO	.	ABSENT	.	.	0.52
8.01.001.105	BUYESRESTI	BUC-IL	URBAN	63	>60	F	166	60	21.77	ABSENT	ABSENT	NO	NO	NO	0.0072	153	3	89	3.4	3	0.64	56.58	NO	.	ABSENT	.	.	0.74
8.01.001.106	BUYESRESTI	BUC-IL	URBAN	42	40-60	F	159	89.7	35.48	PRESENT	ABSENT	NO	NO	NO	0.007	131	7.9	104	7.6	5.2	0.62	54.81	YES	ABSENT	PRESENT	NO	NO	0.71
8.01.001.107	BUYESRESTI	BUC-IL	URBAN	54	40-60	F	164	79.8	29.67	ABSENT	ABSENT	YES	NO	NO	0.0081	67	3	42	7.1	3.3	0.72	63.65	NO	.	ABSENT	.	.	0.6
8.01.001.108	BUYESRESTI	BUC-IL	URBAN	37	< 40 ?	M	176	75.7	24.44	ABSENT	ABSENT	NO	YES	NO	0.011	240	8.2	302	2.7	5.4	0.97	85.75	NO	.	ABSENT	.	.	0.67
8.01.001.109	BUYESRESTI	BUC-IL	URBAN	76	>60	F	154	66	27.83	ABSENT	ABSENT	YES	NO	NO	0.022	120	3	48	6.3	10.1	1.95	172.38	NO	ABSENT	ABSENT	NO	NO	0.61
8.01.001.110	BUYESRESTI	BUC-IL	URBAN	75	>60	M	175	72.4	23.64	ABSENT	ABSENT	NO	NO	NO	0.0093	175	15	183	8.2	3.8	0.82	72.49	NO	ABSENT	ABSENT	NO	NO	0.91
8.01.001.112	BUYESRESTI	BUC-IL	URBAN	62	>60	F	164	88.2	32.79	PRESENT	ABSENT	NO	NO	NO	0.0104	37	3	42	7.1	4.8	0.92	81.33	NO	.	ABSENT	.	0	0.76
8.01.001.113	BUYESRESTI	BUC-IL	URBAN	78	>60	F	154	61	25.72	ABSENT	ABSENT	YES	YES	NO	0.0133	75	3	15	20	5.3	1.18	104.31	YES	.	PRESENT	.	0	0.61
8.01.001.114	BUYESRESTI	BUC-IL	URBAN	57	40-60	M	185	87.6	25.6	ABSENT	ABSENT	YES	NO	NO	0.0289	113	3	67	4.5	8.1	2.56	226.3	.	.	PRESENT	.	0	0.51
8.01.001.115	BUYESRESTI	BUC-IL	URBAN	45	40-60	F	164	61	22.68	ABSENT	ABSENT	NO	YES	NO	0.0081	83	3	79	3.8	3.5	0.72	63.65	NO	ABSENT	ABSENT	NO	NO	0.51
8.01.001.116	BUYESRESTI	BUC-IL	URBAN	24	< 40 ?	F	171	54	18.47	ABSENT	ABSENT	NO	YES	NO	0.0084	55	3.8	114	3.3	4.1	0.74	65.42	NO	ABSENT	ABSENT	UNKNOWN	NO	0.54
8.01.001.117	BUYESRESTI	BUC-IL	URBAN	23	< 40 ?	M	200	99.3	24.83	ABSENT	ABSENT	NO	YES	NO	0.0102	53	5.6	272	2.1	7.3	0.9	79.56	NO	ABSENT	ABSENT	NO	NO	0.58
8.01.001.119	BUYESRESTI	BUC-IL	URBAN	51	40-60	F	159	70.9	28.04	ABSENT	ABSENT	YES	NO	NO	0.0095	100	3	82	3.7	4.5	0.84	74.26	NO	ABSENT	ABSENT	NO	NO	0.73
8.01.001.120	BUYESRESTI	BUC-IL	URBAN	71	>60	M	172	92.5	31.27	PRESENT	PRESENT	YES	YES	NO	0.016	231	5.5	98	5.6	6.1	1.42	125.53	NO	.	ABSENT	.	0	1.04
8.01.001.121	BUYESRESTI	BUC-IL	URBAN	80	>60	M	162	72	27.43	ABSENT	ABSENT	YES	YES	NO	0.0114	90	3	28	10.7	4.1	1.01	89.28	NO	.	ABSENT	.	0	0.83
8.01.001.122	BUYESRESTI	BUC-IL	URBAN	43	40-60	M	171	85.8	29.34	ABSENT	ABSENT	YES	YES	NO	0.0106	238	3.2	234	1.4	5	0.94	83.1	NO	ABSENT	ABSENT	NO	NO	0.63
8.01.001.123	BUYESRESTI	BUC-IL	URBAN	36	< 40 ?	F	162	72	27.43	ABSENT	ABSENT	YES	YES	NO	0.0072	120	3	169	1.8	3.2	0.64	56.58	NO	ABSENT	ABSENT	YES	NO	0.5
8.01.001.124	BUYESRESTI	BUC-IL	URBAN	30	< 40 ?	F	166	64.3	23.33	ABSENT	ABSENT	YES	YES	NO	0.007	72	3	118	2.5	2.7	0.62	54.81	NO	.	ABSENT	.	0	0.5
8.01.001.201	BUYESRESTI	BUC-IL	URBAN	62	>60	F	166	105	38.1	PRESENT	PRESENT	YES	NO	NO	0.0064	39	3	24	12.5	4	0.57	50.39	NO	ABSENT	ABSENT	NO	NO	0.78
8.01.001.202	BUYESRESTI	BUC-IL	URBAN	68	>60	F	161	54.5	21.03	ABSENT	ABSENT	YES	YES	NO	0.0059	15	3	21	14.3	2.4	0.52	45.97	NO	ABSENT	ABSENT	NO	NO	0.62
8.01.001.203	BUYESRESTI	BUC-IL	URBAN	61	>60	F	155	100.7	41.91	PRESENT	ABSENT	YES	NO	NO	0.007	100	3	81	3.7	4.7	0.62	54.81	NO	.	ABSENT	.	0	1.04
8.01.001.205	BUYESRESTI	BUC-IL	URBAN	61	>60	F	160	79.9	31.21	PRESENT	ABSENT	NO	YES	NO	0.0063	214	3	92	3.3	5.1	0.56	49.5	NO	ABSENT	ABSENT	NO	NO	0.6
8.01.001.206	BUYESRESTI	BUC-IL	URBAN	40	40-60	F	164	75.4	28.03	ABSENT	PRESENT	NO	YES	NO	0.0072	132	9.5	255	3.7	3.3	0.64	56.58	NO	ABSENT	ABSENT	NO	NO	0.54
8.01.001.207	BUYESRESTI	BUC-IL	URBAN	66	>60	M	172	72	24.34	ABSENT	ABSENT	NO	YES	NO	0.0104	160	3	108	2.8	4.3	0.92	81.33	NO	ABSENT	ABSENT	NO	NO	0.98
8.01.001.208	BUYESRESTI	BUC-IL	URBAN	29	< 40 ?	F	169	54.8	19.19	ABSENT	ABSENT	NO	YES	YES	0.0081	150	15.1	247	6.1	3.5	0.72	63.65	NO	ABSENT	ABSENT	NO	NO	0.46
8.01.001.209	BUYESRESTI	BUC-IL	URBAN	79	>60	M	160	88	34.38	PRESENT	ABSENT	YES	NO	NO	0.0115	134	11.4	80	14.3	6.3	1.02	90.17	NO	ABSENT	ABSENT	NO	NO	0.7
8.01.001.210	BUYESRESTI	BUC-IL	URBAN	80	>60	F	149	62.6	28.2	ABSENT	ABSENT	YES	YES	NO	0.0081	65	3	40	7.5	6	0.72	63.65	NO	ABSENT	ABSENT	NO	NO	0.81
8.01.001.211	BUYESRESTI	BUC-IL	URBAN	23	< 40 ?	M	179	70	21.85	ABSENT	ABSENT	NO	YES	NO	0.0085	80	3	104	2.9	4.3	0.75	66.3	NO	ABSENT	ABSENT	YES	NO	0.55
8.01.001.212	BUYESRESTI	BUC-IL	URBAN	65	>60	F	157	75	30.43	PRESENT	ABSENT	YES	NO	NO	0.0078	82	3	97	3.1	3.3	0.69	61	NO	ABSENT	ABSENT	UNKNOWN	NO	0.74
8.01.001.213	BUYESRESTI	BUC-IL	URBAN	65	>60	F	162	77	29.34	ABSENT	ABSENT	YES	NO	NO	0.006	88	3	44	6.8	5.6	0.53	46.85	NO	ABSENT	ABSENT	NO	NO	0.79
8.01.001.214	BUYESRESTI	BUC-IL	URBAN	43	40-60	F	169	139.3	48.77	PRESENT	PRESENT	YES	NO	NO	0.0079	75	3.4	173	2	5.4	0.7	61.88	NO	ABSENT	ABSENT	NO	NO	0.71
8.01.001.215	BUYESRESTI	BUC-IL	URBAN	66	>60	M	175	60.3	19.69	ABSENT	PRESENT	NO	NO	NO	0.0084	242	12.3	129	9.5	4.2	0.74	65.42	NO	ABSENT	ABSENT	NO	NO	0.59
8.01.001.216	BUYESRESTI	BUC-IL	URBAN	23	< 40 ?	F	163	50.6	19.04	ABSENT	ABSENT	NO	YES	NO	0.0072	58	25.7	276	9.3	2.9	0.64	56.58	NO	ABSENT	ABSENT	YES	NO	0.4
8.01.001.217	BUYESRESTI	BUC-IL	URBAN	46	40-60	F	163	80.4	30.26	PRESENT	ABSENT	YES	NO	NO	0.0079	152	5.6	156	3.6	6	0.7	61.88	NO	ABSENT	ABSENT	NO	NO	0.66
8.01.001.218	BUYESRESTI	BUC-IL	URBAN	35	< 40 ?	M	176	97.1	31.35	PRESENT	ABSENT	YES	NO	NO	0.0085	66	11.6	163	7.1	6	0.75	66.3	NO	ABSENT	ABSENT	NO	NO	0.61
8.01.001.219	BUYESRESTI	BUC-IL	URBAN	64	>60	M	174	92	30.39	PRESENT	ABSENT	YES	YES	NO	0.0106	191	3	169	1.8	6.2	0.94	83.1	NO	ABSENT	ABSENT	NO	NO	0.72
8.01.001.220	BUYESRESTI	BUC-IL	URBAN	70	>60	F	166	95.8	34.77	PRESENT	ABSENT	YES	YES	NO	0.0104	184	11.3	72	15.7	5.5	0.92	81.33	NO	ABSENT	ABSENT	NO	NO	0.63
8.01.001.221	BUYESRESTI	BUC-IL	URBAN	33	< 40 ?	F	165	77	28.28	ABSENT	ABSENT	NO	NO	NO	0.0076	210	3	185	1.6	4.3	0.67	59.23	NO	ABSENT	ABSENT	NO	NO	0.5
8.01.001.222	BUYESRESTI	BUC-IL	URBAN	52	40-60	M	174	100	33.03	PRESENT	ABSENT	YES	NO	NO	0.0118	75	6.2	50	12.4	5.7	1.04	91.94	.	ABSENT	ABSENT	NO	NO	0.51
8.01.001.223	BUYESRESTI	BUC-IL	URBAN	54	40-60	F	162	68.9	26.25	ABSENT	PRESENT	NO	YES	NO	0.006	75	3.2	58	5.5	3.2	0.53	46.85	NO	ABSENT	ABSENT	YES	NO	0.6
8.01.001.224	BUYESRESTI	BUC-IL	URBAN	42	40-60	F	160	58	22.66	ABSENT	PRESENT	NO	YES	NO	0.0075	143	6.3	252	2.5	4	0.66	58.34	NO	ABSENT	ABSENT	YES	NO	0.5
8.01.001.227	BUYESRESTI	BUC-IL	URBAN	47	40-60	F	155	77.7	32.34	PRESENT	PRESENT	NO	NO	NO	0.0075	54	7.5	96	7.8	2.7	0.66	58.34	NO	ABSENT	ABSENT	NO	NO	0.57
8.01.001.228	BUYESRESTI	BUC-IL	URBAN	47	40-60	M	173	93	31.07	PRESENT	PRESENT	NO	YES	YES	0.0118	106	27.3	233	11.7	6.3	1.04	91.94	NO	ABSENT	ABSENT	NO	NO	0.68
8.01.001.229	BUYESRESTI	BUC-IL	URBAN	39	< 40 ?	M	171	78.6	26.88	ABSENT	ABSENT	NO	NO	NO	0.0102	74	5.4	166	3.3	5	0.9	79.56	NO	.	ABSENT	.	.	0.58
8.01.001.230	BUYESRESTI	BUC-IL	URBAN	20	< 40 ?	M	185	74	21.62	ABSENT	ABSENT	NO	YES	YES	0.0101	131	3	93	3.2	4.8	0.89	78.68	NO	ABSENT	ABSENT	YES	NO	0.43
8.01.001.231	BUYESRESTI	BUC-IL	URBAN	58	40-60	M	177	77.1	24.61	ABSENT	ABSENT	YES	YES	NO	0.0098	60	3	139	2.2	4.8	0.87	76.91	NO	ABSENT	ABSENT	NO	NO	0.7
8.01.001.232	BUYESRESTI	BUC-IL	URBAN	25	< 40 ?	F	178	61	19.25	ABSENT	ABSENT	NO	YES	YES	0.0064	127	8.5	187	4.5	3.4	0.57	50.39	NO	ABSENT	ABSENT	NO	NO	0.53
8.01.001.233	BUYESRESTI	BUC-IL	URBAN	25	< 40 ?	F	175	58.2	19	ABSENT	PRESENT	NO	YES	NO	0.0067	17	3	38	7.9	4.7	0.59	52.16	NO	ABSENT	ABSENT	YES	NO	0.44
8.01.001.235	BUYESRESTI	BUC-IL	URBAN	29	< 40 ?	M	174	78.5	25.93	ABSENT	PRESENT	NO	YES	NO	0.0112	57	3.2	131	2.4	6	0.99	87.52	NO	.	ABSENT	.	0	0.51
8.01.001.236	BUYESRESTI	BUC-IL	URBAN	60	>60	F	152	69	29.86	ABSENT	ABSENT	NO	YES	NO	0.0069	34	18.7	239	7.8	4.6	0.61	53.92	NO	ABSENT	ABSENT	NO	NO	0.51
8.01.001.237	BUYESRESTI	BUC-IL	URBAN	58	40-60	M	182	107	32.3	PRESENT	ABSENT	NO	NO	NO	0.0084	149	3	107	2.8	5.2	0.74	65.42	NO	.	ABSENT	.	0	0.59
8.01.001.238	BUYESRESTI	BUC-IL	URBAN	48	40-60	M	165	93.1	34.2	PRESENT	PRESENT	YES	NO	NO	0.0111	110	32.5	123	26.4	6	0.98	86.63	NO	ABSENT	ABSENT	NO	NO	0.77
8.01.001.239	BUYESRESTI	BUC-IL	URBAN	55	40-60	M	183	84.1	25.11	ABSENT	PRESENT	NO	YES	YES	0.0111	208	3	65	4.6	6.7	0.98	86.63	YES	ABSENT	PRESENT	NO	NO	0.76
8.01.001.302	BUYESRESTI	BUC-IL	URBAN	42	40-60	F	163	59.9	22.55	ABSENT	ABSENT	NO	YES	NO	0.0107	119	22.9	117	19.6	3.4	0.95	83.98	NO	ABSENT	ABSENT	YES	NO	0.53
8.01.001.303	BUYESRESTI	BUC-IL	URBAN	65	>60	F	164	87.6	32.57	PRESENT	ABSENT	YES	NO	NO	0.0547	19	3	58	5.2	8	4.84	427.86	YES	ABSENT	PRESENT	YES	NO	0.57
8.01.001.304	BUYESRESTI	BUC-IL	URBAN	67	>60	F	154	77.8	32.8	PRESENT	ABSENT	YES	YES	NO	0.0062	104	3.5	125	2.8	3.8	0.55	48.62	NO	ABSENT	ABSENT	NO	NO	0.68
8.01.001.305	BUYESRESTI	BUC-IL	URBAN	63	>60	F	161	74	28.55	ABSENT	PRESENT	NO	NO	NO	0.0087	155	3	61	4.9	4.1	0.77	68.07	NO	ABSENT	ABSENT	NO	NO	0.61
8.01.001.306	BUYESRESTI	BUC-IL	URBAN	42	40-60	M	168	83	29.41	ABSENT	ABSENT	YES	YES	NO	0.0101	169	3	190	1.6	6.3	0.89	78.68	NO	ABSENT	ABSENT	NO	NO	0.71
8.01.001.307	BUYESRESTI	BUC-IL	URBAN	65	>60	M	180	122.8	37.9	PRESENT	ABSENT	YES	NO	YES	0.0106	227	25.6	78	32.8	5.3	0.94	83.1	NO	.	ABSENT	.	.	0.77
8.01.001.308	BUYESRESTI	BUC-IL	URBAN	41	40-60	F	168	67.6	23.95	ABSENT	ABSENT	NO	YES	NO	0.0076	135	3	60	5	3.7	0.67	59.23	NO	.	ABSENT	.	.	0.55
8.01.001.309	BUYESRESTI	BUC-IL	URBAN	56	40-60	F	166	58.8	21.34	ABSENT	ABSENT	YES	YES	NO	0.007	49	3	28	10.7	4.3	0.62	54.81	NO	.	ABSENT	.	.	0.55
8.01.001.310	BUYESRESTI	BUC-IL	URBAN	71	>60	F	155	67	27.89	ABSENT	ABSENT	YES	NO	NO	0.0085	70	21.8	31	70.3	6.1	0.75	66.3	UNKNOWN	ABSENT	ABSENT	YES	NO	0.66
8.01.001.311	BUYESRESTI	BUC-IL	URBAN	67	>60	M	175	91	29.71	ABSENT	PRESENT	YES	NO	NO	0.0087	117	3.5	78	4.5	4.4	0.77	68.07	NO	ABSENT	ABSENT	YES	NO	0.74
8.01.001.312	BUYESRESTI	BUC-IL	URBAN	46	40-60	M	181	126.2	38.52	PRESENT	PRESENT	YES	NO	NO	0.0085	180	81.2	167	48.6	6.1	0.75	66.3	NO	ABSENT	ABSENT	NO	NO	0.63
8.01.001.313	BUYESRESTI	BUC-IL	URBAN	59	40-60	M	170	90.6	31.35	PRESENT	ABSENT	YES	NO	NO	0.0112	87	3	141	2.1	4.9	0.99	87.52	NO	ABSENT	ABSENT	NO	NO	0.69
8.01.001.314	BUYESRESTI	BUC-IL	URBAN	75	>60	F	158	96.4	38.62	PRESENT	ABSENT	NO	NO	NO	0.0092	108	3	29	10.3	5.6	0.81	71.6	YES	ABSENT	PRESENT	YES	NO	0.9
8.01.001.315	BUYESRESTI	BUC-IL	URBAN	46	40-60	F	166	116.2	42.17	PRESENT	ABSENT	YES	NO	YES	0.0088	121	4.2	233	1.8	7.1	0.78	68.95	NO	ABSENT	ABSENT	YES	NO	0.46
8.01.001.316	BUYESRESTI	BUC-IL	URBAN	48	40-60	F	161	55.2	21.3	ABSENT	PRESENT	NO	YES	NO	0.0075	81	3	42	7.1	4.2	0.66	58.34	NO	ABSENT	ABSENT	NO	NO	0.64
8.01.001.317	BUYESRESTI	BUC-IL	URBAN	63	>60	F	162	70.7	26.94	ABSENT	ABSENT	NO	YES	NO	0.0078	99	3	67	4.5	4.8	0.69	61	NO	ABSENT	ABSENT	NO	NO	0.71
8.01.001.318	BUYESRESTI	BUC-IL	URBAN	71	>60	M	175	85.6	27.95	ABSENT	ABSENT	NO	YES	NO	0.0098	118	3	110	2.7	5.3	0.87	76.91	NO	ABSENT	ABSENT	NO	NO	0.86
8.01.001.319	BUYESRESTI	BUC-IL	URBAN	56	40-60	M	184	86.6	25.58	ABSENT	ABSENT	YES	YES	YES	0.009	177	3.5	193	1.8	4.7	0.8	70.72	NO	ABSENT	ABSENT	NO	NO	0.59
8.01.001.320	BUYESRESTI	BUC-IL	URBAN	63	>60	M	175	78.1	25.5	ABSENT	ABSENT	YES	NO	NO	0.0097	101	52.7	61	86.4	2.5	0.86	76.02	YES	ABSENT	PRESENT	NO	NO	0.74
8.01.001.321	BUYESRESTI	BUC-IL	URBAN	50	40-60	F	170	85.7	29.65	ABSENT	PRESENT	YES	YES	NO	0.0068	106	3	72	4.2	3.2	0.6	53.04	NO	ABSENT	ABSENT	YES	NO	0.7
8.01.001.322	BUYESRESTI	BUC-IL	URBAN	64	>60	M	163	77.8	29.28	ABSENT	ABSENT	YES	NO	NO	0.0166	109	313.8	63	498.1	4.6	1.47	129.95	YES	ABSENT	PRESENT	YES	NO	0.54
8.01.001.323	BUYESRESTI	BUC-IL	URBAN	35	< 40 ?	M	182	56.9	17.18	ABSENT	ABSENT	NO	YES	NO	0.0107	160	10	326	3.1	3.7	0.95	83.98	NO	ABSENT	ABSENT	YES	NO	0.54
8.01.001.324	BUYESRESTI	BUC-IL	URBAN	33	< 40 ?	M	175	65.2	21.29	ABSENT	ABSENT	NO	YES	NO	0.0107	182	3	178	1.7	5.6	0.95	83.98	NO	ABSENT	ABSENT	NO	NO	0.49
8.01.001.325	BUYESRESTI	BUC-IL	URBAN	70	>60	M	182	94.1	28.41	ABSENT	ABSENT	NO	NO	NO	0.0103	198	6.6	85	7.8	6.4	0.91	80.44	NO	ABSENT	ABSENT	NO	NO	0.67
8.01.001.326	BUYESRESTI	BUC-IL	URBAN	66	>60	F	166	75.2	27.29	ABSENT	ABSENT	NO	NO	NO	0.0088	135	3	110	2.7	4.7	0.78	68.95	NO	ABSENT	ABSENT	NO	NO	0.87
8.01.001.328	BUYESRESTI	BUC-IL	URBAN	47	40-60	F	154	50	21.08	ABSENT	ABSENT	NO	YES	YES	0.0068	49	3	43	7	4.8	0.6	53.04	NO	ABSENT	ABSENT	NO	NO	0.63
8.01.001.331	BUYESRESTI	BUC-IL	URBAN	59	40-60	M	173	88.9	29.7	ABSENT	ABSENT	NO	NO	NO	0.0108	124	4.8	53	9.1	7.6	0.96	84.86	NO	ABSENT	ABSENT	NO	NO	0.67
8.01.001.332	BUYESRESTI	BUC-IL	URBAN	32	< 40 ?	F	166	60.4	21.92	ABSENT	ABSENT	NO	YES	NO	0.0086	110	3.7	209	1.8	4.5	0.76	67.18	NO	ABSENT	ABSENT	YES	NO	0.49
8.01.001.333	BUYESRESTI	BUC-IL	URBAN	49	40-60	F	149	51.4	23.15	ABSENT	ABSENT	NO	YES	NO	0.009	0	3	34	8.8	4.1	0.8	70.72	NO	ABSENT	ABSENT	NO	NO	0.59
8.01.001.334	BUYESRESTI	BUC-IL	URBAN	39	< 40 ?	F	171	59	20.18	ABSENT	ABSENT	NO	YES	NO	0.0093	106	3	118	2.5	3.5	0.82	72.49	NO	.	ABSENT	.	0	0.54
8.01.001.335	BUYESRESTI	BUC-IL	URBAN	46	40-60	M	180	89.7	27.69	ABSENT	ABSENT	NO	YES	NO	0.0111	25	3	86	3.5	8.1	0.98	86.63	NO	ABSENT	ABSENT	YES	NO	0.57
8.01.001.336	BUYESRESTI	BUC-IL	URBAN	40	40-60	M	183	134	40.01	PRESENT	ABSENT	YES	YES	NO	0.009	172	5.2	168	3.1	6.1	0.8	70.72	NO	ABSENT	ABSENT	YES	NO	0.9
8.01.001.337	BUYESRESTI	BUC-IL	URBAN	21	< 40 ?	F	177	58	18.51	ABSENT	ABSENT	NO	YES	NO	0.0081	157	5.8	172	3.4	3.6	0.72	63.65	YES	ABSENT	PRESENT	YES	NO	0.48
8.01.001.338	BUYESRESTI	BUC-IL	URBAN	23	< 40 ?	M	183	83.5	24.93	ABSENT	ABSENT	NO	YES	NO	0.011	151	3	143	2.1	5.3	0.97	85.75	NO	ABSENT	ABSENT	YES	NO	0.51
8.01.001.401	BUYESRESTI	BUC-IL	URBAN	63	>60	M	173	87	29.07	ABSENT	ABSENT	YES	NO	NO	0.0104	118	23.3	157	14.8	6.1	0.92	81.33	NO	ABSENT	ABSENT	NO	NO	0.7
8.01.001.402	BUYESRESTI	BUC-IL	URBAN	56	40-60	F	154	56.5	23.82	ABSENT	ABSENT	YES	NO	NO	0.0087	111	3	85	3.5	4.4	0.77	68.07	YES	ABSENT	PRESENT	NO	NO	0.59
8.01.001.403	BUYESRESTI	BUC-IL	URBAN	43	40-60	M	178	112.6	35.54	PRESENT	ABSENT	YES	YES	NO	0.0097	183	3	155	1.9	5.3	0.86	76.02	NO	ABSENT	ABSENT	NO	NO	0.57
8.01.001.404	BUYESRESTI	BUC-IL	URBAN	40	40-60	F	157	76.5	31.04	PRESENT	ABSENT	NO	YES	NO	0.0061	31	7.2	50	14.4	3.9	0.54	47.74	NO	ABSENT	ABSENT	YES	NO	0.5
8.01.001.405	BUYESRESTI	BUC-IL	URBAN	39	< 40 ?	M	169	98	34.31	PRESENT	ABSENT	NO	YES	YES	0.0134	248	3	228	1.3	5.5	1.19	105.2	NO	ABSENT	ABSENT	NO	NO
8.01.001.406	BUYESRESTI	BUC-IL	URBAN	66	>60	M	174	60.8	20.08	ABSENT	PRESENT	NO	YES	NO	0.0068	146	3	143	2.1	5.4	0.6	53.04	NO	ABSENT	ABSENT	NO	NO	0.71
8.01.001.407	BUYESRESTI	BUC-IL	URBAN	56	40-60	F	158	93.3	37.37	PRESENT	ABSENT	YES	NO	NO	0.0101	150	3	45	6.7	4.9	0.89	78.68	NO	ABSENT	ABSENT	NO	NO	0.59
8.01.001.408	BUYESRESTI	BUC-IL	URBAN	40	40-60	F	166	61.8	22.43	ABSENT	ABSENT	NO	NO	NO	0.0089	109	4.5	112	4	4.1	0.79	69.84	NO	ABSENT	ABSENT	YES	NO	0.62
8.01.001.409	BUYESRESTI	BUC-IL	URBAN	32	< 40 ?	F	165	61.7	22.66	ABSENT	ABSENT	NO	YES	NO	0.005	91	24.6	249	9.9	2.6	0.44	38.9	NO	ABSENT	ABSENT	NO	NO
8.01.001.410	BUYESRESTI	BUC-IL	URBAN	60	>60	M	169	103.3	36.17	PRESENT	ABSENT	YES	NO	YES	0.0082	205	3	53	5.7	4.3	0.73	64.53	NO	ABSENT	ABSENT	NO	NO	0.85
8.01.001.411	BUYESRESTI	BUC-IL	URBAN	57	40-60	M	178	95.4	30.11	PRESENT	ABSENT	YES	NO	NO	0.0112	59	3	89	3.4	6.9	0.99	87.52	NO	ABSENT	ABSENT	NO	NO	0.73
8.01.001.412	BUYESRESTI	BUC-IL	URBAN	77	>60	M	178	104.7	33.05	PRESENT	ABSENT	NO	NO	NO	0.0132	120	146.5	112	130.8	4.1	1.17	103.43	NO	ABSENT	ABSENT	NO	NO	0.7
8.01.001.413	BUYESRESTI	BUC-IL	URBAN	51	40-60	M	173	80.8	27	ABSENT	PRESENT	YES	NO	NO	0.0094	179	35	216	16.2	4.8	0.83	73.37	NO	ABSENT	ABSENT	YES	NO	0.74
8.01.001.414	BUYESRESTI	BUC-IL	URBAN	64	>60	F	166	68.5	24.86	ABSENT	ABSENT	YES	NO	NO	0.0088	78	3	50	6	4.9	0.78	68.95	NO	ABSENT	ABSENT	YES	YES	0.75
8.01.001.415	BUYESRESTI	BUC-IL	URBAN	69	>60	F	157	42	17.04	ABSENT	ABSENT	NO	YES	NO	0.0068	127	3	41	7.3	2.7	0.6	53.04	.	ABSENT	ABSENT	YES	NO	0.55
8.01.001.416	BUYESRESTI	BUC-IL	URBAN	71	>60	F	140	76.7	39.13	PRESENT	ABSENT	NO	NO	YES	0.0098	85	3	81	3.7	5.2	0.87	76.91	NO	ABSENT	ABSENT	YES	NO	0.68
8.01.001.419	BUYESRESTI	BUC-IL	URBAN	22	< 40 ?	F	161	60.9	23.49	ABSENT	ABSENT	NO	YES	NO	0.0073	198	17.4	176	9.9	3.2	0.65	57.46	NO	ABSENT	ABSENT	YES	NO	0.54
8.01.001.420	BUYESRESTI	BUC-IL	URBAN	22	< 40 ?	M	178	83.2	26.26	ABSENT	ABSENT	NO	YES	NO	0.0081	0	1.8	190	0.9	5.6	0.72	63.65	NO	ABSENT	ABSENT	NO	NO	0.6
8.01.001.421	BUYESRESTI	BUC-IL	URBAN	22	< 40 ?	M	173	77.5	25.89	ABSENT	ABSENT	NO	YES	NO	0.0116	80	3	92	3.3	5.7	1.03	91.05	NO	ABSENT	ABSENT	YES	NO	0.61
8.01.001.422	BUYESRESTI	BUC-IL	URBAN	71	>60	F	143	52.4	25.62	ABSENT	ABSENT	YES	NO	NO	0.0076	108	8.1	90	9	5.4	0.67	59.23	NO	ABSENT	ABSENT	NO	NO	0.73
8.01.001.423	BUYESRESTI	BUC-IL	URBAN	47	40-60	F	159	72.7	28.76	ABSENT	PRESENT	NO	NO	NO	0.009	207	3.3	230	1.4	2.9	0.8	70.72	NO	ABSENT	ABSENT	YES	NO	0.65
8.01.001.424	BUYESRESTI	BUC-IL	URBAN	79	>60	F	155	80	33.3	PRESENT	ABSENT	NO	NO	YES	0.0094	50	3	33	9.1	4.6	0.83	73.37	NO	ABSENT	ABSENT	NO	NO	0.76
8.01.001.425	BUYESRESTI	BUC-IL	URBAN	24	< 40 ?	F	162	42.5	16.19	ABSENT	ABSENT	NO	YES	NO	0.0082	141	7.7	254	3	3.6	0.73	64.53	NO	ABSENT	ABSENT	NO	NO
8.01.001.426	BUYESRESTI	BUC-IL	URBAN	22	< 40 ?	F	169	65.5	22.93	ABSENT	PRESENT	NO	YES	NO	0.0076	240	3	114	2.6	5.1	0.67	59.23	UNKNOWN	ABSENT	ABSENT	YES	NO
8.01.001.427	BUYESRESTI	BUC-IL	URBAN	28	< 40 ?	F	167	47	16.85	ABSENT	PRESENT	NO	YES	NO	0.0081	66	3	162	1.9	4.8	0.72	63.65	NO	ABSENT	ABSENT	NO	NO	0.39
8.01.001.428	BUYESRESTI	BUC-IL	URBAN	33	< 40 ?	M	172	85.6	28.93	ABSENT	PRESENT	NO	YES	NO	0.0095	145	3	159	1.9	4.5	0.84	74.26	NO	ABSENT	ABSENT	NO	NO	0.61
8.01.001.429	BUYESRESTI	BUC-IL	URBAN	67	>60	M	164	90.2	33.54	PRESENT	ABSENT	YES	NO	NO	0.0137	119	19.3	107	18	7.4	1.21	106.96	NO	ABSENT	ABSENT	UNKNOWN	NO	0.78
8.01.001.430	BUYESRESTI	BUC-IL	URBAN	67	>60	F	168	103.5	36.67	PRESENT	ABSENT	YES	NO	NO	0.0077	23	3	26	11.5	4.1	0.68	60.11	NO	ABSENT	ABSENT	NO	NO	0.82
8.01.001.431	BUYESRESTI	BUC-IL	URBAN	33	< 40 ?	F	158	44.3	17.75	ABSENT	ABSENT	YES	YES	NO	0.0072	39	6.2	113	5.5	3	0.64	56.58	NO	ABSENT	ABSENT	NO	NO	0.44
8.01.001.432	BUYESRESTI	BUC-IL	URBAN	27	< 40 ?	F	170	64.7	22.39	ABSENT	ABSENT	NO	YES	NO	0.0075	73	3	81	3.7	2.9	0.66	58.34	NO	ABSENT	ABSENT	YES	NO
8.01.001.433	BUYESRESTI	BUC-IL	URBAN	25	< 40 ?	M	184	94.6	27.94	ABSENT	PRESENT	YES	YES	NO	0.0101	124	10.5	246	4.3	4	0.89	78.68	NO	ABSENT	ABSENT	NO	NO
8.01.001.434	BUYESRESTI	BUC-IL	URBAN	23	< 40 ?	F	160	53.6	20.94	ABSENT	PRESENT	YES	YES	NO	0.0082	82	7	186	3.8	3.5	0.73	64.53	NO	ABSENT	ABSENT	NO	NO	0.42
8.01.001.435	BUYESRESTI	BUC-IL	URBAN	74	>60	F	155	71.4	29.72	ABSENT	ABSENT	NO	NO	NO	0.0076	76	3.7	123	3	5.4	0.67	59.23	.	ABSENT	ABSENT	NO	NO	0.67
8.01.001.436	BUYESRESTI	BUC-IL	URBAN	27	< 40 ?	M	168	59.6	21.12	ABSENT	ABSENT	NO	YES	NO	0.0102	110	3.1	168	1.8	5	0.9	79.56	NO	ABSENT	ABSENT	NO	NO	0.43
8.01.001.437	BUYESRESTI	BUC-IL	URBAN	60	>60	F	160	102.3	39.96	PRESENT	ABSENT	NO	NO	NO	0.0084	144	3	102	2.9	3.5	0.74	65.42	NO	ABSENT	ABSENT	NO	NO	0.61
8.01.001.438	BUYESRESTI	BUC-IL	URBAN	48	40-60	F	158	67.5	27.04	ABSENT	PRESENT	YES	NO	NO	0.0089	66	3	76	3.9	5.1	0.79	69.84	NO	ABSENT	ABSENT	YES	NO	0.7
8.01.001.439	BUYESRESTI	BUC-IL	URBAN	25	< 40 ?	F	163	56.3	21.19	ABSENT	ABSENT	NO	YES	YES	0.008	46	3.2	146	2.2	3.7	0.71	62.76	NO	ABSENT	ABSENT	NO	NO	0.46
8.01.001.440	BUYESRESTI	BUC-IL	URBAN	48	40-60	M	184	93.3	27.56	ABSENT	ABSENT	NO	YES	NO	0.0122	147	10.1	425	2.4	5.5	1.08	95.47	NO	ABSENT	ABSENT	NO	NO	0.62
8.01.001.441	BUYESRESTI	BUC-IL	URBAN	61	>60	M	169	86.6	30.32	PRESENT	PRESENT	YES	NO	NO	0.0086	114	19.2	286	6.7	5.4	0.76	67.18	NO	ABSENT	ABSENT	YES	NO	0.76
8.01.001.442	BUYESRESTI	BUC-IL	URBAN	46	40-60	M	172	72.9	24.64	ABSENT	ABSENT	NO	YES	NO	0.0118	133	3	167	1.8	5.7	1.04	91.94	NO	ABSENT	ABSENT	NO	NO	0.69
8.01.001.501	BUYESRESTI	BUC-IL	URBAN	58	40-60	M	179	78	24.34	ABSENT	ABSENT	NO	NO	NO	0.0127	87	3	41	7.3	4.6	1.12	99.01	NO	ABSENT	ABSENT	NO	NO	0.68
8.01.001.502	BUYESRESTI	BUC-IL	URBAN	36	< 40 ?	M	179	83	25.9	ABSENT	ABSENT	NO	YES	NO	0.0106	178	3	222	1.4	5.3	0.94	83.1	NO	ABSENT	ABSENT	NO	NO	0.48
8.01.001.503	BUYESRESTI	BUC-IL	URBAN	28	< 40 ?	M	164	92	34.21	PRESENT	PRESENT	NO	YES	NO	0.0116	160	3	253	1.2	5	1.03	91.05	YES	ABSENT	PRESENT	YES	NO	0.46
8.01.001.504	BUYESRESTI	BUC-IL	URBAN	38	< 40 ?	F	155	58	24.14	ABSENT	PRESENT	YES	NO	NO	0.0079	47	3	78	3.8	3.6	0.7	61.88	NO	ABSENT	ABSENT	YES	NO	0.55
8.01.001.505	BUYESRESTI	BUC-IL	URBAN	60	>60	F	150	60	26.67	ABSENT	ABSENT	NO	NO	NO	0.0084	170	4.7	110	4.3	5.6	0.74	65.42	.	ABSENT	ABSENT	YES	NO	0.72
8.01.001.506	BUYESRESTI	BUC-IL	URBAN	59	40-60	F	145	70	33.29	PRESENT	ABSENT	YES	NO	NO	0.0086	152	3	134	2.2	5.2	0.76	67.18	NO	ABSENT	ABSENT	NO	NO	0.69
8.01.001.507	BUYESRESTI	BUC-IL	URBAN	68	>60	M	167	69	24.74	ABSENT	ABSENT	NO	YES	YES	0.0094	59	3	70	4.3	4.9	0.83	73.37	NO	ABSENT	ABSENT	YES	NO	0.58
8.01.001.508	BUYESRESTI	BUC-IL	URBAN	62	>60	F	159	80	31.64	PRESENT	ABSENT	YES	NO	NO	0.0095	126	3	141	2.1	5.1	0.84	74.26	YES	ABSENT	PRESENT	NO	NO	0.8
8.01.001.509	BUYESRESTI	BUC-IL	URBAN	76	>60	M	170	64	22.15	ABSENT	PRESENT	NO	NO	NO	0.0123	113	134.6	82	164.1	5.5	1.09	96.36	NO	ABSENT	ABSENT	NO	NO	0.94
8.01.001.510	BUYESRESTI	BUC-IL	URBAN	76	>60	M	164	80	29.74	ABSENT	PRESENT	YES	NO	YES	0.0095	60	3	135	2.2	3.9	0.84	74.26	NO	ABSENT	ABSENT	NO	NO	0.91
8.01.001.511	BUYESRESTI	BUC-IL	URBAN	48	40-60	M	183	90	26.87	ABSENT	ABSENT	YES	NO	YES	0.0118	123	3	73	4.1	8.7	1.04	91.94	UNKNOWN	ABSENT	ABSENT	NO	NO	0.69
8.01.001.512	BUYESRESTI	BUC-IL	URBAN	60	>60	F	164	74	27.51	ABSENT	ABSENT	YES	NO	NO	0.007	96	12.8	138	9.3	4.7	0.62	54.81	NO	ABSENT	ABSENT	YES	NO	0.93
8.01.001.513	BUYESRESTI	BUC-IL	URBAN	23	< 40 ?	F	163	73	27.48	ABSENT	PRESENT	NO	YES	YES	0.0079	84	3	130	2.3	5.5	0.7	61.88	NO	ABSENT	ABSENT	YES	NO	0.45
8.01.001.514	BUYESRESTI	BUC-IL	URBAN	73	>60	M	175	75	24.49	ABSENT	ABSENT	YES	NO	YES	0.112	66	386	31	1245.2	7.9	9.91	876.04	YES	ABSENT	PRESENT	YES	NO	0.93
8.01.001.515	BUYESRESTI	BUC-IL	URBAN	27	< 40 ?	F	166	58	21.05	ABSENT	ABSENT	NO	YES	NO	0.0079	270	3	142	2.1	2.4	0.7	61.88	NO	ABSENT	ABSENT	NO	NO	0.46
8.01.001.518	BUYESRESTI	BUC-IL	URBAN	37	< 40 ?	M	185	114	33.31	PRESENT	PRESENT	NO	YES	NO	0.0118	188	3	194	1.5	6.7	1.04	91.94	NO	ABSENT	ABSENT	NO	NO	0.53
8.01.001.519	BUYESRESTI	BUC-IL	URBAN	33	< 40 ?	M	170	78	26.99	ABSENT	ABSENT	NO	YES	NO	0.0095	181	3	175	1.7	5.5	0.84	74.26	NO	ABSENT	ABSENT	YES	NO	0.4
8.01.001.520	BUYESRESTI	BUC-IL	URBAN	32	< 40 ?	M	167	56	20.08	ABSENT	ABSENT	NO	YES	NO	0.0102	60	3	64	4.7	4	0.9	79.56	NO	ABSENT	ABSENT	NO	NO	0.46
8.01.001.521	BUYESRESTI	BUC-IL	URBAN	32	< 40 ?	F	167	71	25.46	ABSENT	PRESENT	NO	YES	NO	0.0078	238	4.8	153	3.1	3.2	0.69	61	NO	ABSENT	ABSENT	UNKNOWN	NO	0.45
8.01.001.522	BUYESRESTI	BUC-IL	URBAN	23	< 40 ?	M	173	73	24.39	ABSENT	PRESENT	NO	YES	YES	0.0094	163	5.7	307	1.9	5.1	0.83	73.37	NO	ABSENT	ABSENT	UNKNOWN	NO	0.46
8.01.001.523	BUYESRESTI	BUC-IL	URBAN	44	40-60	M	171	62	21.2	ABSENT	ABSENT	NO	YES	YES	0.0101	190	3	169	1.8	6.1	0.89	78.68	NO	ABSENT	ABSENT	NO	NO	0.65
8.01.001.524	BUYESRESTI	BUC-IL	URBAN	38	< 40 ?	M	178	81	25.56	ABSENT	PRESENT	NO	NO	NO	0.0108	105	3	98	3.1	5.2	0.96	84.86	NO	ABSENT	ABSENT	UNKNOWN	NO	0.5
8.01.001.525	BUYESRESTI	BUC-IL	URBAN	33	< 40 ?	M	180	88	27.16	ABSENT	PRESENT	NO	NO	NO	0.009	187	5.6	183	3.1	3.9	0.8	70.72	NO	ABSENT	ABSENT	YES	NO	0.49
8.01.001.526	BUYESRESTI	BUC-IL	URBAN	28	< 40 ?	F	157	52	21.1	ABSENT	ABSENT	NO	YES	NO	0.0076	221	3	162	1.9	3.2	0.67	59.23	NO	ABSENT	ABSENT	YES	NO	0.46
8.01.001.527	BUYESRESTI	BUC-IL	URBAN	24	< 40 ?	F	164	62.5	23.24	ABSENT	PRESENT	NO	YES	NO	0.0082	98	6.7	178	3.8	3.8	0.73	64.53	NO	ABSENT	ABSENT	NO	NO	0.43
8.01.001.528	BUYESRESTI	BUC-IL	URBAN	75	>60	M	182	101	30.49	PRESENT	ABSENT	YES	NO	YES	0.0155	133	3	62	4.8	5.6	1.37	121.11	NO	ABSENT	ABSENT	NO	NO	0.9
8.01.001.529	BUYESRESTI	BUC-IL	URBAN	42	40-60	F	158	56	22.43	ABSENT	ABSENT	NO	YES	NO	0.0082	176	3	179	1.7	3.9	0.73	64.53	NO	ABSENT	ABSENT	NO	NO	0.46
8.01.001.530	BUYESRESTI	BUC-IL	URBAN	31	< 40 ?	M	172	74	25.01	ABSENT	PRESENT	NO	YES	NO	0.0088	43	3	83	3.6	2.7	0.78	68.95	NO	ABSENT	ABSENT	NO	NO	0.53
8.01.001.531	BUYESRESTI	BUC-IL	URBAN	52	40-60	M	174	76	25.1	ABSENT	ABSENT	NO	NO	NO	0.0145	96	3	125	2.4	6.6	1.28	113.15	NO	ABSENT	ABSENT	YES	NO	0.58
8.01.001.532	BUYESRESTI	BUC-IL	URBAN	54	40-60	F	154	82	34.58	PRESENT	ABSENT	YES	NO	NO	0.0069	22	9.6	134	7.2	6.9	0.61	53.92	NO	ABSENT	ABSENT	YES	NO	0.63
8.01.001.533	BUYESRESTI	BUC-IL	URBAN	55	40-60	M	180	82	25.31	ABSENT	ABSENT	NO	YES	YES	0.0085	76	3.4	157	2.2	5.5	0.75	66.3	NO	ABSENT	ABSENT	NO	NO	0.53
8.01.001.534	BUYESRESTI	BUC-IL	URBAN	39	< 40 ?	F	165	58	21.3	ABSENT	PRESENT	NO	NO	YES	0.0073	140	3	184	1.6	3.3	0.65	57.46	NO	ABSENT	ABSENT	YES	NO	0.43
8.01.001.535	BUYESRESTI	BUC-IL	URBAN	40	40-60	M	160	61.5	24.02	ABSENT	PRESENT	NO	YES	NO	0.0104	103	3.6	195	1.8	4.5	0.92	81.33	NO	ABSENT	ABSENT	YES	NO	0.53
8.01.001.536	BUYESRESTI	BUC-IL	URBAN	56	40-60	M	173	96	32.08	PRESENT	ABSENT	YES	NO	NO	0.0101	106	5.1	203	2.5	6.8	0.89	78.68	NO	ABSENT	ABSENT	NO	NO	0.75
8.01.001.601	BUYESRESTI	BUC-IL	URBAN	47	40-60	F	156	52	21.37	ABSENT	PRESENT	YES	NO	NO	0.0077	132	4.9	138	3.6	2.4	0.68	60.11	NO	ABSENT	ABSENT	NO	NO	0.46
8.01.001.602	BUYESRESTI	BUC-IL	URBAN	66	>60	F	160	71	27.73	ABSENT	ABSENT	YES	NO	YES	0.0089	69	3	43	7	4.8	0.79	69.84	NO	ABSENT	ABSENT	NO	NO	0.63
8.01.001.603	BUYESRESTI	BUC-IL	URBAN	66	>60	M	178	98	30.93	PRESENT	ABSENT	YES	NO	NO	0.0107	190	3.2	95	3.4	4	0.95	83.98	NO	ABSENT	ABSENT	YES	NO
8.01.001.605	BUYESRESTI	BUC-IL	URBAN	48	40-60	F	146	59	27.68	ABSENT	ABSENT	NO	NO	NO	0.0064	79	3	52	5.8	4.9	0.57	50.39	NO	ABSENT	ABSENT	YES	NO	0.67
8.01.001.606	BUYESRESTI	BUC-IL	URBAN	57	40-60	M	173	68	22.72	ABSENT	PRESENT	YES	NO	NO	0.0147	140	79.6	124	64.2	8.6	1.3	114.92	NO	ABSENT	ABSENT	YES	NO	0.71
8.01.001.607	BUYESRESTI	BUC-IL	URBAN	54	40-60	F	157	63	25.56	ABSENT	ABSENT	NO	NO	NO	0.0084	22	3	33	9.1	5.5	0.74	65.42	NO	ABSENT	ABSENT	YES	NO	0.59
8.01.001.608	BUYESRESTI	BUC-IL	URBAN	76	>60	F	155	69	28.72	ABSENT	ABSENT	YES	NO	NO	0.0076	108	3	45	6.7	4.7	0.67	59.23	NO	ABSENT	ABSENT	NO	NO	0.66
8.01.001.609	BUYESRESTI	BUC-IL	URBAN	66	>60	M	167	85	30.48	PRESENT	ABSENT	NO	NO	NO	0.0097	69	3	42	7.1	5.4	0.86	76.02	NO	.	ABSENT	.	0	0.6
8.01.001.610	BUYESRESTI	BUC-IL	URBAN	64	>60	F	159	78	30.85	PRESENT	ABSENT	YES	NO	NO	0.0082	51	0.5	36	1.4	3.4	0.73	64.53	NO	ABSENT	ABSENT	YES	NO	0.69
8.01.001.611	BUYESRESTI	BUC-IL	URBAN	31	< 40 ?	M	175	54	17.63	ABSENT	ABSENT	YES	YES	NO	0.0078	238	7	180	3.9	3.6	0.69	61	NO	ABSENT	ABSENT	NO	NO	0.45
8.01.001.612	BUYESRESTI	BUC-IL	URBAN	66	>60	F	142	59	29.26	ABSENT	PRESENT	YES	YES	NO	0.009	68	3	35	8.6	4.9	0.8	70.72	NO	ABSENT	ABSENT	YES	NO	0.62
8.01.001.613	BUYESRESTI	BUC-IL	URBAN	71	>60	F	158	73	29.24	ABSENT	ABSENT	YES	NO	NO	0.0073	105	3	121	2.5	4.4	0.65	57.46	NO	.	ABSENT	.	0	0.67
8.01.001.614	BUYESRESTI	BUC-IL	URBAN	45	40-60	F	165	71	26.08	ABSENT	ABSENT	YES	YES	NO	0.0071	165	3	68	4.4	3.6	0.63	55.69	NO	ABSENT	ABSENT	NO	NO	0.49
8.01.001.615	BUYESRESTI	BUC-IL	URBAN	56	40-60	M	171	107	36.59	PRESENT	ABSENT	YES	NO	NO	0.0094	124	9.4	199	4.7	8	0.83	73.37	NO	ABSENT	ABSENT	NO	NO	0.67
8.01.001.616	BUYESRESTI	BUC-IL	URBAN	44	40-60	F	158	76	30.44	PRESENT	ABSENT	NO	YES	NO	0.0077	139	3	139	2.2	2.9	0.68	60.11	NO	ABSENT	ABSENT	NO	NO	0.53
8.01.001.617	BUYESRESTI	BUC-IL	URBAN	53	40-60	F	152	63	27.27	ABSENT	ABSENT	YES	NO	NO	0.007	64	3	15	20	3.6	0.62	54.81	NO	ABSENT	ABSENT	NO	NO	0.61
8.01.001.618	BUYESRESTI	BUC-IL	URBAN	25	< 40 ?	F	172	58	19.61	ABSENT	ABSENT	NO	YES	YES	0.0073	140	4	99	4	3.1	0.65	57.46	NO	ABSENT	ABSENT	NO	NO	0.51
8.01.001.620	BUYESRESTI	BUC-IL	URBAN	20	< 40 ?	F	157	57	23.12	ABSENT	PRESENT	NO	YES	YES	0.0075	60	150.5	215	70	3.9	0.66	58.34	NO	ABSENT	ABSENT	NO	NO	0.51
8.01.001.621	BUYESRESTI	BUC-IL	URBAN	36	< 40 ?	M	162	76	28.96	ABSENT	PRESENT	NO	YES	NO	0.0107	130	3.8	251	1.5	6.5	0.95	83.98	NO	ABSENT	ABSENT	NO	NO	0.4
8.01.001.622	BUYESRESTI	BUC-IL	URBAN	35	< 40 ?	F	164	57	21.19	ABSENT	ABSENT	NO	YES	NO	0.007	124	4.6	155	3	3.5	0.62	54.81	NO	ABSENT	ABSENT	NO	NO
8.01.001.623	BUYESRESTI	BUC-IL	URBAN	23	< 40 ?	F	168	61	21.61	ABSENT	PRESENT	NO	YES	NO	0.0085	164	3	149	2	3.5	0.75	66.3	NO	ABSENT	ABSENT	NO	NO	0.4
8.01.001.624	BUYESRESTI	BUC-IL	URBAN	63	>60	M	167	84	30.12	PRESENT	ABSENT	NO	NO	NO	0.009	157	4.4	179	2.5	4.2	0.8	70.72	NO	ABSENT	ABSENT	NO	NO	0.61
8.01.001.625	BUYESRESTI	BUC-IL	URBAN	60	>60	F	152	77	33.33	PRESENT	ABSENT	NO	NO	YES	0.0094	135	3	103	2.9	8.3	0.83	73.37	NO	ABSENT	ABSENT	NO	NO	0.66
8.01.001.626	BUYESRESTI	BUC-IL	URBAN	43	40-60	F	156	57	23.42	ABSENT	PRESENT	NO	YES	NO	0.008	111	3.6	175	2.1	3.5	0.71	62.76	NO	ABSENT	ABSENT	NO	NO	0.6
8.01.001.627	BUYESRESTI	BUC-IL	URBAN	65	>60	F	160	72	28.13	ABSENT	ABSENT	YES	NO	NO	0.0115	69	4	21	19	4.7	1.02	90.17	NO	ABSENT	ABSENT	NO	NO	0.56
8.01.001.628	BUYESRESTI	BUC-IL	URBAN	31	< 40 ?	M	175	76	24.82	ABSENT	ABSENT	NO	NO	YES	0.0095	154	3	196	1.5	4.8	0.84	74.26	NO	PRESENT	PRESENT	NO	NO	0.45
8.01.001.630	BUYESRESTI	BUC-IL	URBAN	35	< 40 ?	M	178	108	34.09	PRESENT	PRESENT	NO	YES	NO	0.0103	119	8.8	142	6.2	6.2	0.91	80.44	NO	ABSENT	ABSENT	NO	NO	0.58
8.02.008.003	VOLUNTARI	BUC-IL	URBAN	78	>60	F	154	91	38.37	PRESENT	ABSENT	YES	NO	NO	0.0084	191	3	26	11.5	5.5	0.74	65.42	NO	ABSENT	ABSENT	YES	NO
8.02.008.004	VOLUNTARI	BUC-IL	URBAN	66	>60	F	155	100	41.62	PRESENT	ABSENT	YES	NO	NO	0.0064	142	3	54	5.6	5	0.57	50.39	NO	ABSENT	ABSENT	UNKNOWN	NO
8.02.008.005	VOLUNTARI	BUC-IL	URBAN	34	< 40 ?	M	179	86	26.84	ABSENT	PRESENT	NO	NO	NO	0.0101	161	3	209	1.4	5.1	0.89	78.68	NO	ABSENT	ABSENT	UNKNOWN	NO
8.02.008.007	VOLUNTARI	BUC-IL	URBAN	48	40-60	F	162	71	27.05	ABSENT	ABSENT	NO	YES	YES	0.0101	68	11.2	217	5.2	4.6	0.89	78.68	NO	ABSENT	ABSENT	YES	NO
8.02.008.008	VOLUNTARI	BUC-IL	URBAN	44	40-60	M	183	93	27.77	ABSENT	PRESENT	NO	YES	NO	0.0129	88	11	319	3.4	7.3	1.14	100.78	NO	PRESENT	PRESENT	NO	UNKNOWN
8.02.008.009	VOLUNTARI	BUC-IL	URBAN	79	>60	F	155	81	33.71	PRESENT	ABSENT	YES	NO	NO	0.0306	101	780.5	61	1279.5	4.2	2.71	239.56	NO	ABSENT	PRESENT	YES	NO
8.02.008.010	VOLUNTARI	BUC-IL	URBAN	55	40-60	M	171	106	36.25	PRESENT	PRESENT	YES	NO	NO	0.009	195	14.2	227	6.3	4.7	0.8	70.72	NO	ABSENT	ABSENT	YES	NO
8.02.008.011	VOLUNTARI	BUC-IL	URBAN	25	< 40 ?	F	162	63	24.01	ABSENT	PRESENT	YES	YES	NO	0.0079	93	23.7	324	7.3	4.1	0.7	61.88	NO	ABSENT	ABSENT	NO	NO
8.02.008.012	VOLUNTARI	BUC-IL	URBAN	58	40-60	F	154	92	38.79	PRESENT	PRESENT	NO	NO	NO	0.0078	89	3	88	3.4	4.7	0.69	61	NO	ABSENT	ABSENT	NO	NO
8.02.008.013	VOLUNTARI	BUC-IL	URBAN	45	40-60	M	156	69	28.35	ABSENT	ABSENT	NO	YES	NO	0.0102	175	3	219	1.4	4.2	0.9	79.56	NO	ABSENT	ABSENT	NO	NO
8.02.008.014	VOLUNTARI	BUC-IL	URBAN	23	< 40 ?	F	150	54	24	ABSENT	PRESENT	NO	YES	YES	0.0066	54	3	92	3.3	5	0.58	51.27	NO	ABSENT	ABSENT	NO	NO
8.02.008.018	VOLUNTARI	BUC-IL	URBAN	58	40-60	F	164	64.5	23.98	ABSENT	ABSENT	NO	YES	NO	0.0082	124	3	59	5.1	3.2	0.73	64.53	NO	ABSENT	ABSENT	NO	NO
8.02.008.019	VOLUNTARI	BUC-IL	URBAN	48	40-60	F	156	80	32.87	PRESENT	ABSENT	YES	NO	NO	0.0071	117	3	81	3.7	4.8	0.63	55.69	NO	ABSENT	ABSENT	NO	NO
8.02.008.021	VOLUNTARI	BUC-IL	URBAN	50	40-60	M	177	84	26.81	ABSENT	ABSENT	YES	NO	NO	0.0098	178	3.7	157	2.4	4	0.87	76.91	NO	ABSENT	ABSENT	NO	NO
8.02.008.022	VOLUNTARI	BUC-IL	URBAN	65	>60	F	168	112	39.68	PRESENT	ABSENT	YES	NO	NO	0.0086	125	3	32	9.4	6.1	0.76	67.18	NO	ABSENT	ABSENT	YES	NO
8.02.008.023	VOLUNTARI	BUC-IL	URBAN	66	>60	M	173	77.5	25.89	ABSENT	PRESENT	NO	YES	NO	0.0097	110	3	68	4.4	4.2	0.86	76.02	NO	ABSENT	ABSENT	YES	NO
8.02.008.024	VOLUNTARI	BUC-IL	URBAN	34	< 40 ?	M	180	99	30.56	PRESENT	ABSENT	YES	NO	NO	0.0112	163	3.9	284	1.4	7.5	0.99	87.52	NO	ABSENT	ABSENT	NO	NO
8.02.008.025	VOLUNTARI	BUC-IL	URBAN	65	>60	M	171	80.5	27.53	ABSENT	ABSENT	NO	YES	NO	0.0098	120	3	62	4.8	5.1	0.87	76.91	NO	ABSENT	ABSENT	NO	NO
8.02.008.026	VOLUNTARI	BUC-IL	URBAN	34	< 40 ?	F	165	71	26.08	ABSENT	ABSENT	NO	YES	NO	0.0066	117	12.7	73	17.4	3.6	0.58	51.27	NO	ABSENT	ABSENT	NO	NO
8.02.015.001	CHIAJNA	BUC-IL	RURAL	63	>60	F	159	97	38.37	PRESENT	ABSENT	YES	NO	YES	0.0077	185	3.2	83	3.9	4.7	0.68	60.11	NO	ABSENT	ABSENT	YES	NO
8.02.015.003	CHIAJNA	BUC-IL	RURAL	53	40-60	F	159	112	44.3	PRESENT	ABSENT	YES	NO	NO	0.0095	70	3	78	3.8	4.7	0.84	74.26	NO	ABSENT	ABSENT	NO	NO
8.02.015.004	CHIAJNA	BUC-IL	RURAL	77	>60	M	164	84	31.23	PRESENT	ABSENT	YES	NO	YES	0.0096	97	18.5	119	15.5	4.5	0.85	75.14	NO	ABSENT	ABSENT	NO	NO
8.02.015.005	CHIAJNA	BUC-IL	RURAL	56	40-60	F	159	70	27.69	ABSENT	PRESENT	YES	NO	NO	0.0073	93	5.1	51	10	4.4	0.65	57.46	NO	ABSENT	ABSENT	NO	NO
8.02.015.006	CHIAJNA	BUC-IL	RURAL	65	>60	M	170	92.5	32.01	PRESENT	PRESENT	NO	NO	NO	0.0101	156	3	89	3.4	6	0.89	78.68	UNKNOWN	ABSENT	ABSENT	NO	NO
8.02.015.007	CHIAJNA	BUC-IL	RURAL	36	< 40 ?	F	159	53.9	21.32	ABSENT	ABSENT	YES	YES	NO	0.0078	132	3	112	2.7	3.1	0.69	61	NO	ABSENT	ABSENT	NO	NO
8.02.015.008	CHIAJNA	BUC-IL	RURAL	47	40-60	F	166	74	26.85	ABSENT	ABSENT	NO	NO	YES	0.0077	168	6.4	177	3.6	3.5	0.68	60.11	NO	ABSENT	ABSENT	NO	NO
8.02.015.009	CHIAJNA	BUC-IL	RURAL	60	>60	M	171	90	30.78	PRESENT	ABSENT	NO	NO	NO	0.0111	134	3	117	2.6	7.4	0.98	86.63	NO	ABSENT	ABSENT	NO	NO
8.02.015.010	CHIAJNA	BUC-IL	RURAL	36	< 40 ?	M	180	98	30.25	PRESENT	PRESENT	NO	YES	NO	0.0113	118	7.2	328	2.2	6	1	88.4	NO	ABSENT	ABSENT	NO	NO
8.02.015.011	CHIAJNA	BUC-IL	RURAL	57	40-60	F	154	58	24.46	ABSENT	ABSENT	YES	NO	NO	0.009	138	3	154	1.9	2.6	0.8	70.72	NO	ABSENT	ABSENT	NO	NO
8.02.015.012	CHIAJNA	BUC-IL	RURAL	30	< 40 ?	F	165	59.5	21.85	ABSENT	ABSENT	NO	YES	NO	0.0063	75	26.7	269	9.9	4.8	0.56	49.5	NO	ABSENT	ABSENT	NO	NO
8.02.015.013	CHIAJNA	BUC-IL	RURAL	50	40-60	F	169	80	28.01	ABSENT	ABSENT	NO	YES	YES	0.009	145	3	71	4.2	5.6	0.8	70.72	NO	ABSENT	ABSENT	YES	NO
8.02.015.014	CHIAJNA	BUC-IL	RURAL	26	< 40 ?	F	169	55	19.26	ABSENT	ABSENT	NO	YES	NO	0.0075	87	12.1	176	6.9	4.1	0.66	58.34	NO	ABSENT	ABSENT	NO	NO
8.02.015.015	CHIAJNA	BUC-IL	RURAL	48	40-60	M	186	153.6	44.4	PRESENT	ABSENT	YES	NO	NO	0.0087	0	0.5	131	0.4	5.7	0.77	68.07	NO	ABSENT	ABSENT	YES	NO
8.02.015.016	CHIAJNA	BUC-IL	RURAL	24	< 40 ?	M	175	64	20.9	ABSENT	PRESENT	NO	YES	NO	0.0107	56	3	146	2.1	5.3	0.95	83.98	NO	ABSENT	ABSENT	NO	NO
8.02.015.017	CHIAJNA	BUC-IL	RURAL	19	< 40 ?	M	175	91	29.71	ABSENT	ABSENT	YES	NO	NO	0.0124	137	3.4	286	1.2	3.7	1.1	97.24	NO	ABSENT	ABSENT	YES	YES
8.02.015.018	CHIAJNA	BUC-IL	RURAL	47	40-60	M	175	83	27.1	ABSENT	PRESENT	NO	NO	YES	0.011	165	3	155	1.9	2.9	0.97	85.75	NO	ABSENT	ABSENT	UNKNOWN	NO
8.02.015.019	CHIAJNA	BUC-IL	RURAL	31	< 40 ?	F	165	63	23.14	ABSENT	ABSENT	NO	YES	NO	0.0068	142	7.9	282	2.8	3.4	0.6	53.04	NO	ABSENT	ABSENT	NO	NO
